# Supplementary material for: Transcriptional Reprogramming of Rice Cells by Xanthomonas oryzae TALEs
Source: Front Plant Sci. 2019 Feb 25;10:162. doi: 10.3389/fpls.2019.00162 (PMC6397873; doi:10.3389/fpls.2019.00162)
Supplement: Supplementary file 2 [file Data_Sheet_2.xls]

## Sheet: Tabelle1
	PXO83 A01	PXO83 A02	PXO83 A03	PXO142 C01	PXO142 C02	PXO142 C03	ICMP3125 D01	ICMP3125 D02	ICMP3125 D03	Control E01	Control E02	Control E03	PXO83 pval	PXO83 qval	PXO83 b	PXO142 pval	PXO142 qval	PXO142 b	ICMP3125 pval	ICMP3125 qval	ICMP3125 b	annotation
LOC_Os01g73890	17.8057	15.1995	17.0765	17.7941	15.6776	19.1753	49.2954	65.412	41.2537	17.9598	17.6828	16.576	0.723454	0.999904	-0.0437455	0.952341	0.999971	0.00738899	2.57653e-18	6.28364e-14	1.07911	transcription initiation factor IIA gamma chain, putative, expressed
LOC_Os04g43730	0	0.0190694	0.0477455	0	0	0.0312747	5.58895	9.95941	3.60542	0.019972	0.0123308	0	0.680709	0.999904	0.310576	0.829224	0.999971	-0.162797	2.28145e-14	2.782e-10	5.76151	OsWAK51 - OsWAK receptor-like protein kinase, expressed
LOC_Os10g25430	46.9892	20.1054	24.5352	35.6192	23.2978	17.3528	21.9713	10.2377	10.0668	42.5564	22.0411	17.0094	0.23892	0.999904	0.123956	0.760301	0.999971	-0.0321113	8.29557e-10	6.11029e-06	-0.646169	Ser/Thr protein phosphatase family protein, putative, expressed
LOC_Os06g29790	8.1085	6.20455	5.67201	13.8803	4.29918	7.28867	20.9769	36.181	14.1016	4.45808	2.94838	2.72441	0.0266132	0.999904	0.690256	0.00744536	0.999971	0.833184	1.00218e-09	6.11029e-06	1.90191	phosphate transporter 1, putative, expressed
LOC_Os07g23570	39.8493	37.5071	50.2326	29.6659	34.9562	52.4242	40.7408	43.0429	58.6261	23.4191	23.576	43.1606	3.9907e-06	0.0108139	0.381961	0.000828883	0.999971	0.276869	3.06639e-09	1.49566e-05	0.490966	cytochrome P450 72A1, putative, expressed
LOC_Os09g29820	14.7076	6.78331	3.81418	5.58797	2.31246	5.51533	5.35572	13.2699	5.20476	0.421446	0.223032	0.678376	1.92598e-08	9.39417e-05	2.82455	6.218e-06	0.0379111	2.27171	2.0498e-08	8.33176e-05	2.81913	bZIP transcription factor domain containing protein, expressed
LOC_Os04g54640	50.4019	32.6821	22.6601	38.4021	27.5445	19.3393	24.3239	19.4255	15.7012	44.4724	35.0312	20.7804	0.595441	0.999904	0.0469848	0.0881974	0.999971	-0.150872	3.74459e-08	0.000130462	-0.486909	peptidase, cysteine peptidase active site, putative, expressed
LOC_Os02g12380	13.538	14.0497	10.5811	12.5043	12.1812	14.3073	21.8434	20.1576	16.5143	11.6733	12.9758	10.0329	0.34191	0.999904	0.0931221	0.212726	0.999971	0.122096	8.28517e-08	0.000252573	0.525264	histone deacetylase, putative, expressed
LOC_Os01g22980	85.8374	37.3796	31.5438	68.3971	29.2549	24.4158	49.6593	22.7263	15.6769	76.1904	33.7678	21.0748	0.00307651	0.999904	0.207547	0.641089	0.999971	-0.0326871	1.38151e-07	0.000368673	-0.369357	OsSCP3 - Putative Serine Carboxypeptidase homologue, expressed
LOC_Os11g42950	1.32949	1.41342	0.832681	0.944645	0.566872	0.681788	1.93652	3.75853	3.43175	0.0870778	0.268812	0.0613216	0.000293896	0.311632	2.01139	0.00525288	0.999971	1.55056	1.5117e-07	0.000368673	2.9172	expressed protein
LOC_Os09g37620	103.97	57.2442	15.2109	83.7586	42.3406	15.3048	71.1572	32.4182	10.8423	93.3201	54.5519	15.3029	0.49069	0.999904	0.0496323	0.100196	0.999971	-0.118383	1.95437e-07	0.000398703	-0.374729	flavin-containing monooxygenase family protein, putative, expressed
LOC_Os04g45600	66.8518	38.4033	30.4534	49.1414	33.9961	24.2955	30.9573	25.4573	19.4297	58.384	35.6657	27.3687	0.208466	0.999904	0.104913	0.183186	0.999971	-0.11102	1.9618e-07	0.000398703	-0.433978	NDH-M H PLASTOQUINONE DEHY, putative, expressed
LOC_Os02g06670	0.328295	0.4024	0.575726	0.145142	0.117583	0.235698	1.33893	2.98573	0.535784	0	0	0	0.000272383	0.301949	2.73862	0.0130736	0.999971	1.86707	3.95597e-07	0.000734921	3.81505	retrotransposon protein, putative, unclassified, expressed
LOC_Os11g34110	38.3337	6.47735	3.62677	17.1478	6.4288	1.74811	12.8906	3.75909	0.727797	29.3684	9.57863	3.1849	0.99513	0.999904	0.00128949	0.0160516	0.999971	-0.508646	4.21883e-07	0.000734921	-1.0687	heparan-alpha-glucosaminide N-acetyltransferase, putative, expressed
LOC_Os07g43200	0.28826	0.174053	0.0544738	0	0	0	0.270264	0.292966	0.104286	0	0	0	6.0376e-06	0.0136899	3.4888	1	1	6.28037e-16	6.0774e-07	0.000988103	3.84629	retrotransposon protein, putative, LINE subclass, expressed
LOC_Os01g29330	24.3502	31.1548	15.2509	20.1694	26.4158	10.1126	34.9836	39.6659	16.021	19.2953	24.1812	9.832	0.00389957	0.999904	0.307448	0.601791	0.999971	0.0555874	6.7618e-07	0.00103067	0.529223	expressed protein
LOC_Os02g52650	50.0883	19.2938	22.3512	34.9513	14.6413	19.8695	21.479	11.8704	13.9127	43.387	17.1843	20.177	0.214263	0.999904	0.120051	0.184051	0.999971	-0.128408	7.91966e-07	0.00113615	-0.477267	chlorophyll A-B binding protein, putative, expressed
LOC_Os01g08320	15.6845	7.4283	4.77768	8.00109	2.88083	2.40302	13.5583	11.1104	6.80544	8.38659	3.23896	3.39279	0.00039604	0.357727	0.597214	0.322648	0.999971	-0.166727	1.82275e-06	0.00246962	0.804467	OsIAA1 - Auxin-responsive Aux/IAA gene family member, expressed
LOC_Os01g52170	50	44.7612	44.7216	48.5044	40.3166	32.7362	28.1008	26.6349	29.2858	50.6482	37.3916	38.3684	0.202842	0.999904	0.106284	0.630332	0.999971	-0.0401653	2.145e-06	0.00271273	-0.395533	expressed protein
LOC_Os01g20206	36.6826	45.8246	66.9285	53.8118	61.5525	86.0207	79.3145	79.0468	97.2574	52.0272	48.8793	77.0802	0.021631	0.999904	-0.18538	0.116614	0.999971	0.12665	2.22465e-06	0.00271273	0.381922	methyltransferase, putative, expressed
LOC_Os01g21120	42.9385	25.1273	14.631	47.8891	22.2118	11.5404	74.3853	37.8915	22.2393	36.7208	27.8673	14.4741	0.839695	0.999904	0.0207961	0.556979	0.999971	-0.0603821	2.46406e-06	0.00280736	0.484331	AP2 domain containing protein, expressed
LOC_Os03g43990	6.86113	5.38135	6.20235	8.2858	4.83078	4.73767	6.16866	3.68433	3.39315	10.298	7.04818	5.59206	0.101548	0.999904	-0.190996	0.0312329	0.999971	-0.251267	2.53247e-06	0.00280736	-0.548879	BTBN8 - Bric-a-Brac, Tramtrack, Broad Complex BTB domain with non-phototropic hypocotyl 3 NPH3 and coiled-coil domains, expressed
LOC_Os04g34250	1.90912	2.40889	1.96941	2.50316	1.59771	1.16908	1.11323	1.19787	0.763658	2.60872	2.31	2.40515	0.41127	0.999904	-0.15656	0.0500998	0.999971	-0.373291	4.23741e-06	0.00449313	-0.876372	serine/threonine-protein kinase receptor precursor, putative, expressed
LOC_Os08g05780	7.05865	4.82547	7.15244	8.33494	3.78067	11.6627	10.1055	8.22401	19.7258	3.90123	3.88668	8.24194	0.238522	0.999904	0.221027	0.054602	0.999971	0.360418	4.6069e-06	0.00468138	0.859203	expressed protein
LOC_Os03g57200	11.3141	5.9087	17.9487	5.64928	2.72523	12.3982	8.09545	4.05342	20.0152	3.68572	2.07893	10.7026	6.00049e-09	4.878e-05	0.890051	0.065308	0.999971	0.282029	5.70994e-06	0.00557016	0.694208	glutathione S-transferase, putative, expressed
LOC_Os03g03034	45.8584	45.0676	24.5603	32.8208	16.4139	31.6036	36.1036	46.8604	41.6318	17.4793	7.20388	11.5901	3.97196e-05	0.0691915	1.18134	0.00434427	0.999971	0.819938	6.68511e-06	0.00627063	1.29472	flavonol synthase/flavanone 3-hydroxylase, putative, expressed
LOC_Os07g08460	8.06733	3.839	2.99042	2.78411	3.04087	1.97591	2.53663	0.942755	0.761289	5.94551	2.95776	2.46511	0.284597	0.999904	0.251358	0.181981	0.999971	-0.313521	9.36435e-06	0.00838804	-1.04094	OsIAA24 - Auxin-responsive Aux/IAA gene family member, expressed
LOC_Os02g07690	74.3538	103.256	102.483	91.8682	136.509	96.5734	114.293	151.259	119.159	79.3171	114.553	93.9962	0.679428	0.999904	-0.0277586	0.0778115	0.999971	0.118461	9.63035e-06	0.00838804	0.297259	VQ domain containing protein, putative, expressed
LOC_Os04g46970	2.84034	1.84156	4.00505	1.25574	1.47555	3.63751	3.5483	2.99951	4.72498	1.43598	1.49502	2.78587	0.00984729	0.999904	0.416091	0.794759	0.999971	0.0419348	1.01588e-05	0.00854322	0.711516	glucosyltransferase, putative, expressed
LOC_Os04g05050	0.71101	0.253836	0.4237	0.667599	0.288446	0.190806	0.656915	1.35117	0.535128	0.110771	0.191494	0.0156014	0.00131206	0.842066	1.62052	0.00595372	0.999971	1.38702	1.06018e-05	0.00861854	2.22125	pectate lyase precursor, putative, expressed
LOC_Os03g51760	0.188472	0.495034	0.241005	0.104157	0.093755	0.383387	0.42704	0.502589	1.31825	0	0.160052	0.020284	0.00210064	0.999904	1.9144	0.0280022	0.999971	1.36767	1.12111e-05	0.00877583	2.73401	OsFBX109 - F-box domain containing protein, expressed
LOC_Os10g28240	1.67486	0.88231	0.85564	1.22366	0.694766	1.30436	2.26729	2.27098	1.73733	1.10628	0.538385	0.953205	0.206141	0.999904	0.264564	0.285394	0.999971	0.223555	1.15149e-05	0.00877583	0.917963	calcium-transporting ATPase, plasma membrane-type, putative, expressed
LOC_Os08g07760	38.7795	35.7152	24.8578	38.3662	28.3882	22.7541	40.7297	46.75	27.8956	31.1102	25.0989	21.9248	0.00794424	0.999904	0.232391	0.152291	0.999971	0.125324	1.33901e-05	0.00977351	0.381153	BRASSINOSTEROID INSENSITIVE 1-associated receptor kinase 1 precursor, putative, expressed
LOC_Os05g45070	0.525867	0.460407	1.47297	0.258323	0.767334	2.55891	1.78726	4.47753	7.08377	0.750087	0.463108	0.905526	0.913213	0.999904	0.0426956	0.666506	0.999971	0.168824	1.36255e-05	0.00977351	1.70404	harpin-induced protein 1 domain containing protein, expressed
LOC_Os01g59420	0.275978	0.215198	0.118877	0.355931	0.189339	0.111547	0.106686	0	0	0.409429	0.132609	0.13748	0.972476	0.999904	-0.0200714	0.994614	0.999971	0.00392664	1.44745e-05	0.0100858	-2.52264	expressed protein
LOC_Os01g65880	38.9843	17.482	17.998	30.4031	19.268	14.5397	27.9465	13.1343	9.25163	34.7541	21.5212	17.553	0.825173	0.999904	-0.0230552	0.173456	0.999971	-0.142068	1.88799e-05	0.0126884	-0.446473	nodulin MtN3 family protein, putative, expressed
LOC_Os10g36000	150.388	96.5849	111.358	129.848	91.7241	93.3904	105.68	74.1015	83.2446	152.414	85.2807	131.971	0.788387	0.999904	-0.0200113	0.0562696	0.999971	-0.142323	1.92501e-05	0.0126884	-0.31861	remorin C-terminal domain containing protein, putative, expressed
LOC_Os10g01044	42.0581	14.2438	4.84085	13.975	12.031	3.33147	9.60288	4.51218	2.93192	31.5212	12.4944	6.28727	0.821229	0.999904	0.0523501	0.033463	0.999971	-0.492652	2.13882e-05	0.0134881	-0.984589	isoflavone reductase, putative, expressed
LOC_Os01g40290	0.666616	0.713332	1.29893	0.736792	0.618999	2.12709	1.63629	4.30374	3.02203	0.407507	0.251597	0.573946	0.0983662	0.999904	0.737048	0.0465803	0.999971	0.887448	2.15695e-05	0.0134881	1.89432	expressed protein
LOC_Os11g09680	86.7934	28.6391	22.0567	58.1581	22.3285	15.8013	43.5733	19.1084	17.6993	71.5769	27.5648	22.7608	0.448057	0.999904	0.0660741	0.00296208	0.999971	-0.258811	2.4685e-05	0.0150504	-0.367331	expressed protein
LOC_Os03g60080	82.0396	61.0021	66.7005	75.8083	59.6228	52.4809	105.467	76.8861	57.7947	59.4578	45.374	52.037	0.00279105	0.999904	0.288201	0.0665657	0.999971	0.176841	2.58603e-05	0.0153825	0.405539	NAC domain-containing protein 67, putative, expressed
LOC_Os02g35329	15.4874	5.37563	11.1384	15.3109	11.7344	17.5338	19.5782	16.9774	18.9134	12.276	5.61966	9.57283	0.533812	0.999904	0.112563	0.00392356	0.999971	0.521793	3.10691e-05	0.0180408	0.753585	RING-H2 finger protein ATL3F, putative, expressed
LOC_Os09g23740	8.88197	4.41238	4.2302	6.27488	4.1089	3.00593	4.77256	3.02517	3.05297	7.33077	4.17002	4.6729	0.597899	0.999904	0.0491834	0.0306336	0.999971	-0.201592	3.20799e-05	0.0181945	-0.387759	1-phosphatidylinositol-4-phosphate 5-kinase/ zinc ion binding protein, putative, expressed
LOC_Os04g58200	21.1327	2.10784	1.02619	10.1634	1.4571	0.336092	3.46618	1.21079	0.27864	31.9338	1.94983	1.04802	0.70935	0.999904	-0.119093	0.00818757	0.999971	-0.844873	3.54174e-05	0.0196309	-1.32136	protochlorophyllide reductase A, chloroplast precursor, putative, expressed
LOC_Os02g08018	25.7675	21.5461	19.3573	21.9521	13.8953	14.2593	24.9937	31.061	20.3853	17.0439	15.4075	14.1713	0.00275641	0.999904	0.35258	0.646719	0.999971	0.0539793	3.7231e-05	0.0201775	0.485707	calcium-transporting ATPase 9, plasma membrane-type, putative, expressed
LOC_Os01g64660	106.159	46.6692	77.1965	93.4009	31.7301	59.4798	49.3779	28.0816	54.349	100.845	43.2529	68.7164	0.468245	0.999904	0.0807992	0.116511	0.999971	-0.174845	4.20644e-05	0.0223015	-0.456257	fructose-1,6-bisphosphatase, putative, expressed
LOC_Os03g24590	34.674	17.8367	22.8718	30.0231	14.0673	19.276	19.7175	10.036	16.3569	36.867	14.9454	19.7767	0.379238	0.999904	0.0864352	0.333547	0.999971	-0.0950555	4.64443e-05	0.0240997	-0.400359	mTERF domain containing protein, expressed
LOC_Os05g11064	16.3829	8.312	2.58809	7.5605	6.65532	2.1322	4.96409	3.46438	1.56076	13.8617	6.7805	2.16926	0.270655	0.999904	0.181592	0.199037	0.999971	-0.211717	4.76349e-05	0.0242025	-0.670435	expressed protein
LOC_Os07g09800	36.732	30.5251	38.4353	32.8471	28.8239	25.3211	22.5503	16.6132	23.5272	33.3116	27.0225	30.5613	0.109575	0.999904	0.149084	0.638424	0.999971	-0.0437816	5.64338e-05	0.0280879	-0.375224	expressed protein
LOC_Os08g16830	11.498	3.27616	5.74195	7.29421	2.1931	2.73538	2.89041	1.89066	3.80694	9.79461	4.46803	8.03979	0.489494	0.999904	-0.161442	0.00324004	0.999971	-0.687708	6.61543e-05	0.0322674	-0.931983	retrotransposon protein, putative, SINE subclass, expressed
LOC_Os10g01134	104.818	91.4585	103.69	99.2867	89.9874	123.055	112.361	122.3	127.738	88.5191	82.0917	111.074	0.296468	0.999904	0.0689775	0.111801	0.999971	0.105058	6.97128e-05	0.0333364	0.26277	OsSCP46 - Putative Serine Carboxypeptidase homologue, expressed
LOC_Os04g57810	62.5645	69.3966	106.397	57.9035	80.9478	122.241	76.9011	90.3091	119.386	53.8107	66.1821	106.905	0.336094	0.999904	0.0640181	0.0377351	0.999971	0.138278	7.6555e-05	0.0359043	0.263213	GA18008-PA, putative, expressed
LOC_Os02g48190	20.318	23.7786	29.2487	20.3388	24.7369	38.8648	23.2167	33.404	45.0405	19.6701	22.3173	34.0378	0.79434	0.999904	-0.0190327	0.209216	0.999971	0.0916828	8.5629e-05	0.0394023	0.286796	expressed protein
LOC_Os04g03980	1.03526	0.258968	0.351216	0.190707	0.132425	0.21236	0.0837746	0	0	0.745871	0.0976829	0.222835	0.37765	0.999904	0.556717	0.566655	0.999971	-0.361571	8.87587e-05	0.040086	-2.47328	flavin monooxygenase, putative, expressed
LOC_Os03g10950	12.4396	12.5897	13.5406	13.3392	15.0727	16.4485	13.5756	19.7734	20.5211	12.8978	11.4521	12.3623	0.605527	0.999904	0.0493738	0.0365769	0.999971	0.199845	0.000101546	0.0445867	0.37158	protein phosphatase 2C, putative, expressed
LOC_Os09g07460	2.35754	4.36896	2.0672	2.30173	2.88498	3.21592	4.80755	7.18012	5.13008	1.87354	3.31449	3.04471	0.839015	0.999904	0.0390049	0.826021	0.999971	0.0422025	0.000102381	0.0445867	0.745887	kelch repeat protein, putative, expressed
LOC_Os09g24590	31.2651	24.0299	11.183	29.6764	21.3702	9.55269	35.0823	29.8455	22.2575	16.3588	18.9164	11.1348	0.0736747	0.999904	0.296313	0.251473	0.999971	0.189981	0.0001115	0.0477061	0.640146	expressed protein
LOC_Os07g38350	0.725888	0.427873	0.356252	0.183869	0.147136	0.206056	0	0	0.0494476	0.878182	0.143947	0.308049	0.667438	0.999904	0.332699	0.417538	0.999971	-0.627741	0.000119752	0.0503536	-2.97852	retrotransposon protein, putative, Ty1-copia subclass, expressed
LOC_Os04g11390	95.9039	148.541	68.1747	90.8333	109.61	64.6018	94.0916	149.432	61.9675	67.7638	115.041	46.2102	2.21783e-05	0.0416066	0.330056	0.0121177	0.999971	0.195205	0.00012732	0.0526285	0.298141	expressed protein
LOC_Os07g11280	31.4653	20.8893	8.99586	21.2268	21.5978	7.99579	17.7789	11.476	6.58198	28.5736	19.5451	8.21597	0.432658	0.999904	0.0840651	0.497015	0.999971	-0.0727666	0.000153462	0.0623772	-0.405555	pentatricopeptide containing protein, putative, expressed
LOC_Os03g62670	41.2401	21.4578	73.9248	48.8247	16.8633	35.6751	29.2788	14.1767	45.2983	73.2537	28.9004	65.4697	0.152647	0.999904	-0.250546	0.00329603	0.999971	-0.514791	0.000159013	0.0635738	-0.661566	expressed protein
LOC_Os06g27720	0.199388	0.294383	0.13101	0.42513	0.641561	0.170966	0.134662	0.0224888	0	0.521217	0.317803	0.284687	0.335778	0.999904	-0.577187	0.996692	0.999971	0.00248638	0.000164103	0.0645508	-2.2599	retrotransposon protein, putative, unclassified, expressed
LOC_Os07g28090	15.8129	6.89941	6.84501	10.4596	7.51822	5.77008	8.5138	4.77561	4.15719	12.8409	7.83939	5.32455	0.276468	0.999904	0.110021	0.596968	0.999971	-0.0534557	0.000167916	0.0650023	-0.380417	ABC transporter, ATP-binding protein, putative, expressed
LOC_Os03g61890	24.9474	17.1992	23.4867	23.6206	14.4223	18.447	16.8062	12.6979	19.5452	25.1596	15.4574	23.6712	0.668316	0.999904	0.0297184	0.0711116	0.999971	-0.12518	0.000177966	0.0667745	-0.259993	chloroplast protein import component Toc159, putative, expressed
LOC_Os11g31190	5.39108	4.95899	3.51543	1.09367	0.733246	2.25372	0	0	0	0.0312874	0.19317	0.0881324	2.86528e-14	6.98785e-10	3.81873	5.52884e-07	0.00674187	2.51443	0.00017797	0.0667745	-1.88238	nodulin MtN3 family protein, putative, expressed
LOC_Os09g31486	73.5102	108.944	127.699	75.8313	95.3215	148.642	82.9035	124.355	171.093	65.8621	89.2337	143.304	0.337583	0.999904	0.0642706	0.214394	0.999971	0.0832123	0.000188965	0.0698159	0.250214	DnaK family protein, putative, expressed
LOC_Os06g42850	10.5985	13.0223	32.3243	12.7329	16.1375	30.3264	8.09171	11.9	25.6053	11.6903	16.102	36.1535	0.115512	0.999904	-0.141091	0.760459	0.999971	-0.0273306	0.000191802	0.0698159	-0.334336	extracellular ligand-gated ion channel, putative, expressed
LOC_Os04g14490	0.176317	0.570831	0.149429	0.170374	0.272572	0.356386	0.0588178	0	0	0.446735	0.23198	0.226138	0.844913	0.999904	-0.135447	0.87579	0.999971	-0.108232	0.000217147	0.0778792	-2.56072	retrotransposon protein, putative, Ty3-gypsy subclass, expressed
LOC_Os05g42060	5.81573	1.09322	4.90891	5.86365	1.94887	4.25305	2.34205	0.930487	3.13433	6.65296	2.02891	4.44029	0.265364	0.999904	-0.215729	0.727215	0.999971	-0.0675645	0.000222187	0.078532	-0.715163	UDP-glucoronosyl/UDP-glucosyl transferase, putative, expressed
LOC_Os02g54180	1.46234	1.96971	0.739757	0.24866	0.872927	0.888364	7.07279	6.25192	2.36035	1.54721	0.827886	0.435827	0.362394	0.999904	0.421033	0.488078	0.999971	-0.320517	0.000250046	0.0871161	1.6929	expressed protein
LOC_Os02g22100	167.386	107.572	62.6762	130.079	71.1953	45.6595	84.9664	58.9511	53.1456	157.968	93.2108	62.393	0.543043	0.999904	0.0681375	0.0220208	0.999971	-0.256545	0.000261239	0.0892193	-0.409013	OsRhmbd6 - Putative Rhomboid homologue, expressed
LOC_Os03g06570	0.161676	0.226481	0.389853	0.50035	0.0386042	0.208935	0	0	0.0376941	0.355802	0.292899	0.271441	0.770013	0.999904	-0.213642	0.446585	0.999971	-0.556194	0.0002634	0.0892193	-2.66643	IQ calmodulin-binding motif family protein, putative, expressed
LOC_Os12g10580	30.7196	50.7304	70.6752	20.2919	43.1894	65.418	16.0277	40.5226	59.7635	23.7968	57.8653	80.9416	0.963164	0.999904	-0.0044198	0.0218371	0.999971	-0.219461	0.000280912	0.0938478	-0.347615	ribulose bisphosphate carboxylase large chain precursor, putative, expressed
LOC_Os07g43120	1.19722	0.982958	0.37562	0.876492	0.334874	0.189225	0.366489	0.0978145	0	0.913668	0.510755	0.239221	0.402498	0.999904	0.450825	0.676382	0.999971	-0.224777	0.000286413	0.0943924	-1.95333	transposon protein, putative, unclassified, expressed
LOC_Os04g41340	221.138	112.216	180.065	242.279	76.7686	134.877	104.925	51.1058	119.06	257.085	92.1744	140.984	0.523754	0.999904	0.0964809	0.536962	0.999971	-0.0934308	0.000295011	0.0959298	-0.547746	4-nitrophenylphosphatase, putative, expressed
LOC_Os04g12530	12.0141	11.188	9.098	12.3132	6.38932	5.01848	10.2081	4.59869	2.80105	16.5248	8.47115	8.46327	0.96044	0.999904	0.00991693	0.0702135	0.999971	-0.361979	0.000299268	0.0960334	-0.722933	amino acid transporter family protein, putative, expressed
LOC_Os05g33490	0.0338595	0.0438052	0.0775469	0.0521327	0.0442637	0	0	0	0	0.148367	0.0288718	0.0406103	0.860413	0.999904	-0.138469	0.182897	0.999971	-1.04877	0.000310562	0.0978543	-2.83975	retrotransposon protein, putative, Ty3-gypsy subclass, expressed
LOC_Os11g15170	0.165953	0.141234	0.0359699	0.267659	0.115663	0.0433427	0.0963456	0.0664144	0	0.29475	0.18472	0.157869	0.164052	0.999904	-0.741616	0.267339	0.999971	-0.591137	0.000316671	0.0978543	-1.91924	transposon protein, putative, unclassified, expressed
LOC_Os02g47020	778.1	354.924	413.079	448.124	270.225	352.248	287.086	169.472	316.115	682.307	302.391	366.185	0.349589	0.999904	0.136915	0.197807	0.999971	-0.188503	0.000319929	0.0978543	-0.526738	phosphoribulokinase/Uridine kinase family protein, expressed
LOC_Os01g62290	12.5638	18.4018	81.7415	8.20616	17.9188	83.4963	14.6157	26.2003	94.8962	10.9362	15.5794	65.645	0.113624	0.999904	0.174344	0.763291	0.999971	0.0331872	0.000320992	0.0978543	0.396461	DnaK family protein, putative, expressed
LOC_Os11g18570	23.2221	45.7579	40.59	31.2371	39.758	32.165	23.3747	41.6899	33.5949	39.9577	51.7521	51.477	0.00549489	0.999904	-0.30147	0.00279793	0.999971	-0.324555	0.00033916	0.102116	-0.389083	cytochrome P450, putative, expressed
LOC_Os03g21419	5.52828	0.522604	0.738723	3.40731	0.630473	0.524984	1.49568	0.511599	0.307805	5.68851	0.863279	0.60548	0.638015	0.999904	-0.109952	0.171743	0.999971	-0.319384	0.000351957	0.104677	-0.835187	retrotransposon protein, putative, Ty1-copia subclass, expressed
LOC_Os06g12900	0.034199	0	0	0	0	0	0	0	0	0.353089	0.856659	1.18341	0.00187297	0.999904	-4.06874	0.00035883	0.972349	-4.66927	0.00035883	0.105435	-4.66927	transposon protein, putative, unclassified, expressed
LOC_Os05g30070	0.0438113	0.0594769	0	0.0509045	0.033963	0.0152762	0	0	0	0.138329	0.0540735	0.148587	0.0905988	0.999904	-1.49739	0.200292	0.999971	-1.13325	0.000368054	0.106727	-3.15184	retrotransposon protein, putative, unclassified, expressed
LOC_Os03g12530	20.348	21.5791	32.4175	24.0325	17.4941	18.7134	18.5132	12.3395	14.6677	24.7883	21.179	35.0434	0.587383	0.999904	-0.0859196	0.0759719	0.999971	-0.28098	0.000371979	0.106727	-0.56356	cation efflux family protein, putative, expressed
LOC_Os04g45180	12.3416	13.3164	11.4313	11.6235	13.1519	12.4485	8.34477	10.1733	6.18031	11.9145	13.0638	12.6838	0.890826	0.999904	-0.0169355	0.9343	0.999971	-0.0101713	0.000397523	0.11273	-0.436991	EF hand family protein, expressed
LOC_Os02g56700	0.466229	0.530225	0.694358	0.483103	0.104366	0.271966	0.792287	1.3496	0.509528	0.133598	0.0494905	0.280219	0.00548367	0.999904	1.40871	0.230059	0.999971	0.608801	0.00041284	0.114756	1.79146	dehydrogenase, putative, expressed
LOC_Os08g05910	26.0319	29.5141	25.6879	27.2051	19.037	22.3775	24.9602	34.5156	32.8412	17.1237	17.8427	22.4937	0.00918008	0.999904	0.35104	0.191117	0.999971	0.176146	0.000419363	0.114756	0.475314	peptide transporter PTR2, putative, expressed
LOC_Os01g46090	0.553091	0.645657	0.875648	0.271696	0.440652	0.705938	0	0.310505	0	0.676217	0.730626	0.357152	0.775424	0.999904	0.180439	0.717746	0.999971	-0.228625	0.000422869	0.114756	-2.22974	GDSL-like lipase/acylhydrolase, putative, expressed
LOC_Os08g41780	22.3401	26.0956	12.7115	16.0938	16.5165	14.0341	27.1654	37.6252	15.5126	17.2189	20.8265	11.3162	0.123282	0.999904	0.200156	0.841247	0.999971	-0.0260139	0.00042349	0.114756	0.457809	triacylglycerol lipase precursor, putative, expressed
LOC_Os11g02660	13.1273	7.3449	3.34124	7.21719	7.09068	2.22049	6.24064	4.46211	1.06664	9.69161	6.16708	3.38357	0.390486	0.999904	0.154599	0.292512	0.999971	-0.189505	0.000438925	0.117214	-0.632899	hydrolase, alpha/beta fold family domain containing protein, expressed
LOC_Os02g40410	1.35776	0.471112	0.320167	1.25069	0.412982	0.311607	2.48197	4.09111	0.413729	0.634386	0.182781	0.240229	0.166384	0.999904	0.652843	0.222086	0.999971	0.575989	0.000442172	0.117214	1.65746	expressed protein
LOC_Os07g20100	6.88651	5.15131	1.85025	5.54525	4.60539	3.43321	1.38427	3.06033	0.523976	4.32617	4.67338	3.49824	0.942193	0.999904	-0.023141	0.819053	0.999971	0.0730037	0.000460774	0.117548	-1.11776	expressed protein
LOC_Os04g55710	42.9266	150.795	435.511	73.4513	155.562	252.507	40.0397	71.5727	180.748	79.4816	179.976	324.524	0.422177	0.999904	-0.166636	0.451042	0.999971	-0.156469	0.000461585	0.117548	-0.727065	transposon protein, putative, unclassified, expressed
LOC_Os09g04440	39.6905	34.1921	52.9703	43.1203	36.8853	40.4708	27.3284	27.3864	29.4435	43.257	31.3574	41.8848	0.381102	0.999904	0.0779926	0.623891	0.999971	0.0436631	0.000462059	0.117548	-0.311825	DNA-binding protein, putative, expressed
LOC_Os07g07540	154.414	69.353	134.099	144.061	59.0489	106.982	76.3788	40.5738	103.281	151.265	70.2729	109.845	0.574542	0.999904	0.0685382	0.50699	0.999971	-0.0810106	0.000462712	0.117548	-0.427493	SHOOT1 protein, putative, expressed
LOC_Os09g34250	1.27767	1.67342	5.35705	2.02202	0.717169	4.68523	1.48482	1.54056	6.30236	0.826238	0.494666	2.85635	0.00161008	0.981665	0.752667	0.0145303	0.999971	0.583191	0.000479974	0.120676	0.833233	UDP-glucoronosyl and UDP-glucosyl transferase domain containing protein, expressed
LOC_Os12g40550	78.4934	79.4529	73.9377	72.7609	87.1998	89.7978	94.4561	94.2777	90.3461	67.7319	76.7121	78.2377	0.53147	0.999904	0.041571	0.0846269	0.999971	0.114559	0.000496796	0.122931	0.231349	peptidase, putative, expressed
LOC_Os08g43230	33.474	24.4983	24.6491	18.6901	22.5377	19.7166	13.0818	16.7892	14.1163	26.4114	23.8232	18.0687	0.120543	0.999904	0.191239	0.405222	0.999971	-0.102528	0.000499022	0.122931	-0.428829	TraB family protein, putative, expressed
LOC_Os05g36994	75.7164	90.8332	39.0066	74.0074	69.7465	36.4225	54.8522	43.387	30.0135	71.5508	68.4361	36.9393	0.136914	0.999904	0.13093	0.865342	0.999971	0.0149275	0.000512849	0.125074	-0.305802	expressed protein
LOC_Os02g04090	0.356283	0.147324	1.12769	0.757918	0.302468	0.475039	0	0.0629316	0	0.388574	0.362914	0.374646	0.936501	0.999904	0.0546749	0.733992	0.999971	0.233211	0.000534611	0.127424	-2.37643	retrotransposon protein, putative, unclassified, expressed
LOC_Os05g31620	7.51794	8.15169	15.9097	7.28669	10.4599	20.0952	10.7119	17.5316	25.5501	7.10577	9.78923	17.2899	0.600412	0.999904	-0.0702363	0.538479	0.999971	0.0824795	0.000537957	0.127424	0.464093	OsCML15 - Calmodulin-related calcium sensor protein, expressed
LOC_Os08g39370	35.9431	20.9398	52.8947	47.7406	19.9669	34.0645	30.9506	11.5926	37.1216	57.2295	22.6692	50.5397	0.274634	0.999904	-0.166712	0.128217	0.999971	-0.232135	0.000549776	0.127424	-0.527282	citrate transporter, putative, expressed
LOC_Os06g40180	0.783407	0.769836	1.01328	0.765057	0.668983	0.862093	0.296418	0.378623	0.504292	0.892431	0.894983	1.32793	0.511013	0.999904	-0.182741	0.300573	0.999971	-0.287823	0.000552394	0.127424	-0.960323	phospholipase D, putative, expressed
LOC_Os01g43230	10.7219	5.24713	2.42563	7.61172	1.87742	2.65382	5.36858	2.32556	1.32419	18.1909	3.6279	3.05233	0.585813	0.999904	-0.129876	0.0207943	0.999971	-0.550975	0.000555504	0.127424	-0.822867	expressed protein
LOC_Os03g33100	0.174856	0.194613	0.0757902	0.279065	0.121285	0.0508961	0.10532	0.0396291	0	0.227574	0.184866	0.114543	0.698242	0.999904	-0.199783	0.534316	0.999971	-0.320231	0.000563521	0.127424	-1.7771	retrotransposon protein, putative, unclassified, expressed
LOC_Os01g66310	3.54248	3.10152	0.517701	1.56616	3.5244	1.01733	0	1.78988	0	2.81521	2.67404	1.83001	0.6886	0.999904	-0.256484	0.66556	0.999971	-0.27664	0.000574909	0.127424	-2.20364	expressed protein
LOC_Os02g42220	43.7124	33.2883	19.6393	37.7422	31.2662	18.0575	37.2817	22.8808	15.7515	41.968	32.9997	20.3313	0.949082	0.999904	0.0045025	0.197721	0.999971	-0.090817	0.000576854	0.127424	-0.242701	transposon protein, putative, unclassified, expressed
LOC_Os01g40710	81.8281	59.6093	44.1874	53.8292	54.0212	39.7221	42.6387	38.8161	35.6581	66.0499	53.8673	40.7789	0.126284	0.999904	0.131422	0.389895	0.999971	-0.0739069	0.000578647	0.127424	-0.295817	high light inducible protein, putative, expressed
LOC_Os08g07720	6.48234	7.02811	18.9957	8.72392	8.34058	25.5848	5.8218	7.35379	26.9769	5.0201	3.61285	16.6785	0.00754078	0.999904	0.349018	3.43739e-06	0.0279437	0.606451	0.000579956	0.127424	0.449447	transferase family protein, putative, expressed
LOC_Os07g26000	56.766	38.7049	20.9682	52.1048	34.5978	20.2651	45.8393	26.1251	15.2779	55.1373	33.433	20.7532	0.381822	0.999904	0.0614991	0.849767	0.999971	-0.01332	0.000579958	0.127424	-0.241963	OsFBX235 - F-box domain containing protein, expressed
LOC_Os06g49120	23.5388	13.4377	30.0113	25.2923	13.7089	23.6454	11.8017	11.2321	16.8124	27.3112	13.3197	24.8483	0.906058	0.999904	0.0158796	0.820795	0.999971	-0.0304807	0.00058569	0.127534	-0.462635	Complex I intermediate-associated protein 30 domain containing protein, putative, expressed
LOC_Os04g38950	69.3532	58.3402	58.8239	74.2114	52.8141	55.8316	72.7371	75.3499	71.7905	66.3467	55.0635	51.6969	0.291902	0.999904	0.0766293	0.481987	0.999971	0.0511205	0.000634323	0.136901	0.248401	class I glutamine amidotransferase, putative, expressed
LOC_Os07g06970	30.1464	28.6423	12.667	14.9849	11.7296	11.0201	9.66736	13.5167	9.78214	4.90155	6.39062	5.24512	3.79895e-12	4.63244e-08	1.39809	4.28169e-05	0.174036	0.823766	0.000643041	0.137566	0.687076	HEN1, putative, expressed
LOC_Os01g41910	7.71161	5.04063	6.02085	10.5083	4.82406	4.2472	5.02648	3.78073	1.53932	9.29917	5.56195	5.21844	0.824254	0.999904	-0.047838	0.735257	0.999971	-0.0728398	0.000678947	0.143984	-0.731959	receptor-like protein kinase 5 precursor, putative, expressed
LOC_Os08g27010	200.949	122.805	149.708	204.931	100.886	113.872	131.742	82.6286	108.853	188.829	112.086	120.289	0.0947995	0.999904	0.123658	0.745421	0.999971	-0.024033	0.000694079	0.14431	-0.251069	APE1, putative, expressed
LOC_Os09g31478	68.298	68.6501	66.5064	66.7433	82.5441	99.8482	87.5994	85.7746	89.492	63.0041	55.5205	74.6798	0.533621	0.999904	0.0585695	0.00782294	0.999971	0.250242	0.00069942	0.14431	0.318945	auxin efflux carrier component, putative, expressed
LOC_Os05g34830	49.3098	85.6324	103.02	54.9613	81.2949	122.421	60.6602	98.2016	128.491	44.1435	75.4593	117.085	0.594013	0.999904	0.035944	0.0887591	0.999971	0.11477	0.000701863	0.14431	0.228522	No apical meristem protein, putative, expressed
LOC_Os06g13660	111.115	74.5182	70.965	86.2337	66.6467	56.8296	70.4128	51.4063	55.3449	101.734	65.6045	59.8848	0.0554064	0.999904	0.128012	0.328876	0.999971	-0.0652452	0.000704459	0.14431	-0.226387	alanyl-tRNA synthetase, putative, expressed
LOC_Os08g07540	88.9408	67.2647	54.2588	79.2654	65.1091	50.5969	62.9553	45.9684	42.6002	83.2133	65.3832	45.7142	0.193798	0.999904	0.0883117	0.788064	0.999971	0.0182699	0.000710988	0.14431	-0.230073	hemimethylated DNA binding domain containing protein, expressed
LOC_Os07g10050	2.32551	1.45126	1.15867	2.56762	1.89548	1.05721	1.29379	1.08628	0.411556	2.45995	1.21097	1.34901	0.959881	0.999904	-0.00951513	0.655875	0.999971	0.0842912	0.000721078	0.14431	-0.639621	retrotransposon protein, putative, unclassified, expressed
LOC_Os03g55290	1.87169	1.96644	3.79522	1.65498	0.83796	8.53295	7.3155	5.59533	6.76383	1.54464	0.317889	3.56543	0.177383	0.999904	0.655949	0.208777	0.999971	0.611248	0.000722412	0.14431	1.64414	GASR3 - Gibberellin-regulated GASA/GAST/Snakin family protein precursor, expressed
LOC_Os04g51786	9.66972	7.2566	6.34748	5.93108	7.23113	6.63719	4.96579	5.23471	3.96388	8.81804	7.79047	7.71937	0.715007	0.999904	-0.0583711	0.200467	0.999971	-0.204656	0.000727821	0.14431	-0.540147	containing DUF163, putative, expressed
LOC_Os02g40010	1.28422	1.54873	2.84033	1.90084	2.37773	1.44638	0.818368	2.1178	0.748517	2.74845	3.40076	3.04062	0.0750505	0.999904	-0.533338	0.10678	0.999971	-0.483209	0.000741701	0.145876	-1.01076	phosphoribosyl transferase, putative, expressed
LOC_Os08g01140	7.77574	4.60465	7.05637	8.4607	4.04813	4.37393	5.20942	2.99859	4.45786	10.355	4.705	7.19455	0.489341	0.999904	-0.109324	0.0761801	0.999971	-0.28041	0.000749386	0.146208	-0.533031	cytochrome b561, putative, expressed
LOC_Os06g45770	0.871847	1.10617	0.407444	0.596387	0.867288	0.0978284	0.0953883	0.118935	0	0.599259	0.940162	0.402635	0.780812	0.999904	0.177167	0.485907	0.999971	-0.44367	0.000762847	0.146527	-2.14307	BTB/POZ domain containing protein, putative, expressed
LOC_Os02g06300	71.1627	43.761	38.3451	55.6764	45.2914	30.8772	45.0011	34.4207	29.7787	66.6826	41.0109	34.8858	0.29362	0.999904	0.0743786	0.353853	0.999971	-0.0656623	0.000763308	0.146527	-0.238372	GTP-binding protein lepA, putative, expressed
LOC_Os10g28600	40.6958	28.6538	16.9539	33.2917	26.6312	14.2632	26.6721	21.1429	14.7277	37.6597	27.2628	16.5495	0.473324	0.999904	0.0500383	0.16719	0.999971	-0.096387	0.000769044	0.146527	-0.234721	PPR repeat domain containing protein, putative, expressed
LOC_Os11g05700	73.5398	105.69	94.2586	64.5303	103.132	108.871	79.4932	126.915	95.8021	53.686	77.1204	92.2117	0.020094	0.999904	0.216802	0.0207953	0.999971	0.215598	0.000777888	0.147063	0.31342	ABC transporter family protein, putative, expressed
LOC_Os04g12499	47.4627	26.7514	23.562	25.2285	24.1509	12.7892	31.4003	16.3738	14.3601	39.7562	28.5797	25.0335	0.901568	0.999904	0.0164037	0.00121775	0.999971	-0.429015	0.00078893	0.147829	-0.44519	amino acid transporter protein, putative, expressed
LOC_Os08g39430	48.0697	13.7817	3.52484	17.4918	13.438	2.97722	14.3816	6.62781	2.56504	40.8963	13.5112	4.09865	0.962846	0.999904	0.0102035	0.0765986	0.999971	-0.387873	0.000794062	0.147829	-0.734854	thylakoid lumenal 19 kDa protein, chloroplast precursor, putative, expressed
LOC_Os08g41080	2.68757	1.20831	0.477686	0.963406	0.695903	0.365047	0.370308	0.122335	0	1.66514	0.618838	0.891187	0.778992	0.999904	0.17367	0.497704	0.999971	-0.419647	0.000808718	0.149417	-2.07303	expressed protein
LOC_Os04g25490	1.09635	1.7155	17.111	1.86672	2.49534	10.5382	0.533374	1.30501	8.42174	1.16125	3.59858	16.906	0.286743	0.999904	-0.261134	0.624516	0.999971	-0.119981	0.00082407	0.150033	-0.819854	cytokinin-O-glucosyltransferase 2, putative, expressed
LOC_Os07g46990	290.119	303.712	348.245	289.693	329.199	413.276	319.879	354.113	442.888	273.109	277.001	344.493	0.416298	0.999904	0.0539969	0.0351821	0.999971	0.139915	0.000827018	0.150033	0.222109	copper/zinc superoxide dismutase, putative, expressed
LOC_Os07g49114	7.51794	4.7764	17.7927	4.9268	4.72603	31.7162	6.67046	8.06765	28.9286	3.78236	3.65354	16.8408	0.0782707	0.999904	0.334245	0.0422894	0.999971	0.385469	0.000830511	0.150033	0.634474	wound-induced protein WI12, putative, expressed
LOC_Os02g30920	69.8842	29.1357	21.8848	36.7815	26.8177	22.6974	11.3103	4.20353	5.819	61.0296	36.738	13.9678	0.801088	0.999904	0.112222	0.802664	0.999971	-0.111314	0.000854095	0.153159	-1.48535	hypothetical protein
LOC_Os03g22120	93.7086	74.6371	93.3092	86.8234	82.1615	108.695	97.7137	102.639	112.477	76.1965	82.4222	92.9594	0.584018	0.999904	0.0367008	0.149394	0.999971	0.0966359	0.000861222	0.15331	0.223367	sucrose synthase, putative, expressed
LOC_Os02g55030	26.5258	33.3238	30.3419	24.1074	33.3282	37.6543	31.1076	36.1964	37.5451	23.7689	28.9492	31.3692	0.293225	0.999904	0.0719376	0.0941531	0.999971	0.114564	0.000871738	0.154058	0.22784	hydrolase, NUDIX family, domain containing protein, expressed
LOC_Os02g38020	51.3217	20.6312	26.1152	30.8337	17.7312	24.3895	20.7061	13.3973	20.8806	43.8162	18.7555	25.8766	0.500483	0.999904	0.0870791	0.235024	0.999971	-0.153486	0.000889912	0.156138	-0.429521	inorganic phosphate transporter 2-1, chloroplast precursor, putative, expressed
LOC_Os11g18366	10.4153	8.38421	5.19578	7.00207	5.16444	5.59542	7.71663	5.11782	3.3766	12.3368	10.8193	5.01918	0.417645	0.999904	-0.130227	0.013576	0.999971	-0.396584	0.00089932	0.156304	-0.533473	cycloartenol synthase, putative, expressed
LOC_Os03g17174	82.9875	17.2661	4.55753	21.7583	18.8514	2.17529	16.9649	6.43151	0.190519	41.3969	18.878	3.99696	0.617553	0.999904	0.245099	0.3992	0.999971	-0.413823	0.000903678	0.156304	-1.62914	PsbP, putative, expressed
LOC_Os12g13380	52.0081	55.6475	64.4655	45.1982	61.9806	91.0036	67.682	81.3132	98.2563	48.8784	60.3557	80.1163	0.3485	0.999904	-0.079246	0.746857	0.999971	0.0272848	0.000939638	0.160046	0.279622	adenylate kinase, putative, expressed
LOC_Os02g55120	112.701	72.5033	57.1045	79.6715	79.0197	48.1836	70.2465	51.1472	41.2755	99.099	72.2064	48.2069	0.232238	0.999904	0.100244	0.62696	0.999971	-0.0407827	0.000943385	0.160046	-0.277492	translation initiation factor IF-3, putative, expressed
LOC_Os01g13120	16.572	2.36646	1.40842	5.68107	1.37542	0.572621	4.21671	1.19403	0.568189	11.0109	2.23262	1.3448	0.48314	0.999904	0.170082	0.00685124	0.999971	-0.655817	0.000945	0.160046	-0.801926	aquaporin protein, putative, expressed
LOC_Os12g29400	20.0335	18.7279	27.2702	15.214	22.1815	38.9732	23.7209	25.2509	47.8373	16.4737	16.1711	33.0921	0.682398	0.999904	0.0490874	0.259556	0.999971	0.135249	0.000955891	0.160462	0.396256	GRAM domain containing protein, expressed
LOC_Os11g10510	1.5306	1.524	1.34867	1.12782	1.43759	1.46519	4.11579	3.22246	1.50438	0.935666	1.74267	0.979835	0.380678	0.999904	0.222829	0.601973	0.999971	0.132573	0.000960613	0.160462	0.839264	dehydrogenase, putative, expressed
LOC_Os06g40640	212.388	130.84	114.062	158.695	96.3222	92.7901	116.242	73.0326	103.688	173.096	124.968	118.493	0.51028	0.999904	0.070352	0.0677688	0.999971	-0.195171	0.000974098	0.161607	-0.352389	fructose-bisphospate aldolase isozyme, putative, expressed
LOC_Os02g38240	87.8682	44.7235	15.342	39.0077	35.2566	13.9405	27.7027	20.7355	12.9344	66.4061	37.8104	18.6837	0.653127	0.999904	0.0832276	0.109928	0.999971	-0.296026	0.00098783	0.161834	-0.610003	rhodanese family protein, putative, expressed
LOC_Os06g15730	35.4071	20.2076	10.4279	30.131	16.3017	8.16853	22.5713	10.3254	7.68381	26.4445	16.7009	10.1028	0.0608989	0.999904	0.170903	0.714853	0.999971	-0.0333144	0.000988736	0.161834	-0.30034	expressed protein
LOC_Os01g09540	187.646	54.9992	10.7847	98.3904	44.2017	3.85073	69.4408	32.7537	5.66766	141.459	58.2832	17.0431	0.747272	0.999904	-0.0779286	0.00351757	0.999971	-0.705788	0.00106223	0.172704	-0.791649	HAD superfamily phosphatase, putative, expressed
LOC_Os08g34780	0.0270284	0.127009	0.112453	0.126206	0.381282	0.487294	0	0.18971	0	0.101853	0.408789	0.307666	0.122779	0.999904	-1.06726	0.77785	0.999971	0.195111	0.00107062	0.172915	-2.26236	adenylyl cyclase-associated protein, putative, expressed
LOC_Os04g50120	46.9429	38.9078	45.1546	62.8859	48.9004	45.4352	69.0834	52.0898	57.9945	52.5109	44.8985	45.0185	0.228985	0.999904	-0.0844993	0.18241	0.999971	0.0936584	0.00110531	0.177344	0.229147	zinc-binding protein, putative, expressed
LOC_Os04g25120	0.592407	0.531805	0.607292	0.399699	0.755779	0.14288	0	0.406442	0	0.44075	0.67381	0.424574	0.868089	0.999904	0.135488	0.677164	0.999971	-0.339636	0.00112957	0.180051	-2.65623	expressed protein
LOC_Os05g35160	0.378148	0.354725	0.17763	0.0895622	0.225731	0.0581765	0	0.0909824	0	0.42105	0.152917	0.174418	0.733489	0.999904	0.236866	0.324767	0.999971	-0.685029	0.00114591	0.181471	-2.26231	clathrin assembly protein, putative, expressed
LOC_Os08g13630	14.2795	11.9953	9.11074	12.6579	10.6482	6.60465	9.78224	8.85266	5.30428	11.9672	11.8448	8.31095	0.328939	0.999904	0.0932156	0.339268	0.999971	-0.0912447	0.00117669	0.185143	-0.309792	expressed protein
LOC_Os08g40919	21.1191	10.8607	3.37581	16.558	11.0967	4.019	10.4601	7.52234	2.74913	17.7505	8.834	3.93709	0.481043	0.999904	0.0750965	0.562727	0.999971	0.061686	0.00119444	0.185857	-0.345329	expressed protein
LOC_Os10g18340	1260.87	753.153	371.053	954.823	597.705	280.295	853.478	547.798	313.831	1122.5	720.972	361.512	0.37829	0.999904	0.0615498	0.00435563	0.999971	-0.199183	0.00120386	0.185857	-0.226203	expressed protein
LOC_Os05g51670	150.611	167.724	257.367	128.871	181.041	343.096	172.54	201.632	371.209	144.622	149.728	265.344	0.629855	0.999904	0.0407475	0.183052	0.999971	0.112572	0.00120409	0.185857	0.273766	NAD dependent epimerase/dehydratase family protein, putative, expressed
LOC_Os04g16830	15.8489	11.1812	8.81289	11.2186	12.6621	9.28152	9.96587	9.79667	7.55002	15.6861	13.3107	9.85202	0.378189	0.999904	-0.0921503	0.16245	0.999971	-0.14607	0.00123338	0.18918	-0.337868	DNA-directed RNA polymerase subunit beta, putative, expressed
LOC_Os05g09728	22.5538	11.1526	5.25834	11.3365	9.8423	5.89896	7.40299	5.99033	4.17838	16.1807	11.2076	5.4481	0.571975	0.999904	0.0967192	0.436576	0.999971	-0.133146	0.0012476	0.190166	-0.552402	expressed protein
LOC_Os01g12130	0.303245	0.398245	4.23775	1.0055	0.678818	1.143	0.12883	0	1.67913	1.52935	1.24467	3.67157	0.230556	0.999904	-0.825879	0.301863	0.999971	-0.711199	0.00127555	0.193207	-2.21907	nodulin MtN3 family protein, putative, expressed
LOC_Os06g43900	117.304	76.1266	46.8558	77.725	70.709	47.1014	67.0977	52.5479	38.4859	101.575	68.4299	45.6049	0.287757	0.999904	0.0920762	0.449817	0.999971	-0.0654565	0.0012834	0.193207	-0.27887	ribosomal protein L35, putative, expressed
LOC_Os11g03230	2.30193	2.29188	1.30003	7.13848	1.70617	3.39355	1.66481	0.682161	0.966389	6.46744	1.52162	2.08831	0.223691	0.999904	-0.363747	0.435662	0.999971	0.233038	0.0013193	0.196191	-0.960132	nucleoside-triphosphatase, putative, expressed
LOC_Os05g42070	3.96712	2.70145	1.852	3.57276	1.88573	3.00642	2.12234	1.4229	0.599484	5.32181	1.85801	4.26954	0.434213	0.999904	-0.249817	0.450992	0.999971	-0.240796	0.00131931	0.196191	-1.02602	UDP-glucose flavonoid-O-glucosyltransferase, putative, expressed
LOC_Os02g46680	0.675036	0.133453	0.143202	0.324914	0.103988	0.156336	0.999108	0.366741	0.329994	0.199671	0.129442	0.161704	0.283779	0.999904	0.370524	0.816433	0.999971	0.0802445	0.00137489	0.203217	1.10613	multidrug resistance protein, putative, expressed
LOC_Os08g37874	35.5228	26.8786	48.6205	23.9888	28.5377	54.332	33.9802	36.9759	54.7823	23.6683	23.0082	45.756	0.053699	0.999904	0.2069	0.206269	0.999971	0.135544	0.00140914	0.207025	0.342404	2-nitropropane dioxygenase family, putative, expressed
LOC_Os01g12220	37.3899	19.5495	9.03397	16.812	22.9456	11.9964	11.2052	10.9791	4.10534	30.0252	17.35	8.41899	0.544803	0.999904	0.135742	0.929989	0.999971	0.0196943	0.00143968	0.208667	-0.714295	uncharacterized protein family UPF0016 domain containing protein, expressed
LOC_Os02g08010	31.3731	28.5126	27.2698	25.1517	19.09	20.2732	32.1396	41.6645	21.8822	17.806	17.8874	20.5462	0.0055856	0.999904	0.437985	0.395291	0.999971	0.134353	0.00144896	0.208667	0.503347	LTPL43 - Protease inhibitor/seed storage/LTP family protein precursor, putative, expressed
LOC_Os03g55530	4.23153	2.68926	3.69626	5.34174	1.20528	2.42116	5.07375	3.00264	3.73091	2.61959	1.10661	2.52441	0.00695389	0.999904	0.579959	0.238464	0.999971	0.253303	0.00144914	0.208667	0.684311	HLS, putative, expressed
LOC_Os03g07440	27.4139	20.9928	23.9293	21.078	18.2844	23.3012	17.3388	12.8738	16.9677	27.217	20.1217	21.1532	0.621394	0.999904	0.0571201	0.474504	0.999971	-0.0827143	0.00145454	0.208667	-0.368206	putativ eribonuclease P, putative, expressed
LOC_Os01g08090	8.22649	15.9759	18.9411	7.96358	16.726	19.8745	11.5403	17.1328	19.405	7.0371	14.644	14.8313	0.0973568	0.999904	0.162003	0.0583626	0.999971	0.184983	0.00149688	0.210382	0.310293	flavonol-3-O-glycoside-7-O-glucosyltransferase 1, putative, expressed
LOC_Os10g11990	0.144991	0.209667	0.194131	0.041396	0.165571	0.027269	0	0.0519784	0	0.0858562	0.192528	0.183039	0.770799	0.999904	0.208342	0.250212	0.999971	-0.822296	0.00150237	0.210382	-2.27003	retrotransposon protein, putative, Ty1-copia subclass, expressed
LOC_Os02g57030	95.9405	46.7382	33.02	54.2567	28.0935	25.8455	45.4259	30.4385	26.5867	74.3857	42.5675	30.2068	0.143285	0.999904	0.145173	0.00308881	0.999971	-0.293463	0.00150645	0.210382	-0.314756	expressed protein
LOC_Os05g35594	0.893221	0.684654	0.796012	1.01929	0.800144	0.621476	0.474343	0.541218	0.227774	1.56131	1.34323	0.739619	0.255361	0.999904	-0.382199	0.27568	0.999971	-0.366288	0.00150687	0.210382	-1.06632	peptide transporter, putative, expressed
LOC_Os05g33110	3.96067	4.44979	3.7623	3.42554	3.38636	3.97008	3.73921	4.26175	7.28829	2.50189	3.21394	2.51524	0.0325695	0.999904	0.393093	0.135327	0.999971	0.274664	0.00150963	0.210382	0.583534	endo-1,3;1,4-beta-D-glucanase precursor, putative, expressed
LOC_Os01g19940	51.9559	61.0972	88.9556	67.0589	75.0359	100.283	80.1162	92.8421	112.82	69.9053	66.4542	92.4998	0.049986	0.999904	-0.140331	0.437448	0.999971	0.0555937	0.00153111	0.212163	0.226863	expressed protein
LOC_Os10g38710	66.1949	26.6064	54.3427	43.5034	22.2583	27.8339	18.5032	11.6382	38.2849	64.0281	24.5626	47.8659	0.731293	0.999904	0.0795529	0.142077	0.999971	-0.340098	0.00156427	0.214203	-0.732618	glutathione S-transferase, putative, expressed
LOC_Os03g21380	33.0559	32.8376	51.9197	39.5463	36.0009	52.1093	40.3448	46.0864	66.4805	30.9858	33.7118	59.065	0.68095	0.999904	-0.0306075	0.393878	0.999971	0.0634684	0.00156764	0.214203	0.235371	OsCML27 - Calmodulin-related calcium sensor protein, expressed
LOC_Os02g13210	0.228293	0.137817	0.182047	0.171326	0.33415	0.255052	0	0.114679	0	0.308914	0.383845	0.103781	0.714369	0.999904	-0.24743	0.943475	0.999971	0.0479339	0.00157487	0.214203	-2.13666	transposable element protein, putative, containing Pfam profile: PF03004, Transposase_24, expressed
LOC_Os05g33840	26.3279	1.79512	1.92909	8.92439	1.08312	1.09426	2.31256	1.39045	1.03644	33.1594	2.20856	3.12836	0.489667	0.999904	-0.306737	0.021599	0.999971	-1.02004	0.00158097	0.214203	-1.40279	transketolase, putative, expressed
LOC_Os03g21664	172.073	120.274	63.4801	123.337	115.161	57.673	117.64	73.2399	48.4228	147.881	112.326	55.2582	0.14678	0.999904	0.119068	0.661954	0.999971	-0.0358777	0.00160238	0.215906	-0.258936	expressed protein
LOC_Os01g25600	39.7588	28.7264	19.7138	21.8284	34.0386	16.3959	21.2021	19.234	11.661	34.0687	29.7499	17.1902	0.533929	0.999904	0.0850002	0.391236	0.999971	-0.117162	0.00170307	0.228212	-0.428766	tetratricopeptide repeat domain containing protein, expressed
LOC_Os07g06644	37.4581	10.4816	8.73611	22.3906	8.65209	8.57552	21.8784	7.37904	6.43425	28.9537	10.3187	8.50202	0.288126	0.999904	0.0996487	0.137266	0.999971	-0.139406	0.00172521	0.229915	-0.293988	expressed protein
LOC_Os02g46750	49.5037	35.1692	15.5724	30.3602	31.921	13.1744	34.2342	23.0565	10.1539	37.8956	34.684	14.9786	0.260716	0.999904	0.106186	0.131969	0.999971	-0.142221	0.00174767	0.230456	-0.295517	expressed protein
LOC_Os08g24390	42.0551	31.1299	22.1393	24.6458	28.0991	16.8633	22.9468	22.8077	15.7102	33.4592	27.6806	19.2109	0.0451522	0.999904	0.162164	0.0876942	0.999971	-0.138239	0.00174826	0.230456	-0.253374	expressed protein
LOC_Os04g16450	5.67789	3.75595	5.91211	6.20589	3.69062	5.07288	4.07391	2.31099	5.00093	7.8096	4.30499	5.9885	0.30824	0.999904	-0.156052	0.237971	0.999971	-0.180733	0.00176656	0.230456	-0.4789	aquaporin protein, putative, expressed
LOC_Os07g39430	38.0977	28.7574	23.9493	34.9564	28.3819	20.7876	27.6097	21.1248	18.2839	37.0194	28.7226	20.5136	0.4152	0.999904	0.0611318	0.824776	0.999971	-0.0166119	0.00176707	0.230456	-0.234602	mTERF family protein, expressed
LOC_Os10g21308	214.592	169.441	103.669	142.908	108.582	84.5022	127.718	104.018	33.0103	224.678	123.396	140.661	0.959651	0.999904	-0.0116443	0.118229	0.999971	-0.359575	0.00178622	0.231715	-0.718955	chloroplast 50S ribosomal protein L33, putative, expressed
LOC_Os03g13010	9.73023	8.66994	7.30585	8.91274	5.694	5.45937	6.41222	5.46793	5.47045	9.88823	8.06777	6.49345	0.583769	0.999904	0.0574184	0.0490229	0.999971	-0.206286	0.00180972	0.233465	-0.326954	U-box domain containing protein, expressed
LOC_Os11g24450	94.2612	26.1399	61.9449	75.0793	20.385	43.4294	35.095	16.1209	43.9713	101.868	24.4609	49.9717	0.693257	0.999904	0.0673901	0.225422	0.999971	-0.207111	0.00181886	0.233465	-0.532766	mitochondrial carrier protein, putative, expressed
LOC_Os08g04800	0.233265	0.280814	0.191754	0.0322277	0.174056	0.334944	0.545049	0.761177	1.29164	0.0534738	0.313643	0.0753142	0.263865	0.999904	0.680808	0.812075	0.999971	0.144869	0.00184168	0.234111	1.89785	triacylglycerol lipase like protein, putative, expressed
LOC_Os04g54790	62.801	49.5346	76.3761	64.9441	42.1013	62.8394	46.3309	38.1435	60.9344	63.9481	49.5414	64.2535	0.445209	0.999904	0.051093	0.415901	0.999971	-0.0544477	0.00184757	0.234111	-0.208387	ELMO/CED-12 family protein, putative, expressed
LOC_Os02g45600	4.79809	6.42336	5.13667	5.14904	5.57845	5.18719	4.55087	4.72172	3.51206	6.67623	7.16997	5.72817	0.180001	0.999904	-0.183134	0.141456	0.999971	-0.200841	0.00185269	0.234111	-0.42519	rhoGAP domain containing protein, expressed
LOC_Os07g06830	20.8684	20.6251	29.6394	20.7211	22.337	58.6789	22.1401	31.9573	56.2037	17.6075	18.3756	31.8424	0.628416	0.999904	0.0707307	0.0261767	0.999971	0.324978	0.00190432	0.237678	0.453763	gibberellin receptor GID1L2, putative, expressed
LOC_Os09g28640	21.1769	11.1066	18.6707	13.5598	9.47352	13.2268	9.47441	7.00275	14.9324	15.998	14.7991	16.5957	0.802397	0.999904	0.0366472	0.0585797	0.999971	-0.276976	0.00190664	0.237678	-0.454624	gibberellin receptor GID1L2, putative, expressed
LOC_Os03g55240	19.9966	14.374	16.4802	18.3826	13.0959	12.7966	20.1082	12.8722	17.4605	15.0391	9.85127	14.3776	0.00118344	0.786782	0.265805	0.127396	0.999971	0.124954	0.00191015	0.237678	0.254413	cytochrome P450, putative, expressed
LOC_Os01g07270	9.99539	4.039	0.28091	5.38218	3.51878	1.84004	0.87106	1.07912	0	6.81528	2.75683	1.48948	0.710403	0.999904	-0.218437	0.906474	0.999971	0.069115	0.00196697	0.242393	-1.82083	transposon protein, putative, unclassified, expressed
LOC_Os10g27420	7.17977	5.87607	4.70454	8.02186	4.00636	3.75396	6.49833	3.74594	1.81949	9.08818	6.00873	5.54334	0.491107	0.999904	-0.140377	0.137888	0.999971	-0.302488	0.00196833	0.242393	-0.630983	expressed protein
LOC_Os10g08014	4.64043	4.15241	2.87966	4.33697	2.91262	2.13123	2.02941	2.01132	2.86384	4.12994	5.0997	3.89986	0.529614	0.999904	-0.130621	0.0765527	0.999971	-0.368022	0.00197787	0.242393	-0.642834	white-brown complex homolog protein 11, putative, expressed
LOC_Os02g45520	3.98241	6.71445	27.0412	7.4305	10.029	13.7229	1.80068	4.59164	9.79043	5.6953	9.21065	17.5546	0.756924	0.999904	-0.0807816	0.887571	0.999971	0.036898	0.00203234	0.247533	-0.805269	uncharacterized membrane protein, putative, expressed
LOC_Os03g16020	38.9661	65.8276	119.065	24.8385	58.6064	138.733	64.811	84.8498	175.941	39.651	44.2679	121.146	0.466485	0.999904	0.120073	0.927849	0.999971	-0.0149308	0.00205187	0.247533	0.508285	hsp20/alpha crystallin family protein, putative, expressed
LOC_Os07g29700	1.46032	3.12532	2.31196	0.896696	0.678004	1.16492	0	1.36637	0.189149	1.33906	2.93952	1.36209	0.711388	0.999904	0.216376	0.276858	0.999971	-0.635927	0.00207144	0.247533	-1.8011	expressed protein
LOC_Os02g48600	3.55252	3.274	2.40798	4.33982	4.91094	3.42307	2.85962	3.70011	1.30777	3.77187	5.34559	5.1615	0.0433761	0.999904	-0.435508	0.591116	0.999971	-0.115819	0.00208077	0.247533	-0.663686	expressed protein
LOC_Os04g57570	0.0586502	0.143137	0.109391	0.189495	0.0588705	0.0300753	0.0227423	0	0	0.0435863	0.0319984	0.10122	0.403929	0.999904	0.594206	0.692071	0.999971	0.281963	0.0020932	0.247533	-2.19042	retrotransposon protein, putative, unclassified, expressed
LOC_Os12g02550	2.59268	0.412205	0.592602	1.41037	0.877147	0.844517	0.320995	0.366591	0	2.31532	0.894756	0.542563	0.784771	0.999904	-0.185434	0.971414	0.999971	-0.0243307	0.00210303	0.247533	-2.08805	expressed protein
LOC_Os10g25040	44.0984	56.1228	108.332	49.1282	74.8267	161.778	62.7953	98.3165	162.22	51.4433	78.7322	121.579	0.0094443	0.999904	-0.203055	0.406321	0.999971	0.064963	0.00211518	0.247533	0.240452	red chlorophyll catabolite reductase, putative, expressed
LOC_Os04g48230	14.8192	22.216	18.316	17.1603	22.7508	22.115	23.3977	22.7121	24.8464	15.3826	21.1076	19.468	0.842288	0.999904	-0.0161365	0.191434	0.999971	0.105946	0.00211531	0.247533	0.249268	dehydration response related protein, putative, expressed
LOC_Os05g40410	17.3112	11.9296	12.545	19.9368	13.0914	11.4037	15.4807	10.4907	8.3504	19.61	13.3905	12.603	0.390467	0.999904	-0.0819797	0.727432	0.999971	-0.0332725	0.00212579	0.247533	-0.293265	expressed protein
LOC_Os10g05780	5.60125	5.82795	4.86397	6.78907	4.61965	2.97234	3.77061	3.25848	3.69061	6.60005	5.92853	4.77017	0.721016	0.999904	-0.054236	0.132132	0.999971	-0.22869	0.00212612	0.247533	-0.466574	POT domain containing peptide transporter, putative, expressed
LOC_Os02g10400	6.5473	4.21213	5.23347	4.63779	2.89346	4.93435	2.88912	2.34552	2.99392	5.7051	4.66918	3.85411	0.517109	0.999904	0.112744	0.409545	0.999971	-0.143529	0.00214382	0.247533	-0.534221	expressed protein
LOC_Os11g25560	0.510067	0.15533	0.170149	0.294137	0.304478	0.254749	0.263803	0.130726	0.0775565	1.24045	0.313878	0.429613	0.0580099	0.999904	-0.814602	0.131431	0.999971	-0.648237	0.00214575	0.247533	-1.31896	BHLH transcription factor, putative, expressed
LOC_Os09g28810	14.5072	9.5514	3.68895	6.07169	5.6116	3.86064	10.3213	15.572	7.53123	7.83962	3.56994	3.64721	0.0467786	0.999904	0.535198	0.749005	0.999971	0.0861226	0.00215176	0.247533	0.825944	RNA recognition motif containing protein, putative, expressed
LOC_Os09g08072	12.9418	12.9479	10.5751	13.7197	11.9263	13.0113	21.1686	14.8492	15.0929	13.6862	14.0301	10.8884	0.538954	0.999904	-0.0555183	0.928772	0.999971	0.00807751	0.00219219	0.251	0.276769	glycosyl hydrolases, putative, expressed
LOC_Os07g38790	4.64788	1.56669	1.01887	3.39054	0.887837	0.617332	1.50069	0.939355	0.541817	3.38823	1.69721	1.03545	0.741277	0.999904	0.0728272	0.0832619	0.999971	-0.382059	0.00221803	0.25218	-0.674835	beta-hexosaminidase precursor, putative, expressed
LOC_Os07g01480	75.1691	41.6986	9.68906	48.8945	41.6248	9.40735	51.0956	27.3121	7.2106	57.2267	44.2948	10.6184	0.706663	0.999904	0.0398427	0.292666	0.999971	-0.111404	0.00222317	0.25218	-0.323817	oxygen evolving enhancer protein 3 domain containing protein, expressed
LOC_Os10g38470	69.0591	83.0079	46.9764	56.4973	71.9608	86.3743	91.2818	134.342	100.887	51.3232	84.7533	64.8428	0.922299	0.999904	-0.0158621	0.644332	0.999971	0.0750754	0.00226421	0.255646	0.496522	glutathione S-transferase, putative, expressed
LOC_Os11g47870	12.8172	16.7723	11.53	11.101	16.863	12.6297	15.1161	19.507	15.5187	12.8104	16.7824	9.81502	0.535285	0.999904	0.0531755	0.641643	0.999971	0.0399189	0.00228182	0.256279	0.261681	GRAS family transcription factor domain containing protein, expressed
LOC_Os01g74200	5.46441	6.62428	5.21184	5.48797	5.034	6.86552	7.63412	8.4731	8.33003	5.22746	4.78914	6.90448	0.819147	0.999904	0.0286539	0.792783	0.999971	0.032922	0.00229541	0.256279	0.382118	protein kinase domain containing protein, expressed
LOC_Os02g15750	82.9034	9.3998	11.3442	17.0741	9.3136	7.30139	5.95029	4.05435	6.48288	63.8844	10.0283	13.2505	0.975892	0.999904	0.0131462	0.128849	0.999971	-0.66066	0.00230135	0.256279	-1.3261	expressed protein
LOC_Os08g43334	1.73619	4.79874	20.4271	2.08591	4.2598	34.0116	2.65688	5.15433	33.3025	1.44077	3.77168	23.3374	0.491326	0.999904	0.0968873	0.0391468	0.999971	0.290386	0.00232607	0.257855	0.428699	HSF-type DNA-binding domain containing protein, expressed
LOC_Os06g38970	22.155	33.2384	27.1521	29.4289	32.4451	38.6081	29.6981	42.2827	38.6867	26.0162	32.4728	25.0625	0.832534	0.999904	-0.0195177	0.042944	0.999971	0.186845	0.00236626	0.261124	0.280595	expressed protein
LOC_Os04g52250	8.99131	2.49091	3.18728	14.3388	3.91065	2.72761	11.5049	2.27451	2.0523	27.0355	2.90711	6.65319	0.00742278	0.999904	-0.661265	0.100114	0.999971	-0.406132	0.00239184	0.262758	-0.750045	LTPL123 - Protease inhibitor/seed storage/LTP family protein precursor, expressed
LOC_Os03g58540	43.6515	30.8639	24.9197	31.2581	31.6986	20.0574	28.7422	19.7554	17.4804	36.9689	29.9314	19.6323	0.0881122	0.999904	0.144615	0.744699	0.999971	-0.0276128	0.00242438	0.263646	-0.257155	spo0B-associated GTP-binding protein, putative, expressed
LOC_Os02g01150	458.099	273.826	157.344	315.003	224.7	134.843	292.916	185.09	138.008	363.813	262.899	161.057	0.292858	0.999904	0.0821786	0.0437851	0.999971	-0.157513	0.00242987	0.263646	-0.236873	erythronate-4-phosphate dehydrogenase domain containing protein, expressed
LOC_Os12g43760	0.604489	1.02539	1.83934	0.877154	0.875782	1.62678	0.405257	0.209733	0.099182	1.75779	0.94793	1.23254	0.734125	0.999904	-0.188721	0.775288	0.999971	-0.158617	0.00243946	0.263646	-1.68402	transposon protein, putative, unclassified, expressed
LOC_Os02g12654	14.8252	17.359	16.2841	13.4417	17.2697	10.8748	10.3409	11.1733	7.97985	16.3057	15.0647	14.2563	0.68313	0.999904	0.0593306	0.46226	0.999971	-0.10685	0.00246032	0.263646	-0.440141	expressed protein
LOC_Os04g38640	26.5422	17.4102	22.3667	23.6131	18.1671	18.78	16.3927	13.2241	18.5718	24.289	18.2677	20.2851	0.600944	0.999904	0.045649	0.689489	0.999971	-0.0348709	0.00247339	0.263646	-0.264147	OsDegp5 - Putative Deg protease homologue, expressed
LOC_Os01g13370	15.577	13.264	15.8871	12.0549	12.7663	15.4769	19.2118	13.8128	15.2704	11.8028	11.108	13.1296	0.0246596	0.999904	0.214524	0.248468	0.999971	0.110196	0.00247619	0.263646	0.288957	seven in absentia protein family domain containing protein, expressed
LOC_Os01g08020	1.67814	0.601861	4.83103	2.03431	0.806901	4.07896	0.542251	0.421828	2.82833	3.08365	1.23622	3.00068	0.367348	0.999904	-0.28145	0.575233	0.999971	-0.174955	0.00248563	0.263646	-0.944488	boron transporter protein, putative, expressed
LOC_Os07g16600	0.253523	0.495152	0.406126	0.237103	0.17462	0.420038	0.0662808	0.0656899	0	0.178824	0.253936	0.302234	0.502795	0.999904	0.424574	0.900244	0.999971	0.0794235	0.00249546	0.263646	-1.91594	expressed protein
LOC_Os04g33660	33.9926	21.2694	17.351	26.7243	13.5487	11.5591	22.6872	14.0572	9.33184	28.8462	16.7157	22.2227	0.709509	0.999904	0.0520744	0.0261198	0.999971	-0.310955	0.00249722	0.263646	-0.422683	bifunctional monodehydroascorbate reductase and carbonic anhydrasenectarin-3 precursor, putative, expressed
LOC_Os08g32440	8.22496	6.02501	2.97056	6.22552	6.04739	4.1249	5.76705	3.96919	2.71983	8.01739	6.53771	4.0024	0.3736	0.999904	-0.118179	0.460322	0.999971	-0.0980652	0.00258733	0.271982	-0.400187	transposon protein, putative, unclassified, expressed
LOC_Os03g63970	2.0169	2.02832	1.55342	2.56059	2.19642	1.13494	0.972646	1.62958	0.540131	1.8994	2.02137	1.77759	0.915412	0.999904	-0.0240157	0.930551	0.999971	-0.0197054	0.00261329	0.272393	-0.680558	gibberellin 20 oxidase 1, putative, expressed
LOC_Os01g34800	0.022835	0	0	0.0472641	0.104267	0.0161007	0	0	0	0.130482	0.143709	0.0914873	0.0123519	0.999904	-2.46209	0.360325	0.999971	-0.90018	0.00261358	0.272393	-2.96194	retrotransposon protein, putative, unclassified, expressed
LOC_Os01g32780	108.091	106.351	165.909	108.898	127.3	243.994	140.961	160.524	201.986	93.8432	108.067	188.571	0.989126	0.999904	-0.00133343	0.0495802	0.999971	0.192104	0.00263737	0.273703	0.294199	universal stress protein domain containing protein, putative, expressed
LOC_Os04g55240	3.73133	6.8967	7.08889	6.04874	7.35032	9.46544	8.17264	12.6384	10.0044	4.06777	7.65174	9.34337	0.272568	0.999904	-0.155452	0.378582	0.999971	0.124755	0.00268344	0.277304	0.425317	VQ domain containing protein, putative, expressed
LOC_Os04g53230	212.184	95.8308	113.37	143.62	77.2253	101.502	88.0289	54.7542	91.8738	183.029	93.3123	92.0967	0.363038	0.999904	0.126972	0.433118	0.999971	-0.109422	0.00271077	0.278946	-0.418605	aminomethyltransferase, putative, expressed
LOC_Os09g03590	0.434049	0.190009	0.292764	0.202968	0.169411	0.0719132	0.0567385	0.0984072	0	0.244926	0.170121	0.183261	0.51383	0.999904	0.372625	0.53705	0.999971	-0.352304	0.00277373	0.284226	-1.7075	retrotransposon protein, putative, unclassified, expressed
LOC_Os04g46400	37.2126	38.2704	44.6916	30.9673	42.0708	58.6177	38.3678	49.6199	75.4237	29.8406	35.6756	56.4214	0.848295	0.999904	0.0188461	0.404935	0.999971	0.0820507	0.00282461	0.287866	0.294199	AP2 domain containing protein, expressed
LOC_Os04g41350	0.782968	1.10442	1.8117	1.87502	1.35022	2.62327	0.665269	1.39228	0.608486	2.03419	1.92082	2.21899	0.0598267	0.999904	-0.562626	0.774604	0.999971	-0.085604	0.00284273	0.287866	-0.892113	amino acid transporter, putative, expressed
LOC_Os05g24480	0.968195	4.66221	0.530597	0.53506	4.91259	0.695112	0	0	0	3.99508	1.91846	3.4386	0.453653	0.999904	-0.67707	0.41054	0.999971	-0.743576	0.00285342	0.287866	-2.6954	expressed protein
LOC_Os08g07060	41.8919	32.3399	17.528	27.5699	30.0912	16.5668	25.3297	19.0292	12.8672	31.4797	26.9886	16.9772	0.0747957	0.999904	0.165653	0.880084	0.999971	-0.0140263	0.00286498	0.287866	-0.277235	CRR6, putative, expressed
LOC_Os12g17320	26.3873	13.3593	16.0669	19.9425	12.7415	11.8662	13.7194	8.89743	9.31657	24.221	12.4541	9.79672	0.0402695	0.999904	0.216219	0.934205	0.999971	0.00870314	0.00287755	0.287866	-0.314214	polyprenyl synthetase, putative, expressed
LOC_Os10g07440	83.484	157.497	150.441	105.442	158.048	195.643	122.015	166.926	211.235	84.9233	144.287	183.31	0.56325	0.999904	-0.0427899	0.0881866	0.999971	0.126221	0.00290697	0.287866	0.220413	expressed protein
LOC_Os10g11060	32.9415	36.7395	31.3029	27.0079	37.2046	35.3458	39.7723	45.8861	39.0619	27.3225	34.8472	35.0865	0.630339	0.999904	0.0414653	0.794422	0.999971	0.0224514	0.00293077	0.287866	0.256323	ACI13, putative, expressed
LOC_Os05g04070	40.6871	34.2402	22.3471	24.3299	27.5188	19.0099	23.456	21.3857	18.0887	31.6005	31.666	20.5642	0.128407	0.999904	0.13749	0.0806513	0.999971	-0.157973	0.00294332	0.287866	-0.2689	expressed protein
LOC_Os01g57945	27.0646	55.3727	48.4888	60.1241	26.929	19.4326	30.6617	3.1723e-08	2.90275e-08	33.0905	55.2657	46.1084	0.973137	0.999904	-0.0498823	0.825952	0.999971	-0.325738	0.00295266	0.287866	-4.40344	cytochrome b6-f complex subunit 4, putative, expressed
LOC_Os03g53650	38.5661	40.8847	41.7984	38.3059	36.8843	43.613	51.7687	49.6987	45.9097	37.835	42.9207	38.5085	0.814178	0.999904	0.0170678	0.968648	0.999971	-0.00285416	0.00296682	0.287866	0.215756	cysteine synthase, putative, expressed
LOC_Os02g50560	57.7729	39.0081	24.0846	44.0913	38.5382	21.6293	34.5151	28.6843	18.2683	46.0006	32.9181	21.8648	0.0135693	0.999904	0.164316	0.57987	0.999971	0.0368492	0.00298014	0.287866	-0.197686	DSHCT domain containing protein, expressed
LOC_Os10g08010	2.04347	1.67363	1.65908	2.17494	1.80714	0.760719	0.771682	0.573602	1.05872	3.95576	2.6137	1.51503	0.382166	0.999904	-0.334518	0.159309	0.999971	-0.538727	0.00298226	0.287866	-1.13669	expressed protein
LOC_Os03g01200	16.0399	10.4578	9.46524	12.1361	11.4349	6.41306	10.8425	5.86021	6.24427	16.6264	12.9114	6.98491	0.899948	0.999904	0.0185961	0.245592	0.999971	-0.171739	0.00299434	0.287866	-0.439038	SNF2 family N-terminal domain containing protein, expressed
LOC_Os08g29170	99.0539	46.2354	81.8054	68.2751	33.541	57.6095	31.7678	25.5253	63.5504	83.7651	49.9621	66.8166	0.60678	0.999904	0.0970623	0.187969	0.999971	-0.248299	0.00299537	0.287866	-0.559773	dehydrogenase, putative, expressed
LOC_Os05g18446	1.71594	1.23111	0.655926	3.36421	0.375386	0.71524	1.01676	0.366003	0	2.53216	1.5246	1.25007	0.54099	0.999904	-0.404846	0.423445	0.999971	-0.530107	0.00299566	0.287866	-1.96569	retrotransposon protein, putative, Ty3-gypsy subclass, expressed
LOC_Os01g64960	199.584	67.82	152.798	137.893	55.8498	126.658	66.6606	36.5322	117.604	194.185	67.5408	117.801	0.606647	0.999904	0.0967798	0.4211	0.999971	-0.151225	0.00300003	0.287866	-0.557848	chlorophyll A-B binding protein, putative, expressed
LOC_Os04g57580	0.542611	1.69173	0.413639	1.33867	0.477024	0	2.92856e-07	0.307059	0	1.52589	0.880879	0.328896	0.950879	0.999904	-0.0506144	0.202224	0.999971	-1.04777	0.00300991	0.287866	-2.43754	retrotransposon protein, putative, unclassified, expressed
LOC_Os02g26400	12.2879	7.13592	4.3303	6.70481	6.09095	3.59584	6.66095	4.92497	1.55937	8.47207	6.97427	4.56	0.538324	0.999904	0.113794	0.280068	0.999971	-0.19975	0.00306203	0.290929	-0.547645	nuclease, EndA/NucM family protein, expressed
LOC_Os05g48160	35.2632	29.0882	39.5942	47.1892	30.4102	37.0528	21.9564	22.1997	33.4975	38.3754	29.25	40.0546	0.760693	0.999904	-0.0342987	0.607013	0.999971	0.0579218	0.0030658	0.290929	-0.333456	2Fe-2S iron-sulfur cluster binding domain containing protein, expressed
LOC_Os06g40020	0.155454	0	0	0.229093	0.0463982	0.0372026	0	0.0654541	0	0.261333	0.264025	0.284418	0.00778417	0.999904	-2.30225	0.179509	0.999971	-1.16118	0.00310414	0.293426	-2.55826	DEAD-box ATP-dependent RNA helicase 52A, putative, expressed
LOC_Os02g03670	61.5104	30.2196	18.4765	44.5565	24.9466	11.3316	34.1692	19.5593	12.4329	57.6709	30.0478	12.3816	0.139193	0.999904	0.15629	0.0969147	0.999971	-0.175441	0.00312829	0.294566	-0.312289	expressed protein
LOC_Os02g16050	0.0394867	0.0624978	0.0754508	0.140548	0.14625	0.105666	0.0633997	0	0	0.0848107	0.0654213	0.138515	0.544933	0.999904	-0.444944	0.650564	0.999971	0.332936	0.00318111	0.298388	-2.16799	transposon protein, putative, unclassified, expressed
LOC_Os01g26340	14.9698	19.3558	13.2566	17.6415	18.7597	14.3775	16.0046	14.6932	7.39634	18.7265	19.3633	17.7327	0.239612	0.999904	-0.171693	0.501833	0.999971	-0.0980564	0.00319355	0.298407	-0.430483	dirigent, putative
LOC_Os01g27750	37.2029	29.1806	36.3583	35.842	30.2064	44.7696	40.9099	40.3178	48.383	37.7069	31.6313	36.4859	0.637391	0.999904	-0.0329575	0.587084	0.999971	0.0379721	0.00323152	0.300803	0.205906	bifunctional 3-dehydroquinate dehydratase/shikimate dehydrogenase,chloroplast precursor, putative, expressed
LOC_Os12g12470	2.11757	0.588564	1.06839	1.15167	0.361159	0.386109	0.285595	0.424573	0.156731	1.63352	1.00854	0.542618	0.755915	0.999904	0.130737	0.185589	0.999971	-0.556736	0.0032453	0.300936	-1.23797	NADP-dependent oxidoreductase, putative, expressed
LOC_Os01g57350	42.068	22.6172	18.2121	30.1412	23.8771	14.391	27.6479	17.3608	13.2718	32.8687	23.7515	16.7527	0.244544	0.999904	0.0933173	0.345337	0.999971	-0.075673	0.00327573	0.301386	-0.235807	diacylglycerol kinase, putative, expressed
LOC_Os02g39740	68.186	46.1972	38.8242	64.1175	40.5775	37.933	41.7139	35.4234	35.9523	66.6601	43.1755	38.7467	0.714049	0.999904	0.030316	0.640306	0.999971	-0.0386597	0.00327908	0.301386	-0.243265	psaB translation factor, putative, expressed
LOC_Os06g11135	77.6492	73.3806	87.5765	85.0374	63.0524	104.347	94.4826	83.4077	131.769	80.0063	74.4637	90.1391	0.743532	0.999904	-0.0248908	0.836288	0.999971	0.0157208	0.00329429	0.301386	0.223579	gibberellin receptor GID1L2, putative, expressed
LOC_Os01g02870	15.8776	15.1732	14.2558	10.7436	10.4072	10.3811	9.69929	10.4284	9.75856	14.1468	13.8457	13.4247	0.419887	0.999904	0.0884898	0.0137819	0.999971	-0.270192	0.00329958	0.301386	-0.322352	auxin-induced protein 5NG4, putative, expressed
LOC_Os02g47510	333.335	279.622	260.934	335.372	201.252	219.619	251.752	206.982	246.172	331.664	294.132	291.497	0.555153	0.999904	-0.0525402	0.0157033	0.999971	-0.215104	0.00331394	0.301413	-0.261519	9-cis-epoxycarotenoid dioxygenase 1, chloroplast precursor, putative, expressed
LOC_Os05g49110	2.34832	0.254019	0.284172	1.04761	0.161567	0.187507	0.184733	0.108822	0	1.64897	0.127619	0.228649	0.550679	0.999904	0.410576	0.841882	0.999971	-0.137252	0.00332459	0.301413	-2.02006	retrotransposon protein, putative, Ty1-copia subclass, expressed
LOC_Os05g22614	128.194	40.7464	43.6448	52.2169	32.151	31.0955	30.5196	20.7072	34.194	112.066	38.053	41.288	0.718002	0.999904	0.0856667	0.0892736	0.999971	-0.403091	0.00338291	0.305565	-0.695195	PTAC16, putative, expressed
LOC_Os05g25400	56.6257	36.6554	31.5324	49.5244	41.4893	26.6853	43.1229	28.5809	20.2317	51.6015	37.9902	25.9361	0.29448	0.999904	0.0836963	0.733322	0.999971	0.0272012	0.00344425	0.309442	-0.233524	RNA binding protein, putative, expressed
LOC_Os02g44880	4.43379	8.24898	5.26465	3.9817	6.5616	6.85278	7.27295	9.93059	7.7529	4.99731	7.21663	4.69225	0.756823	0.999904	0.0425517	0.879484	0.999971	0.0208355	0.00345122	0.309442	0.401859	expressed protein
LOC_Os04g58700	0.616466	0.925248	0.849426	1.30432	0.883563	1.47951	1.58635	1.86491	1.72472	0.969042	0.887467	0.830272	0.566879	0.999904	-0.128334	0.195484	0.999971	0.290109	0.00346629	0.309655	0.655067	expressed protein
LOC_Os08g34390	0.215054	0.0941423	0.530351	0.118847	0.192561	0.115798	0	0.181097	0	0.492991	0.2435	0.833214	0.392409	0.999904	-0.675111	0.162751	0.999971	-1.10186	0.00353394	0.31269	-2.3026	retrotransposon protein, putative, unclassified, expressed
LOC_Os05g25920	14.1532	25.1026	25.721	12.5145	28.1801	31.0738	19.8617	41.1378	35.8716	12.8105	25.7956	30.1301	0.815581	0.999904	-0.0290323	0.784912	0.999971	0.0339731	0.0035374	0.31269	0.363067	expressed protein
LOC_Os03g60639	36.6357	33.8127	15.1417	19.0652	33.8517	11.7265	18.6771	21.8527	7.47377	24.5652	28.4322	14.7364	0.146718	0.999904	0.199376	0.465902	0.999971	-0.100176	0.00355047	0.31269	-0.400554	expressed protein
LOC_Os04g55950	0.137523	1.20405	4.37126	0.152001	4.26883	6.51648	0.233701	1.73713	1.60315	1.51324	5.44999	12.6102	0.00542904	0.999904	-1.53024	0.0801899	0.999971	-0.962911	0.00355155	0.31269	-1.60457	expressed protein
LOC_Os04g33340	0	0.611342	1.05334	0.617415	0.833636	1.30291	0	0.352803	0	1.28056	0.869685	1.13155	0.140133	0.999904	-1.153	0.804569	0.999971	-0.193382	0.00359058	0.31499	-2.27588	expressed protein
LOC_Os11g29720	31.4419	46.6529	105.569	28.3588	43.482	86.2938	16.5621	29.207	84.4939	25.1397	37.6759	102.775	0.115742	0.999904	0.154268	0.746467	0.999971	0.031709	0.00362184	0.315913	-0.285345	cytochrome P450, putative, expressed
LOC_Os09g30414	35.9245	42.3529	49.8663	38.7651	42.9278	75.3356	37.2126	51.7651	81.1947	33.8468	39.2538	47.8885	0.576942	0.999904	0.0582313	0.0288843	0.999971	0.228085	0.00363285	0.315913	0.30359	aspartic proteinase nepenthesin-2 precursor, putative, expressed
LOC_Os03g57145	45.9351	41.6514	48.9635	47.7259	38.0953	58.5219	57.9217	47.512	86.7371	43.2239	37.6077	56.6633	0.962563	0.999904	0.00517925	0.650057	0.999971	0.0500609	0.00363997	0.315913	0.320855	expressed protein
LOC_Os01g59880	0.522678	0.609301	0.368324	0.373167	0.821555	0.54607	0.241353	0.167441	0.149008	0.651164	0.570886	0.284307	0.91739	0.999904	0.0332223	0.632583	0.999971	0.153134	0.00366579	0.317026	-0.930659	inositol-1, 4, 5-trisphosphate 5-phosphatase, putative, expressed
LOC_Os02g08270	0.585307	0.0683264	0.256611	0.25877	0.395977	0.616322	0.265238	0	0	0.930286	0.287182	0.151182	0.571486	0.999904	-0.411801	0.853568	0.999971	0.134318	0.00370353	0.318365	-2.11216	class I glutamine amidotransferase, putative, expressed
LOC_Os10g38489	29.4085	12.3588	14.8666	13.9462	10.805	14.9969	27.5082	22.5635	17.627	16.1777	9.34143	14.7558	0.109392	0.999904	0.294168	0.972004	0.999971	0.00644869	0.00370738	0.318365	0.533246	glutathione S-transferase GSTU6, putative, expressed
LOC_Os02g48860	7.70811	11.3883	11.311	8.54759	12.4718	17.7307	11.246	16.74	22.0797	9.13729	11.8427	16.586	0.043395	0.999904	-0.19757	0.843498	0.999971	0.0193103	0.00374534	0.319876	0.283544	aspartic proteinase nepenthesin-2 precursor, putative, expressed
LOC_Os12g07150	53.478	44.3106	37.3214	55.4152	49.6346	42.8921	68.61	49.0071	52.7356	52.2678	48.67	39.2628	0.542782	0.999904	-0.0409766	0.392742	0.999971	0.0575423	0.00375581	0.319876	0.195115	amidase family protein, putative, expressed
LOC_Os11g32420	0.0222872	0.192259	0	0.138009	0.0366997	0	0	0	0	0.13385	0.0843596	0.0356677	0.305763	0.999904	-1.01812	0.323747	0.999971	-0.980977	0.00376432	0.319876	-2.88021	transposon protein, putative, unclassified, expressed
LOC_Os03g10090	14.8336	27.4764	115.506	27.7262	28.8498	65.7011	13.1193	19.0102	69.7046	25.2085	36.6829	110.985	0.200129	0.999904	-0.260101	0.276299	0.999971	-0.221018	0.00378636	0.320631	-0.587819	transporter family protein, putative, expressed
LOC_Os01g61010	4.02118	8.16364	11.5631	5.26976	7.65055	8.25798	3.38149	6.89389	7.76668	4.81553	8.33763	12.5833	0.413178	0.999904	-0.0956209	0.241401	0.999971	-0.13689	0.00383477	0.323607	-0.337868	nodulin, putative, expressed
LOC_Os02g26210	96.0486	62.2994	119.282	86.6702	74.2936	75.7353	54.1041	54.9716	71.5819	79.2124	73.3341	126.747	0.939417	0.999904	-0.0107821	0.340411	0.999971	-0.135248	0.00388122	0.325452	-0.409659	flowering promoting factor-like 1, putative, expressed
LOC_Os04g13220	46.9309	41.7423	38.5377	38.8514	48.3322	43.9214	55.4476	54.6032	49.1475	45.5285	44.4319	41.7244	0.573623	0.999904	-0.0376139	0.932517	0.999971	-0.00566013	0.00392117	0.325452	0.192803	ABC transporter family protein, putative, expressed
LOC_Os09g35940	9.42945	3.10558	1.58754	11.8923	2.22328	0.657885	5.3748	2.24028	0.758082	11.0046	3.41387	1.71789	0.624528	0.999904	-0.10937	0.0541538	0.999971	-0.430291	0.00395901	0.325452	-0.643872	cytochrome P450, putative, expressed
LOC_Os02g49570	26.5619	18.3167	18.0493	22.5546	15.5368	12.377	18.331	12.1339	13.7976	25.1003	16.7409	14.6214	0.133076	0.999904	0.118567	0.148808	0.999971	-0.113963	0.00396205	0.325452	-0.227426	OsProtIV1 - Putative Protease IV homologue; Domain 2 is a SPH, expressed
LOC_Os01g40200	12.3086	8.9144	8.91694	12.6427	7.85025	11.6072	12.8748	11.6984	14.5588	11.2778	8.52194	10.0901	0.978901	0.999904	0.00252997	0.534473	0.999971	0.059424	0.00396289	0.325452	0.275609	XIK, putative, expressed
LOC_Os01g52530	6.43498	5.27668	3.75018	5.16951	3.57895	5.251	6.56118	6.60842	7.64782	5.18104	3.74971	4.58098	0.438409	0.999904	0.118676	0.838572	0.999971	0.0312004	0.00397248	0.325452	0.441133	phosphoribosyl transferase, putative, expressed
LOC_Os06g22100	0.376525	0.593379	0.357666	0.33293	0.266452	0.648779	0.255939	0.951215	1.34604	0.184138	0.170532	0.275555	0.0824086	0.999904	0.712816	0.137179	0.999971	0.610011	0.00397305	0.325452	1.18207	DNA binding protein, putative, expressed
LOC_Os10g23820	21.728	21.3689	13.3722	17.9998	15.3791	20.2237	31.0775	31.7222	33.8065	26.2302	19.0177	17.3549	0.479661	0.999904	-0.111152	0.362628	0.999971	-0.143156	0.00397621	0.325452	0.452888	transferase family protein, putative, expressed
LOC_Os03g37490	109.787	89.6621	122.121	88.933	90.7788	156.292	108.558	126.074	165.579	85.6278	81.5979	141.725	0.508732	0.999904	0.0641917	0.393884	0.999971	0.0828215	0.00397674	0.325452	0.279764	MATE efflux family protein, putative, expressed
LOC_Os05g18470	17.4161	17.0779	18.1823	17.6614	19.4931	18.5994	14.3541	14.2628	15.5314	18.565	20.0895	21.2554	0.220647	0.999904	-0.127788	0.508085	0.999971	-0.0690499	0.00399325	0.325711	-0.300343	CRAL/TRIO domain containing protein, expressed
LOC_Os07g36390	43.9447	32.2266	20.0272	28.8232	30.3659	16.9641	24.3735	18.3694	15.3231	34.7053	25.597	17.6473	0.0371618	0.999904	0.197136	0.865182	0.999971	-0.0160606	0.00409695	0.33281	-0.271546	PPR repeat containing protein, expressed
LOC_Os06g22140	26.7904	24.6868	23.6605	31.437	21.5957	31.913	32.1432	28.1854	36.0255	24.9848	24.0443	25.8585	0.981751	0.999904	0.00200271	0.197264	0.999971	0.11289	0.0041213	0.33281	0.251166	thioredoxin reductase 2, putative, expressed
LOC_Os06g45500	15.6635	17.7753	19.9197	13.9193	20.0767	25.3515	19.2446	24.4272	23.1106	15.126	16.5767	20.7313	0.807813	0.999904	0.0211567	0.226323	0.999971	0.10523	0.00412716	0.33281	0.249469	copper-transporting ATPase, putative, expressed
LOC_Os02g06779	5.54253	2.31432	3.55149	4.42958	2.18873	4.65265	4.20219	0.861667	1.98803	4.84771	3.08956	5.0657	0.528871	0.999904	-0.168373	0.526953	0.999971	-0.169158	0.00413488	0.33281	-0.766743	expressed protein
LOC_Os03g56280	706.431	473.912	392.749	519.661	379.476	346.834	402.121	317.039	353.481	591.775	442.184	359.278	0.185823	0.999904	0.111386	0.216758	0.999971	-0.10399	0.00415829	0.333593	-0.241278	lactate/malate dehydrogenase, putative, expressed
LOC_Os01g16124	17.8921	18.4189	13.8767	15.5109	19.625	13.3538	14.2445	13.8143	11.0528	16.35	17.6058	15.2677	0.873553	0.999904	0.0128164	0.766163	0.999971	-0.0239499	0.00420209	0.335441	-0.230528	retrotransposon protein, putative, unclassified, expressed
LOC_Os12g06530	0.120725	0.106142	0.0341104	0.0285897	0.303897	0.0107429	0	0.0514393	0	0.145481	0.178356	0.0501927	0.677779	0.999904	-0.343171	0.364628	0.999971	-0.748774	0.00420883	0.335441	-2.36387	retrotransposon protein, putative, unclassified, expressed
LOC_Os07g22650	19.3586	11.9893	6.26419	8.86478	12.6123	6.31518	7.22815	5.50892	4.16127	13.2985	10.8114	5.4381	0.249915	0.999904	0.205954	0.858345	0.999971	-0.031949	0.00423766	0.335585	-0.511935	expressed protein
LOC_Os01g10580	30.593	19.6124	10.6183	25.2475	19.8854	7.88269	24.4922	13.9975	7.44964	27.9902	20.6106	10.2287	0.794125	0.999904	0.0250978	0.173379	0.999971	-0.130936	0.00424479	0.335585	-0.275002	B-box zinc finger family protein, putative, expressed
LOC_Os02g12900	4.2858	6.44569	8.0035	6.82772	7.04448	7.34679	4.90438	4.8225	4.72834	5.97207	7.51235	7.25186	0.294326	0.999904	-0.128954	0.810181	0.999971	0.029536	0.00425192	0.335585	-0.351546	cysteine synthase, putative, expressed
LOC_Os05g27580	0	0.211568	0.176573	3.3831	0.769327	2.94934	1.09505	1.56011	1.40848	0.147721	0.273612	0.208055	0.278393	0.999904	-0.66338	0.000501185	0.999971	2.12987	0.00426847	0.335805	1.74889	wound-induced protein WI12, putative, expressed
LOC_Os09g36190	32.2011	31.2797	35.3003	29.2261	33.9902	36.2002	35.7166	40.0727	35.8674	27.7574	31.0358	33.3756	0.307942	0.999904	0.0703465	0.266863	0.999971	0.0766091	0.00430021	0.337214	0.197006	glycosyl transferase family 8, putative, expressed
LOC_Os05g40920	5.53237	4.78866	6.92511	7.15707	5.76057	5.57427	8.066	7.78233	8.3547	6.31238	4.50236	5.90674	0.828237	0.999904	0.0290986	0.427254	0.999971	0.106476	0.00432425	0.338012	0.382702	expressed protein
LOC_Os03g19760	117.409	64.2878	73.7761	102.036	49.8644	57.8248	67.3602	48.1673	59.751	109.46	60.7493	63.3902	0.301739	0.999904	0.0923744	0.187872	0.999971	-0.117795	0.0043531	0.338461	-0.255051	HAD-superfamily hydrolase, subfamily IA, variant 3 containing protein, expressed
LOC_Os05g49970	268.765	186.209	176.37	207.655	174.408	146.178	171.37	143.587	148.776	246.605	176.538	154.362	0.194299	0.999904	0.0904508	0.266382	0.999971	-0.0774519	0.00436732	0.338461	-0.19863	translation initiation factor IF-2, chloroplast precursor, putative, expressed
LOC_Os08g37605	34.4143	25.684	15.9039	26.9503	26.1733	13.4069	23.3178	20.9583	11.3992	28.693	24.7335	16.2545	0.434588	0.999904	0.0654524	0.443945	0.999971	-0.0641274	0.00438646	0.338461	-0.238647	riboflavin biosynthesis protein ribAB, chloroplast precursor, putative, expressed
LOC_Os12g19530	30.0302	26.9208	22.8156	21.3979	27.2796	18.2744	19.1329	20.5388	16.2272	25.3426	25.3767	19.2729	0.08401	0.999904	0.132026	0.530257	0.999971	-0.0479556	0.00440045	0.338461	-0.217609	ATP-binding region, ATPase-like domain-containing protein, putative, expressed
LOC_Os12g36670	37.6412	73.4595	61.7961	51.5463	65.476	89.0964	64.2697	74.5183	73.6129	42.958	53.091	54.3585	0.389134	0.999904	0.106505	0.0161952	0.999971	0.297367	0.00440598	0.338461	0.352159	F-box/LRR-repeat protein 3, putative, expressed
LOC_Os01g07730	17.5091	16.6886	22.3214	15.8868	21.4411	18.3656	14.1975	16.0777	14.7653	19.1011	17.9972	22.9029	0.519121	0.999904	-0.0631309	0.446508	0.999971	-0.0745438	0.00441639	0.338461	-0.278765	phosphate/phosphoenolpyruvate translocator-related protein, putative, expressed
LOC_Os10g02260	1.22842	1.65823	0.691975	1.67209	1.87701	0.781489	0.71562	0.720197	0.761342	1.99554	1.52537	0.857458	0.350731	0.999904	-0.204305	0.932852	0.999971	-0.0184469	0.00443727	0.338461	-0.622933	peptide transporter PTR2, putative, expressed
LOC_Os12g44040	33.9163	33.3669	40.9876	43.2998	36.8194	31.722	24.6438	29.6892	26.4575	40.3799	33.036	36.9273	0.849735	0.999904	-0.0204763	0.920285	0.999971	0.0108159	0.00445302	0.338461	-0.307393	transposon protein, putative, unclassified, expressed
LOC_Os01g08580	15.2776	16.391	13.4812	16.3993	14.3752	14.9097	12.1009	13.563	11.4705	16.9294	15.9204	15.5504	0.432769	0.999904	-0.0724857	0.540412	0.999971	-0.0565674	0.00446405	0.338461	-0.262732	frigida, putative, expressed
LOC_Os02g18450	76.2216	26.945	48.0512	59.1588	29.1762	27.4707	27.3415	17.4911	27.2275	85.2654	24.3889	34.5408	0.595944	0.999904	0.10543	0.492773	0.999971	-0.136381	0.00446877	0.338461	-0.565288	GTP-binding protein typA/bipA, putative, expressed
LOC_Os01g19260	7.83119	7.86197	10.9295	7.4437	8.81918	16.0612	9.31556	13.6771	19.057	7.46813	10.2302	13.1479	0.20222	0.999904	-0.133827	0.862246	0.999971	0.018209	0.00455208	0.341922	0.297732	ATPase, putative, expressed
LOC_Os01g74490	18.4434	14.3951	15.5922	9.87644	11.0095	29.7674	16.5213	22.9958	43	9.70138	8.74171	22.6652	0.313295	0.999904	0.254502	0.487159	0.999971	0.175375	0.00457332	0.341922	0.715714	heavy metal-associated domain containing protein, expressed
LOC_Os03g25790	41.9748	26.3142	30.3671	35.6271	29.6293	48.6916	41.8414	37.3669	50.5005	32.0931	23.9298	37.7412	0.685646	0.999904	0.0482231	0.105341	0.999971	0.192941	0.00458085	0.341922	0.337767	glycosyl hydrolases family 17 protein, expressed
LOC_Os07g38410	1.04661	0.652834	0.341832	0.605636	0.178368	0.0582941	0.626113	0	0	0.527131	0.452749	0.259649	0.556492	0.999904	0.429796	0.345553	0.999971	-0.689395	0.00458784	0.341922	-2.07175	YABBY domain containing protein, putative, expressed
LOC_Os03g61220	220.532	122.552	93.1405	162.803	127.693	73.4077	125.932	96.3214	69.3266	204.761	122.46	74.2144	0.27608	0.999904	0.100261	0.486384	0.999971	-0.0640752	0.00458866	0.341922	-0.26093	DEAD-box ATP-dependent RNA helicase 3, putative, expressed
LOC_Os01g18240	0.199395	0.329752	0.218548	0.36731	0.211603	0.20678	0.150597	0.0932838	0	0.264099	0.351198	0.257515	0.784814	0.999904	-0.163115	0.834861	0.999971	-0.124536	0.00459859	0.341922	-1.6929	MYB family transcription factor, putative, expressed
LOC_Os05g45300	31.9573	44.6991	52.3549	37.5124	52.7273	78.2028	46.8303	56.1431	78.0014	36.8844	47.0507	62.4077	0.105596	0.999904	-0.123807	0.114303	0.999971	0.120811	0.00464513	0.343598	0.216557	enoyl-CoA hydratase/isomerase family protein, putative, expressed
LOC_Os12g11980	1.27785	2.23757	12.6054	7.06188	3.81399	37.6147	0	0	4.46889	7.03045	13.0219	8.25159	0.245788	0.999904	-0.863312	0.877564	0.999971	0.114592	0.00465865	0.343598	-2.10482	expressed protein
LOC_Os03g13300	4.9848	8.81877	9.75179	7.93132	4.89371	12.7896	10.8143	10.122	16.3207	6.53325	6.1487	8.33019	0.679224	0.999904	0.0820677	0.501427	0.999971	0.133414	0.0046634	0.343598	0.561524	glutamate decarboxylase, putative, expressed
LOC_Os02g32780	9.34136	3.47935	1.9089	4.81238	5.10364	1.40952	3.82058	2.06659	1.07049	7.05578	3.47785	1.74828	0.519172	0.999904	0.12235	0.715451	0.999971	-0.0691911	0.00473631	0.347919	-0.536083	pentatricopeptide, putative, expressed
LOC_Os10g02380	71.7536	71.0369	45.7824	69.3838	64.7792	56.5566	84.7414	75.4535	62.7444	66.208	72.3292	45.6451	0.76994	0.999904	0.0213639	0.473627	0.999971	0.0523473	0.00476522	0.348991	0.206185	oxidoreductase, aldo/keto reductase family protein, putative, expressed
LOC_Os05g31680	63.0914	61.9152	34.7709	37.3266	54.0832	29.5938	38.5286	40.7841	22.0366	45.3893	50.3014	30.7374	0.00749108	0.999904	0.21962	0.529853	0.999971	-0.051594	0.0048117	0.35134	-0.231544	expressed protein
LOC_Os08g05810	0.956116	1.58686	1.49661	1.05446	1.33855	1.3066	0.322907	0.907613	1.28459	1.31097	1.63525	1.3915	0.70645	0.999904	-0.0907512	0.513781	0.999971	-0.157336	0.00483756	0.352175	-0.678934	DEAD-box ATP-dependent RNA helicase, putative, expressed
LOC_Os04g14690	429.401	266.932	190.523	382.907	284.272	223.95	480.639	384.268	305.162	374.584	291.976	261.904	0.26464	0.999904	-0.0908639	0.525475	0.999971	-0.0517191	0.00485314	0.352257	0.229432	flavin-containing monooxygenase family protein, putative, expressed
LOC_Os10g10300	0.639153	0.280963	0.111222	0.41792	0.330576	0.0754438	0.18235	0.0757458	0	0.343633	0.148142	0.0644276	0.200168	0.999904	0.583436	0.408368	0.999971	0.376534	0.00488901	0.353114	-1.28169	retrotransposon protein, putative, unclassified, expressed
LOC_Os11g29140	17.9794	10.5871	8.54526	17.1463	12.2997	4.68353	8.78747	8.9771	3.89506	21.8846	9.99866	6.83244	0.882504	0.999904	0.0273852	0.464909	0.999971	-0.135409	0.0048974	0.353114	-0.521355	expressed protein
LOC_Os02g09420	210.202	166.368	115.482	189.349	175.589	135.812	243.356	179.57	164.614	183.995	175.185	123.502	0.951323	0.999904	0.00436264	0.537683	0.999971	0.0440455	0.00490838	0.353114	0.201031	cyclase family protein, putative, expressed
LOC_Os12g43340	53.2185	48.6495	120.872	81.8618	44.5518	89.4927	36.2715	38.5244	84.4319	66.0226	57.2772	115.73	0.466488	0.999904	-0.112159	0.534487	0.999971	-0.0956738	0.00494604	0.353926	-0.432882	actin-depolymerizing factor, putative, expressed
LOC_Os06g10520	43.4504	32.7896	41.3847	32.9521	37.9594	49.8707	43.2555	36.7716	52.8563	35.597	26.7507	39.6901	0.1244	0.999904	0.147771	0.0787925	0.999971	0.169041	0.00494869	0.353926	0.270271	pantothenate kinase, putative, expressed
LOC_Os05g09020	58.5441	41.7328	41.9848	75.2734	37.4936	40.6145	117.117	52.2074	39.3607	65.6511	32.8099	35.3162	0.472616	0.999904	0.0991298	0.315191	0.999971	0.138625	0.00498737	0.355205	0.387538	WRKY67, expressed
LOC_Os05g03530	9.46717	9.31027	7.77388	10.2861	6.44294	8.62505	8.54667	9.36847	9.476	6.51435	5.17675	7.49683	0.0118288	0.999904	0.331172	0.0377198	0.999971	0.273373	0.00499571	0.355205	0.369338	tetraspanin family protein, putative, expressed
LOC_Os03g20480	2.06442	1.08447	1.13136	2.62401	0.308083	1.70447	0.350818	0.434613	0.240656	2.65019	1.05187	1.733	0.698344	0.999904	-0.209891	0.478498	0.999971	-0.383824	0.00503487	0.356106	-1.519	expressed protein
LOC_Os04g49540	8.72907	7.9682	5.54417	6.72819	6.70701	5.23671	5.88005	6.63264	2.94131	6.81317	8.25997	5.90168	0.692644	0.999904	0.0492877	0.372439	0.999971	-0.111216	0.00503758	0.356106	-0.349719	expressed protein
LOC_Os04g38410	389.451	43.6408	59.3285	119.512	31.2463	41.4946	42.4077	18.9926	57.4255	419.541	49.1268	76.2351	0.722678	0.999904	-0.148257	0.0653146	0.999971	-0.769981	0.00506021	0.356672	-1.17107	chlorophyll A-B binding protein, putative, expressed
LOC_Os06g22850	17.8186	19.04	19.2995	18.3375	19.8703	19.1892	13.7691	14.5915	15.7423	19.5553	18.4677	19.796	0.755958	0.999904	-0.0297046	0.955329	0.999971	-0.00535388	0.00508534	0.356878	-0.267766	microfibrillar-associated protein 1, putative, expressed
LOC_Os08g04350	3.68728	2.95926	2.08808	3.73582	4.18204	2.02957	3.02855	4.29533	1.43279	5.07163	5.01001	6.58748	0.0103601	0.999904	-0.660272	0.0332217	0.999971	-0.548445	0.00509273	0.356878	-0.721451	plastocyanin-like domain containing protein, putative, expressed
LOC_Os06g40940	637.791	455.941	521.752	601.692	356.044	333.038	464.154	273.449	337.333	570.81	428.3	395.331	0.116734	0.999904	0.149887	0.299543	0.999971	-0.0991277	0.00510703	0.356878	-0.267567	glycine dehydrogenase, putative, expressed
LOC_Os05g42280	52.8623	59.0216	82.4923	51.9897	51.4421	79.5311	44.3039	40.0178	64.2134	51.6889	55.394	75.5203	0.443467	0.999904	0.0576087	0.963565	0.999971	-0.00343392	0.00523036	0.36378	-0.209919	expressed protein
LOC_Os02g41510	10.7552	11.0561	6.62725	9.93577	10.349	8.2595	10.7297	14.5542	11.2278	8.34108	10.2694	6.32311	0.379113	0.999904	0.124237	0.283374	0.999971	0.151533	0.00523564	0.36378	0.394405	MYB family transcription factor, putative, expressed
LOC_Os06g03710	0.139845	0.0272082	0.153277	0.103044	0.0927538	0.546628	0.15843	0.143933	0.815105	0.028496	0.043984	0.0903031	0.374285	0.999904	0.506373	0.0379214	0.999971	1.18302	0.00525779	0.364281	1.59057	DELLA protein SLR1, putative, expressed
LOC_Os07g08000	0.0884464	0.0967958	0.145413	0.0488787	0.131992	0.127	0.0751507	0	0	0.141928	0.2754	0.0856699	0.674996	0.999904	-0.311115	0.564578	0.999971	-0.427423	0.00527938	0.364741	-2.06974	expressed protein
LOC_Os02g06770	7.87445	9.79534	11.0522	12.4526	6.41992	12.0105	8.92155	6.41011	8.40425	10.6348	13.1629	16.0074	0.0772971	0.999904	-0.321465	0.124757	0.999971	-0.279343	0.00529795	0.36499	-0.507392	expressed protein
LOC_Os05g03480	158.913	174.401	153.499	153.306	167.123	198.199	207.052	201.447	194.228	150.259	173.739	173.303	0.768107	0.999904	-0.0209482	0.56827	0.999971	0.0405393	0.00532129	0.365152	0.198001	acyl-coenzyme A dehydrogenase, mitochondrial precursor, putative, expressed
LOC_Os03g62170	18.959	20.3877	39.5475	21.1519	17.0109	23.7099	11.3651	15.7266	25.4566	21.8794	21.2241	31.6453	0.926978	0.999904	0.0127218	0.196852	0.999971	-0.179146	0.00533057	0.365152	-0.386777	cyclase/dehydrase family protein, expressed
LOC_Os11g02470	0.475724	0.191712	0.180002	0.680556	0.261422	0.903948	1.20934	1.01417	1.78681	0.652555	0	0.494889	0.639044	0.999904	0.314973	0.125306	0.999971	1.02938	0.00534522	0.365152	1.87052	WRKY52, expressed
LOC_Os02g52870	0.897665	0.654937	1.10688	0.702783	0.290252	1.15469	1.08053	2.11029	2.31088	0.480155	0.635252	1.03855	0.482205	0.999904	0.233687	0.784574	0.999971	-0.0909005	0.0053728	0.365595	0.925685	zinc finger, C3HC4 type domain containing protein, expressed
LOC_Os04g12980	44.5351	40.896	34.1626	39.8281	35.6568	42.8853	48.5895	48.6865	42.9075	40.0759	39.1481	35.1898	0.595777	0.999904	0.0394075	0.639847	0.999971	0.0347594	0.00538183	0.365595	0.206756	UDP-glucoronosyl/UDP-glucosyl transferase, putative, expressed
LOC_Os08g19140	38.862	27.3791	24.3637	21.9799	22.5379	18.1387	19.274	17.7508	17.6963	35.1974	24.1252	18.5549	0.143654	0.999904	0.165475	0.101934	0.999971	-0.185078	0.00539668	0.365595	-0.314849	adenylate kinase family protein, putative, expressed
LOC_Os02g37970	0.75138	0.0406722	0.0853463	0.513101	0.0293871	0	0	0	0	0.434105	0.212953	0.197019	0.589364	0.999904	-0.509222	0.187419	0.999971	-1.24367	0.00548723	0.36915	-2.61984	DUF581 domain containing protein, expressed
LOC_Os07g06410	10.9113	16.8453	7.45568	6.9164	15.0827	7.66713	13.8914	14.29	10.4488	8.06678	12.2354	6.42587	0.0743483	0.999904	0.255815	0.580521	0.999971	0.0792224	0.00551301	0.36915	0.397876	deoxyribonuclease tatD, putative, expressed
LOC_Os03g55030	7.09236	0.682116	3.98734	7.62589	2.47512	2.90722	3.28461	0.760276	2.35837	7.80671	1.49924	7.07164	0.125345	0.999904	-0.481695	0.667017	0.999971	-0.135215	0.00552216	0.36915	-0.872074	UDP-glucoronosyl and UDP-glucosyl transferase domain containing protein, expressed
LOC_Os08g30020	86.9441	24.8994	44.0537	34.9237	32.4943	24.2929	36.2349	26.4233	13.6904	114.602	32.3966	41.1185	0.592202	0.999904	-0.157213	0.0528186	0.999971	-0.568335	0.00553337	0.36915	-0.814237	membrane protein, putative, expressed
LOC_Os11g43960	7.90184	8.87885	11.5712	6.6475	7.33316	10.3126	6.2519	5.28021	7.57051	9.26977	8.67537	9.11017	0.791408	0.999904	0.0337486	0.334101	0.999971	-0.123249	0.00553533	0.36915	-0.353983	mitochondrial carrier protein, putative, expressed
LOC_Os06g06430	0.120932	0.317635	0.574375	0.0891086	0.382943	0.347291	0	0.509185	0	0.295707	0.62764	0.407282	0.621268	0.999904	-0.382633	0.461195	0.999971	-0.570695	0.00553997	0.36915	-2.14827	expressed protein
LOC_Os08g30770	4.32311	5.92694	3.86992	3.42618	7.40166	5.19955	5.26773	6.95322	5.97943	4.00236	5.61895	3.11474	0.404771	0.999904	0.115228	0.124199	0.999971	0.212631	0.00558242	0.370286	0.383297	ABC transporter, ATP-binding protein, putative, expressed
LOC_Os03g57240	22.8283	7.23703	8.03363	13.9184	4.35603	8.04407	7.07826	5.98192	6.24827	25.581	7.82382	9.4243	0.616791	0.999904	-0.117428	0.0562008	0.999971	-0.44809	0.00560845	0.370286	-0.649988	ZOS3-19 - C2H2 zinc finger protein, expressed
LOC_Os01g57360	49.0585	47.6083	43.1732	45.5317	54.9988	43.4511	38.3924	39.4543	38.8433	51.2248	46.7399	45.5516	0.715437	0.999904	-0.0265672	0.98597	0.999971	0.00128151	0.00561641	0.370286	-0.201815	acyltransferase, putative, expressed
LOC_Os09g31250	2.66724	1.92312	1.71967	3.55497	3.278	2.64711	5.86568	4.16185	3.38362	2.22995	1.73208	2.1262	0.933087	0.999904	0.0231694	0.113252	0.999971	0.43704	0.00562048	0.370286	0.764154	transposon protein, putative, unclassified, expressed
LOC_Os12g26850	4.80104	4.15225	2.6262	3.9073	4.02204	2.88245	3.05081	2.56386	1.54044	4.08744	3.94198	2.10305	0.240335	0.999904	0.144322	0.422481	0.999971	0.0985941	0.005652	0.370286	-0.340148	retrotransposon protein, putative, unclassified, expressed
LOC_Os02g43500	497.379	336.58	231.107	370.971	342.201	220.288	366.553	241.401	198.989	428.663	323.212	231.91	0.387132	0.999904	0.0614773	0.533738	0.999971	-0.0442375	0.00566785	0.370286	-0.196652	OR, putative, expressed
LOC_Os05g02760	2.1627	1.14962	3.13236	1.96352	2.35145	6.43262	2.62513	3.38224	7.56336	2.12476	0.918287	3.04245	0.762462	0.999904	0.0874448	0.0670836	0.999971	0.529767	0.00567316	0.370286	0.80027	expressed protein
LOC_Os03g20700	166.674	36.1669	45.7312	86.4027	26.4322	36.2245	37.5271	21.5683	36.828	163.299	33.1093	46.4623	0.904874	0.999904	0.0305402	0.149688	0.999971	-0.368156	0.00569145	0.370286	-0.706612	magnesium-chelatase, putative, expressed
LOC_Os02g36210	0.460931	0.111328	1.72472	0.650444	0.075963	0.342335	0.378153	0.0134018	0.0741132	0.96215	0.108037	0.400283	0.627383	0.999904	0.248754	0.575027	0.999971	-0.287317	0.00569367	0.370286	-1.41691	ent-kaurene synthase, chloroplast precursor, putative, expressed
LOC_Os08g42960	4.50365	4.65951	5.32646	4.56216	5.16365	6.25103	5.26911	7.70461	9.99175	4.78731	6.26129	5.09964	0.379351	0.999904	-0.104613	0.930523	0.999971	-0.0103753	0.0057383	0.371548	0.328725	ankyrin repeat-containing protein, putative, expressed
LOC_Os06g44170	37.7424	32.0154	39.2357	29.9574	35.9363	44.1261	35.1744	50.2352	46.5778	31.2122	31.9363	36.6825	0.38566	0.999904	0.0861051	0.368517	0.999971	0.0892554	0.00574355	0.371548	0.274149	NAD dependent epimerase/dehydratase family protein, putative, expressed
LOC_Os06g09560	3.01058	13.0004	32.1027	3.04552	9.38161	29.3809	5.80973	12.676	28.7305	2.2459	8.92643	25.6351	0.0840476	0.999904	0.296373	0.337183	0.999971	0.16464	0.00581074	0.374576	0.473169	heat shock protein DnaJ, putative, expressed
ChrSy.fgenesh.gene.7	0.564089	0.367314	0.439681	0.635243	0.120795	0.370581	0.0726792	0.0439127	0	0.15945	0.447373	0.275492	0.523611	0.999904	0.49665	0.871453	0.999971	0.126005	0.00582107	0.374576	-2.14743	expressed protein
LOC_Os03g52840	1328.32	700.776	707.915	826.227	555.682	618.817	688.193	443.238	601.554	1059.11	627.922	617.701	0.102519	0.999904	0.157093	0.209068	0.999971	-0.120856	0.00591826	0.378578	-0.264804	serine hydroxymethyltransferase, mitochondrial precursor, putative, expressed
LOC_Os01g57250	319.448	252.187	270.79	328.859	257.167	340.783	352.093	336.413	368.84	280.137	291.445	302.323	0.555328	0.999904	-0.0416041	0.446428	0.999971	0.053708	0.00591914	0.378578	0.194142	expressed protein
LOC_Os01g49470	42.5403	30.2997	32.33	35.9906	31.9866	28.9742	33.718	27.3018	25.0045	45.3873	29.3317	30.1731	0.858131	0.999904	0.0118069	0.364475	0.999971	-0.0598996	0.00592984	0.378578	-0.181748	E3 ubiquitin ligase, putative, expressed
LOC_Os01g07540	6.52438	7.16203	7.76818	5.74702	8.06607	6.49125	6.13455	6.02408	3.70631	7.56177	7.74363	7.89144	0.579305	0.999904	-0.0807266	0.334172	0.999971	-0.140623	0.00595243	0.379028	-0.400486	G-patch domain containing protein, expressed
LOC_Os08g04430	443.405	299.025	421.529	327.324	246.706	345.524	301.786	242.268	330.157	369.001	293.576	389.028	0.157377	0.999904	0.0936629	0.0409606	0.999971	-0.135394	0.00603153	0.381527	-0.181905	expressed protein
LOC_Os05g33520	94.7299	66.2193	61.4501	57.5374	71.6587	54.8523	48.9624	46.4941	43.8743	73.4585	65.7762	50.8096	0.164188	0.999904	0.149912	0.814389	0.999971	-0.0252994	0.0060433	0.381527	-0.295857	expressed protein
LOC_Os08g34720	34.7848	51.2145	27.1774	27.9131	39.8979	38.823	45.2551	57.8119	40.0392	30.6151	44.7106	28.4544	0.553025	0.999904	0.0720778	0.761683	0.999971	0.0368475	0.00604852	0.381527	0.333534	D-3-phosphoglycerate dehydrogenase, chloroplast precursor, putative, expressed
LOC_Os02g09510	46.4783	106.941	123.43	42.0748	105.995	176.305	61.4606	126.652	171.731	44.4184	98.6212	146.122	0.872427	0.999904	-0.0145813	0.436822	0.999971	0.0706082	0.00605424	0.381527	0.249247	limonoid UDP-glucosyltransferase, putative, expressed
LOC_Os12g39140	0.826329	2.51721	2.06847	1.92325	3.15627	1.74135	0.359224	2.15932	0	3.0843	3.22401	2.24673	0.495684	0.999904	-0.536018	0.757443	0.999971	-0.242984	0.00615989	0.387184	-2.15506	transposon protein, putative, unclassified, expressed
LOC_Os05g15530	7.27156	5.6668	10.2472	10.3775	6.82105	10.9862	12.0854	10.7664	11.7369	7.25391	7.73578	9.36526	0.577454	0.999904	-0.0731442	0.3131	0.999971	0.13244	0.00628852	0.394253	0.358737	aminotransferase domain containing protein, putative, expressed
LOC_Os01g46720	88.2499	75.3851	72.9842	88.7892	76.752	63.6389	82.7415	75.0548	55.7032	106.063	81.5041	70.2631	0.264802	0.999904	-0.0750655	0.10153	0.999971	-0.11023	0.00632321	0.395022	-0.18381	expressed protein
LOC_Os02g49920	3.22371	7.32132	6.21659	3.05407	4.91939	5.44679	2.92446	4.12305	3.6732	3.48943	6.73763	5.96329	0.915531	0.999904	0.0147435	0.202867	0.999971	-0.177013	0.00634907	0.395022	-0.379371	3-ketoacyl-CoA synthase, putative, expressed
LOC_Os09g26210	6.17416	4.70605	9.31487	9.39321	7.02429	6.623	3.57964	3.24189	8.12882	6.59393	6.94971	14.5404	0.20447	0.999904	-0.299485	0.558161	0.999971	-0.138205	0.00634938	0.395022	-0.644127	ZOS9-12 - C2H2 zinc finger protein, expressed
LOC_Os02g35730	0.439646	0.461903	0.771001	0.388743	0.419905	0.631285	0.149423	0.518316	0	0.725648	1.2445	1.24914	0.371509	0.999904	-0.624617	0.281956	0.999971	-0.752025	0.00638129	0.395997	-1.9064	expressed protein
LOC_Os03g57660	11.0837	5.48375	4.92655	9.30565	4.88305	4.19053	12.1881	5.7424	6.41345	7.68773	5.0991	4.35227	0.118026	0.999904	0.186792	0.746439	0.999971	0.038639	0.00640863	0.396365	0.32577	peptidase, putative, expressed
LOC_Os10g25400	21.173	19.0024	27.9412	14.4403	21.9808	39.0449	21.9612	33.7215	42.9664	16.1357	19.7442	32.6716	0.855131	0.999904	0.0251918	0.6626	0.999971	0.0602042	0.00641972	0.396365	0.376069	GDSL-like lipase/acylhydrolase, putative, expressed
LOC_Os06g07140	59.1194	59.2771	64.0755	63.5784	56.9966	79.8842	72.7544	70.0294	91.2768	57.3764	62.6823	72.6387	0.479574	0.999904	-0.0508728	0.614403	0.999971	0.0362518	0.00645304	0.397416	0.195999	peptidase, T1 family, putative, expressed
LOC_Os08g17750	0.137841	0.0905996	0.0785494	0.184672	0.0748199	0.0226113	0	0	0	0.0946866	0.0181631	0.0416118	0.339461	0.999904	0.785478	0.581262	0.999971	0.453529	0.00648655	0.398473	-2.23837	retrotransposon protein, putative, Ty1-copia subclass, expressed
LOC_Os08g34300	6.76985	7.57767	6.20753	6.68261	6.89853	6.00051	5.73496	5.5992	4.16274	7.30427	6.5655	5.98146	0.709026	0.999904	0.0343734	0.913209	0.999971	-0.0100396	0.00654303	0.400933	-0.250479	retrotransposon protein, putative, unclassified, expressed
LOC_Os02g13300	28.2951	19.4151	21.8861	26.1464	23.0146	25.7473	29.6884	27.9001	25.0452	22.7174	21.6441	21.5218	0.616123	0.999904	0.0420996	0.124339	0.999971	0.129049	0.00660688	0.403831	0.228071	mitochondrial carrier protein, putative, expressed
LOC_Os04g51792	246.473	172.292	138.348	198.685	129.733	120.842	148.469	107.045	124.104	218.584	144.31	123.973	0.102003	0.999904	0.135218	0.372304	0.999971	-0.073774	0.00668147	0.406733	-0.224284	PAP fibrillin family domain containing protein, expressed
LOC_Os01g17240	257.941	170.362	220.146	299.229	173.836	197.177	219.166	156.698	172.005	278.036	187.885	207.181	0.604244	0.999904	-0.0378401	0.827969	0.999971	-0.015865	0.00668771	0.406733	-0.197996	transporter, major facilitator family, putative, expressed
LOC_Os09g30270	2.57165	1.57531	0.741438	1.73415	1.78704	1.09212	0.860204	1.19673	0.179221	1.317	1.97899	1.45542	0.832724	0.999904	-0.0764386	0.92173	0.999971	-0.0355594	0.00675045	0.409528	-0.980382	transposon protein, putative, Mutator sub-class, expressed
LOC_Os02g12910	1.59743	2.05639	2.4134	1.83295	2.07744	2.2097	0.932461	1.57045	1.20405	1.93283	2.02209	1.96296	0.95311	0.999904	0.0105197	0.854852	0.999971	0.0327268	0.00683307	0.413511	-0.483909	receptor-like protein kinase 5 precursor, putative, expressed
LOC_Os08g40110	121.48	114.822	119.057	131.743	111.562	138.479	143.757	172.838	139.492	110.511	113.19	135.747	0.930044	0.999904	-0.0078466	0.484822	0.999971	0.0624382	0.00686067	0.414154	0.241643	peptidase, putative, expressed
LOC_Os12g41430	51.7297	37.5226	31.6574	45.4704	35.6985	29.2624	35.9818	33.9098	26.072	47.6073	38.9023	30.7624	0.725439	0.999904	0.0247672	0.406387	0.999971	-0.058552	0.00694536	0.417402	-0.19037	expressed protein
LOC_Os10g41040	5.83595	8.58782	8.52738	5.77506	10.4264	11.1109	8.30565	10.6593	12.0488	3.98275	9.01786	10.5446	0.758416	0.999904	0.0397176	0.138172	0.999971	0.191463	0.00694871	0.417402	0.34858	ternary complex factor MIP1, putative, expressed
LOC_Os02g56390	0	0.0203592	0	0.112916	0.0354472	0.0256498	0	0.0319637	0	0.091861	0.152973	0.0627655	0.00449856	0.999904	-2.5589	0.464576	0.999971	-0.658736	0.00698246	0.41769	-2.42989	transposon protein, putative, unclassified, expressed
LOC_Os01g58760	4.02195	2.22112	1.35639	3.48789	1.58825	1.51041	0.946343	0.729482	0	3.12059	1.36618	1.11876	0.653049	0.999904	0.305743	0.784424	0.999971	0.186057	0.0069984	0.41769	-1.83428	bZIP transcription factor domain containing protein, expressed
LOC_Os09g28180	6.45213	7.02511	5.71193	5.40712	8.28755	7.60855	8.61865	9.09798	8.5824	6.63873	6.66832	6.94702	0.556276	0.999904	-0.0577653	0.710676	0.999971	0.0364184	0.00701877	0.41769	0.264679	D-mannose binding lectin family protein, expressed
LOC_Os07g47350	64.5401	100.814	61.3035	95.5223	80.1792	74.8551	93.0098	102.98	74.0061	72.6713	67.8643	57.664	0.325903	0.999904	0.112326	0.0392424	0.999971	0.235723	0.00702201	0.41769	0.308232	potassium transporter, putative, expressed
LOC_Os03g49600	51.3442	43.9299	36.6135	61.9428	35.222	40.8313	67.9459	58.0368	47.9795	51.8735	45.0355	39.7369	0.659635	0.999904	-0.0394144	0.896189	0.999971	-0.0116768	0.00705404	0.418574	0.24112	Os3bglu7 - beta-glucosidase, exo-beta-glucanse, expressed
LOC_Os10g20400	0.485681	0.212612	0.266167	1.87884	0.253681	0.348693	0.619007	0	0	1.22471	0.171851	0.470435	0.549512	0.999904	-0.41189	0.812358	0.999971	0.163372	0.00707974	0.419079	-1.8534	retrotransposon protein, putative, unclassified, expressed
LOC_Os04g57780	16.3662	15.522	16.2264	15.9313	16.8915	16.2429	13.7853	15.6074	10.5239	17.1167	17.2492	19.8708	0.310907	0.999904	-0.117932	0.40977	0.999971	-0.0959334	0.00714765	0.420369	-0.313054	tetratricopeptide repeat domain containing protein, expressed
LOC_Os09g01360	0.66978	0.586406	0.449459	0.619426	0.840431	0.382731	0.325198	0.264745	0.0159343	0.839773	0.41788	0.538422	0.967543	0.999904	-0.0231111	0.972374	0.999971	0.0196697	0.00715656	0.420369	-1.52756	expressed protein
LOC_Os04g08550	13.7251	21.3314	29.8626	17.5407	24.4533	38.5824	21.1739	30.7641	50.2953	18.5071	27.1947	25.9142	0.247529	0.999904	-0.133621	0.481207	0.999971	0.0813902	0.00717294	0.420369	0.310684	oxidoreductase, aldo/keto reductase family protein, putative, expressed
LOC_Os10g01660	0	0.137701	0	0.104302	0.150217	0	0	0	0	0.317281	0.195891	0.121873	0.0571647	0.999904	-1.91807	0.241362	0.999971	-1.18145	0.00717472	0.420369	-2.71127	transferase family protein, putative, expressed
LOC_Os05g34040	27.3187	16.1134	6.44119	11.4327	15.9402	7.78264	9.24433	8.44301	4.99912	17.9502	14.7917	7.46142	0.551395	0.999904	0.119064	0.584541	0.999971	-0.109288	0.0071877	0.420369	-0.537285	monooxygenase, putative, expressed
LOC_Os07g38960	1173.62	548.075	429.288	604.559	386.596	394.474	471.949	314.37	411.886	901.413	513.008	455.97	0.557314	0.999904	0.0894679	0.0726241	0.999971	-0.273691	0.00730419	0.42616	-0.408991	chlorophyll A-B binding protein, putative, expressed
LOC_Os10g21268	432.151	715.426	1066.84	219.041	625.213	1121.12	233.624	574.776	1064.49	364.276	861.601	1373.4	0.509096	0.999904	-0.0896459	0.0117641	0.999971	-0.342041	0.00732786	0.42652	-0.364094	ribulose bisphosphate carboxylase large chain precursor, putative, expressed
LOC_Os02g41630	209.188	166.163	154.753	189.081	129.53	254.808	285.742	219.849	299.688	211.787	159.319	188.673	0.678053	0.999904	-0.0565891	0.973176	0.999971	-0.00458372	0.00737847	0.426874	0.365236	phenylalanine ammonia-lyase, putative, expressed
LOC_Os01g02730	3.38509	4.2417	5.24145	3.14757	3.7527	2.98967	2.41968	2.05876	1.75382	2.95618	3.97391	2.84512	0.102135	0.999904	0.269257	0.901964	0.999971	0.0202908	0.00737918	0.426874	-0.441334	TAK14, putative, expressed
LOC_Os02g08530	0.330286	0.784896	0.620591	0.886566	0.760475	0.728322	0.400909	0.357601	0.110007	0.973477	0.70788	0.441791	0.556315	0.999904	-0.208834	0.655562	0.999971	0.158332	0.00740104	0.426874	-0.950682	protein kinase family protein, putative, expressed
LOC_Os09g25550	18.3119	11.3134	8.24008	8.43317	11.8252	5.92015	8.49329	7.27401	5.66307	12.9144	11.5638	7.62999	0.356045	0.999904	0.134249	0.1358	0.999971	-0.21697	0.00741605	0.426874	-0.389476	pentatricopeptide, putative, expressed
LOC_Os10g32770	22.1172	25.9327	36.4086	23.2784	24.2063	30.2481	21.7936	17.6148	28.0524	23.3945	23.5053	36.9742	0.913174	0.999904	0.00846996	0.465223	0.999971	-0.0567281	0.00742996	0.426874	-0.207946	WD repeat-containing protein, putative, expressed
LOC_Os09g26620	868.391	704.254	229.405	982.084	905.43	305.122	1321.96	900.294	313.81	967.621	708.242	290.131	0.144485	0.999904	-0.116657	0.186251	0.999971	0.105662	0.00743896	0.426874	0.213963	auxin-repressed protein, putative, expressed
LOC_Os05g25060	32.3918	30.9436	19.538	27.0217	29.6261	16.9304	25.2269	23.1472	14.7719	29.6347	29.0119	17.9014	0.258653	0.999904	0.0798463	0.568485	0.999971	-0.0403115	0.00746229	0.427207	-0.189121	PPR repeat domain containing protein, putative, expressed
LOC_Os07g33240	42.9442	50.2419	37.4064	57.5679	36.7736	43.2187	73.7126	65.677	50.1244	45.2303	50.37	39.7101	0.757112	0.999904	-0.0384697	0.962781	0.999971	0.00580439	0.00750314	0.42854	0.332566	endoribonuclease, putative, expressed
LOC_Os01g63910	32.5482	22.9174	16.9885	29.1558	25.5407	17.0218	27.101	17.0402	13.7332	32.1741	20.3181	17.4151	0.622208	0.999904	0.0352719	0.597052	0.999971	0.0378434	0.00758896	0.432429	-0.191122	AT hook motif family protein, expressed
LOC_Os03g51870	1.19932	1.30281	0.973716	0.540048	0.928041	0.478359	0.377419	0.617189	0.258904	1.22192	0.943025	0.588005	0.367371	0.999904	0.266107	0.25002	0.999971	-0.339583	0.00761153	0.432704	-0.787873	FHA domain containing protein, putative, expressed
LOC_Os09g36810	1.15569	1.0274	0.857462	1.19875	0.827853	0.829728	1.38986	1.18283	1.86539	0.831478	0.996521	0.619984	0.311927	0.999904	0.225453	0.479097	0.999971	0.157801	0.00762998	0.432744	0.594859	beta-galactosidase precursor, putative, expressed
LOC_Os08g38010	4.33443	5.05997	4.80245	4.74698	4.22725	4.73624	2.99586	2.67898	1.64895	3.30802	5.65646	4.73881	0.809532	0.999904	0.0563319	0.915528	0.999971	0.0247895	0.00766879	0.432808	-0.623152	expressed protein
LOC_Os01g05800	250.66	196.464	193.011	221.964	188.476	176.918	169.457	152.064	164.972	250.895	186.445	163.803	0.322928	0.999904	0.0713931	0.895342	0.999971	-0.0095013	0.00767856	0.432808	-0.192548	inner membrane protein, putative, expressed
LOC_Os02g39850	53.826	32.7367	41.5763	61.9463	30.8054	56.4695	61.1942	44.8024	72.3415	59.5602	31.6378	48.692	0.440672	0.999904	-0.0754399	0.569559	0.999971	0.0556414	0.00770538	0.432808	0.260714	transferase family protein, putative, expressed
LOC_Os08g01160	12.0871	2.45391	0.384004	6.67977	2.71879	1.57208	4.76295	0.958849	0	9.55742	2.82644	1.41397	0.57062	0.999904	-0.380172	0.887143	0.999971	-0.0951334	0.00773696	0.432808	-1.78532	membrane associated DUF588 domain containing protein, putative, expressed
LOC_Os01g61460	17.4264	25.3953	25.4086	23.2242	28.3034	28.6463	28.8761	32.4076	34.4787	23.2465	28.3947	27.2105	0.0363238	0.999904	-0.156467	0.811849	0.999971	0.017793	0.00775404	0.432808	0.199022	leaf senescence related protein, putative, expressed
LOC_Os01g17170	339.88	116.267	165.107	150.325	84.5984	143.944	73.4891	61.5916	152.503	326.283	114.951	170.722	0.98325	0.999904	0.0058238	0.134349	0.999971	-0.41531	0.00775416	0.432808	-0.738595	magnesium-protoporphyrin IX monomethyl ester cyclase,chloroplast precursor, putative, expressed
LOC_Os05g12630	54.0138	7.55501	23.3774	29.3244	9.43072	6.72907	15.2043	6.17766	15.0792	42.8481	18.0947	29.1057	0.405246	0.999904	-0.28693	0.016232	0.999971	-0.828655	0.00775945	0.432808	-0.917842	expressed protein
LOC_Os05g40150	1.63675	1.31906	1.2801	1.78324	1.13192	0.962329	0.948248	0.928866	0.468954	1.54691	1.27967	0.974459	0.532223	0.999904	0.118846	0.981481	0.999971	0.00441665	0.00777307	0.432808	-0.506457	RGH2B, putative, expressed
LOC_Os12g15290	0.382899	0.131005	0.369781	0.248913	0.0890932	0.0894748	0	0.154666	0	0.293329	0.195023	0.178487	0.824407	0.999904	0.195458	0.559618	0.999971	-0.513934	0.00779805	0.433209	-2.34384	retrotransposon protein, putative, Ty1-copia subclass
LOC_Os06g21610	0.135804	0	0.148611	0.136073	0.156871	0.0388153	0	0.0471691	0	0.209204	0.282038	0.232699	0.161946	0.999904	-1.64508	0.447696	0.999971	-0.893098	0.00787228	0.436339	-3.12594	transposon protein, putative, unclassified, expressed
LOC_Os09g35000	5.52258	4.45523	3.28594	5.31917	3.64985	2.88873	4.6924	4.00281	1.56347	5.49805	5.56077	3.235	0.653763	0.999904	-0.0675117	0.214906	0.999971	-0.186666	0.00791907	0.437222	-0.399691	flap endonuclease, putative, expressed
LOC_Os02g51020	181.166	59.8137	13.8134	64.5984	56.7681	13.7985	50.5968	23.4367	12.4266	125.867	58.447	15.8694	0.749449	0.999904	0.0824669	0.284286	0.999971	-0.276487	0.00792406	0.437222	-0.68565	expressed protein
LOC_Os05g03630	9.73827	8.38964	9.26475	9.60099	8.41742	13.4797	10.7236	8.75824	16.8921	8.82245	7.5641	9.00495	0.535469	0.999904	0.0763421	0.104508	0.999971	0.199994	0.00796624	0.438557	0.3269	dnaJ domain containing protein, expressed
LOC_Os12g03350	28.3517	27.574	36.0101	43.326	22.6648	39.1044	25.0841	21.3309	18.6417	37.1152	27.2686	32.6834	0.716538	0.999904	-0.0541351	0.728479	0.999971	0.0517584	0.00801641	0.439989	-0.395309	expressed protein
LOC_Os03g27370	1.02726	0.64434	0.857057	0.932051	0.274573	1.05675	1.01614	1.08455	1.12602	0.759193	0.355888	0.534636	0.0942732	0.999904	0.450358	0.434622	0.999971	0.210287	0.00802833	0.439989	0.713478	phospholipase D, putative, expressed
LOC_Os03g45720	92.5984	92.0254	128.265	96.7024	88.0444	153.981	104.278	120.047	152.095	78.3536	99.3056	135.581	0.880625	0.999904	0.0113674	0.325267	0.999971	0.0744589	0.00805481	0.44045	0.20057	glyoxalase family protein, putative, expressed
LOC_Os06g06180	1.39898	2.51588	3.4397	1.797	3.06957	3.2032	1.92759	3.53424	5.11288	1.21347	2.07636	2.61246	0.338032	0.999904	0.201091	0.117662	0.999971	0.328413	0.00815228	0.44459	0.555315	transferase family protein, putative, expressed
LOC_Os09g30340	363.845	151.736	106.848	171.216	102.836	99.6979	104.855	65.3813	120.344	326.379	133.552	135.35	0.998464	0.999904	-0.000474472	0.102853	0.999971	-0.40198	0.00816698	0.44459	-0.651845	photosystem I reaction center subunit, chloroplast precursor, putative, expressed
LOC_Os07g17970	2.05109	1.0271	2.70473	1.87913	1.42464	2.32524	1.70505	0.80866	1.78505	2.3955	1.5424	3.59149	0.180995	0.999904	-0.280185	0.234636	0.999971	-0.248935	0.00823114	0.446537	-0.553467	AMP-binding domain containing protein, expressed
LOC_Os10g17230	0.0171278	0.0698703	0.193019	0.0697151	0.148202	0.287473	0	0.187855	0	0.314098	0.212898	0.319071	0.139732	0.999904	-1.33578	0.496577	0.999971	-0.614968	0.00824788	0.446537	-2.38951	retrotransposon protein, putative, Ty3-gypsy subclass
LOC_Os08g43940	0.178291	0.234146	0.879376	0.19706	0.745	0.384011	0	0.375348	0	0.490458	0.656092	0.863471	0.444138	0.999904	-0.601329	0.542262	0.999971	-0.478876	0.00827532	0.446537	-2.07506	carrier, putative, expressed
LOC_Os01g01290	1.26315	0.378338	0.546505	0.587841	0.238111	0.262516	0.282438	0.13996	0	0.579128	0.771571	0.150254	0.468723	0.999904	0.431896	0.739354	0.999971	-0.198321	0.00829819	0.446537	-1.57347	histone-like transcription factor and archaeal histone, putative, expressed
LOC_Os06g36270	16.2742	16.9572	19.4018	19.8608	18.7117	25.4602	18.2045	22.7298	25.1025	17.0481	18.3282	19.3672	0.554164	0.999904	-0.041229	0.0302757	0.999971	0.151	0.00833824	0.446537	0.183869	receptor-like protein kinase 5 precursor, putative, expressed
LOC_Os08g32160	6.03526	4.9142	1.07386	2.33904	2.22243	2.33531	6.06038	7.88745	5.07103	1.65304	3.39459	2.00288	0.371819	0.999904	0.346171	0.944069	0.999971	0.0271942	0.00835687	0.446537	1.02227	oxidoreductase, 2OG-FeII oxygenase domain containing protein, putative, expressed
LOC_Os02g01340	541.435	382.318	401.073	488.876	273.434	335.514	357.462	222.608	352.945	494.718	352.68	350.394	0.294373	0.999904	0.101568	0.296119	0.999971	-0.101201	0.00835982	0.446537	-0.255443	ferredoxin--NADP reductase, chloroplast precursor, putative, expressed
LOC_Os01g05150	0.299222	0.392962	0.737917	0.826804	0.714466	0.805595	0	0.629937	0	0.685936	0.550551	0.724571	0.641739	0.999904	-0.356455	0.816375	0.999971	0.177902	0.00836006	0.446537	-2.02041	expressed protein
LOC_Os12g05260	207.805	130.235	228.772	309.857	182.97	328.752	266.435	206.647	333.764	281.588	147.602	219.236	0.151564	0.999904	-0.12923	0.00759681	0.999971	0.240565	0.00836898	0.446537	0.237621	phytosulfokines precursor, putative, expressed
LOC_Os04g35130	19.2983	24.2143	24.1095	21.0706	24.2128	31.0583	27.1627	32.527	31.1466	20.7885	23.4616	30.0179	0.280204	0.999904	-0.0877184	0.726694	0.999971	0.0283924	0.00840495	0.446537	0.214073	expressed protein
LOC_Os01g62970	9.59559	4.92982	11.7486	11.5321	11.3728	10.5928	7.03829	5.21283	5.75493	14.1795	6.46057	10.9461	0.313619	0.999904	-0.196655	0.571561	0.999971	0.110413	0.00841396	0.446537	-0.514245	expressed protein
LOC_Os12g04570	0.352404	0.308537	0.28969	1.07113	0.525907	0.379511	1.34743	0.519329	2.05404	0.242355	0.548649	0	0.357821	0.999904	0.643438	0.0775235	0.999971	1.23523	0.00842245	0.446537	1.8436	expressed protein
LOC_Os10g38590	31.2698	25.5815	24.9636	28.7323	26.692	34.8674	33.7347	30.7127	38.9174	28.3245	25.3268	27.4793	0.966406	0.999904	0.00387271	0.259832	0.999971	0.10361	0.00844217	0.446611	0.242187	glutathione S-transferase, N-terminal domain containing protein, expressed
LOC_Os02g53870	1.09813	0.887476	2.31463	1.027	1.2606	1.51615	0.143546	1.33065	0.0984707	2.09133	1.42335	1.41821	0.743939	0.999904	-0.2022	0.690329	0.999971	-0.246626	0.00847274	0.447055	-1.62967	expressed protein
LOC_Os05g44340	3.47322	4.94786	7.22653	1.6917	4.87575	7.22717	3.42629	6.76669	11.3058	3.06335	2.83283	5.74002	0.151134	0.999904	0.303591	0.769047	0.999971	0.0620958	0.00848722	0.447055	0.556631	heat shock protein 101, putative, expressed
LOC_Os03g37450	13.7651	3.91679	1.88592	5.32499	3.28677	0.494132	4.67836	1.15916	0	8.51992	3.70165	2.22217	0.823138	0.999904	0.124469	0.263517	0.999971	-0.62266	0.00852738	0.448202	-1.46485	expressed protein
LOC_Os12g34012	0.946917	0.829045	1.98139	0.380582	0.308318	1.54508	0	0.0724908	1.70595	0.78935	1.1209	1.3341	0.891034	0.999904	0.0897659	0.376376	0.999971	-0.579627	0.00854643	0.448237	-1.72309	cytochrome c biosynthesis ccmC-like mitochondrial protein, putative, expressed
LOC_Os07g28790	33.4911	22.1552	21.8908	31.911	18.4105	22.3134	20.3756	18.5921	16.5907	32.0804	18.8644	21.2536	0.386649	0.999904	0.0773029	0.925193	0.999971	0.00838419	0.00857219	0.448433	-0.234724	PAP fibrillin family domain containing protein, expressed
LOC_Os08g05280	5.53915	6.86297	6.45043	5.2658	6.70603	3.8586	4.80053	4.11711	3.52384	6.5049	6.44026	4.52286	0.495488	0.999904	0.0853811	0.390066	0.999971	-0.107665	0.00858693	0.448433	-0.329205	oxidoreductase family, NAD-binding Rossmann fold containing protein, expressed
LOC_Os01g44069	0.167776	0.419688	0.367782	0.450349	0.48645	0.412985	0.12219	0.181651	0	0.219777	0.583473	0.57265	0.639419	0.999904	-0.337358	0.925824	0.999971	0.0670381	0.00865802	0.450442	-1.89036	glycerol-3-phosphate acyltransferase, putative, expressed
LOC_Os08g02909	4.91092	0	0	3.81963	2.49721	2.87286	1.23635	0	0	2.50173	2.05931	4.22822	0.028847	0.999904	-2.19588	0.940048	0.999971	0.0755637	0.00866235	0.450442	-2.63748	expressed protein
LOC_Os01g09430	147.896	117.353	83.9934	124.615	110.527	66.6806	110.029	79.5641	74.9968	132.796	112.774	80.9236	0.423706	0.999904	0.0611344	0.237034	0.999971	-0.0903582	0.00871441	0.450822	-0.200447	expressed protein
LOC_Os09g32840	17.7549	13.1519	11.3557	19.1557	17.327	13.5685	21.9988	15.8078	19.6107	19.3696	14.3219	10.9588	0.658729	0.999904	-0.0459715	0.201488	0.999971	0.132952	0.00872775	0.450822	0.27297	nucleotide pyrophosphatase/phosphodiesterase, putative, expressed
LOC_Os10g12354	44.4049	30.0396	18.5551	31.2526	30.3907	16.4727	29.18	25.7467	14.1489	35.8235	28.8941	18.4101	0.233074	0.999904	0.0867027	0.381312	0.999971	-0.0636546	0.00873347	0.450822	-0.190664	endonuclease, putative, expressed
LOC_Os05g03900	24.3397	17.1391	18.5681	24.4706	16.612	12.6581	24.1218	10.4211	7.45787	26.5372	15.5057	18.9442	0.988626	0.999904	-0.0025579	0.447668	0.999971	-0.136239	0.00874603	0.450822	-0.470421	WRKY109, expressed
LOC_Os08g42910	17.9285	24.7989	31.7361	16.5554	24.8138	36.8468	21.8037	29.2359	37.86	18.068	24.9858	28.8361	0.741098	0.999904	0.0264128	0.512879	0.999971	0.052311	0.00877888	0.450822	0.209492	peptidase, M24 family protein, putative, expressed
LOC_Os05g38860	6.95768	7.18671	2.06446	12.5289	9.51992	3.76047	16.3404	13.8906	4.46548	12.258	7.43542	2.52407	0.159609	0.999904	-0.265763	0.238519	0.999971	0.222736	0.00878097	0.450822	0.495186	expressed protein
LOC_Os10g38276	15.6842	7.36433	10.8385	9.29994	8.34457	5.96919	8.85152	8.12452	2.88357	16.7345	10.3823	8.55127	0.817122	0.999904	-0.0572829	0.120191	0.999971	-0.384937	0.00881504	0.450822	-0.648793	chloroplast ATP synthase a chain precursor, putative, expressed
LOC_Os10g34430	1.28131	0.940114	0.721975	1.44612	0.899523	0.570088	1.10403	0.767454	0.368157	1.29075	1.21581	0.839047	0.444822	0.999904	-0.138103	0.297484	0.999971	-0.188308	0.00881753	0.450822	-0.47338	Dicer, putative, expressed
LOC_Os08g36410	0.500186	0.0796223	0.0996783	0.402067	0.0814308	0.489691	0.540904	0.344624	0.848118	0.0416955	0.0257431	0.146813	0.257347	0.999904	0.856252	0.0910796	0.999971	1.27735	0.00891284	0.454741	1.97709	ANTH domain containing protein, expressed
LOC_Os03g45779	36.635	7.98863	3.45895	19.7909	6.55244	3.20155	13.1157	6.41271	2.5192	25.1003	8.07866	3.47761	0.428222	0.999904	0.120033	0.250211	0.999971	-0.174213	0.00894328	0.455342	-0.396082	expressed protein
LOC_Os04g17479	144.462	75.2609	64.263	160.223	77.4466	49.2368	132.252	58.5342	38.0061	152.097	68.7701	56.1673	0.508583	0.999904	0.0573297	0.861663	0.999971	0.0151126	0.00897173	0.455839	-0.226626	expressed protein
LOC_Os03g03670	14.6463	6.87524	18.6553	24.9887	5.01464	13.426	7.01366	3.93692	12.6455	19.8939	8.89146	14.6464	0.672431	0.999904	-0.107388	0.577682	0.999971	-0.141411	0.00905404	0.45891	-0.662898	expressed protein
LOC_Os06g48570	13.7433	12.2988	10.7923	14.7069	11.9824	11.1089	18.154	13.206	12.0323	12.7764	11.1812	10.3475	0.422684	0.999904	0.0696194	0.270783	0.999971	0.0956243	0.00908123	0.45891	0.226542	Ser/Thr protein phosphatase family protein, putative, expressed
LOC_Os09g14600	85.0178	61.2332	82.6339	85.5631	59.5339	77.9318	63.916	49.57	75.3905	81.3434	66.692	80.8966	0.926005	0.999904	-0.00708521	0.680907	0.999971	-0.0313724	0.00913759	0.45891	-0.198878	peroxisomal membrane protein-related, putative, expressed
LOC_Os01g15390	2.86838	2.43032	1.77479	2.40333	1.24276	2.79008	4.24544	3.50632	5.2853	2.58777	2.40966	2.27047	0.838127	0.999904	-0.0448158	0.432093	0.999971	-0.172344	0.00913936	0.45891	0.571864	expressed protein
LOC_Os04g33070	35.1113	23.3205	28.5312	28.102	23.8502	38.2467	32.9194	32.6259	45.8701	18.3182	11.9952	36.7454	0.129705	0.999904	0.348494	0.0970185	0.999971	0.381662	0.00916292	0.45891	0.59933	expressed protein
LOC_Os03g63580	0.187039	0.245635	7.17519	0.241184	1.22816	4.81186	0.105949	0.288761	1.59894	0.828954	0.529449	5.25387	0.190757	0.999904	-0.620869	0.752036	0.999971	-0.149935	0.00919454	0.45891	-1.23607	phosphoesterase family protein, putative, expressed
LOC_Os08g14460	11.6172	8.80968	11.1457	11.6008	7.66038	9.81923	8.47562	7.75043	5.75556	10.5321	8.58669	10.191	0.53013	0.999904	0.0705892	0.885803	0.999971	-0.0161479	0.00919646	0.45891	-0.292862	expressed protein
LOC_Os10g37170	2.12494	1.34364	2.09614	2.21815	1.81107	1.75443	2.16661	1.37188	1.04589	3.18252	1.95822	1.73044	0.212042	0.999904	-0.196211	0.375149	0.999971	-0.139437	0.00919803	0.45891	-0.409507	retrotransposon protein, putative, unclassified, expressed
LOC_Os11g36440	51.2015	35.0877	31.0667	37.9914	35.8976	24.3354	34.6416	26.7722	23.9659	46.1345	33.1369	25.7248	0.104276	0.999904	0.11623	0.446221	0.999971	-0.0545016	0.00921199	0.45891	-0.186322	amine oxidase, flavin-containing, domain containing protein, expressed
LOC_Os06g21740	0.727543	0.616094	0.522903	1.07044	0.455656	0.395955	0.56258	0.542358	0.180747	1.0525	0.641466	0.55798	0.51383	0.999904	-0.157529	0.365575	0.999971	-0.218309	0.00922035	0.45891	-0.628241	retrotransposon protein, putative, Ty3-gypsy subclass, expressed
LOC_Os01g70170	421.855	453.963	381.702	411.026	401.491	503.007	537.808	610.35	483.827	416.437	446.932	438.245	0.6702	0.999904	-0.036967	0.927553	0.999971	0.00789242	0.00924472	0.459186	0.225936	transaldolase, putative, expressed
LOC_Os05g11900	25.0799	29.2246	35.414	25.0279	32.7659	44.9503	35.414	43.9109	59.6295	26.567	37.9992	41.3614	0.126087	0.999904	-0.15871	0.703844	0.999971	-0.0394397	0.00939028	0.465468	0.269496	expressed protein
LOC_Os12g28065	0.817852	0.716046	0.689546	1.66883	0.826195	1.62602	0.320727	0.582757	0.073338	0.749938	1.17535	1.29998	0.514956	0.999904	-0.337963	0.670447	0.999971	0.220866	0.00942096	0.466041	-1.34761	expressed protein
LOC_Os12g07370	20.5123	13.8873	5.71925	13.2175	12.8725	5.77344	11.2664	8.17048	5.00179	15.4711	11.9262	5.7469	0.176645	0.999904	0.142667	0.824381	0.999971	-0.0234316	0.00944251	0.466162	-0.274066	csAtPR5, putative, expressed
LOC_Os01g43070	77.34	47.2662	30.6868	55.1283	43.7481	27.3336	51.5361	32.654	26.2905	63.0358	46.8349	27.098	0.132514	0.999904	0.112222	0.402484	0.999971	-0.0624566	0.00947	0.466574	-0.193564	psbP-related thylakoid lumenal protein 4, chloroplast precursor, putative, expressed
LOC_Os01g65520	25.4876	24.8498	54.4537	23.9324	34.5199	64.6261	23.9723	33.8871	56.0123	21.3235	24.238	47.5833	0.163495	0.999904	0.112267	0.00122991	0.999971	0.260389	0.00952779	0.467284	0.208878	Sad1 / UNC-like C-terminal domain containing protein, putative, expressed
LOC_Os03g04190	2.7419	0.673337	1.24609	0.997865	0.718571	4.34519	1.70468	1.66132	5.34019	0.459918	0.359678	2.35354	0.213019	0.999904	0.578472	0.142112	0.999971	0.681906	0.00953604	0.467284	1.20414	cytochrome P450, putative, expressed
LOC_Os03g01014	146.353	95.5203	128.021	124.784	72.5492	104.439	70.7301	62.6076	101.649	128.809	79.6451	105.727	0.136058	0.999904	0.166477	0.695483	0.999971	-0.0437151	0.00958778	0.467284	-0.289296	expressed protein
LOC_Os08g31030	0.411525	0.340282	0.526229	0.277962	0.409424	0.213383	0.194257	0.211777	0.0266515	0.41928	0.465958	0.310027	0.892956	0.999904	0.0633348	0.533716	0.999971	-0.292915	0.00958923	0.467284	-1.21916	HOTHEAD precursor, putative, expressed
LOC_Os08g06850	0.881533	0	0.100711	0.289773	0	1.02628	0	0.000115512	8.29239e-07	0.0688304	0.779467	0.661007	0.364032	0.999904	-1.39883	0.51335	0.999971	-1.00728	0.00960541	0.467284	-3.99091	retrotransposon protein, putative, Ty1-copia subclass, expressed
LOC_Os11g03600	1.80603	2.11613	2.22131	1.52088	1.83331	3.07975	2.24177	3.71227	4.49322	1.2885	2.78224	1.7771	0.679795	0.999904	0.0938594	0.658644	0.999971	0.100464	0.00960795	0.467284	0.588892	harpin-induced protein 1 domain containing protein, expressed
LOC_Os09g10690	2.69783	0.566881	1.18279	1.25237	0.644173	0.774759	1.28368	0.181747	1.25797	3.41385	0.702576	2.16019	0.329865	0.999904	-0.344911	0.0507672	0.999971	-0.691475	0.00961852	0.467284	-0.916537	expressed protein
LOC_Os12g17600	2598.61	272.838	311.848	717.516	235.058	244.081	255.25	114.721	257.925	2151.28	245.662	358.781	0.902341	0.999904	0.0507795	0.220482	0.999971	-0.507052	0.00969045	0.469842	-1.07046	ribulose bisphosphate carboxylase small chain, chloroplast precursor, putative, expressed
LOC_Os05g45954	0.616787	0.648011	2.70413	0.590822	1.59546	2.30266	0.209627	0.727155	0.719006	0.791797	1.48986	2.52246	0.422404	0.999904	-0.330807	0.807232	0.999971	-0.100612	0.00971491	0.470094	-1.06625	AP2 domain containing protein, expressed
LOC_Os01g65902	27.0136	12.8519	18.4913	16.8441	12.8395	11.5268	18.2756	10.859	6.71403	24.0226	15.38	13.1834	0.579987	0.999904	0.0915012	0.181526	0.999971	-0.220909	0.00973845	0.4703	-0.427407	apocytochrome f precursor, putative, expressed
LOC_Os06g12390	13.7552	12.8665	23.6326	12.1808	12.8607	25.4522	12.9205	15.5383	29.0709	12.0015	13.7209	20.0681	0.297128	0.999904	0.0780703	0.38811	0.999971	0.0646247	0.00981476	0.472999	0.19336	galactosyltransferase family protein, putative, expressed
LOC_Os12g25180	95.7135	91.7239	84.1636	77.7609	72.3397	78.5992	68.2002	61.9543	87.8569	92.0183	90.3751	87.4316	0.953913	0.999904	0.00492966	0.0549233	0.999971	-0.163729	0.00983314	0.472999	-0.22021	expressed protein
LOC_Os07g22860	0.194752	0.0153193	0.222517	0.255873	0	0.0852945	0.849316	0.0921003	0.385071	0.106935	0.0216337	0.0464719	0.381922	0.999904	0.591278	0.989067	0.999971	0.00926646	0.00985604	0.473167	1.74527	transposon protein, putative, CACTA, En/Spm sub-class, expressed
LOC_Os06g12560	1.78237	1.84059	2.50458	1.36385	2.29161	4.56079	2.79588	2.50156	6.87259	1.42483	2.43211	2.56749	0.901586	0.999904	-0.026955	0.4675	0.999971	0.158374	0.00992598	0.475589	0.562039	zinc finger, C3HC4 type, domain containing protein, expressed
LOC_Os01g16910	56.1683	51.7786	45.2757	60.6259	51.3152	44.0262	69.3656	66.878	54.0306	54.9193	58.3584	45.5501	0.626003	0.999904	-0.034816	0.788071	0.999971	-0.0192036	0.0100244	0.478476	0.183951	outer mitochondrial membrane porin, putative, expressed
LOC_Os05g37060	0.24649	0.161855	0.472791	1.4303	0.638926	0.608951	0.314155	0.155677	0.14367	2.14721	0.359668	1.11418	0.0381376	0.999904	-1.20419	0.802738	0.999971	-0.145083	0.0100255	0.478476	-1.4955	MYB family transcription factor, putative, expressed
LOC_Os08g43930	0.792753	1.06168	1.24547	1.09644	1.06554	0.366042	0	0.667578	0	0.581539	0.691817	0.358338	0.360024	0.999904	0.628032	0.611147	0.999971	0.348855	0.0100588	0.478747	-1.76597	carrier, putative, expressed
LOC_Os03g32690	0.208341	0.290716	0.257505	0.197618	0.335437	0.073352	0.0434053	0.0430183	0	0.210791	0.207906	0.101108	0.54994	0.999904	0.393168	0.951703	0.999971	0.0398316	0.0100704	0.478747	-1.69236	retrotransposon protein, putative, unclassified, expressed
LOC_Os12g06340	10.106	11.2252	3.92097	10.0255	8.91334	3.68951	9.34854	10.7055	5.55152	7.89174	7.83908	4.02497	0.0673331	0.999904	0.1928	0.364493	0.999971	0.0955692	0.0101184	0.478956	0.27103	BEL1-like homeodomain transcription factor, putative, expressed
LOC_Os03g64140	21.2773	11.7086	5.20959	9.24115	7.20279	3.56905	9.15687	5.36876	3.4977	13.5624	8.20525	4.84875	0.0462477	0.999904	0.291633	0.0643893	0.999971	-0.270614	0.0101304	0.478956	-0.376238	expressed protein
LOC_Os01g71256	0.158481	0.104065	0.108565	0.153269	0.15373	0.199117	0.0673287	0	0	0.145321	0.134583	0.0639608	0.883321	0.999904	0.106494	0.571667	0.999971	0.410414	0.0101659	0.478956	-1.86496	expressed protein
LOC_Os11g06770	15.6275	17.4981	15.7357	12.0409	18.36	18.3476	17.5174	30.0603	19.8471	10.9695	14.8209	20.4065	0.566286	0.999904	0.0861518	0.646107	0.999971	0.0689746	0.0101748	0.478956	0.386023	ethylene-responsive transcription factor ERF110, putative, expressed
LOC_Os03g58100	18.5998	13.5237	6.64246	11.9535	13.6323	6.08433	10.9685	7.67587	4.10673	14.3219	9.38639	7.46091	0.214012	0.999904	0.169566	0.989717	0.999971	-0.00175866	0.0101892	0.478956	-0.350611	pentatricopeptide, putative, expressed
LOC_Os03g27010	53.1776	58.3225	65.4199	48.2996	51.8533	79.1449	56.4715	69.2067	78.7641	49.2504	56.2247	65.1872	0.585918	0.999904	0.0385259	0.638333	0.999971	0.033241	0.010193	0.478956	0.181697	expressed protein
LOC_Os02g40680	5.16083	5.43079	6.85313	5.86867	10.5751	7.23227	6.66188	8.44115	10.9332	4.91429	6.93913	5.3513	0.916828	0.999904	0.0165645	0.0576728	0.999971	0.301084	0.0102123	0.478956	0.407418	mis12 protein, expressed
LOC_Os06g48660	0.445325	0.503609	0.264387	0.389662	0.443051	0.279754	0.126127	0.203129	0.064891	0.476403	0.441201	0.227654	0.867832	0.999904	0.0690662	0.991995	0.999971	0.00416412	0.0102401	0.479337	-1.06564	DEFL21 - Defensin and Defensin-like DEFL family, expressed
LOC_Os02g12070	69.7912	130.433	119.891	83.0721	139.805	84.3136	77.546	72.3338	51.6308	73.8413	197.937	107.034	0.579614	0.999904	-0.120214	0.478449	0.999971	-0.153819	0.0103189	0.4821	-0.55663	expressed protein
LOC_Os03g52770	22.9403	21.2688	22.6987	23.4138	23.3929	18.9038	29.0735	25.0276	26.2917	22.791	22.8919	21.3581	0.972495	0.999904	-0.00247661	0.75489	0.999971	-0.0224247	0.0104467	0.48535	0.18393	expressed protein
LOC_Os01g65030	1.37864	1.44542	1.5211	1.52112	1.52265	0.908597	1.47924	1.2129	0.881087	2.05821	1.96957	1.73848	0.144272	0.999904	-0.280338	0.0378898	0.999971	-0.398607	0.0104521	0.48535	-0.491625	S-locus-specific glycoprotein precursor, putative, expressed
LOC_Os02g21350	3.27895	1.08624	2.03978	4.50568	2.11603	2.48136	3.76492	1.56717	1.54961	7.15099	3.46181	3.6052	0.00464624	0.999904	-0.823466	0.134434	0.999971	-0.435457	0.0104644	0.48535	-0.744774	pleiotropic drug resistance protein 5, putative, expressed
LOC_Os11g39670	28.7211	22.0322	15.7712	21.3555	22.1443	15.4212	19.4205	16.3648	13.3207	24.1375	22.3511	14.6622	0.334959	0.999904	0.0770016	0.753913	0.999971	-0.0250357	0.010468	0.48535	-0.204447	seryl-tRNA synthetase, putative, expressed
LOC_Os02g42430	0.275607	1.12606	1.00693	0.913863	1.75488	0.593613	0	2.47561	0	0.673922	2.23645	1.7797	0.426725	0.999904	-0.678823	0.697328	0.999971	-0.332173	0.0105977	0.488297	-2.18274	GEM, putative, expressed
LOC_Os03g63090	21.9724	22.7127	20.6551	18.3471	22.1874	21.1006	22.9621	21.9808	27.5303	17.6478	20.1119	19.2114	0.145599	0.999904	0.137196	0.402415	0.999971	0.0789388	0.0106044	0.488297	0.24092	actin-related protein 2/3 complex subunit 4, putative, expressed
LOC_Os03g07890	7.47967	3.41791	3.34397	6.12779	3.01576	3.06185	5.63057	3.20457	3.97721	12.8147	3.82592	4.82991	0.0275788	0.999904	-0.339174	0.00208622	0.999971	-0.47379	0.0106472	0.488297	-0.393184	mitochondrial carrier protein, putative, expressed
LOC_Os09g29150	0.0978474	0.171335	0	0.540741	0.0584088	0.0702493	0	0	0	1.16639	0.387765	0.442287	0.0943036	0.999904	-1.75112	0.249465	0.999971	-1.20534	0.0106506	0.488297	-2.67302	expressed protein
LOC_Os12g42300	56.6156	37.5459	57.4801	54.8834	46.9661	59.1304	37.8607	35.8695	43.5614	57.5281	36.6217	52.3628	0.673671	0.999904	0.0336204	0.169065	0.999971	0.109793	0.0106669	0.488297	-0.203857	potasium efflux antiporter protein, putative, expressed
LOC_Os11g07830	0.872755	0.844548	1.46005	0.913863	0.16452	1.25318	0.624471	0.27077	0.321283	1.2636	1.11822	1.63139	0.59722	0.999904	-0.249523	0.0917005	0.999971	-0.796399	0.0106838	0.488297	-1.20552	dirigent, putative, expressed
LOC_Os09g06570	1.62889	0.658211	0.412004	2.49281	1.49591	1.88912	0	1.68823	0	1.83831	1.63154	1.5373	0.41061	0.999904	-0.734545	0.875828	0.999971	0.139496	0.0107056	0.488297	-2.27836	expressed protein
LOC_Os02g10880	21.8615	24.0529	16.0542	26.7001	21.9022	22.2614	24.2716	27.9212	22.2566	23.1533	18.4205	17.2931	0.638671	0.999904	0.0445489	0.0437635	0.999971	0.191299	0.0107108	0.488297	0.242118	UDP-glucoronosyl and UDP-glucosyl transferase domain containing protein, expressed
LOC_Os09g26460	3.718	4.70791	4.20985	4.27922	4.09032	5.09599	5.065	5.6926	4.83566	3.0148	4.01844	3.49216	0.24083	0.999904	0.183863	0.111036	0.999971	0.2498	0.0107118	0.488297	0.400038	protein binding protein, putative, expressed
LOC_Os02g58790	40.6057	20.3221	19.4168	20.7718	19.602	16.7493	16.2908	11.9842	12.6351	29.6176	17.6019	13.9767	0.0610652	0.999904	0.26202	0.886156	0.999971	-0.0200283	0.0107437	0.488839	-0.356854	cell division inhibitor, putative, expressed
LOC_Os04g59040	97.9759	105.537	110.655	93.7349	104.47	132.163	118.624	138.023	122.524	98.4765	113.253	104.275	0.935903	0.999904	-0.0058549	0.604664	0.999971	0.0376911	0.0108256	0.491476	0.185525	soluble inorganic pyrophosphatase, putative, expressed
LOC_Os04g56230	65.7215	56.1662	144.815	59.677	39.3907	103.513	35.3322	35.3664	113.798	59.911	54.3439	113.145	0.314756	0.999904	0.123662	0.268393	0.999971	-0.136145	0.0108496	0.491476	-0.313372	polyprenyl synthetase, putative, expressed
LOC_Os01g08860	90.5072	99.5096	175.72	38.2026	89.2635	220.077	88.2823	138.946	320.537	56.5365	77.0462	208.998	0.34071	0.999904	0.18379	0.746893	0.999971	-0.062257	0.0108621	0.491476	0.49134	hsp20/alpha crystallin family protein, putative, expressed
LOC_Os06g27440	0.163627	0.579274	0.359754	0.414605	0.503821	0.348672	0.0796817	0.118457	0	0.257975	0.292004	0.54501	0.936884	0.999904	-0.0530934	0.787494	0.999971	0.180738	0.0109114	0.492793	-1.70672	conserved hypothetical protein
LOC_Os04g10460	15.3456	12.8838	8.154	11.9859	12.275	10.0328	14.7429	14.1953	13.9219	12.3859	12.4966	7.71185	0.399747	0.999904	0.0996436	0.538749	0.999971	0.072739	0.0109807	0.494946	0.300953	amidase, putative, expressed
LOC_Os12g44100	0.905966	0.490916	0.613508	1.59223	0.578591	0.494163	0.550524	0.618527	0.250159	1.89632	0.538984	0.820599	0.206383	0.999904	-0.371031	0.497511	0.999971	-0.199206	0.0109997	0.494946	-0.746632	peptide transporter PTR2, putative, expressed
LOC_Os09g34230	15.7229	13.9977	44.2447	14.1889	18.5954	92.6098	14.9105	25.7863	82.1014	14.0663	10.5682	47.5513	0.590952	0.999904	0.106208	0.0356048	0.999971	0.415266	0.0110222	0.495044	0.502331	UDP-glucoronosyl/UDP-glucosyl transferase, putative, expressed
LOC_Os07g47990	67.5615	15.7269	10.1797	61.9959	19.4709	5.77401	33.9534	14.1506	4.21779	54.0483	17.3324	15.4304	0.7048	0.999904	-0.0969119	0.346963	0.999971	-0.240585	0.0110444	0.495132	-0.650077	peroxidase precursor, putative, expressed
LOC_Os07g09420	47.8677	29.6705	29.753	37.9635	35.8062	38.9727	45.2185	53.6509	55.855	35.1646	32.6837	40.8327	0.801363	0.999904	-0.035372	0.762776	0.999971	0.0424377	0.0110722	0.495465	0.357176	ATPase, putative, expressed
LOC_Os03g53230	59.7986	66.8967	65.5425	46.9547	58.5691	47.7709	46.1124	48.5496	49.8468	63.2118	68.2657	48.769	0.37334	0.999904	0.0728303	0.0581755	0.999971	-0.154979	0.0111671	0.498798	-0.207588	bifunctional 3-phosphoadenosine 5-phosphosulfate synthetase, putative, expressed
LOC_Os10g35770	73.1111	128.94	237.214	71.1562	128.504	279.786	77.9127	196.49	244.931	69.7807	113.946	208.629	0.361871	0.999904	0.099104	0.177855	0.999971	0.146447	0.0112106	0.499225	0.275644	E2F-related protein, putative, expressed
LOC_Os09g17610	8.04557	2.91556	2.0783	7.11354	5.08358	2.6629	1.91949	3.15306	1.01958	5.55935	3.55158	2.24088	0.899937	0.999904	0.0321242	0.308454	0.999971	0.260198	0.0112193	0.499225	-0.647842	RING finger protein, putative, expressed
LOC_Os03g05530	3.1449	1.02578	1.58831	1.29497	0.993867	0.553399	0.838319	0.519278	0.215653	1.95077	1.34406	0.617198	0.297853	0.999904	0.379451	0.461606	0.999971	-0.268339	0.0112742	0.499225	-0.923647	nodulin, putative, expressed
LOC_Os10g01480	20.9974	18.8979	29.0656	25.7071	23.1224	30.909	21.1596	17.9787	22.2863	25.8781	20.6159	30.2466	0.176524	0.999904	-0.112316	0.585818	0.999971	0.0452832	0.011276	0.499225	-0.210585	Inositol 1, 3, 4-trisphosphate 5/6-kinase, putative, expressed
LOC_Os07g32880	265.223	149.62	140.035	221.145	109.02	142.526	150.001	96.9508	132.202	243.755	147.245	130.086	0.617233	0.999904	0.0575961	0.384906	0.999971	-0.100135	0.0113117	0.499225	-0.291904	ATP synthase gamma chain, putative, expressed
LOC_Os12g22600	3.42529	1.14043	1.55989	1.70631	1.42552	2.59772	3.03336	2.72193	3.73988	2.10128	1.4339	1.65109	0.7798	0.999904	0.0672829	0.735268	0.999971	0.0813725	0.0113244	0.499225	0.60947	tRNA synthetases class II domain containing protein, expressed
LOC_Os10g31990	0.0678501	0.0346579	0.010847	0.0875055	0.0531676	0.0852608	0	0	0	0.00907458	0.0896432	0.0383428	0.926933	0.999904	-0.0778356	0.393443	0.999971	0.724334	0.0113751	0.499225	-2.14821	retrotransposon protein, putative, unclassified, expressed
LOC_Os06g35940	22.6254	17.163	17.216	17.2916	14.8986	11.1883	15.9334	7.12604	11.1411	20.5614	23.9595	12.5222	0.898877	0.999904	0.0262758	0.224409	0.999971	-0.251196	0.0113888	0.499225	-0.523227	osFTL12 FT-Like12 homologous to Flowering Locus T gene; contains Pfam profile PF01161: Phosphatidylethanolamine-binding protein, expressed
LOC_Os07g32480	4.34191	4.75179	4.14207	4.97674	4.46374	3.17499	4.03081	2.4037	1.59343	4.16569	4.23342	3.73832	0.649308	0.999904	0.085703	0.89645	0.999971	0.0245291	0.0114064	0.499225	-0.476834	mitotic checkpoint serine/threonine-protein kinase BUB1, putative, expressed
LOC_Os04g51300	78.5615	22.3168	16.5298	19.5863	25.636	13.146	16.0818	10.5029	9.90317	55.8714	19.587	16.2046	0.597748	0.999904	0.163246	0.290189	0.999971	-0.327243	0.0114096	0.499225	-0.782721	peroxidase precursor, putative, expressed
LOC_Os06g01850	667.568	317.829	251.39	438.651	242.88	199.851	318.615	186.655	205.832	535.208	316.191	190.293	0.182835	0.999904	0.167756	0.280706	0.999971	-0.135851	0.0114169	0.499225	-0.318576	ferredoxin--NADP reductase, chloroplast precursor, putative, expressed
LOC_Os03g42430	0.248625	0.559739	0.077859	0.588854	0.339231	0.356999	0.301786	0.0897287	0	0.553664	0.281511	0.275223	0.4876	0.999904	-0.413746	0.783671	0.999971	0.163642	0.0114223	0.499225	-1.50774	B3 DNA binding domain containing protein, expressed
LOC_Os12g23200	1630.91	1023.22	616.257	1253.27	692.777	564.259	991.003	562.95	647.79	1605.68	970.435	626.135	0.894818	0.999904	0.0171172	0.0787962	0.999971	-0.227571	0.0114939	0.501453	-0.327211	photosystem I reaction center subunit XI, chloroplast precursor, putative, expressed
LOC_Os04g36750	1.94011	3.34414	6.18006	0.804134	2.71436	6.44216	2.57573	6.22875	12.0857	2.44614	1.57891	4.54142	0.388744	0.999904	0.272625	0.831764	0.999971	-0.0671963	0.0115246	0.501898	0.799113	hsp20/alpha crystallin family protein, putative, expressed
LOC_Os12g26480	30.8643	26.4708	24.0344	30.3184	29.4176	19.9155	28.127	22.7303	15.1458	29.552	26.9999	23.9905	0.927447	0.999904	0.00805686	0.796163	0.999971	-0.0228561	0.0116696	0.504882	-0.223148	expressed protein
LOC_Os03g58890	5.77229	4.34705	5.66346	3.24143	2.83441	5.48104	5.53742	5.09605	5.42656	3.54287	3.32062	3.30656	0.0181642	0.999904	0.429321	0.629013	0.999971	0.0878026	0.0116722	0.504882	0.458336	oxidoreductase, putative, expressed
LOC_Os04g24300	3.2599	3.26623	7.6792	4.48812	2.90779	4.11309	2.91944	2.39599	3.73191	4.70731	4.18093	5.11324	0.694113	0.999904	-0.0693942	0.240682	0.999971	-0.207026	0.0116725	0.504882	-0.444988	OsWAK35a - OsWAK short gene, expressed
LOC_Os02g50600	9.46455	10.3013	18.8555	9.88859	12.6561	26.4367	9.23952	13.0816	28.3709	8.67862	7.37775	22.2359	0.472045	0.999904	0.084593	0.0162107	0.999971	0.282795	0.0117119	0.504882	0.296506	glycosyl transferase 8 domain containing protein, putative, expressed
LOC_Os06g07660	1.04068	1.09096	0.655564	0.771257	0.565306	0.250491	0.407906	0.503671	0.0581031	1.00358	0.90297	0.738979	0.943551	0.999904	0.0343895	0.234661	0.999971	-0.577194	0.0117145	0.504882	-1.2242	myb-like DNA-binding domain, SHAQKYF class family protein, expressed
LOC_Os06g45510	42.0781	39.6435	41.4504	35.1577	39.6705	46.4717	39.8385	49.0035	47.4294	33.3796	38.8334	39.5716	0.213345	0.999904	0.0990497	0.314878	0.999971	0.079996	0.0117261	0.504882	0.200602	thioredoxin, putative, expressed
LOC_Os03g05840	0.76779	0.168054	2.4563	1.42134	0.586568	0.921809	0.163093	0.350102	0.895036	2.39738	0.792729	3.0113	0.12451	0.999904	-0.89343	0.266027	0.999971	-0.646909	0.0117381	0.504882	-1.46563	FAD dependent oxidoreductase domain containing protein, expressed
LOC_Os02g49680	76.4168	34.3386	85.7297	96.0241	26.2773	80.4104	44.1572	23.8394	69.0621	88.4658	34.8349	73.2673	0.991086	0.999904	-0.00165794	0.82118	0.999971	-0.0335422	0.0117771	0.505668	-0.373781	arsenate reductase, putative, expressed
LOC_Os12g01230	2.30796	2.20215	0.567079	1.51973	1.34843	0.680051	1.10411	1.12169	0.300638	2.13343	1.88751	0.689943	0.9616	0.999904	0.0125607	0.385615	0.999971	-0.226348	0.0119048	0.50937	-0.656127	expressed protein
LOC_Os10g19980	1.11967	0.452956	0.891484	1.30081	1.18013	0.799999	0.787177	0.618645	0	2.82432	1.12914	1.03061	0.351864	0.999904	-0.637654	0.642243	0.999971	-0.318193	0.011924	0.50937	-1.72217	conserved hypothetical protein
LOC_Os01g43895	47.9012	18.8907	15.9271	30.2471	20.5712	16.7131	23.1392	15.7927	14.8287	36.2175	20.4717	19.8631	0.954208	0.999904	-0.00751533	0.384741	0.999971	-0.113756	0.0119784	0.50937	-0.328861	expressed protein
LOC_Os03g06200	71.599	54.3055	59.4139	77.2603	49.6669	78.1153	81.6663	75.0564	91.445	67.3631	61.4245	69.8815	0.39961	0.999904	-0.0752415	0.874997	0.999971	0.0140524	0.0119897	0.50937	0.224428	aminotransferase, putative, expressed
LOC_Os04g03850	0.628549	0.032371	1.621	0.245195	0.26485	0.504355	0	0.0311354	0.517213	0.678065	0.627962	0.740131	0.479433	0.999904	-0.627365	0.414356	0.999971	-0.72409	0.0119991	0.50937	-2.22852	OsSub39 - Putative Subtilisin homologue, expressed
LOC_Os03g56370	13.7566	5.01841	9.7242	6.94132	5.98035	5.18874	2.96451	3.60964	6.50755	12.6143	7.11089	7.30608	0.979077	0.999904	0.00773114	0.212181	0.999971	-0.367766	0.0120103	0.50937	-0.740444	methyltransferase, putative, expressed
LOC_Os05g08210	5.07634	4.7073	5.08288	4.00792	4.66306	4.52615	8.89204	5.6391	5.70357	4.55231	2.13804	4.16141	0.162296	0.999904	0.360267	0.345001	0.999971	0.243461	0.0120113	0.50937	0.647581	retrotransposon, putative, centromere-specific
LOC_Os06g44180	25.612	27.5049	19.3496	25.6579	21.9063	24.6754	34.7836	29.8789	33.8672	22.6567	30.1605	20.0618	0.985277	0.999904	-0.00233707	0.962749	0.999971	0.00591496	0.0120531	0.50937	0.317957	NAD dependent epimerase/dehydratase family protein, putative, expressed
LOC_Os07g35985	4.9233	4.57372	2.82101	3.13669	4.42888	2.68954	3.34631	3.25358	1.6905	4.58789	3.86074	2.82119	0.543742	0.999904	0.0794298	0.469241	0.999971	-0.0946771	0.0120927	0.50937	-0.328286	expressed protein
LOC_Os04g52450	157.857	153.628	163.571	174.195	173.622	224.146	190.497	183.957	187.334	149.089	149.696	176.148	0.97062	0.999904	0.00256549	0.00837049	0.999971	0.183665	0.0121219	0.50937	0.174737	aminotransferase, putative, expressed
LOC_Os04g48410	130.12	155.52	166.755	138.114	140.585	177.801	145.372	151.044	188.143	125.639	128.897	156.988	0.154812	0.999904	0.0939406	0.115153	0.999971	0.104024	0.0121252	0.50937	0.16563	copper chaperone for superoxide dismutase, putative, expressed
LOC_Os11g16480	34.3297	30.4684	24.3343	38.242	25.0197	25.8861	38.0037	31.271	34.3166	32.07	26.4199	25.8731	0.556953	0.999904	0.0493191	0.610928	0.999971	0.0427175	0.0121278	0.50937	0.21062	transposon protein, putative, unclassified, expressed
LOC_Os02g50440	1.44394	1.16902	1.71243	0.791347	1.56944	1.52373	0.642008	0.785525	0	2.03652	1.60328	1.52436	0.78843	0.999904	-0.173378	0.639299	0.999971	-0.302809	0.0121348	0.50937	-1.62053	retrotransposon protein, putative, unclassified, expressed
LOC_Os03g55230	4.52342	2.30249	0.242695	1.64323	2.37919	0.681309	8.30961	3.40961	1.21687	2.6105	2.11317	0.367672	0.834201	0.999904	0.0782903	0.81406	0.999971	0.0879681	0.0122008	0.510773	0.937418	cytochrome P450, putative, expressed
LOC_Os03g08070	35.9618	23.3119	31.4088	26.5812	21.1594	30.7768	23.5925	16.9555	28.9386	36.696	20.0187	31.0604	0.59398	0.999904	0.0472971	0.310374	0.999971	-0.0900056	0.0122259	0.510773	-0.222305	copper-transporting ATPase PAA1, putative, expressed
LOC_Os04g54710	0.302268	0.0407141	0.101939	0.256991	0.069398	0.200319	0.0395122	0.01958	0	0.234527	0.0921442	0.180172	0.667504	0.999904	-0.327333	0.980196	0.999971	-0.0189148	0.0122503	0.510773	-1.90867	retrotransposon protein, putative, unclassified, expressed
LOC_Os09g12420	0.0695463	0	0	0	0	0	0	0	0	0.107504	0.0981526	0.0418701	0.0900534	0.999904	-2.1206	0.012252	0.999971	-3.13352	0.012252	0.510773	-3.13352	transposon protein, putative, unclassified, expressed
LOC_Os06g02580	28.7247	18.8345	11.4827	15.6681	17.6664	11.963	12.8373	12.9061	8.76993	19.9256	17.8637	10.5992	0.186466	0.999904	0.165696	0.741253	0.999971	-0.0414136	0.0123189	0.512687	-0.313916	high-affinity nickel-transport family protein, putative, expressed
LOC_Os09g26370	1.90213	3.37829	13.4621	2.28258	1.75184	7.29636	0.554124	1.64755	10.8968	2.44185	3.1383	15.9676	0.725088	0.999904	-0.11518	0.14869	0.999971	-0.473003	0.0123728	0.512691	-0.819247	DUF581 domain containing protein, expressed
LOC_Os02g38210	194.536	156.87	148.79	148.263	140.005	128.222	99.4704	120.879	130.931	188.573	145.749	136.676	0.583185	0.999904	0.0627562	0.324003	0.999971	-0.112794	0.0123808	0.512691	-0.286037	elongation factor Tu, putative, expressed
LOC_Os12g40380	5.11848	5.37544	5.27232	4.31352	4.86559	4.9365	5.24392	5.55681	11.5063	2.91281	5.2924	4.16111	0.222357	0.999904	0.268864	0.46755	0.999971	0.160063	0.0124152	0.512691	0.550849	expressed protein
LOC_Os04g27060	1.20824	1.92389	7.46491	0.687952	1.26789	3.60139	1.12026	2.22049	6.74509	0.638009	1.72079	2.53047	0.0114393	0.999904	0.604492	0.85774	0.999971	0.0428458	0.012421	0.512691	0.597553	oxidoreductase, aldo/keto reductase family protein, putative, expressed
LOC_Os05g30220	7.56898	5.6466	2.63249	5.45733	4.41539	2.16403	5.54496	2.90892	2.06362	6.21219	4.87556	2.40363	0.159282	0.999904	0.14454	0.288248	0.999971	-0.109057	0.0124242	0.512691	-0.256718	disease resistance RPP13-like protein 1, putative, expressed
LOC_Os08g01590	20.6169	24.5682	30.1623	23.2765	24.6634	32.0682	25.9474	25.175	39.879	20.8775	23.2026	29.8521	0.823202	0.999904	0.0178781	0.302611	0.999971	0.0824857	0.0124713	0.513635	0.199924	expressed protein
LOC_Os02g05620	0.27783	0.29537	0.217512	0.460617	0.142155	0.0569906	0.0337236	0.0334229	0.185071	0.43673	0.359519	0.217849	0.733475	0.999904	-0.211672	0.266902	0.999971	-0.690157	0.0124892	0.513635	-1.55286	ATEXO70G1, putative, expressed
LOC_Os10g10080	98.35	77.2056	107.371	110.949	86.5792	145.442	109.002	100.516	145.658	92.8621	84.0526	126.106	0.338504	0.999904	-0.0632192	0.0721318	0.999971	0.118779	0.0125423	0.514592	0.164897	exostosin family domain containing protein, expressed
LOC_Os10g37340	28.4559	19.2826	26.6451	42.8982	21.4629	23.5055	38.7882	37.229	33.9519	37.101	18.1663	24.3332	0.79319	0.999904	-0.0387257	0.522519	0.999971	0.0944573	0.0125546	0.514592	0.368713	cystathionine gamma-synthase, putative, expressed
LOC_Os01g59670	10.9884	9.81173	5.5263	9.90461	10.8537	5.76942	11.6067	10.8729	6.31388	8.87485	8.17494	5.95444	0.200113	0.999904	0.106691	0.14113	0.999971	0.122544	0.0125883	0.515107	0.207783	expressed protein
LOC_Os11g05820	1.52275	1.37401	0.868571	1.87197	1.71595	1.81837	2.32364	1.68794	2.01059	1.61002	0.941258	1.37461	0.798268	0.999904	-0.0456558	0.0541292	0.999971	0.344006	0.0126325	0.516047	0.445497	transposon protein, putative, Mutator sub-class, expressed
LOC_Os02g24598	48.9427	26.7815	42.3346	27.9559	31.396	27.1404	28.7064	26.0667	16.7117	36.5894	40.2701	34.7292	0.886729	0.999904	0.0265785	0.17597	0.999971	-0.252506	0.0126684	0.516377	-0.465159	chloroplast envelope membrane protein, putative, expressed
LOC_Os02g39570	46.1428	21.2957	24.563	40.119	21.5278	16.7721	30.9529	20.7017	14.3637	43.2655	22.2074	19.6789	0.392915	0.999904	0.0809166	0.359933	0.999971	-0.0867083	0.0126991	0.516377	-0.236032	ACT domain containing protein, expressed
LOC_Os01g61690	0.196595	0.0191248	0.0718263	0.120717	0.0130394	0.0313655	0.0371205	0	0	0.32048	0.0741998	0.126949	0.447637	0.999904	-0.68488	0.205	0.999971	-1.14312	0.0127207	0.516377	-2.24712	OsSCP5 - Putative Serine Carboxypeptidase homologue, expressed
LOC_Os09g09510	0.193491	0.614095	1.08689	0.160396	0.721888	0.520937	0.164405	0.224041	0.197364	0.243958	0.985883	0.65596	0.873279	0.999904	-0.0634481	0.438041	0.999971	-0.308501	0.0127252	0.516377	-0.991082	legume lectins beta domain containing protein, expressed
LOC_Os02g01210	3.41817	2.84502	1.05665	2.92198	1.3153	0.889833	2.80783	1.13651	0.256817	2.92917	2.1829	1.24509	0.776041	0.999904	0.0845825	0.351345	0.999971	-0.277099	0.0128103	0.517878	-0.740033	amino acid transporter, putative, expressed
LOC_Os02g40890	215.479	246.726	221.535	240.248	202.089	263.48	299.137	282.043	261.451	205.513	253.414	210.187	0.801619	0.999904	0.023957	0.571318	0.999971	0.053979	0.0128129	0.517878	0.237321	GLTP domain containing protein, putative, expressed
LOC_Os05g06990	2.46901	1.16516	3.45469	1.72252	1.94422	4.16126	2.35079	2.84594	4.28668	1.79835	1.05083	3.29044	0.450182	0.999904	0.15521	0.189297	0.999971	0.269812	0.0128633	0.517878	0.511302	TKL_IRAK_CrRLK1L-1.10 - The CrRLK1L-1 subfamily has homology to the CrRLK1L homolog, expressed
LOC_Os01g60260	16.8627	17.5089	10.3017	15.1783	16.7497	11.9453	18.3947	20.4224	11.8762	13.7768	15.7151	9.79047	0.23646	0.999904	0.119811	0.22892	0.999971	0.121761	0.0128982	0.517878	0.251646	KH domain containing protein, putative, expressed
LOC_Os03g45770	48.6342	30.2257	25.393	37.2021	28.0532	22.0374	29.0283	24.8585	21.1608	40.6441	25.9865	25.118	0.11791	0.999904	0.113367	0.529948	0.999971	-0.0455386	0.0129134	0.517878	-0.180255	expressed protein
LOC_Os03g18360	0.97694	1.07654	1.12616	1.04255	0.79432	1.05209	0.772835	0.624103	0.274894	1.12749	1.19199	0.674354	0.728288	0.999904	0.0878682	0.964667	0.999971	-0.0112043	0.0129256	0.517878	-0.62873	BTBT1 - Bric-a-Brac, Tramtrack, Broad Complex BTB domain with tetratricopeptide repeats, expressed
LOC_Os10g02690	0.833123	0.312607	0.195675	0.263094	0.177615	0.213621	0	0.350787	0	0.873076	0.269521	0.26899	0.931788	0.999904	-0.0652744	0.455697	0.999971	-0.568859	0.0129522	0.517878	-1.89511	expressed protein
LOC_Os01g32770	15.7001	6.19611	3.35126	6.68294	3.99898	2.56514	21.5424	7.37717	2.44294	6.64689	2.83962	2.83957	0.0245326	0.999904	0.599698	0.753472	0.999971	0.0837574	0.0129819	0.517878	0.662525	DUF260 domain containing protein, putative, expressed
LOC_Os03g35326	0.0662305	0.133188	6.79756e-05	0	0.0716273	0.209018	0.035689	0	0	0.376536	0.218554	0.160386	0.134145	0.999904	-1.71318	0.176591	0.999971	-1.54548	0.0129911	0.517878	-2.84091	retrotransposon protein, putative, unclassified, expressed
LOC_Os08g35190	287.355	218.641	205.561	268.981	200.852	315.538	373.184	294.165	294.981	315.205	200.649	218.549	0.842093	0.999904	-0.0230658	0.534351	0.999971	0.0719444	0.0129979	0.517878	0.287583	auxin-repressed protein, putative, expressed
LOC_Os01g40950	200.162	99.1585	223.049	116.629	149.008	187.851	176.167	105.659	103.856	177.33	242.966	349.741	0.135849	0.999904	-0.407585	0.0638468	0.999971	-0.506465	0.0130133	0.517878	-0.678677	expressed protein
LOC_Os07g39520	13.5681	18.7433	34.5298	12.0684	23.4004	40.4297	17.1558	27.494	40.5226	16.0195	11.2688	26.6542	0.283938	0.999904	0.199925	0.120264	0.999971	0.289885	0.0130346	0.517878	0.463248	STE_PAK_Ste20_Slob_Wnk.5 - STE kinases include homologs to sterile 7, sterile 11 and sterile 20 from yeast, expressed
LOC_Os10g21020	24.0022	17.3309	15.0438	13.1883	16.0159	12.8252	9.14219	13.0102	10.2111	19.0366	15.5409	12.2034	0.206043	0.999904	0.18258	0.517187	0.999971	-0.0935173	0.0130426	0.517878	-0.358454	expressed protein
LOC_Os04g57560	71.6744	79.7797	108.749	100.972	92.1526	75.0248	61.9476	75.9508	80.3801	105.207	108.681	94.4286	0.185818	0.999904	-0.184328	0.303708	0.999971	-0.143293	0.0130595	0.517878	-0.345813	amine oxidase, flavin-containing, domain containing protein, expressed
LOC_Os03g55260	2.5548	1.31092	1.34834	4.41086	1.51744	1.10948	2.2452	0.66819	1.11996	3.54144	1.33095	1.80698	0.326527	0.999904	-0.210747	0.841687	0.999971	-0.0429033	0.0131728	0.520466	-0.532503	cytochrome P450, putative, expressed
LOC_Os08g38690	0.409007	0.716188	0.512336	0.807596	0.558061	0.692342	0.347523	0.147611	0	0.562565	0.578885	0.415033	0.96167	0.999904	0.0339688	0.697465	0.999971	0.274776	0.0131736	0.520466	-1.75226	retrotransposon protein, putative, SINE subclass, expressed
LOC_Os02g35039	60.4326	60.0567	69.4344	59.9154	57.0793	90.0221	68.6169	77.309	96.4105	62.6442	65.7665	72.9092	0.419968	0.999904	-0.0589497	0.888324	0.999971	0.0102645	0.0131888	0.520466	0.181177	NAD dependent epimerase/dehydratase family protein, putative, expressed
LOC_Os09g14700	0.415101	0	0.101406	0.460155	0.082845	0.0996377	0.471676	0.233735	0.431415	0	0.13096	0	0.301546	0.999904	0.943318	0.0979909	0.999971	1.51084	0.0132388	0.520569	2.26194	2-aminoethanethiol dioxygenase, putative, expressed
LOC_Os08g14450	129.901	78.1132	52.2948	111.865	75.1443	42.2625	100.954	51.6911	46.2338	121.339	73.0983	49.3639	0.418451	0.999904	0.0636316	0.389961	0.999971	-0.0676091	0.0132492	0.520569	-0.1948	RNA polymerase sigma factor, putative, expressed
LOC_Os09g23820	1.21653	0.364375	1.96499	2.65381	0.267544	1.58592	0.380821	0.51222	0.447835	1.96682	0.978711	1.75717	0.357253	0.999904	-0.443456	0.464372	0.999971	-0.352442	0.0132554	0.520569	-1.19308	cytochrome P450 72A1, putative, expressed
LOC_Os05g50180	1.21913	0.733817	1.92083	0.25265	1.41	0.218817	1.03586	2.05325	2.57587	0.279473	0.992151	0.344416	0.0807479	0.999904	0.912042	0.925835	0.999971	-0.0486147	0.0132805	0.520714	1.29318	OsCML14 - Calmodulin-related calcium sensor protein, expressed
LOC_Os03g56950	54.2913	40.202	37.1568	48.4184	35.4956	35.4114	30.1161	21.9098	39.0558	66.6234	32.5451	40.3033	0.87648	0.999904	-0.0253314	0.467075	0.999971	-0.118521	0.013387	0.521365	-0.403081	phytochrome-interacting factor 4, putative, expressed
LOC_Os03g21300	0.172386	0.352164	0.125963	0.190534	0.173834	0.206273	0	0.193555	0	0.296311	0.411427	0.397787	0.49529	0.999904	-0.553336	0.464844	0.999971	-0.593075	0.0133918	0.521365	-2.00683	expressed protein
LOC_Os06g49810	6.05182	4.52264	5.56708	5.49446	4.5544	5.26041	6.61125	6.58871	6.80283	4.69707	4.91898	5.24774	0.534774	0.999904	0.0755986	0.80924	0.999971	0.0294006	0.0133948	0.521365	0.301195	glycosyl transferase family 8, putative, expressed
LOC_Os11g45740	224.076	243.62	236.722	196.69	289.23	276.868	232.446	326.363	316.724	204.919	227.308	285.297	0.904575	0.999904	-0.00975524	0.470721	0.999971	0.0586943	0.0133991	0.521365	0.201232	MYB family transcription factor, putative, expressed
LOC_Os01g13770	582.827	247.028	185.014	343.568	238.73	184.58	294.943	184.008	155.938	443.454	250.672	177.003	0.370336	0.999904	0.100537	0.447132	0.999971	-0.0853148	0.0134477	0.521365	-0.277387	DUF250 domain containing protein, putative, expressed
LOC_Os02g50860	28.1148	34.1353	53.0658	30.7089	38.1561	60.7328	33.8654	51.4904	56.6801	26.6521	40.8687	51.5543	0.671482	0.999904	-0.0329889	0.297926	0.999971	0.0809636	0.013483	0.521365	0.192183	ras-related protein, putative, expressed
LOC_Os03g07920	0.577432	0.3866	0.297834	0.190587	0.446071	0.146317	1.03898	0.629272	0.752322	0.622921	0.173068	0.109668	0.266138	0.999904	0.53418	0.984525	0.999971	0.00931726	0.0134873	0.521365	1.18684	expressed protein
LOC_Os07g35750	0.190378	1.02091	0.221706	0.0789073	0.532705	0.239192	0.404399	0.941864	0.24967	0.130927	0.303131	0.176718	0.0866078	0.999904	0.59469	0.717708	0.999971	0.125466	0.0135071	0.521365	0.857246	TKL_IRAK_DUF26-ld.3 - DUF26 kinases have homology to DUF26 containing loci, expressed
LOC_Os07g05480	1013.43	299.768	251.299	448.899	200.398	245.224	290.231	154.534	286.182	928.32	266.571	326.904	0.936265	0.999904	-0.0197417	0.0808133	0.999971	-0.431046	0.013515	0.521365	-0.609764	photosystem I reaction center subunit, chloroplast precursor, putative, expressed
LOC_Os11g07040	48.9992	48.5395	32.6895	48.1784	48.473	35.9057	64.4348	54.3924	38.6762	47.8041	53.4874	32.5838	0.727009	0.999904	-0.0234754	0.950266	0.999971	0.00419421	0.0135406	0.521365	0.166041	CAMK_CAMK_like.43 - CAMK includes calcium/calmodulin depedent protein kinases, expressed
LOC_Os05g23880	16.2168	8.90114	11.9909	18.834	8.20601	7.82755	12.9523	6.31335	8.95778	18.256	8.9055	10.2143	0.902322	0.999904	0.013363	0.34196	0.999971	-0.10347	0.0135418	0.521365	-0.268851	lipoxygenase, putative, expressed
LOC_Os03g46940	4.80708	2.52522	4.21506	5.96565	4.46906	1.65122	0	0.934812	1.12075	14.1053	3.99548	5.0905	0.508076	0.999904	-0.532783	0.484077	0.999971	-0.563312	0.0135536	0.521365	-1.98747	expressed protein
LOC_Os12g25640	16.8591	14.7605	15.5868	13.0864	15.5566	16.7237	15.7463	15.4433	24.0038	11.1518	13.8797	14.9586	0.175294	0.999904	0.171193	0.302232	0.999971	0.130304	0.0136577	0.52454	0.311487	SAP domain containing protein, expressed
LOC_Os12g02820	34.953	26.8395	29.2016	32.597	26.8535	28.2422	24.7957	25.4935	22.6314	35.1883	24.475	29.6115	0.759806	0.999904	0.023415	0.913563	0.999971	-0.00831307	0.0136942	0.525115	-0.188798	cytidylyltransferase domain containing protein, expressed
LOC_Os04g38600	438.618	93.0685	177.582	191.276	75.247	159.767	61.1246	43.634	159.95	401.656	78.9875	191.051	0.868412	0.999904	0.0592157	0.369124	0.999971	-0.321004	0.013741	0.526075	-0.880667	glyceraldehyde-3-phosphate dehydrogenase, putative, expressed
LOC_Os02g12030	1.36733	1.68841	1.7875	1.19312	2.2929	1.39353	1.27822	1.57006	1.26838	1.95906	2.54397	1.7581	0.129109	0.999904	-0.25056	0.0966667	0.999971	-0.274269	0.0137671	0.526075	-0.406688	receptor-like protein kinase precursor, putative, expressed
LOC_Os02g36570	103.413	40.5323	68.4245	74.025	36.2428	59.5205	44.5393	33.2138	60.9286	109.433	40.2985	67.3696	0.939286	0.999904	-0.0121827	0.200228	0.999971	-0.204876	0.0138347	0.526075	-0.393713	ABC1 family domain containing protein, putative, expressed
LOC_Os07g44700	0.955502	0.557708	0.174547	0.35203	0.499078	0.457333	0.0676556	0.737576	0	0.876158	0.586024	0.822673	0.553251	0.999904	-0.479728	0.509134	0.999971	-0.534175	0.0138454	0.526075	-1.99147	expressed protein
LOC_Os09g21180	14.6287	15.3479	22.5947	15.7299	19.3243	23.8995	17.2302	15.8679	26.3451	13.1619	12.7253	22.3832	0.264977	0.999904	0.100284	0.0134424	0.999971	0.222376	0.0138933	0.526075	0.221313	homeobox associated leucine zipper, putative, expressed
LOC_Os03g04870	1.67065	1.78773	1.22075	1.28231	1.46821	1.06617	0.867481	1.71949	0.162294	1.65958	2.62727	1.04884	0.842623	0.999904	-0.075664	0.479799	0.999971	-0.269297	0.0139135	0.526075	-0.937318	expressed protein
LOC_Os01g56630	27.1772	25.8066	25.2292	23.7786	26.3681	25.8325	26.5588	30.8261	29.3282	23.7899	25.4977	24.0683	0.356199	0.999904	0.0636404	0.595145	0.999971	0.0366541	0.0139223	0.526075	0.169633	dymeclin, putative, expressed
LOC_Os06g48930	8.53295	8.40462	5.84536	8.36642	7.70207	4.12531	8.01035	6.80894	2.92798	8.10833	9.09674	6.22103	0.82886	0.999904	-0.0304912	0.203384	0.999971	-0.179419	0.0139246	0.526075	-0.346886	expressed protein
LOC_Os06g40190	17.5368	18.0908	15.3603	18.8099	18.7611	17.2325	21.1977	19.6218	21.1187	16.3043	18.4665	17.0158	0.818675	0.999904	-0.0171052	0.427729	0.999971	0.059175	0.0139286	0.526075	0.183483	phospholipase D, putative, expressed
LOC_Os11g09180	1.4795	2.23207	7.4142	1.17891	4.21265	8.53119	0.877045	1.36179	3.16864	1.65198	1.94367	5.70297	0.647395	0.999904	0.0962142	0.181307	0.999971	0.281194	0.0139349	0.526075	-0.517257	expressed protein
LOC_Os04g48490	1.18544	0.851594	1.13273	0.369555	0.961658	1.6367	1.39464	1.27982	3.82682	0.808286	0.774373	0.961766	0.520647	0.999904	0.210466	0.985482	0.999971	-0.00596229	0.0139736	0.52641	0.805348	fasciclin-like arabinogalactan protein, putative, expressed
LOC_Os04g56400	938.455	397.382	468.645	582.338	262.27	395.997	391.711	221.094	403.042	852.139	312.684	395.755	0.25765	0.999904	0.167974	0.216876	0.999971	-0.183246	0.013987	0.52641	-0.364687	glutamine synthetase, catalytic domain containing protein, expressed
LOC_Os05g44630	1.32781	1.79361	1.28903	2.09656	1.40407	0.762639	1.16044	0.543102	0.884497	1.94808	1.84709	1.24938	0.648771	0.999904	-0.12628	0.415252	0.999971	-0.225874	0.0140261	0.526531	-0.681097	IQ calmodulin-binding motif family protein, putative, expressed
LOC_Os04g54230	1.90932	0.626868	1.70033	0.659475	0.569872	1.88484	2.23067	1.90931	5.84259	0.656539	0.743144	1.54115	0.489843	0.999904	0.317632	0.976765	0.999971	-0.0133961	0.0140401	0.526531	1.12978	wound induced protein, putative, expressed
LOC_Os01g25920	84.4682	67.6842	76.4425	87.7845	74.7863	67.4955	74.7318	63.1047	59.031	89.1176	64.5051	80.7209	0.763339	0.999904	-0.0204076	0.844206	0.999971	-0.0133193	0.0140549	0.526531	-0.166451	expressed protein
LOC_Os01g64020	1.63771	1.1671	1.07324	1.48502	1.10096	0.884608	2.27242	1.99247	1.10097	0.989916	1.29674	0.800997	0.287828	0.999904	0.228057	0.592357	0.999971	0.114881	0.0140884	0.526975	0.526749	transcription factor, putative, expressed
LOC_Os08g25734	79.0483	38.6553	41.3585	46.3548	34.8886	35.632	35.7132	25.0134	30.1414	56.8798	36.1229	30.5751	0.0404878	0.999904	0.232499	0.813844	0.999971	-0.0267221	0.0141263	0.526982	-0.278494	glucose-1-phosphate adenylyltransferase large subunit, chloroplast precursor, putative, expressed
LOC_Os08g08360	79.9264	78.2181	93.2309	63.9558	76.6507	91.5943	82.5177	82.6396	104.204	63.6475	79.0718	82.1395	0.129114	0.999904	0.114046	0.693623	0.999971	0.0296044	0.0141643	0.526982	0.184346	expressed protein
LOC_Os11g01420	39.4849	35.1217	37.4646	43.7611	31.4559	40.1385	40.3989	40.721	48.4918	30.8541	37.1251	34.867	0.361384	0.999904	0.0871898	0.248754	0.999971	0.110178	0.0141738	0.526982	0.23431	ribosomal protein L10, putative, expressed
LOC_Os01g39000	22.3883	26.8942	17.1815	27.2778	21.0534	14.4626	25.0146	16.4192	9.39086	33.0812	21.6602	15.5106	0.864056	0.999904	-0.0243325	0.504037	0.999971	-0.0949562	0.0141949	0.526982	-0.348515	ZmGR2c, putative, expressed
LOC_Os03g27960	5.95527	7.87374	7.29577	4.82648	9.19374	8.15985	7.91421	8.90495	8.19798	4.9998	7.63872	6.46759	0.355767	0.999904	0.107935	0.268393	0.999971	0.129361	0.0141966	0.526982	0.286622	sodium/calcium exchanger protein, putative, expressed
LOC_Os03g50310	91.0993	47.817	71.7628	83.4378	39.2389	59.5521	49.478	35.5668	70.4563	96.6586	45.8076	74.2767	0.894746	0.999904	-0.0173439	0.189026	0.999971	-0.172188	0.0142563	0.528114	-0.321278	CCT/B-box zinc finger protein, putative, expressed
LOC_Os05g48780	2.13829	1.51552	1.00443	1.12542	0.972513	0.950347	0.173033	0.857453	0	0.933678	0.864688	0.723263	0.349908	0.999904	0.550662	0.753262	0.999971	0.185175	0.0142788	0.528114	-1.44337	expressed protein
LOC_Os03g64050	0.865285	0.49407	0.371113	0.790049	0.291946	0.0810298	0.127863	0.285126	0	0.689941	0.234285	0.315814	0.544274	0.999904	0.361524	0.622967	0.999971	-0.29313	0.0142985	0.528114	-1.46054	receptor protein kinase, putative, expressed
LOC_Os02g11859	58.4809	68.7529	76.495	38.9713	68.02	94.7751	53.8476	77.7065	125.354	44.7966	53.0363	87.2991	0.305946	0.999904	0.130791	0.605856	0.999971	0.0659213	0.0143137	0.528114	0.31291	expressed protein
LOC_Os05g13520	19.8103	27.7333	24.8125	31.0193	28.323	23.5757	23.0533	21.7848	21.5042	28.5521	28.7483	27.2475	0.090036	0.999904	-0.165411	0.809438	0.999971	-0.0235304	0.0144057	0.529663	-0.238766	white-brown complex homolog protein 12, putative, expressed
LOC_Os04g25740	31.5574	14.7857	7.82022	23.3487	12.9681	7.82001	19.6644	9.7277	6.96607	25.7665	12.91	7.74331	0.189782	0.999904	0.115605	0.768041	0.999971	-0.0260035	0.01442	0.529663	-0.215709	expressed protein
LOC_Os09g30490	25.7056	21.359	20.5478	22.9828	16.8596	70.5297	24.6238	31.2292	56.5915	16.2145	8.48147	30.4493	0.303785	0.999904	0.328981	0.050309	0.999971	0.626171	0.0144209	0.529663	0.782697	EF hand family protein, expressed
LOC_Os02g06605	5.58033	1.49285	1.10434	3.7692	2.17447	1.16853	1.7122	1.82747	1.08419	7.53328	2.63269	1.70162	0.165157	0.999904	-0.426278	0.17937	0.999971	-0.412385	0.0144475	0.529842	-0.751226	expressed protein
LOC_Os01g09620	4.33118	2.82091	1.97195	6.0423	2.19019	1.6875	3.05726	2.54446	1.28593	5.73922	3.20914	1.91002	0.455492	0.999904	-0.126292	0.379668	0.999971	-0.148666	0.0145358	0.53212	-0.413544	zinc finger/CCCH transcription factor, putative, expressed
LOC_Os08g17870	3.82201	2.94539	3.16367	3.82833	2.2815	4.6305	5.88603	4.84453	7.65777	3.19433	4.57549	3.43209	0.571135	0.999904	-0.114325	0.730764	0.999971	-0.0694591	0.0145532	0.53212	0.493185	reticulon domain containing protein, putative, expressed
LOC_Os01g02130	1.26979	1.53524	3.51253	2.60643	0.757983	2.77833	2.77433	2.24041	3.66533	1.38612	0.821569	2.30367	0.28257	0.999904	0.313668	0.400647	0.999971	0.245334	0.0146003	0.533041	0.712868	expressed protein
LOC_Os01g01920	28.839	30.8649	37.3311	30.4107	27.6112	35.4443	23.0404	21.626	31.9247	28.818	28.6299	33.0015	0.358513	0.999904	0.0659373	0.658894	0.999971	0.0317005	0.0146612	0.534466	-0.175266	HD domain containing protein 2, putative, expressed
LOC_Os02g54730	30.8607	26.282	23.6476	23.8968	24.9022	20.8329	23.0503	19.2992	19.3672	27.8181	23.0891	23.7931	0.326553	0.999904	0.0752679	0.377855	0.999971	-0.0676554	0.0147244	0.535967	-0.187125	transmembrane amino acid transporter protein, putative, expressed
LOC_Os10g40740	43.3177	31.6496	78.809	42.7368	42.2856	52.4788	27.1087	27.915	40.7302	50.5904	34.3187	52.2988	0.693872	0.999904	0.0575272	0.909898	0.999971	0.01654	0.0148019	0.537723	-0.356207	helix-loop-helix DNA-binding domain containing protein, expressed
LOC_Os07g09020	0.311648	0.213538	0.148514	0.119811	0.0404422	0	0.345391	0.148335	0	0.0372742	0	0	5.67286e-05	0.0864685	2.94245	0.156135	0.999971	1.03649	0.0148167	0.537723	1.78097	argonaute, putative, expressed
LOC_Os02g05744	20.2098	25.9402	30.7713	23.0142	25.502	46.4851	29.3552	33.8417	52.3618	24.9217	30.3911	35.7882	0.0561551	0.999904	-0.173361	0.962888	0.999971	0.00422365	0.0148855	0.538764	0.221047	endoglucanase, putative, expressed
LOC_Os02g10070	79.5547	78.8284	98.1218	73.5127	73.7998	113.281	79.2545	95.0081	112.466	76.69	73.0554	94.3505	0.447409	0.999904	0.0501999	0.428891	0.999971	0.0522714	0.0148896	0.538764	0.160896	citrate synthase, putative, expressed
LOC_Os01g72970	7.11179	6.50229	8.26733	5.69838	8.6984	7.26012	7.43719	9.79992	8.32908	5.79159	6.48517	7.56829	0.351286	0.999904	0.0982354	0.444512	0.999971	0.0805821	0.0149494	0.540128	0.256481	DUF630/DUF632 domains containing protein, putative, expressed
LOC_Os08g14940	2.95087	8.13133	44.9399	5.80385	6.42	21.7642	2.06866	4.57303	25.93	5.06091	12.4136	31.7083	0.472798	0.999904	-0.204587	0.296718	0.999971	-0.297362	0.0149838	0.540167	-0.693258	receptor kinase, putative, expressed
LOC_Os03g01670	0.162289	0.114141	0.245266	0.177591	0.644042	0.252101	0.723313	0.389371	0.251445	0.00727	0.262881	0.0763093	0.237411	0.999904	0.828759	0.0433112	0.999971	1.41743	0.0149948	0.540167	1.7063	retrotransposon protein, putative, unclassified, expressed
LOC_Os02g44290	6.13608	3.95713	2.16528	3.30831	3.89513	2.2779	4.67959	5.01596	3.69863	3.48571	3.60943	2.08746	0.162619	0.999904	0.230194	0.813333	0.999971	0.0389277	0.0150578	0.540816	0.400767	phosphatase, putative, expressed
LOC_Os01g16440	1.53775	2.91706	0.56182	7.08182	1.37691	1.84004	0	2.58988	0	3.99517	2.61174	1.48948	0.514397	0.999904	-0.55665	0.950023	0.999971	0.0535111	0.0150636	0.540816	-2.07533	expressed protein
LOC_Os03g16150	10.3938	8.59442	7.13206	9.44054	8.05432	6.87692	12.006	8.93916	12.4331	10.5865	8.32502	6.50116	0.766389	0.999904	0.0348653	0.808783	0.999971	-0.0283986	0.0150793	0.540816	0.285219	mannose-1-phosphate guanyltransferase, putative, expressed
LOC_Os01g15640	74.8048	61.9943	65.9754	82.3208	71.0285	62.887	100.932	68.2934	65.4526	75.1203	61.7076	60.6909	0.678528	0.999904	0.0275334	0.169381	0.999971	0.0912879	0.0152182	0.543185	0.161235	no apical meristem protein, putative, expressed
LOC_Os04g42250	87.869	85.2219	104.947	86.1993	74.7223	156.745	116.859	98.8105	147.947	95.4895	75.0916	111.909	0.944133	0.999904	-0.00738275	0.455646	0.999971	0.0785965	0.0152297	0.543185	0.255676	transferase family protein, putative, expressed
LOC_Os02g52420	49.1893	43.149	46.7582	47.277	38.7966	42.0175	42.0632	35.783	33.2847	48.9935	41.4101	43.4974	0.611426	0.999904	0.0386885	0.571535	0.999971	-0.0430865	0.0152321	0.543185	-0.184808	peptidase, M24 family protein, putative, expressed
LOC_Os01g27210	112.015	88.7239	87.4244	56.6521	63.162	89.9313	89.1919	127.653	103.082	61.6073	77.0544	82.0053	0.0811106	0.999904	0.267105	0.688505	0.999971	-0.0613884	0.0152461	0.543185	0.371572	glutathione S-transferase, putative, expressed
LOC_Os01g70710	115.185	76.8366	94.571	119.927	71.8626	132.046	126.201	109.651	133.789	95.7978	88.5472	98.3394	0.995022	0.999904	0.000693152	0.34202	0.999971	0.105572	0.0152681	0.543185	0.269542	heavy metal-associated domain containing protein, expressed
LOC_Os01g05090	44.766	41.0698	34.1505	34.781	38.0213	34.3949	34.2452	30.3731	27.0771	38.4859	37.6466	37.0082	0.548239	0.999904	0.0521477	0.543515	0.999971	-0.0527648	0.0152944	0.543185	-0.210651	expressed protein
LOC_Os02g31070	45.8763	36.4264	32.2125	42.3716	32.4167	31.8421	29.3389	32.9604	27.565	45.8613	36.0226	29.8912	0.733499	0.999904	0.028312	0.644212	0.999971	-0.0384022	0.0153177	0.543185	-0.201631	expressed protein
LOC_Os01g55900	5.77086	4.79668	11.1691	5.69209	5.08005	9.30902	5.2137	5.321	5.53509	7.26765	6.69961	9.38692	0.37871	0.999904	-0.130309	0.239946	0.999971	-0.173956	0.0153423	0.543185	-0.358859	holliday junction resolvase, putative, expressed
LOC_Os04g41810	0.0537957	0.259046	0.619111	0.772966	0.289014	0.328291	0.0914177	0.0906027	0.470334	0.764592	0.593886	0.885817	0.0459362	0.999904	-1.20854	0.362802	0.999971	-0.551016	0.0153671	0.543185	-1.46746	expressed protein
LOC_Os03g24110	0.365658	0.330719	0.240297	0.365852	0.289542	0.133661	0.226013	0	0	0.117608	0.169748	0.152829	0.446568	0.999904	0.738166	0.602392	0.999971	0.505232	0.0153681	0.543185	-2.3504	retrotransposon protein, putative, unclassified, expressed
LOC_Os09g32526	84.5934	111.761	94.3697	86.8168	98.5447	115.531	109.473	113.855	123.754	78.4812	111.047	102.823	0.980196	0.999904	-0.00189344	0.64898	0.999971	0.0347198	0.0153995	0.543508	0.184808	peptidyl-prolyl cis-trans isomerase, FKBP-type, putative, expressed
LOC_Os08g10620	0.732787	1.38431	0.517692	1.34858	0.857414	0.768695	0.374012	0.376003	0.256504	3.01839	1.2449	1.25809	0.262226	0.999904	-0.700436	0.391797	0.999971	-0.535014	0.0154865	0.545786	-1.5124	expressed protein
LOC_Os09g32510	93.8801	72.0579	75.6046	81.3811	79.0418	91.004	114.798	93.298	99.4495	99.8607	77.0511	86.5363	0.182659	0.999904	-0.0883528	0.537597	0.999971	-0.040871	0.0155442	0.547031	0.16041	BHLH transcription factor, putative, expressed
LOC_Os12g21784	19.4459	19.6847	7.82535	10.9715	16.0474	7.49765	9.28572	9.75669	6.38812	13.438	15.3258	6.9761	0.0483829	0.999904	0.244354	0.832596	0.999971	-0.0261653	0.0156953	0.549111	-0.29906	expressed protein
LOC_Os05g02754	3.45889	11.3666	9.71152	4.7133	7.01445	19.7983	6.19994	11.4514	14.1953	4.08406	6.14286	6.45584	0.260657	0.999904	0.285079	0.0654266	0.999971	0.466921	0.015711	0.549111	0.612199	expressed protein
LOC_Os01g43250	29.5328	30.2156	25.2333	25.8688	28.5522	27.2217	32.4694	32.1082	34.7248	27.5876	29.464	24.0441	0.589454	0.999904	0.0467319	0.894419	0.999971	0.0114931	0.0157193	0.549111	0.209171	WD domain, G-beta repeat domain containing protein, expressed
LOC_Os04g20400	0.218519	0.511201	0.918133	0.395765	0.773433	0.120598	0.0467309	0.196178	0.285952	0.303322	0.84117	0.744605	0.719254	0.999904	-0.19891	0.347148	0.999971	-0.520239	0.0157274	0.549111	-1.33648	cytokinin-O-glucosyltransferase 1, putative, expressed
LOC_Os12g40910	0	1.22142	0.509695	0.256991	1.52676	0.834662	0.790245	0.3916	0	4.26412	2.10615	1.80172	0.029931	0.999904	-1.79373	0.157971	0.999971	-1.16657	0.0157374	0.549111	-1.99528	expressed protein
LOC_Os06g15640	0.430632	0.474963	0.467677	0.676147	0.535797	0.512552	0.21576	0.379074	0.125305	0.437009	0.421969	0.489995	0.950078	0.999904	0.0183415	0.413157	0.999971	0.239738	0.0157384	0.549111	-0.707459	retrotransposon protein, putative, unclassified, expressed
LOC_Os08g32610	1.01268	1.06395	1.49051	0.92741	1.53717	1.18405	0.147506	1.0477	0.674578	1.11431	1.03197	1.56942	0.918572	0.999904	-0.0389258	0.958179	0.999971	-0.0199663	0.0157856	0.549972	-0.919086	armadillo/beta-catenin repeat family protein, putative, expressed
LOC_Os02g07360	108.468	84.1798	37.5237	81.5145	69.1886	35.279	72.7463	56.655	35.21	98.7585	71.79	35.2136	0.152148	0.999904	0.105058	0.315841	0.999971	-0.0735883	0.0158416	0.550485	-0.176997	pentatricopeptide containing protein, putative, expressed
LOC_Os04g51710	11.4246	12.4552	11.5625	12.8693	9.90308	9.44363	12.0876	9.06778	8.496	14.0281	11.8455	11.3204	0.637078	0.999904	-0.0450442	0.124458	0.999971	-0.146681	0.0158455	0.550485	-0.23033	expressed protein
LOC_Os08g24300	14.749	11.0684	13.8564	13.9729	10.062	15.1272	21.4833	8.87155	24.562	5.79612	4.77141	0	0.0382203	0.999904	1.44849	0.0404449	0.999971	1.4322	0.0158718	0.550488	1.68568	expressed protein
LOC_Os12g16680	8.20135	8.078	8.70821	7.08182	11.1683	9.2002	12.6304	15.9709	14.9384	7.05029	9.14107	6.28891	0.675625	0.999904	0.115399	0.480796	0.999971	0.194433	0.0159068	0.550488	0.664925	expressed protein
LOC_Os04g55670	19.9454	20.458	23.8825	19.0682	27.0423	23.5701	23.0085	27.5438	29.1344	19.4684	21.3473	25.383	0.73396	0.999904	-0.0268474	0.533134	0.999971	0.049232	0.015979	0.550488	0.19033	glycosyltransferase family 43 protein, putative, expressed
LOC_Os01g45110	3.23502	2.50164	7.90191	2.23903	2.13356	9.45529	2.30529	3.45115	7.72479	1.93451	0.908525	6.3136	0.0144081	0.999904	0.579763	0.0486909	0.999971	0.467068	0.0159859	0.550488	0.570833	anthocyanin 3-O-beta-glucosyltransferase, putative, expressed
LOC_Os12g15350	0.231438	0.162946	0.358232	0.234855	0.247314	0.111358	0	0.181568	0	0.120375	0.156186	0.159986	0.574398	0.999904	0.485578	0.772408	0.999971	0.250081	0.0159906	0.550488	-2.08307	retrotransposon protein, putative, unclassified, expressed
LOC_Os03g53200	28.1923	31.7014	32.7613	32.2223	31.7344	29.0146	45.7627	32.8806	34.1361	31.8365	28.1808	29.9639	0.758491	0.999904	0.0280268	0.701757	0.999971	0.0349078	0.0160081	0.550488	0.219568	OsCML4 - Calmodulin-related calcium sensor protein, expressed
LOC_Os10g15240	23.5463	14.5026	20.8941	25.7225	16.303	17.3473	21.5189	14.2949	9.7347	25.3569	16.9731	20.1552	0.652535	0.999904	-0.0654423	0.697405	0.999971	-0.0565153	0.0160418	0.550488	-0.349994	retrotransposon protein, putative, Ty3-gypsy subclass, expressed
LOC_Os07g12630	6.49251	0.863065	0.819661	3.83221	0.852231	0.536901	2.71494	0.629747	0.396257	5.89104	1.30861	0.658502	0.902745	0.999904	-0.0333722	0.202419	0.999971	-0.348125	0.0160583	0.550488	-0.657526	transcription elongation factor protein, putative, expressed
LOC_Os05g50330	7.4781	2.6785	1.95481	2.95688	1.15336	1.79595	2.11462	0.938678	1.47268	4.89507	2.69255	1.94622	0.634614	0.999904	0.139767	0.111468	0.999971	-0.468093	0.0160695	0.550488	-0.707989	expressed protein
LOC_Os01g05530	37.3953	36.2647	32.6991	39.2946	34.562	26.8749	36.6327	32.2668	22.1253	37.9985	38.0288	30.5732	0.99092	0.999904	0.000808166	0.385777	0.999971	-0.0615924	0.0161113	0.550488	-0.170892	expressed protein
LOC_Os01g55620	1.26302	2.6057	5.91247	1.85034	4.82049	2.47125	1.58049	1.48967	0.216838	3.32601	3.72378	4.32412	0.591708	0.999904	-0.330514	0.638958	0.999971	-0.2891	0.0161495	0.550488	-1.48231	transposon protein, putative, unclassified, expressed
LOC_Os12g27370	36.0823	40.7716	33.7292	34.4271	34.4635	27.1003	28.666	25.9582	25.0685	33.6259	34.1699	27.0036	0.0235211	0.999904	0.156046	0.839638	0.999971	0.0139421	0.0161534	0.550488	-0.165731	expressed protein
LOC_Os08g43390	2.35074	1.86396	0.559061	3.75025	1.07229	0.302514	2.86415	1.62473	0.387783	5.00248	2.3227	0.758983	0.0493817	0.999904	-0.424789	0.00263562	0.999971	-0.650022	0.0161613	0.550488	-0.519887	cytochrome P450, putative, expressed
LOC_Os07g14590	35.8161	47.5995	54.1273	40.4038	49.0549	74.9954	56.0561	59.8882	64.6891	36.7924	45.2861	65.2105	0.573725	0.999904	-0.0548708	0.274953	0.999971	0.106482	0.0161616	0.550488	0.234596	hydrolase, putative, expressed
LOC_Os08g09510	0.0368144	0.102616	0.113843	0.0975518	0.182919	0.014334	0.204777	0.361423	0.267907	0.0276571	0.0390004	0.121984	0.585923	0.999904	0.360897	0.71886	0.999971	0.238487	0.0162163	0.551582	1.59264	retrotransposon protein, putative, unclassified, expressed
LOC_Os08g45180	36.8224	24.8561	15.5256	23.109	25.0571	15.7988	20.8446	17.6671	13.0542	29.6396	21.595	16.0579	0.300288	0.999904	0.107501	0.723235	0.999971	-0.036754	0.0162956	0.551682	-0.249313	kinase, pfkB family, putative, expressed
LOC_Os01g56370	1.38669	3.48911	2.94798	2.40714	3.22513	3.34295	1.18082	2.73785	1.81323	1.85384	3.21094	3.93946	0.383992	0.999904	-0.1652	0.851502	0.999971	0.0355239	0.0163245	0.551682	-0.455728	wax synthase, putative, expressed
LOC_Os11g40009	0.608385	0.73239	0.24044	1.76121	0.24553	0.137808	0.631034	0.207822	0	2.07196	0.357054	0.265603	0.770978	0.999904	-0.202167	0.584046	0.999971	-0.38023	0.0163631	0.551682	-1.66731	phospholipase, patatin family, putative, expressed
LOC_Os08g01514	0.665126	1.05878	0.463918	0.601483	0.288755	0.434114	1.7468	0.560103	1.69169	0.44356	0.205392	0.468543	0.189674	0.999904	0.63896	0.717028	0.999971	0.176571	0.0163653	0.551682	1.16956	expressed protein
LOC_Os01g16660	0.200988	0.279018	0.474639	0.15013	0.500023	0.295271	0.193615	0.0768925	0.132584	0.414406	0.67476	0.249171	0.506804	0.999904	-0.312418	0.435782	0.999971	-0.366783	0.0163758	0.551682	-1.12973	transposon protein, putative, unclassified, expressed
LOC_Os01g67800	0.523303	0.231954	0.103865	0.434814	0.374793	0.041274	0.156579	0.193503	0	0.854132	0.205425	0.502722	0.471795	0.999904	-0.636544	0.351743	0.999971	-0.823776	0.0163768	0.551682	-2.12347	retrotransposon protein, putative, unclassified, expressed
LOC_Os10g37330	37.0717	26.3596	23.3146	26.91	25.9188	24.6746	21.3313	18.7651	20.7794	28.6385	26.3733	21.4677	0.215048	0.999904	0.112899	0.809928	0.999971	0.0219021	0.0163776	0.551682	-0.218584	oxidoreductase, aldo/keto reductase family protein, putative, expressed
LOC_Os03g22620	0.82308	0.3855	0.269617	0.223237	0.410743	0.15705	0.382653	0.0705525	0.0606889	0.474469	0.385192	0.189963	0.46577	0.999904	0.295661	0.481662	0.999971	-0.285224	0.0164315	0.552733	-0.972534	terpene synthase family, metal binding domain containing protein, expressed
LOC_Os12g34124	0.725841	0.123716	1.01425	0.243965	0.730899	1.36053	1.80403	0.564487	0.383453	0	0	0.80148	0.0488813	0.999904	2.13611	0.0241012	0.999971	2.44617	0.0164869	0.5533	2.60065	mitochondrial ribosomal protein S3, putative, expressed
LOC_Os08g44000	24.9244	20.114	21.1421	16.484	20.5304	17.8555	13.4662	13.5172	14.6065	23.1528	17.5692	15.2112	0.122403	0.999904	0.178921	0.959752	0.999971	-0.00584502	0.0165299	0.5533	-0.27763	uncharacterized protein ycf39, putative, expressed
LOC_Os08g33820	2429.69	1040.41	551.332	1456.56	647.975	563.88	1103.66	498.647	642.701	2211.62	889.743	669.239	0.91888	0.999904	0.018458	0.0979172	0.999971	-0.299953	0.0165459	0.5533	-0.43436	chlorophyll A-B binding protein, putative, expressed
LOC_Os01g18670	65.4856	61.4462	39.982	73.9464	63.1693	43.705	91.9887	74.9114	46.4469	71.8154	60.6079	45.9723	0.274515	0.999904	-0.0731385	0.896136	0.999971	0.00873762	0.016562	0.5533	0.160389	MDR-like ABC transporter, putative, expressed
LOC_Os05g07870	29.611	21.0612	57.0736	37.3996	16.4859	40.1329	19.4232	18.198	35.7579	36.7553	20.4357	49.2443	0.928606	0.999904	-0.0132367	0.371996	0.999971	-0.131887	0.016577	0.5533	-0.353961	triose phosphate/phosphate translocator, non-green plastid,chloroplast precursor, putative, expressed
LOC_Os07g13969	66.5539	26.2256	15.2846	26.3192	27.1969	13.4455	19.1634	12.5063	13.9088	46.5996	27.1902	15.4416	0.673726	0.999904	0.102895	0.337805	0.999971	-0.234243	0.0165845	0.5533	-0.585489	expressed protein
LOC_Os06g41670	0.860372	1.1502	0.655281	0.740558	0.904158	0.666447	0.704259	0.517406	0.294836	0.990596	0.859881	0.639892	0.797067	0.999904	0.0571875	0.772567	0.999971	-0.064276	0.0166123	0.553471	-0.532673	CC-NBS-LRR protein, putative, expressed
LOC_Os10g22600	0.240147	0.175212	0.48256	0.840523	0.191137	0.488503	0.748173	0	0.0466578	0.623916	0.498506	0.491062	0.382991	0.999904	-0.63761	0.779859	0.999971	-0.20428	0.0167717	0.55802	-1.748	ethylene-responsive transcription factor, putative, expressed
LOC_Os03g18060	0.0842662	0	0.179184	0.0428196	0.0378562	0.0709921	0	0	0.0675853	0.171678	0.0347646	0.0964089	0.378578	0.999904	-0.776164	0.563118	0.999971	-0.509689	0.0168181	0.558173	-2.10733	transposon protein, putative, unclassified, expressed
LOC_Os07g11110	83.657	24.619	12.4946	23.2529	20.6896	10.2426	10.3848	8.88274	10.7601	58.4687	18.3398	13.5508	0.609772	0.999904	0.190014	0.335965	0.999971	-0.358202	0.0168221	0.558173	-0.889976	NAD dependent epimerase/dehydratase family protein, putative, expressed
LOC_Os03g22730	109.413	100.932	95.3245	118.267	90.6528	93.0416	117.313	122.368	122.526	109.587	108	93.4106	0.800558	0.999904	-0.0167643	0.627306	0.999971	-0.0322194	0.0168545	0.558386	0.158592	nucleolar protein NOP5-1, putative, expressed
LOC_Os06g10770	69.8246	65.2207	55.0784	54.492	59.5373	62.3457	63.2506	70.5724	68.5428	51.4001	62.3643	56.467	0.147776	0.999904	0.108289	0.601567	0.999971	0.0390643	0.0168743	0.558386	0.178765	peptidase, putative, expressed
LOC_Os04g33830	1259.91	290.17	188.693	491.528	172.766	157.184	281.064	124.942	240.195	1030.84	255.461	280.181	0.939602	0.999904	-0.0228363	0.0595727	0.999971	-0.567801	0.0170503	0.563446	-0.719002	membrane protein, putative, expressed
LOC_Os02g13160	48.2842	41.969	29.2758	41.7109	39.9378	32.2877	35.632	37.7336	18.1082	42.424	45.6085	31.0906	0.967667	0.999904	-0.00504858	0.777381	0.999971	-0.0352148	0.0171045	0.564471	-0.296987	F-box protein PP2-A15, putative, expressed
LOC_Os04g17050	76.6098	85.1888	67.3061	68.4237	74.0278	64.7937	85.1897	87.3995	83.1406	69.9737	74.0501	74.7097	0.53535	0.999904	0.0416846	0.430874	0.999971	-0.0529713	0.0171565	0.564892	0.160275	glutaredoxin family protein, expressed
LOC_Os11g11150	1.77727	0.547901	0.329237	1.43869	0.403448	0.305518	0.850763	0.168636	0.0583611	2.18057	0.297602	0.307118	0.715586	0.999904	0.152098	0.92527	0.999971	-0.0391543	0.0171636	0.564892	-0.99482	retrotransposon protein, putative, Ty3-gypsy subclass, expressed
LOC_Os07g16364	7.43559	7.91547	13.7191	8.47232	8.2638	19.2717	5.00538	6.41354	15.0322	7.98687	9.15033	17.0097	0.26964	0.999904	-0.14401	0.822	0.999971	0.0293492	0.0172018	0.565387	-0.310795	expressed protein
LOC_Os02g21090	0.403605	0.763108	0.776721	0.654891	0.460505	0.311393	0.210587	0.260887	0.312996	0.54922	0.420941	0.855408	0.851817	0.999904	0.0622355	0.467521	0.999971	-0.24205	0.0172932	0.566804	-0.793069	CPuORF33 - conserved peptide uORF-containing transcript, expressed
LOC_Os02g18150	2.99168	1.94655	1.32333	1.73511	2.528	1.28956	1.62032	1.40766	0.702316	3.00125	2.83755	0.871097	0.956379	0.999904	0.0115915	0.675915	0.999971	-0.0885914	0.0173004	0.566804	-0.504423	expressed protein
LOC_Os01g25065	0.399686	0.305982	0.151351	0.348798	0.242836	0.451016	0.138678	0.201306	0	0.496993	0.219121	0.550058	0.587228	0.999904	-0.373174	0.834088	0.999971	-0.143989	0.0173146	0.566804	-1.63605	ATP synthase subunit beta, putative, expressed
LOC_Os09g32290	2.28763	5.47219	11.7246	4.58275	10.6861	5.93357	3.10623	2.73096	2.68072	5.99442	5.61914	9.90477	0.465147	0.999904	-0.272503	0.906571	0.999971	-0.0437875	0.017356	0.567397	-0.887605	FAD dependent oxidoreductase domain containing protein, expressed
LOC_Os03g62780	57.5941	29.7236	28.3925	31.6048	21.015	25.7204	20.2927	15.8912	26.2233	52.8828	25.6171	25.0516	0.536752	0.999904	0.119251	0.240316	0.999971	-0.226674	0.0173884	0.567695	-0.459139	S1 RNA binding domain containing protein, expressed
LOC_Os01g08440	19.0132	28.1184	70.7689	26.0066	16.7749	66.8714	18.8081	25.5426	65.2254	13.651	15.4359	49.8844	0.00588837	0.999904	0.426256	0.0270776	0.999971	0.342127	0.0175178	0.571155	0.367706	UDP-glucoronosyl and UDP-glucosyl transferase domain containing protein, expressed
LOC_Os01g53040	5.42569	6.10087	4.92655	7.55487	7.82708	5.76665	7.50267	8.0181	7.03798	7.24322	5.55613	4.2936	0.876776	0.999904	-0.0197217	0.0728131	0.999971	0.228179	0.0175935	0.571826	0.301957	WRKY14, expressed
LOC_Os08g23320	6.26195	6.76801	6.15343	7.78035	6.32881	5.84448	5.83435	6.16418	5.10982	7.72195	7.28584	7.4876	0.162876	0.999904	-0.160055	0.276631	0.999971	-0.124781	0.0175983	0.571826	-0.272287	para-hydroxybenzoate--polyprenyltransferase, mitochondrial precursor, putative, expressed
LOC_Os04g59610	29.2615	10.8796	19.1011	18.9491	6.52783	14.7313	8.51513	6.52043	16.6769	27.3733	9.63924	17.5953	0.690431	0.999904	0.089451	0.168346	0.999971	-0.309393	0.0176259	0.571826	-0.533059	expressed protein
LOC_Os09g11520	31.8943	22.2396	17.8535	19.9551	26.6205	15.7018	18.6795	19.2804	8.43192	22.9789	23.5058	16.8073	0.467372	0.999904	0.11041	0.86342	0.999971	-0.0261338	0.0176322	0.571826	-0.360547	DUF565 domain containing protein, putative, expressed
LOC_Os11g05556	114.224	92.1467	69.8912	86.5428	86.4452	59.7736	73.5183	64.0472	59.2204	101.71	83.7752	57.0773	0.0724067	0.999904	0.137486	0.734707	0.999971	-0.0259329	0.0176664	0.571872	-0.181564	signal recognition particle 54 kDa protein, putative, expressed
LOC_Os01g68450	149.22	88.9431	92.5874	98.8899	74.7597	76.461	75.803	51.0544	85.7908	115.3	87.1833	82.6864	0.307653	0.999904	0.129863	0.320609	0.999971	-0.126432	0.0176819	0.571872	-0.301975	expressed protein
LOC_Os02g28220	2.25538	1.22301	1.18667	0.830938	1.04736	1.44451	1.6561	1.23039	1.47127	0.74043	0.588743	1.11963	0.0134851	0.999904	0.626397	0.217064	0.999971	0.312952	0.0177043	0.571872	0.601311	transferase family protein, putative, expressed
LOC_Os05g28500	68.1991	49.9895	48.6155	63.1968	52.1519	43.6559	49.793	48.5115	38.6697	61.402	54.3158	46.0871	0.718072	0.999904	0.0246939	0.770469	0.999971	-0.0199556	0.0177519	0.571872	-0.162152	ubiquitin family protein, putative, expressed
LOC_Os05g41210	304.559	261.627	243.395	256.047	232.594	281.725	301.461	298.495	280.402	251.56	249.533	253.034	0.321476	0.999904	0.0661188	0.760674	0.999971	0.0203136	0.0177656	0.571872	0.158087	OsCam2 - Calmodulin, expressed
LOC_Os03g01930	3.26993	2.36994	7.71394	2.92005	1.86145	6.52984	2.35518	1.56828	6.7654	4.36852	2.28032	7.21552	0.673525	0.999904	-0.0617021	0.112488	0.999971	-0.232434	0.017794	0.571872	-0.347072	retrotransposon protein, putative, unclassified, expressed
LOC_Os12g20144	44.4985	54.163	37.8099	50.0084	49.1284	35.1216	44.5179	43.0072	31.6406	49.2053	48.6537	41.6465	0.656968	0.999904	-0.0303993	0.500608	0.999971	-0.046104	0.0177977	0.571872	-0.162215	expressed protein
LOC_Os06g28840	14.3721	12.7907	7.21778	8.76523	13.3706	7.57699	7.49524	9.49518	5.1619	10.8777	10.7725	7.09555	0.170218	0.999904	0.155281	0.832338	0.999971	0.023969	0.0178276	0.572079	-0.268237	expressed protein
LOC_Os10g01080	16.3973	14.1327	53.8152	17.7806	12.4692	37.3048	8.23218	6.08675	30.9942	17.0747	14.8508	26.4571	0.312002	0.999904	0.206149	0.72467	0.999971	0.0718183	0.0178534	0.572154	-0.482965	SOR/SNZ family protein, putative, expressed
LOC_Os01g62890	7.54317	7.84174	10.4815	5.55146	8.11212	14.5045	6.83231	9.59582	13.3758	4.61481	6.10266	11.8485	0.134661	0.999904	0.205381	0.100701	0.999971	0.225356	0.017914	0.572633	0.325017	prenylated rab acceptor, putative, expressed
LOC_Os03g61100	0.406783	0.237431	0.0990791	0.299737	0.107922	0.0648996	0.153615	0.0761226	0	0.497338	0.537354	0.233489	0.448652	0.999904	-0.57351	0.180744	0.999971	-1.01314	0.0179798	0.572633	-1.79096	GDP-mannose transporter, putative, expressed
LOC_Os02g51480	28.7971	15.8517	9.43759	13.2835	15.1403	8.83394	11.1842	11.435	7.12635	18.4149	15.8318	9.3061	0.311937	0.999904	0.153619	0.360368	0.999971	-0.138958	0.0179832	0.572633	-0.359444	PPR repeat domain containing protein, putative, expressed
LOC_Os12g29570	23.2607	11.9006	10.9247	20.4891	8.83368	9.27779	11.3147	6.14656	8.17002	21.4313	14.8064	7.07957	0.607892	0.999904	0.0983864	0.620819	0.999971	-0.094859	0.0180203	0.572633	-0.453538	expressed protein
LOC_Os04g51050	14.4073	19.4897	21.3588	14.8645	23.1023	29.2682	21.0561	24.3677	29.4819	18.0563	20.6659	22.1662	0.214685	0.999904	-0.107545	0.439549	0.999971	0.0669959	0.0180257	0.572633	0.204994	OsWAK53b - OsWAK receptor-like protein kinase, expressed
LOC_Os06g43550	46.0617	42.4084	42.1582	41.3266	41.5271	44.8562	50.6591	45.9706	45.4456	38.5927	41.6751	40.2511	0.26051	0.999904	0.0797591	0.399129	0.999971	0.0597688	0.0180448	0.572633	0.167622	expressed protein
LOC_Os07g44140	9.53606	7.19426	12.2772	4.66058	8.36391	15.6646	6.72466	9.92422	15.6036	4.85795	4.76163	11.3933	0.0477555	0.999904	0.386283	0.148726	0.999971	0.281788	0.0181001	0.572633	0.461221	cytochrome P450 72A1, putative, expressed
LOC_Os04g44540	23.2393	23.5811	25.5183	21.7919	27.7252	23.2131	23.5454	28.4273	28.1814	19.445	23.5523	22.5682	0.245901	0.999904	0.100273	0.230008	0.999971	0.103728	0.0181139	0.572633	0.204224	mitochondrial carrier protein, putative, expressed
LOC_Os01g51140	0.642695	1.24953	0.652249	0.838737	0.761582	0.853869	1.01126	1.38393	0.388478	0.0991418	0.838331	0.245934	0.0201673	0.999904	1.04383	0.0184169	0.999971	1.05907	0.0181246	0.572633	1.06173	helix-loop-helix DNA-binding domain containing protein, expressed
LOC_Os02g44470	6.49031	9.2339	8.00295	7.89092	8.03919	5.35865	13.5109	9.1547	10.5923	5.20744	9.82903	4.61015	0.333673	0.999904	0.233066	0.612907	0.999971	0.121971	0.0181378	0.572633	0.569632	actin-depolymerizing factor, putative, expressed
LOC_Os06g41090	1.22754	1.52388	1.92782	1.25552	1.2468	3.01224	1.5256	1.75886	4.6774	1.14241	1.38992	2.16506	0.933456	0.999904	0.0153302	0.559946	0.999971	0.107026	0.0181454	0.572633	0.433785	anthranilate phosphoribosyltransferase, putative, expressed
LOC_Os10g38580	2.26817	1.98431	8.98997	4.15469	2.44291	3.01624	1.78483	1.72295	7.09637	6.03195	4.94808	9.05292	0.0730168	0.999904	-0.628639	0.0401134	0.999971	-0.71976	0.0181583	0.572633	-0.828392	glutathione S-transferase, putative, expressed
LOC_Os11g07800	0.323714	0.260164	0.205662	0.144876	0.058881	0.133132	0.0595105	0.102016	0	0.260177	0.121531	0.169538	0.59492	0.999904	0.379868	0.490422	0.999971	-0.492686	0.018196	0.572633	-1.68716	retrotransposon protein, putative, unclassified, expressed
LOC_Os06g06130	0.102092	0.134075	0.111898	0.11284	0.0812567	0.21989	0.028915	0.0143286	0	0.0624096	0.105963	0.120862	0.783229	0.999904	0.198811	0.686737	0.999971	0.291436	0.0182194	0.572633	-1.70627	glutamate receptor, putative, expressed
LOC_Os08g33000	0.92953	0.0861443	0.477345	0.119887	0.122121	0	0	0	0	0.400752	0.281624	0.340794	0.960267	0.999904	0.0491319	0.170196	0.999971	-1.35266	0.0183314	0.572633	-2.32632	expressed protein
LOC_Os11g24620	0.495689	1.47555	0.651962	1.97234	1.1244	1.70821	0.33694	0.250452	0.577839	1.6363	1.96439	1.15231	0.254052	0.999904	-0.652298	0.986864	0.999971	0.00941589	0.0183525	0.572633	-1.34881	expressed protein
LOC_Os11g12650	5.09691	2.91919	1.932	4.55373	2.91576	1.43323	3.21195	1.9851	0.891243	3.87525	2.38058	2.13933	0.472061	0.999904	0.124636	0.955158	0.999971	-0.00974556	0.0183611	0.572633	-0.408721	PHD-finger domain containing protein, putative, expressed
LOC_Os09g26190	31.1631	20.4187	13.379	22.1137	20.5206	10.1711	18.923	16.1165	9.54133	24.9802	17.7684	11.719	0.0418159	0.999904	0.163709	0.638679	0.999971	-0.037767	0.0183618	0.572633	-0.18968	CBS domain containing protein, expressed
LOC_Os03g04120	2.03042	1.47908	0.910412	2.14216	2.43784	1.49087	3.53982	1.94298	3.49659	2.34843	1.47606	1.405	0.397844	0.999904	-0.191343	0.486454	0.999971	0.157505	0.0183781	0.572633	0.533627	AMP-binding enzyme, putative, expressed
LOC_Os01g33070	0.943675	0.537034	0.051716	0.576347	0.253492	0.0338754	0.240545	0	0.0550035	0.432656	0.535992	0.274215	0.768435	0.999904	-0.215358	0.33621	0.999971	-0.703429	0.0183787	0.572633	-1.72471	pentatricopeptide repeat protein PPR868-14, putative, expressed
LOC_Os04g16838	217.988	108.986	127.525	122.389	166.47	86.8694	100.834	92.0261	56.3071	149.471	135.147	95.9466	0.418798	0.999904	0.14839	0.877919	0.999971	-0.0281925	0.0183849	0.572633	-0.432734	chloroplast 30S ribosomal protein S11, putative, expressed
LOC_Os10g21332	217.988	108.986	127.525	122.389	166.47	86.8694	100.834	92.0261	56.3071	149.471	135.147	95.9466	0.418798	0.999904	0.14839	0.877919	0.999971	-0.0281925	0.0183849	0.572633	-0.432734	chloroplast 30S ribosomal protein S11, putative, expressed
LOC_Os02g26890	2.86615	3.28608	2.91706	3.01702	2.77004	2.74365	2.37731	2.04005	2.14788	3.78578	3.59297	3.0626	0.473667	0.999904	-0.138539	0.310638	0.999971	-0.196032	0.01844	0.573154	-0.455656	PPR repeat containing protein, expressed
LOC_Os06g21590	1844.81	597.893	357.805	940.976	377.42	349.137	548.778	288.05	440.901	1670.54	561.61	445.982	0.936982	0.999904	-0.0199161	0.109324	0.999971	-0.403352	0.0184486	0.573154	-0.593601	chlorophyll A-B binding protein, putative, expressed
LOC_Os03g16824	14.6508	11.2438	10.7543	10.7522	11.7441	10.3141	14.1983	11.0402	14.112	10.5324	10.5694	10.3364	0.127748	0.999904	0.143322	0.645268	0.999971	0.0433197	0.0185496	0.575156	0.221561	spotted leaf 11, putative, expressed
LOC_Os05g34010	4.6443	3.41102	5.54344	5.31353	3.67349	2.92418	3.27995	3.88279	2.60417	5.33952	4.50491	5.36625	0.499479	0.999904	-0.128573	0.157056	0.999971	-0.269412	0.0185603	0.575156	-0.448228	peptide transporter PTR2, putative, expressed
LOC_Os03g09940	7.49974	5.32306	6.70379	7.16256	4.40081	3.84228	4.79473	4.27678	4.05303	6.86028	4.83329	5.70095	0.314271	0.999904	0.115305	0.202349	0.999971	-0.146081	0.0186066	0.575327	-0.269651	sulfate transporter, putative, expressed
LOC_Os12g06450	2.70011	2.22494	1.56678	1.7555	3.60283	1.14031	1.34954	0.802504	0	1.16513	3.14718	3.89738	0.849921	0.999904	-0.138987	0.765167	0.999971	-0.219406	0.0186488	0.575327	-1.72796	expressed protein
LOC_Os01g12374	2.186	3.8708	3.15904	2.33215	3.52123	1.56243	1.47712	2.51818	0.762865	2.98222	3.19546	2.07492	0.712291	0.999904	0.0992492	0.602222	0.999971	-0.140271	0.0186847	0.575327	-0.632923	expressed protein
LOC_Os04g59190	5.85394	0.88041	0.629815	2.73892	0.900406	0.876661	2.99047	1.21114	0.837314	2.24894	0.650627	0.278291	0.0152087	0.999904	0.677717	0.0516755	0.999971	0.543271	0.0187099	0.575327	0.656467	peroxidase precursor, putative, expressed
LOC_Os06g37610	76.657	51.4199	39.3697	44.4019	56.8614	33.9951	42.3611	35.2167	27.7933	58.445	48.0768	33.6113	0.151377	0.999904	0.165067	0.795493	0.999971	-0.0298202	0.018721	0.575327	-0.270497	Cyclopropane-fatty-acyl-phospholipid synthase, putative, expressed
LOC_Os04g35140	5.90678	7.03791	5.46814	6.25044	6.87521	8.61968	7.11947	7.56711	9.56061	5.23981	7.36696	5.91732	0.986038	0.999904	-0.00204394	0.162764	0.999971	0.163035	0.0187212	0.575327	0.274604	OsSub41 - Putative Subtilisin homologue, expressed
LOC_Os07g44440	3.98581	2.97897	6.81937	1.82663	3.3658	7.60766	5.45167	3.52018	3.05981	1.33713	0.715479	3.38987	0.00920537	0.999904	1.04811	0.0304253	0.999971	0.871103	0.0187309	0.575327	0.946093	peroxiredoxin, putative, expressed
LOC_Os03g06630	8.4724	6.05985	56.7401	9.53772	5.72407	65.1098	5.39909	5.58217	62.3986	13.0277	8.92969	56.9415	0.121153	0.999904	-0.273731	0.245874	0.999971	-0.204939	0.0188083	0.575874	-0.414903	heat stress transcription factor, putative, expressed
LOC_Os11g05540	14.037	7.49611	4.84032	8.56671	6.95353	4.72992	8.3852	5.44543	2.91546	9.73101	7.54629	4.19486	0.154258	0.999904	0.166968	0.813242	0.999971	-0.0276878	0.0188432	0.575874	-0.275257	rhoGAP domain containing protein, expressed
LOC_Os11g13500	12.1129	11.3429	7.0351	8.77793	7.87993	5.0841	9.02109	3.88958	0.848164	15.039	5.40286	6.40594	0.602887	0.999904	0.202944	0.743313	0.999971	-0.127742	0.0188488	0.575874	-0.916124	expressed protein
LOC_Os08g07360	0.0776198	0.125166	0.0701654	0.213061	0.156722	0.109603	0.0377233	0.0983137	0	0.151549	0.0921282	0.101571	0.702303	0.999904	-0.232049	0.613693	0.999971	0.306479	0.0188511	0.575874	-1.4258	transposon protein, putative, CACTA, En/Spm sub-class, expressed
LOC_Os07g06080	19.4021	16.2554	12.3391	15.3088	13.7821	13.2104	16.6195	17.5246	18.0314	14.5482	15.7818	11.0449	0.17514	0.999904	0.142221	0.749308	0.999971	0.0335187	0.0188668	0.575874	0.246304	FAD dependent oxidoreductase domain containing protein, expressed
LOC_Os04g31010	71.8931	48.8674	44.9168	53.2922	62.6859	40.2998	48.5783	40.4369	34.8729	58.3458	56.1892	42.0486	0.648258	0.999904	0.0446006	0.952455	0.999971	-0.00582944	0.0191049	0.582323	-0.229119	expressed protein
LOC_Os03g02710	3.81415	3.80317	5.86434	4.77192	4.36389	4.56393	3.2858	3.30112	2.56278	4.85754	3.97377	4.34436	0.97749	0.999904	0.00437311	0.778212	0.999971	0.0436519	0.0191658	0.582323	-0.363023	hydroxymethylglutaryl-CoA synthase, putative, expressed
LOC_Os12g02720	1.04372	0.272329	0.736758	2.75461	0.299581	1.44791	1.24451	1.69568	2.15872	0.920245	0.291432	0.70748	0.940981	0.999904	0.0327843	0.171583	0.999971	0.605378	0.0191746	0.582323	1.03711	DUF567 domain containing protein, putative, expressed
LOC_Os03g27870	0.239594	0.392283	0.22947	0.238432	0.254603	0.301372	0.206143	0.17627	0	0.379175	0.461484	0.325276	0.672533	0.999904	-0.315521	0.622973	0.999971	-0.367003	0.0191957	0.582323	-1.74805	transposon protein, putative, CACTA, En/Spm sub-class, expressed
LOC_Os01g59090	50.9499	21.4513	11.5162	22.9759	25.9802	9.72197	18.6247	16.9713	8.6583	41.9849	23.127	11.3762	0.826756	0.999904	0.0430736	0.280699	0.999971	-0.212303	0.0192154	0.582323	-0.460785	thylakoid lumenal 20 kDa protein, putative, expressed
LOC_Os10g34310	5.68202	5.65069	6.76791	5.2623	5.57567	6.72102	4.63273	4.06032	5.52228	6.17779	6.05636	6.73091	0.690177	0.999904	-0.0495152	0.523078	0.999971	-0.0793269	0.0192277	0.582323	-0.290806	PPR repeat containing protein, expressed
LOC_Os04g16710	0.362679	1.79426	0.851722	0.634139	0.889309	0.679399	0.502047	0.399485	0	1.80709	1.55131	0.682071	0.606634	0.999904	-0.388057	0.496479	0.999971	-0.512532	0.0192558	0.582323	-1.76402	retrotransposon protein, putative, Ty3-gypsy subclass
LOC_Os02g20970	27.8961	29.3553	28.9832	25.9658	32.4372	35.5143	30.2741	38.211	33.6658	27.7728	28.8779	29.5175	0.99538	0.999904	0.000419908	0.269954	0.999971	0.0799949	0.0192691	0.582323	0.169703	C2 domain containing protein, putative, expressed
LOC_Os09g14614	17.6249	16.6931	12.195	13.007	15.1269	10.3131	11.4295	11.9187	5.39966	13.5653	12.4918	12.3695	0.225439	0.999904	0.178554	0.952691	0.999971	-0.00873885	0.0193054	0.582605	-0.344616	serine/arginine repetitive matrix protein 1, putative, expressed
LOC_Os10g24290	0.614186	0.631591	0.494404	0.365133	0.0412889	0.19059	0	0.177447	0	0.237693	0.305015	0.238753	0.328557	0.999904	0.756875	0.534747	0.999971	-0.480898	0.0193412	0.582605	-1.81188	retrotransposon protein, putative, unclassified, expressed
LOC_Os03g15960	15.6539	29.1202	26.8564	18.646	20.218	39.0658	19.3506	24.0691	64.1581	12.7171	19.0929	32.4006	0.443857	0.999904	0.146754	0.271442	0.999971	0.210779	0.0193501	0.582605	0.44824	hsp20/alpha crystallin family protein, putative, expressed
LOC_Os04g27860	612.143	603.191	748.37	597.008	491.595	892.137	675.164	706.05	1115.76	648.317	580.926	817.489	0.646706	0.999904	-0.0364671	0.513983	0.999971	-0.0519266	0.0194073	0.583274	0.185987	40S ribosomal protein S27, putative, expressed
LOC_Os03g19250	81.9833	71.8409	45.4145	81.1977	60.8348	59.0279	90.7172	71.9235	67.1007	79.8469	56.3191	53.6023	0.692951	0.999904	0.0342515	0.450333	0.999971	0.0654801	0.0194343	0.583274	0.202731	AMP-binding enzyme, putative, expressed
LOC_Os01g71340	37.7949	61.3133	65.4708	51.2171	43.8529	91.2349	67.5872	95.7641	164.752	57.0309	48.3705	117.74	0.137678	0.999904	-0.254099	0.376268	0.999971	-0.151449	0.0194441	0.583274	0.400005	glycosyl hydrolases family 17, putative, expressed
LOC_Os05g06710	36.9213	31.6759	36.704	36.7394	37.4051	44.4947	39.8207	44.3469	52.2951	36.1224	38.3057	40.7114	0.207336	0.999904	-0.0909998	0.68395	0.999971	0.0293785	0.0195176	0.58476	0.16855	GDSL-like lipase/acylhydrolase, putative, expressed
LOC_Os04g52870	21.1678	22.8351	27.114	23.814	25.6603	28.8117	19.6274	22.1226	22.0566	23.3961	24.907	28.3006	0.310625	0.999904	-0.0769913	0.753516	0.999971	0.0238441	0.0195802	0.585656	-0.177255	OsFBW1 - F-box domain and WD40 repeat containing protein, expressed
LOC_Os01g53294	18.7381	17.0172	28.2708	21.2705	13.9063	30.3663	21.4559	19.2058	28.9687	16.7177	16.6688	22.2264	0.19101	0.999904	0.124629	0.186462	0.999971	0.125918	0.0195955	0.585656	0.222458	respiratory burst oxidase protein B, putative, expressed
LOC_Os11g07120	4.52071	5.45854	2.66399	3.15337	4.54955	3.12718	4.56505	5.50355	4.23673	2.92432	5.66445	2.37286	0.234977	0.999904	0.170661	0.749099	0.999971	0.0459587	0.019644	0.58602	0.335259	receptor kinase-like protein, identical, putative, expressed
LOC_Os05g44922	53.8917	43.2993	48.0917	47.6915	43.0932	51.7019	51.3623	53.0105	53.8564	40.9367	46.2622	48.4842	0.33226	0.999904	0.0664319	0.459184	0.999971	0.0507155	0.0196558	0.58602	0.15984	6-phosphofructokinase, putative, expressed
LOC_Os03g53580	0.860177	0.632606	0.301696	1.29299	0.595627	0.271727	0.760106	0.34769	0	1.3882	0.584373	0.422141	0.706011	0.999904	-0.239271	0.806119	0.999971	-0.15568	0.0196861	0.58605	-1.47937	expressed protein
LOC_Os08g44390	16.6033	10.4952	21.7596	17.0846	12.8093	31.7842	16.5848	11.9967	31.5844	13.7019	9.46242	24.7327	0.571183	0.999904	0.0553476	0.00782495	0.999971	0.259926	0.0197147	0.58605	0.227889	EF hand family protein, putative, expressed
LOC_Os01g46932	45.0914	57.8341	65.7122	48.0097	61.441	74.3448	56.5817	61.1035	75.4551	46.2637	53.927	61.5478	0.640508	0.999904	0.0361361	0.118509	0.999971	0.120797	0.0197288	0.58605	0.180411	vacuolar protein-sorting-associated protein 25, putative, expressed
LOC_Os02g14280	4.05374	1.2805	0.719285	3.25735	1.51626	0.468358	2.89446	0.966057	0.238152	3.92223	1.16219	0.643123	0.701227	0.999904	0.079612	0.714312	0.999971	-0.0759613	0.0197547	0.586104	-0.483686	transposon protein, putative, unclassified, expressed
LOC_Os07g32570	78.7788	84.9396	165.298	91.4594	77.863	156.085	53.1152	73.5393	133.222	100.21	78.9372	147.951	0.86629	0.999904	-0.0192517	0.894716	0.999971	-0.0151317	0.0198583	0.588461	-0.266299	OsAPRL1 adenosine 5'-phosphosulfate reductase-like OsAPRL1, expressed
LOC_Os11g15080	0.181277	0.158711	0	0.0667867	0.432843	0.0216912	0.102684	0	0	0.221631	0.200082	0.156076	0.253791	0.999904	-0.979418	0.459119	0.999971	-0.635356	0.019902	0.589042	-1.99815	retrotransposon protein, putative, Ty3-gypsy subclass, expressed
LOC_Os10g12620	0.691688	0.86146	0.394917	0.755909	0.993118	0.806612	1.08126	1.36559	0.881558	0.459892	0.886357	0.646416	0.869491	0.999904	-0.0375561	0.226005	0.999971	0.276738	0.0199421	0.589511	0.531993	protein kinase domain containing protein, expressed
LOC_Os06g36560	7.79051	5.49305	18.0228	4.23959	10.4369	24.6783	9.6512	14.0973	15.5734	3.92625	4.6125	14.2279	0.229531	0.999904	0.364265	0.111347	0.999971	0.482678	0.020072	0.592633	0.704841	inositol oxygenase, putative, expressed
LOC_Os11g30760	2.80366	1.96372	3.891	3.82104	1.19012	3.62317	2.31091	2.92337	5.73768	2.03203	1.48162	2.10874	0.121404	0.999904	0.400481	0.219283	0.999971	0.317621	0.02013	0.592806	0.600865	expressed protein
LOC_Os02g42230	29.548	33.5537	31.0421	28.8463	38.7997	34.8062	34.6472	39.2761	33.8195	30.1166	31.4169	28.0389	0.543243	0.999904	0.0490366	0.106924	0.999971	0.130044	0.0202	0.592806	0.18735	RPA2B - Putative single-stranded DNA binding complex subunit 2, expressed
LOC_Os01g53330	10.9118	3.7635	5.01351	9.92862	2.58244	2.6905	4.35479	2.13478	3.40491	10.9153	2.57399	4.44834	0.396386	0.999904	0.165357	0.31622	0.999971	-0.195415	0.0202215	0.592806	-0.452775	anthocyanidin 5,3-O-glucosyltransferase, putative, expressed
LOC_Os09g08480	7.07017	5.01396	1.85983	4.76682	3.71399	3.90852	3.00367	2.44105	1.56596	4.40848	4.40295	3.10453	0.895829	0.999904	0.0305926	0.838232	0.999971	0.047701	0.0202256	0.592806	-0.54257	expressed protein
LOC_Os06g51290	96.1759	35.3319	29.7401	49.3319	35.8443	29.6819	35.5159	27.5474	26.5592	84.8044	33.8331	33.854	0.945691	0.999904	0.012779	0.278998	0.999971	-0.203089	0.0202416	0.592806	-0.435574	phytoene synthase, chloroplast precursor, putative, expressed
LOC_Os03g64200	5.51479	4.98872	5.02035	5.58909	4.29817	4.3934	6.44489	4.93715	5.72394	4.26724	4.3772	4.2473	0.127486	0.999904	0.184059	0.4217	0.999971	0.0970325	0.0202478	0.592806	0.280385	ABC-2 type transporter, putative, expressed
LOC_Os03g56420	62.6743	31.7593	38.1266	42.1	33.5873	39.726	42.82	27.2129	29.908	57.3083	30.9361	38.283	0.695637	0.999904	0.0367831	0.516511	0.999971	-0.0609954	0.0202513	0.592806	-0.218288	expressed protein
LOC_Os02g55890	0.254367	0.445406	0.371733	0.374859	0.475768	0.158272	0.864516	0.528365	0.474436	0.326542	0.355215	0.175205	0.481001	0.999904	0.23585	0.741892	0.999971	0.110228	0.0202723	0.592806	0.776895	inorganic H+ pyrophosphatase, putative, expressed
LOC_Os02g48340	36.9959	32.3146	31.1657	36.8639	37.6748	35.4352	41.3177	37.6082	31.7363	31.0793	28.491	33.7922	0.322791	0.999904	0.0726381	0.022322	0.999971	0.167857	0.0204319	0.596759	0.170316	RNA recognition motif containing protein, putative, expressed
LOC_Os12g43700	0.26141	0.203439	0.159177	0.321032	0.294752	0.145972	0.0493585	0.220133	0	0.266336	0.147994	0.393872	0.767514	0.999904	-0.19439	0.956585	0.999971	-0.0357962	0.0205224	0.598684	-1.52331	SCP-like extracellular protein, expressed
LOC_Os02g20360	3.59567	2.33588	2.98466	3.56606	1.48151	8.4512	1.89789	0.809863	2.67618	6.34368	2.05225	3.24164	0.600103	0.999904	-0.173654	0.948548	0.999971	0.0213751	0.0205886	0.599043	-0.76697	tyrosine aminotransferase, putative, expressed
LOC_Os04g46990	0.989891	0.892042	2.81953	1.40452	0.626143	0.785906	0.394272	0.410755	1.37588	2.25422	1.08771	1.43515	0.769687	0.999904	-0.11381	0.169825	0.999971	-0.533616	0.0206308	0.599043	-0.89975	cis-zeatin O-glucosyltransferase, putative, expressed
LOC_Os02g49300	0.117343	0	0.368482	0.542871	0.0734395	0.338073	0	0.0310996	0	0.154213	0.11758	0.143073	0.483747	0.999904	-0.75302	0.613559	0.999971	0.543026	0.0206761	0.599043	-2.48808	transposon protein, putative, CACTA, En/Spm sub-class, expressed
LOC_Os06g19570	1.95371	3.27009	2.89715	0.61551	1.04694	3.19851	0	2.04208	0	1.28279	1.01554	2.44907	0.608106	0.999904	0.577101	0.902663	0.999971	-0.137639	0.0206877	0.599043	-2.60385	expressed protein
LOC_Os04g43770	49.2752	59.3463	58.7105	53.6497	58.5357	49.3694	51.658	48.9266	28.8637	60.0198	60.0955	51.6068	0.837273	0.999904	-0.0273489	0.658635	0.999971	-0.0588301	0.020715	0.599043	-0.308018	expressed protein
LOC_Os12g37060	84.2372	95.7341	107.161	89.1406	93.7884	142.338	109.255	112.125	144.889	94.7338	98.7948	119.354	0.208627	0.999904	-0.0859676	0.735104	0.999971	0.0231333	0.0207204	0.599043	0.158147	expressed protein
LOC_Os01g67860	178.728	172.329	183.482	153.295	157.299	222.406	195.751	205.459	248.874	159.535	185.459	211.874	0.612487	0.999904	-0.0349962	0.469556	0.999971	-0.0499664	0.0207284	0.599043	0.159799	fructose-bisphospate aldolase isozyme, putative, expressed
LOC_Os06g07550	8.47687	6.5989	2.8588	6.12605	6.0905	2.86397	5.05159	3.60149	2.01212	6.33091	5.49395	2.60069	0.140691	0.999904	0.189194	0.654613	0.999971	0.057451	0.0207312	0.599043	-0.297019	PPR repeat domain containing protein, putative, expressed
LOC_Os07g47660	0.701675	1.1409	0.329603	0.553959	0.957385	0.719665	1.53308	1.35058	1.63593	0.183831	0.964735	0.194185	0.326637	0.999904	0.597141	0.244848	0.999971	0.707962	0.0209402	0.601038	1.40567	expressed protein
LOC_Os09g15320	11.1594	7.40488	8.13918	7.33924	7.63456	8.74468	12.8754	9.1488	14.5423	11.1925	6.55088	8.26021	0.820348	0.999904	0.0343712	0.651175	0.999971	-0.0684298	0.0209546	0.601038	0.349436	ubiquitin-conjugating enzyme, putative, expressed
LOC_Os01g57854	4.02458	4.58777	5.80259	4.14971	4.19214	6.59333	4.59005	5.6864	8.43852	3.49224	3.73117	6.57555	0.591923	0.999904	0.0737944	0.47217	0.999971	0.0989733	0.0209866	0.601038	0.317757	pectinesterase, putative, expressed
LOC_Os09g02560	1.50425	0.720231	0.90165	0.757694	0.73659	1.08278	0.23299	0.346369	0	0.628601	0.931445	1.41655	0.943782	0.999904	0.0501174	0.889079	0.999971	-0.0991231	0.0209974	0.601038	-1.64035	expressed protein
LOC_Os05g05820	1.76118	1.16433	0.630317	1.50959	0.686571	1.05799	0.855102	0.484273	0.125697	1.4831	0.569752	0.789118	0.536632	0.999904	0.216603	0.638813	0.999971	0.164529	0.021019	0.601038	-0.80892	pro-resilin precursor, putative, expressed
LOC_Os01g09010	101.021	94.5088	98.0835	108.558	92.811	116.926	100.144	123.667	146.285	99.8222	88.6324	114.701	0.74984	0.999904	-0.027225	0.544312	0.999971	0.0517693	0.0210511	0.601038	0.196989	transferase family protein, putative, expressed
LOC_Os06g02800	0.539404	0.0590324	0.147804	1.04333	0.362239	0.387263	0.572898	0.965244	2.8296	0.556439	0.267204	0.0435392	0.868507	0.999904	-0.117401	0.21754	0.999971	0.874432	0.021063	0.601038	1.63587	expressed protein
LOC_Os12g19470	657.35	200.672	239.82	251.513	159.044	223.084	139.446	110.193	237.025	531.672	197.252	253.397	0.839921	0.999904	0.0576698	0.205216	0.999971	-0.361682	0.0210644	0.601038	-0.658603	ribulose bisphosphate carboxylase small chain, chloroplast precursor, putative, expressed
LOC_Os01g44960	1.6262	0.576288	1.18827	0.641926	0.855174	2.61303	1.11855	1.01076	4.19764	0.568061	0.482246	1.65016	0.382747	0.999904	0.293047	0.258386	0.999971	0.379455	0.0210736	0.601038	0.774433	hydrolase, alpha/beta fold family domain containing protein, expressed
LOC_Os01g68770	169.881	126.643	86.2749	129.614	121.193	103.538	159.268	143.904	106.244	128.175	107.367	97.6017	0.220425	0.999904	0.107383	0.452538	0.999971	0.0658275	0.0210823	0.601038	0.202121	selenium-binding protein, putative, expressed
LOC_Os01g66320	60.0093	57.9608	46.5711	70.333	54.7845	52.6255	53.555	47.2695	44.1324	66.6592	60.2516	47.3651	0.472972	0.999904	-0.0540001	0.756612	0.999971	0.023321	0.0211125	0.601038	-0.173513	expressed protein
LOC_Os05g22730	126.42	55.3788	66.1684	70.0987	56.9909	64.5263	39.3355	40.0558	58.0196	107.215	60.1946	60.6646	0.789633	0.999904	0.0556292	0.510579	0.999971	-0.13719	0.0211412	0.601038	-0.480721	expressed protein
LOC_Os05g50960	0.725508	0	0.380311	0.592697	0.0941484	0.135881	0.321624	0	0	0.52064	0.267872	0.142583	0.491745	0.999904	-0.583274	0.732727	0.999971	-0.289712	0.0211533	0.601038	-1.95566	polygalacturonase, putative, expressed
LOC_Os12g23470	0.419606	1.599	0.689867	1.05129	1.25239	0.150627	0	0.35335	0	1.15429	0.937193	0.948346	0.788603	0.999904	-0.226128	0.616812	0.999971	-0.422	0.0211824	0.601038	-1.94373	retrotransposon protein, putative, unclassified
LOC_Os01g02890	0.0995388	0.377642	0.181833	0.165026	0.227771	0.285854	0.0281919	0.237495	0	0.228183	0.385076	0.0749887	0.991646	0.999904	0.00721624	0.827135	0.999971	0.150499	0.0211908	0.601038	-1.58824	phosphatidylserine synthase, putative, expressed
LOC_Os03g10440	0.380528	0.301324	0.551411	0.89661	0.317743	0.701137	0.97667	0.951015	1.39031	0.867698	0.340273	0.518916	0.342664	0.999904	-0.290021	0.769888	0.999971	0.0894043	0.021201	0.601038	0.704298	glycosyl hydrolase family 10 protein, putative, expressed
LOC_Os08g33140	18.1454	13.7263	18.701	18.7252	14.3165	17.0026	20.3524	17.0287	20.2756	15.9212	13.1859	18.013	0.449656	0.999904	0.0689799	0.481359	0.999971	0.064247	0.0212386	0.601038	0.210202	F-box domain containing protein, expressed
LOC_Os01g10130	1.22478	1.2554	2.03001	0.924487	0.463634	1.75865	0.609169	0.35218	1.39294	1.3696	0.963984	1.89041	0.80707	0.999904	0.0732749	0.193148	0.999971	-0.390464	0.0212631	0.601038	-0.691104	RNA-dependent RNA polymerase, putative, expressed
LOC_Os03g13930	0.826889	0.783057	1.22075	1.23102	0.987202	1.97484	1.46253	1.23633	3.71801	0.897491	1.0318	1.88519	0.179648	0.999904	-0.262823	0.583389	0.999971	0.107422	0.0212685	0.601038	0.451119	OsSub28 - Putative Subtilisin homologue, expressed
LOC_Os03g15630	6.06134	5.88276	5.76805	8.41325	5.02066	8.60224	7.34598	8.38839	12.9267	7.53994	5.40003	5.97726	0.744352	0.999904	-0.0563647	0.433776	0.999971	0.135296	0.0213014	0.601209	0.397998	harpin-induced protein 1 domain containing protein, expressed
LOC_Os08g15040	70.5478	70.5595	69.9508	67.157	68.9998	68.2015	77.2943	77.4537	76.8045	56.0092	73.3447	70.034	0.363761	0.999904	0.0631739	0.631578	0.999971	0.0333535	0.0213629	0.601209	0.160088	ADP-ribosylation factor, putative, expressed
LOC_Os05g11910	6.88519	3.46476	2.15112	4.58735	2.15104	2.4023	6.12355	5.28324	4.53822	5.72341	2.75043	2.82552	0.785962	0.999904	0.0472624	0.23486	0.999971	-0.20675	0.021425	0.601209	0.400367	GDSL-like lipase/acylhydrolase, putative, expressed
LOC_Os03g05520	2.56977	4.4519	3.17617	4.23023	4.99363	2.43377	2.0441	3.36111	1.91212	3.76018	3.62163	4.4133	0.441513	0.999904	-0.166865	0.81982	0.999971	-0.049384	0.0214362	0.601209	-0.498707	nicotiana lesion-inducing like, putative, expressed
LOC_Os04g59540	0.479314	0.264562	3.06076	0.552807	0.14306	0.785497	0.389555	0.193041	1.08106	0.831252	0.460128	1.65522	0.584302	0.999904	-0.160124	0.00917586	0.999971	-0.762536	0.0214365	0.601209	-0.673206	phosphatidylinositol-4-phosphate 5-Kinase, putative, expressed
LOC_Os04g33980	1.00315	0.699644	1.13678	1.61615	0.698014	1.28172	1.58913	1.41746	1.38742	1.26284	0.818189	0.735605	0.93948	0.999904	0.0155805	0.294677	0.999971	0.215045	0.0215024	0.601209	0.471791	transposon protein, putative, Mutator sub-class, expressed
LOC_Os04g25440	68.7544	51.5386	44.3993	67.3139	41.0075	39.758	49.3585	41.1282	37.3881	59.3722	49.5073	42.5103	0.279581	0.999904	0.0763466	0.559715	0.999971	-0.0411837	0.021531	0.601209	-0.162297	cytokinin-O-glucosyltransferase 2, putative, expressed
LOC_Os01g48620	0.808258	1.7917	3.1289	1.0454	1.43717	1.247	1.63653	1.8102	1.56367	0.488837	0.769131	1.59908	0.0237531	0.999904	0.668103	0.201931	0.999971	0.37705	0.0215817	0.601209	0.678904	expressed protein
LOC_Os03g27590	10.7814	14.0833	12.9618	9.30266	12.2607	17.6038	15.1636	15.8881	19.4885	11.989	13.7619	10.6449	0.794947	0.999904	0.0374886	0.746385	0.999971	0.0466509	0.0215863	0.601209	0.331417	OsSCP18 - Putative Serine Carboxypeptidase homologue, expressed
LOC_Os03g19280	62.1849	54.9402	39.3276	47.2621	44.4802	46.0207	63.6336	62.9073	60.6029	56.1058	55.1369	41.8624	0.898341	0.999904	0.011845	0.304871	0.999971	-0.0951291	0.0215892	0.601209	0.213013	argininosuccinate lyase, putative, expressed
LOC_Os03g41510	39.1948	26.9095	17.6899	20.6677	21.8156	14.8709	19.3573	15.4758	14.6058	30.0857	24.5023	14.3877	0.138499	0.999904	0.187735	0.234283	0.999971	-0.150729	0.0216024	0.601209	-0.291129	oxidoreductase, aldo/keto reductase family protein, putative, expressed
LOC_Os03g63870	37.3998	34.3082	38.1211	43.7712	35.2634	33.9685	27.0301	26.3604	30.7382	34.6747	38.957	30.8868	0.567116	0.999904	0.0525592	0.394591	0.999971	0.0781835	0.0216293	0.601209	-0.210934	expressed protein
LOC_Os06g28820	2.3787	2.27934	2.15002	2.33938	2.66027	1.22011	2.26031	1.97157	1.33829	2.83218	2.68677	1.97424	0.52081	0.999904	-0.0848592	0.0888537	0.999971	-0.224866	0.0216488	0.601209	-0.303501	cycloartenol synthase, putative, expressed
LOC_Os08g42430	8.9552	1.25835	1.69649	13.1973	1.45192	1.11125	7.13932	0.837908	0.386642	9.63085	1.81514	1.78479	0.656497	0.999904	-0.159213	0.741182	0.999971	-0.118236	0.0216638	0.601209	-0.821997	membrane associated DUF588 domain containing protein, putative, expressed
LOC_Os01g06200	0.128556	0.0685542	0.0736362	0.143253	0.0764972	0.133171	0.144561	0.172925	0.252204	0	0.0642351	0.0459018	0.17052	0.999904	1.04609	0.0898689	0.999971	1.29457	0.0216932	0.601209	1.75224	retrotransposon protein, putative, unclassified, expressed
LOC_Os09g30060	2.07469	1.58952	1.51612	1.77458	1.52843	1.45466	0.203312	1.56324	0.561113	1.26844	1.98262	2.70074	0.83756	0.999904	-0.100903	0.721599	0.999971	-0.175373	0.0217469	0.601209	-1.12942	expressed protein
LOC_Os03g24860	42.9678	27.8522	23.7977	28.3181	25.1382	20.6682	25.2119	19.7975	21.2528	32.0745	27.4754	22.1084	0.145512	0.999904	0.126066	0.290689	0.999971	-0.0915126	0.0217658	0.601209	-0.19872	transporter family protein, putative, expressed
LOC_Os01g23740	174.735	170.047	151.005	163.777	174.749	157.965	187.004	205.549	175.433	158.752	177.294	153.482	0.85409	0.999904	0.0122056	0.795368	0.999971	0.0172128	0.0217872	0.601209	0.152257	OsPDIL2-2 protein disulfide isomerase PDIL2-2, expressed
LOC_Os04g51410	18.1147	24.009	47.3216	17.9641	31.5851	54.3347	21.5361	38.4072	61.6811	16.8731	30.0365	50.3956	0.478565	0.999904	-0.0723465	0.52622	0.999971	0.0647071	0.0217903	0.601209	0.234209	expressed protein
LOC_Os04g44590	89.3827	97.9352	83.6904	76.7462	80.6439	88.923	54.9774	77.8018	78.6584	85.9788	87.6708	83.006	0.55556	0.999904	0.0521294	0.645445	0.999971	-0.04069	0.0217994	0.601209	-0.202862	expressed protein
LOC_Os05g48630	1157.38	487.597	247.446	579.726	346.514	241.301	466.625	258.915	284.386	926.032	454.082	300.92	0.862943	0.999904	0.0324257	0.0906997	0.999971	-0.317763	0.0218493	0.601209	-0.430701	expressed protein
LOC_Os07g41080	23.6673	16.5313	13.7623	16.1823	15.0188	13.6241	18.0362	11.8704	8.92039	20.9634	15.8132	11.5042	0.24656	0.999904	0.114472	0.648556	0.999971	-0.0450252	0.021857	0.601209	-0.226508	hydrolase, alpha/beta fold family domain containing protein, expressed
LOC_Os03g13570	0.483642	0.254063	0.530098	0.356371	0.423432	0.717607	0.109584	0.217213	0.112759	0.413915	0.328569	0.666253	0.824842	0.999904	-0.106191	0.901208	0.999971	0.0595611	0.0218875	0.601209	-1.09986	glycosyl hydrolases family 16, putative, expressed
LOC_Os03g56270	4.20258	0.769338	0.446667	2.50548	0.78301	0.229311	1.02845	0.574607	0.20309	3.37482	0.555582	0.373433	0.343794	0.999904	0.238919	0.571021	0.999971	-0.142981	0.0218926	0.601209	-0.578493	receptor protein kinase CLAVATA1 precursor, putative, expressed
LOC_Os10g29310	2.16318	1.64553	0.971707	1.05827	1.56648	1.83311	2.71181	1.88134	1.9016	1.1381	1.1845	1.30525	0.368089	0.999904	0.222803	0.461505	0.999971	0.182284	0.0219189	0.601209	0.567312	MBTB51 - Bric-a-Brac, Tramtrack, Broad Complex BTB domain with Meprin and TRAF Homology MATH domain, expressed
LOC_Os10g33760	0.0343808	0.180607	2.86393	0.190001	0.45151	0.0740509	0	0.0579042	0	0.220681	0.13625	0.732634	0.988252	0.999904	0.0157276	0.723519	0.999971	-0.377875	0.0219259	0.601209	-2.44787	No apical meristem protein, putative, expressed
LOC_Os03g09090	13.8942	16.4452	22.7069	13.983	20.6606	26.7726	15.9598	22.5166	24.2791	11.9299	17.0143	23.9015	0.801138	0.999904	0.0219111	0.0703828	0.999971	0.157407	0.0219563	0.601209	0.199309	expressed protein
LOC_Os04g31040	47.5072	35.712	16.0396	26.5826	29.0009	16.3889	21.0778	17.5996	14.977	36.9679	26.8849	16.3427	0.266438	0.999904	0.171521	0.596762	0.999971	-0.0816566	0.0219648	0.601209	-0.353594	violaxanthin de-epoxidase, putative, expressed
LOC_Os11g24030	0.960014	1.10764	0.933514	1.6299	2.50103	2.51018	0.97221	0.49178	0.287341	2.59157	2.28389	1.53015	0.218226	0.999904	-0.721095	0.942782	0.999971	0.042035	0.0220893	0.60378	-1.34047	retrotransposon protein, putative, unclassified
LOC_Os02g17920	62.9032	30.7738	27.3844	25.3352	26.6099	19.3125	21.9297	14.8616	19.9549	47.6297	27.3886	19.577	0.218733	0.999904	0.242895	0.260043	0.999971	-0.222432	0.0221302	0.60378	-0.451884	glyoxalase family protein, putative, expressed
LOC_Os10g35030	237.743	84.1882	122.29	143.337	62.5552	93.276	69.6051	47.8497	103.656	231.574	64.8137	108.192	0.542576	0.999904	0.136322	0.327727	0.999971	-0.219106	0.022133	0.60378	-0.512242	IAP100, putative, expressed
LOC_Os08g39960	38.0716	37.973	36.3441	31.7223	39.4911	41.9513	37.8714	46.6797	42.3499	30.8387	38.8812	34.5421	0.369904	0.999904	0.0788118	0.354541	0.999971	0.0813752	0.0221903	0.604668	0.201025	3-oxoacyl-reductase, chloroplast precursor, putative, expressed
LOC_Os03g18890	16.7201	10.4288	10.3268	10.009	5.95937	7.02724	11.6142	21.8702	15.4791	10.4748	9.06512	9.20487	0.276498	0.999904	0.240273	0.271934	0.999971	-0.242569	0.0222815	0.606007	0.504633	glycosyl transferase 8 domain containing protein, putative, expressed
LOC_Os08g30340	4.30465	7.18299	4.1995	3.24664	5.47266	4.31754	3.53356	4.67134	2.16347	3.77601	6.65309	4.2811	0.694861	0.999904	0.0622023	0.486836	0.999971	-0.110262	0.0223136	0.606007	-0.362333	PAS2, putative, expressed
LOC_Os02g38230	0.179236	0.313849	0.196452	0.0660348	1.03426	0.257363	0	0.35218	0	0.383488	0.372064	0.385798	0.544966	0.999904	-0.487469	0.71714	0.999971	-0.291749	0.0223398	0.606007	-1.83976	high affinity nitrate transporter, putative, expressed
LOC_Os01g06240	0.0981882	0.171932	0.516574	0.17364	0.222726	0.197383	0.100114	0.0165369	0	0.108042	0.111176	0.278977	0.68018	0.999904	0.30749	0.728938	0.999971	0.258497	0.0223466	0.606007	-1.70404	protein kinase, putative, expressed
LOC_Os04g48800	72.8189	59.8198	33.4046	50.8325	57.9145	27.7112	54.3245	34.9568	26.2496	63.979	53.1563	30.1645	0.262933	0.999904	0.116047	0.473566	0.999971	-0.0742925	0.0224318	0.606007	-0.236655	GDSL-like lipase/acylhydrolase, putative, expressed
LOC_Os01g74030	11.7456	10.1113	6.46562	12.6923	11.0257	6.49392	13.0986	12.3195	8.32837	10.025	10.4494	7.29675	0.989495	0.999904	0.00110626	0.477305	0.999971	0.0597116	0.0224339	0.606007	0.191823	pumilio-family RNA binding protein, putative, expressed
LOC_Os02g45920	19.4472	16.2554	15.8188	19.2774	17.8877	15.0158	21.6576	19.3016	16.9384	16.6659	16.2723	14.6429	0.374939	0.999904	0.0763655	0.293308	0.999971	0.0904493	0.0224344	0.606007	0.19649	expressed protein
LOC_Os10g27340	94.7501	95.9495	123.319	87.4478	92.8378	125.643	108.53	105.45	148.499	91.3554	100.806	118.596	0.900472	0.999904	0.00828296	0.754309	0.999971	-0.0207272	0.0224383	0.606007	0.151192	oxidoreductase, putative, expressed
LOC_Os02g10000	2.20671	0.511416	1.28047	0.573885	0.542403	0.885343	0.551466	0.0546549	0.529616	1.72589	0.551161	0.838209	0.7021	0.999904	0.194035	0.500777	0.999971	-0.341547	0.0225038	0.607104	-1.15753	zinc-binding protein, putative, expressed
LOC_Os10g36610	6.05367	11.995	15.0031	2.67638	4.05689	20.3819	0	3.14146	13.8208	16.1171	8.55653	15.3713	0.774151	0.999904	-0.216047	0.342385	0.999971	-0.714859	0.0225651	0.608069	-1.71717	UP-9A, putative, expressed
LOC_Os02g06490	0.386757	0.202871	0.222229	0.324736	0.210986	0.409869	0.347303	0.748433	1.21615	0.17212	0.181074	0.322557	0.722678	0.999904	0.1737	0.502658	0.999971	0.328091	0.0225929	0.608069	1.11609	vacuolar protein sorting-associated protein 4, putative, expressed
LOC_Os02g20000	0.0684833	0.159889	0.300246	0.353233	0.122641	0.245837	0.0775848	0.0384465	0	0.188389	0.193855	0.0884446	0.984716	0.999904	0.0126445	0.566554	0.999971	0.378309	0.0226201	0.608069	-1.50482	expressed protein
LOC_Os08g40070	5.79805	3.66622	7.57213	5.69638	5.96073	6.70656	4.92646	2.30206	0.750995	6.79341	4.37665	7.16234	0.83688	0.999904	-0.0908381	0.957876	0.999971	0.0233043	0.0226393	0.608069	-1.00571	expressed protein
LOC_Os02g51300	26.7496	28.4157	37.7808	29.5085	27.5584	31.7546	25.7121	22.7868	26.4873	29.4056	27.5544	32.4957	0.706324	0.999904	0.0284958	0.953358	0.999971	-0.00442337	0.0226977	0.608226	-0.172314	AP2 domain containing protein, expressed
LOC_Os03g60010	0.589249	0.323398	0.284341	0.873582	0.812957	0.138872	0.122334	0.316852	0	0.230457	0.711894	0.321395	0.992367	0.999904	0.00753983	0.787958	0.999971	0.211984	0.0227013	0.608226	-1.79575	transposon protein, putative, CACTA, En/Spm sub-class, expressed
LOC_Os01g20880	4.69159	4.53545	3.60671	4.1952	4.52177	2.98236	3.8756	3.21001	1.95597	4.48125	3.96568	3.38719	0.537926	0.999904	0.0803936	0.886876	0.999971	-0.0185675	0.02272	0.608226	-0.297338	OsWAK3 - OsWAK receptor-like cytoplasmic kinase OsWAK-RLCK, expressed
LOC_Os01g72560	0.369357	0.646758	1.92297	0.71442	0.744129	1.52478	0	0.233276	0.914961	0.381021	0.31366	2.59377	0.845785	0.999904	0.121385	0.626136	0.999971	0.30404	0.022752	0.608416	-1.42141	expressed protein
LOC_Os08g38400	1.82597	3.55449	2.40543	3.00998	3.47908	2.46533	3.8406	4.30475	4.29841	2.12779	4.19448	2.96429	0.228892	0.999904	-0.175695	0.966299	0.999971	-0.00616942	0.0228655	0.610783	0.332296	oligopeptide transporter, putative, expressed
LOC_Os03g27230	55.1359	46.8229	58.2304	55.7829	34.0085	90.7892	80.3705	57.3738	104.728	63.3368	46.1479	60.5942	0.711038	0.999904	-0.0550688	0.96119	0.999971	-0.00723325	0.0229211	0.611598	0.338139	phospho-2-dehydro-3-deoxyheptonate aldolase, chloroplast precursor, putative, expressed
LOC_Os07g37240	2307.72	679.037	457.167	722.78	478.913	395.816	472.559	290.77	511.371	1720.06	669.314	518.039	0.845782	0.999904	0.0606736	0.11756	0.999971	-0.488219	0.0230292	0.612784	-0.709028	chlorophyll A-B binding protein, putative, expressed
LOC_Os08g19530	0.230951	0.545547	0.130576	0.354709	0.1431	0.102403	0.424171	0.0600556	0	0.767493	0.372574	0.12696	0.693527	0.999904	-0.254159	0.345644	0.999971	-0.608236	0.0230614	0.612784	-1.4656	retrotransposon protein, putative, unclassified, expressed
LOC_Os07g09990	0.166627	0.501867	0.576153	0.318689	0.266755	0.248739	0.21922	0.124959	0	0.15772	0.876393	0.818728	0.720144	0.999904	-0.27857	0.484803	0.999971	-0.543196	0.0231065	0.612784	-1.76634	retrotransposon protein, putative, unclassified, expressed
LOC_Os12g32190	2.54659	3.1927	3.83093	1.73535	3.39432	3.59494	3.02638	4.78835	3.27197	1.84416	3.56751	2.49353	0.175685	0.999904	0.212454	0.579704	0.999971	0.0868879	0.0231138	0.612784	0.356382	expressed protein
LOC_Os06g04510	238.23	143.456	117.2	216.78	117.02	103.809	155.9	111.846	106.508	242.45	134	103.051	0.48413	0.999904	0.0593268	0.35783	0.999971	-0.0779669	0.0231237	0.612784	-0.192595	enolase, putative, expressed
LOC_Os02g55720	7.58945	7.04104	7.02918	6.00632	5.44457	8.54107	4.87395	4.36453	5.39941	7.58112	5.37195	12.2124	0.659041	0.999904	-0.0938956	0.372383	0.999971	-0.189822	0.0231621	0.612784	-0.483218	cyclin, N-terminal domain containing protein, expressed
LOC_Os03g22790	25.1395	24.0682	41.1687	28.0869	32.4358	57.735	35.783	43.5902	49.9296	27.6578	22.6794	52.6153	0.460628	0.999904	-0.0941964	0.217784	0.999971	0.157346	0.0231628	0.612784	0.289905	beta-amylase, putative, expressed
LOC_Os06g45570	67.0832	56.6008	50.1077	54.4988	55.052	42.3932	79.4468	62.9498	50.3125	55.4842	54.0725	49.3717	0.296257	0.999904	0.0829715	0.539788	0.999971	-0.0487055	0.0231666	0.612784	0.180376	VQ domain containing protein, putative, expressed
LOC_Os08g44520	139.82	142.941	141.71	136.619	122.285	175.261	152.916	158.031	171.867	118.426	137.124	154.908	0.603821	0.999904	0.039083	0.484507	0.999971	0.0526519	0.0232389	0.612862	0.17093	peptidyl-prolyl cis-trans isomerase, putative, expressed
LOC_Os06g08790	0.18802	0.044895	0.131142	0.850145	0.142846	0.343606	0.58093	0.388632	0.458286	0.344814	0.106445	0.110374	0.385007	0.999904	-0.401004	0.10219	0.999971	0.754423	0.0232422	0.612862	1.04759	ORC1 - Putative origin recognition complex subunit 1, expressed
LOC_Os04g55230	121.052	71.8844	78.4349	76.858	70.3432	62.3524	55.5621	50.1962	61.1212	99.138	61.6814	64.3181	0.13015	0.999904	0.183295	0.683688	0.999971	-0.0493429	0.0232449	0.612862	-0.274836	tetratricopeptide repeat domain containing protein, putative, expressed
LOC_Os03g06330	64.7659	51.3563	51.0025	73.5339	48.194	68.2124	70.9643	58.9585	67.9012	66.0874	51.3422	50.0898	0.989092	0.999904	-0.00105547	0.121754	0.999971	0.119465	0.0233624	0.614485	0.17505	tyrosine protein kinase domain containing protein, putative, expressed
LOC_Os11g01690	1.05362	0.552013	1.15083	0.579951	0.819725	0.756069	0.179495	0.265355	0	0.577441	0.653844	0.753264	0.693107	0.999904	0.27076	0.912613	0.999971	0.0752937	0.0233771	0.614485	-1.55551	expressed protein
LOC_Os12g07360	13.0657	10.3498	6.30792	11.5185	12.4419	5.80695	11.1016	4.45343	1.45057	11.4102	8.62978	4.62027	0.433111	0.999904	0.207081	0.445629	0.999971	0.201492	0.0233821	0.614485	-0.59892	expressed protein
LOC_Os10g39100	45.0298	65.8325	71.9211	39.5323	71.3934	95.3664	58.1352	73.4795	88.4707	43.646	65.0216	71.9775	0.88065	0.999904	0.0138368	0.307763	0.999971	0.0939925	0.0234306	0.615098	0.208857	uncharacterized Cys-rich domain containing protein, putative, expressed
LOC_Os01g34060	39.9287	19.2223	15.2908	27.9208	23.1633	21.8191	20.5567	14.7314	18.9389	38.8872	21.4951	21.548	0.390335	0.999904	-0.143097	0.634188	0.999971	-0.0792672	0.0234879	0.615939	-0.377379	MYB family transcription factor, putative, expressed
LOC_Os03g16920	4.81697	5.91074	11.392	1.02753	4.9584	11.016	3.25523	8.85019	17.2074	2.53521	2.92935	7.5644	0.070013	0.999904	0.582823	0.992791	0.999971	0.00290649	0.0235275	0.616314	0.728521	DnaK family protein, putative, expressed
LOC_Os05g11260	122.898	91.4836	63.3496	55.6191	80.0397	55.9455	53.6889	52.9666	46.3157	83.1644	70.1138	59.6612	0.0915246	0.999904	0.23839	0.439016	0.999971	-0.109327	0.0235644	0.616618	-0.31987	expressed protein
LOC_Os12g16720	24.2114	12.2101	14.8096	16.6777	10.4267	38.1626	20.125	26.0871	38.0583	14.0668	10.8594	19.0002	0.63294	0.999904	0.1365	0.331409	0.999971	0.2776	0.0236853	0.618254	0.646555	cytochrome P450 71A1, putative, expressed
LOC_Os03g02550	24.7989	8.47923	5.50053	18.6191	10.704	5.68896	33.8633	11.4178	5.30281	17.5459	8.22438	5.28734	0.348245	0.999904	0.138124	0.363239	0.999971	0.133885	0.0237107	0.618254	0.333056	OsFBX76 - F-box domain containing protein, expressed
LOC_Os12g02240	2.52792	0	1.35129	2.45154	1.05923	4.03186	7.53847	7.06737	6.72266	4.88126	0.251143	1.35663	0.487817	0.999904	-0.481559	0.505641	0.999971	0.462024	0.0237184	0.618254	1.56983	expressed protein
LOC_Os02g05370	5.35404	11.9462	7.89176	4.58191	8.66408	8.92188	4.86466	6.78781	4.03872	5.95563	8.9466	7.61224	0.654563	0.999904	0.0723983	0.790667	0.999971	-0.0429511	0.0237283	0.618254	-0.36593	retrotransposon protein, putative, Ty3-gypsy subclass, expressed
LOC_Os12g08050	0.622175	1.61765	0.409162	0.618906	0.631379	0.536026	0.422917	1.3608	0	1.19807	2.18386	0.682996	0.495454	0.999904	-0.472674	0.318349	0.999971	-0.69193	0.023803	0.61857	-1.56733	nodulation receptor kinase precursor, putative, expressed
LOC_Os12g07780	73.5279	67.7144	48.3687	64.337	67.6363	56.4148	77.8195	71.5904	56.3147	63.9238	67.1725	47.0478	0.383087	0.999904	0.0581218	0.31467	0.999971	0.067001	0.0238852	0.61857	0.15053	eukaryotic aspartyl protease domain containing protein, expressed
LOC_Os04g59050	1.05639	1.20235	1.73678	1.16759	0.630596	0.682586	0.359034	0.444791	0	1.1624	0.657865	0.613934	0.41569	0.999904	0.490724	0.969351	0.999971	0.0231652	0.0239043	0.61857	-1.36178	expressed protein
LOC_Os04g43680	22.1642	26.7201	28.7533	16.5071	33.0249	37.7306	21.9957	51.3202	43.3989	19.8474	34.3354	27.7021	0.806909	0.999904	-0.0347926	0.829518	0.999971	0.0306507	0.0239064	0.61857	0.321516	MYB family transcription factor, putative, expressed
LOC_Os04g40530	11.4428	5.85614	4.60475	5.92654	4.55374	3.41312	5.44843	2.83958	2.51317	8.92121	6.2278	2.4987	0.153732	0.999904	0.264196	0.467317	0.999971	-0.13462	0.023916	0.61857	-0.418291	methyltransferase domain containing protein, expressed
LOC_Os03g17210	9.75434	8.78052	5.1495	8.62216	7.99476	5.25755	12.1064	9.49879	5.6256	8.89397	7.19678	5.61541	0.443449	0.999904	0.0677417	0.956623	0.999971	0.00480775	0.0239283	0.61857	0.199612	expressed protein
LOC_Os01g31690	2057.27	615.356	381.689	947.311	492.55	394.307	588.817	307.297	449.256	1753.97	565.379	468.456	0.960402	0.999904	0.0126902	0.230189	0.999971	-0.306683	0.0239365	0.61857	-0.577174	oxygen-evolving enhancer protein 1, chloroplast precursor, putative, expressed
LOC_Os09g01134	1.28879	1.30196	0.325981	0.876594	0.473432	0.711756	0.505409	0.417419	0	1.09086	1.01026	0.832222	0.819375	0.999904	-0.152748	0.596414	0.999971	-0.354239	0.023955	0.61857	-1.51033	expressed protein
LOC_Os02g35940	4.39281	3.70355	4.77018	2.38267	3.25351	8.81897	4.35454	4.82949	6.9226	2.08861	2.14153	6.25104	0.166653	0.999904	0.337459	0.221223	0.999971	0.298478	0.0240227	0.61857	0.550647	gibberellin receptor GID1L2, putative, expressed
LOC_Os08g41180	0.66205	0.193213	0.435386	2.82942	0.158081	0.507004	1.05005	0.074335	0	1.57839	0.299849	0.39901	0.570399	0.999904	-0.39189	0.912656	0.999971	0.0757515	0.0240459	0.61857	-1.55826	MBTB31 - Bric-a-Brac, Tramtrack, Broad Complex BTB domain with Meprin and TRAF Homology MATH domain, expressed
LOC_Os04g53350	2.71819	2.27095	1.44096	2.88652	2.09982	1.28825	2.26429	1.73544	1.71895	4.0075	2.36362	2.27148	0.0819456	0.999904	-0.293847	0.0476536	0.999971	-0.334547	0.0240735	0.61857	-0.381088	expressed protein
LOC_Os08g39140	97.6775	152.907	585.225	80.2435	128.501	702.649	105.515	168.404	674.815	85.3797	144.489	572.311	0.376605	0.999904	0.070727	0.893816	0.999971	0.0106772	0.0241418	0.61857	0.180372	heat shock protein, putative, expressed
LOC_Os09g33950	30.6219	31.8938	33.2953	28.3059	28.4588	40.547	32.5103	41.2793	42.6794	28.3032	32.4231	34.0613	0.888943	0.999904	0.0127304	0.854599	0.999971	0.0167062	0.0241545	0.61857	0.205545	ferredoxin 1-like isoform 1, putative, expressed
LOC_Os07g25520	3.45111	10.5753	3.30978	5.72163	7.21034	5.57486	1.46616	3.996	0	3.16453	4.8845	6.12842	0.900969	0.999904	0.0806446	0.65915	0.999971	0.285856	0.0241844	0.61857	-1.46088	expressed protein
LOC_Os10g10580	133.065	62.0488	56.3481	107.26	76.7057	49.0604	82.6137	40.1024	61.4164	139.205	82.7549	65.8153	0.397255	0.999904	-0.162309	0.28031	0.999971	-0.207001	0.0241979	0.61857	-0.432164	expressed protein
LOC_Os03g02820	0.106753	0.141798	0.590397	0.480041	0.114567	0.342551	0	0.340948	0	0.347457	0.328191	0.403425	0.626616	0.999904	-0.514186	0.79257	0.999971	-0.277943	0.0242903	0.61857	-2.38072	expressed protein
LOC_Os03g32636	33.3652	15.1096	51.7025	34.0326	19.9169	40.4748	9.77573	16.4706	16.0944	30.5946	28.0082	34.9181	0.901681	0.999904	-0.0433576	0.941644	0.999971	-0.0256922	0.0243079	0.61857	-0.790458	hypothetical protein
LOC_Os08g14390	7.22464	4.25742	4.06082	4.19735	4.6444	3.79043	2.5971	2.69094	4.21099	5.39319	4.69317	4.45589	0.86407	0.999904	0.0335685	0.480713	0.999971	-0.138269	0.0243542	0.61857	-0.44148	expressed protein
LOC_Os02g36264	0.637267	0.721196	0.701335	0.965078	0.52926	0.413978	0.643914	0.37458	0.633765	1.36708	0.76204	0.797875	0.203071	0.999904	-0.313549	0.0681487	0.999971	-0.449322	0.0243626	0.61857	-0.554592	terpene synthase, putative, expressed
LOC_Os12g01210	7.3862	6.92607	11.3826	4.04465	8.18363	7.37	1.76145	4.4325	5.84201	6.72487	5.76116	6.75549	0.299882	0.999904	0.265824	0.933798	0.999971	-0.0212999	0.0244096	0.61857	-0.577099	HCF152, putative, expressed
LOC_Os11g22640	2.03965	0.892878	0.171967	0.693653	0.421457	0.0563216	0.133311	0.198184	0	0.791272	0.621773	0.303942	0.72284	0.999904	0.257161	0.408778	0.999971	-0.598949	0.024555	0.61857	-1.63022	retrotransposon protein, putative, unclassified, expressed
LOC_Os05g16160	1.39474	0.808724	1.0191	1.02095	0.184578	0.222633	0.261617	0	0	0.709153	1.56883	0.298236	0.666238	0.999904	0.364543	0.488741	0.999971	-0.585133	0.0246167	0.61857	-1.89944	malonyl-CoA isoflavone 7-O-glucoside-6-O-malonyltransferase, putative, expressed
LOC_Os09g25380	0.0541184	0.2606	0.0593167	0.179447	0.371511	0.194271	0	0.227865	0	0.0744366	0.122554	0.401883	0.546473	0.999904	-0.440305	0.599311	0.999971	0.383603	0.0246253	0.61857	-1.64076	kinesin motor protein-related, putative, expressed
LOC_Os03g21140	6.41019	5.37936	4.48956	7.38036	4.78672	2.74639	5.94199	3.98446	2.41685	6.65624	5.04307	4.06657	0.744226	0.999904	0.0414533	0.380105	0.999971	-0.111517	0.0246403	0.61857	-0.285492	RNA-binding zinc finger protein, putative, expressed
LOC_Os01g46570	31.6075	22.1695	14.6358	32.1846	23.7148	29.8243	38.9928	32.1037	27.1702	34.2558	19.3282	19.7062	0.575062	0.999904	-0.0806481	0.192477	0.999971	0.187487	0.024718	0.61857	0.323072	CTP synthase, putative, expressed
LOC_Os09g10290	0.449415	1.00486	0.880303	0.222404	1.19551	0.97666	0.675411	0.74785	2.49533	0.232045	0.52658	0.548495	0.178798	0.999904	0.568333	0.29583	0.999971	0.44192	0.0247216	0.61857	0.949315	retrotransposon protein, putative, Ty1-copia subclass, expressed
LOC_Os03g40670	6.44395	7.0877	6.17562	6.58547	5.16106	9.39232	7.37373	8.28966	10.343	6.68086	6.06804	4.78841	0.483333	0.999904	0.123799	0.342897	0.999971	0.167512	0.0247361	0.61857	0.396591	glycerophosphoryl diester phosphodiesterase family protein, putative, expressed
LOC_Os05g47545	1.0331	0.49705	0.641338	0.674952	0.343511	0.909637	0	0	0.244715	0.815539	0.141387	0.32033	0.47234	0.999904	0.694832	0.56695	0.999971	0.553551	0.0247476	0.61857	-2.17082	expressed protein
LOC_Os08g07390	11.52	10.6392	10.7885	12.4103	9.45907	14.116	11.8945	12.8118	12.4375	9.22621	9.32875	11.378	0.31775	0.999904	0.0995478	0.075317	0.999971	0.17721	0.0247505	0.61857	0.223715	mla1, putative, expressed
LOC_Os01g49320	3.83811	1.35107	3.55624	1.44321	1.53528	5.19863	2.3534	2.79891	7.14949	1.59643	1.27686	3.65374	0.273615	0.999904	0.299437	0.592131	0.999971	0.146536	0.0247551	0.61857	0.614096	glycosyl hydrolase, putative, expressed
LOC_Os03g52460	150.803	73.2095	90.9976	153.017	52.7582	77.4228	99.7227	61.7109	68.5471	150.729	63.8293	86.5528	0.531401	0.999904	0.06212	0.345841	0.999971	-0.0935653	0.0247593	0.61857	-0.222839	glucose-1-phosphate adenylyltransferase large subunit, putative, expressed
LOC_Os05g18604	39.5003	44.2686	32.1776	33.8719	47.1439	52.2465	53.9029	53.3429	66.6605	42.6215	43.721	43.3316	0.352877	0.999904	-0.120795	0.92066	0.999971	0.0129507	0.0247672	0.61857	0.291906	OsSCP28 - Putative Serine Carboxypeptidase homologue, expressed
LOC_Os07g06440	20.219	19.0564	12.9472	16.8973	15.3039	12.1905	19.4456	20.878	16.1415	14.3608	19.7983	11.3807	0.176831	0.999904	0.143679	0.950072	0.999971	-0.00666132	0.0248145	0.61857	0.238753	deoxyribonuclease tatD, putative, expressed
LOC_Os10g21396	12.7721	5.54672	2.27759	6.33007	5.86936	2.0377	6.28733	3.79852	1.24073	9.20187	4.18923	2.88005	0.519283	0.999904	0.124206	0.517788	0.999971	-0.124651	0.0248227	0.61857	-0.43252	NADPH-dependent oxidoreductase, putative, expressed
LOC_Os01g43980	7.65649	5.88943	4.23193	5.58526	6.24845	2.86627	4.27506	4.58696	3.3024	6.1381	5.71551	3.87758	0.300404	0.999904	0.112291	0.355072	0.999971	-0.10028	0.0248294	0.61857	-0.243332	retrotransposon protein, putative, unclassified, expressed
LOC_Os07g25510	3.19511	5.19514	3.00173	1.51349	5.44937	2.62162	0.775659	2.30623	0	2.09271	4.39297	4.12641	0.900692	0.999904	0.0835646	0.801502	0.999971	-0.168354	0.0248301	0.61857	-1.50274	expressed protein
LOC_Os11g12310	0.132377	0.715395	0.952585	0.232554	0.463417	0.244662	0.0815973	0.479558	0	0.500836	0.538357	0.598999	0.830881	0.999904	-0.173117	0.476295	0.999971	-0.577353	0.024845	0.61857	-1.81878	retrotransposon protein, putative, unclassified, expressed
LOC_Os11g09960	13.7805	13.0336	12.0774	9.37833	14.3937	8.8801	9.66598	9.05998	6.12826	9.79157	13.1624	12.0142	0.471874	0.999904	0.111631	0.592776	0.999971	-0.0829852	0.0248549	0.61857	-0.348137	expressed protein
LOC_Os04g41800	12.0063	6.38563	3.93556	4.34072	7.23397	4.83357	6.48315	4.91351	1.96206	8.53991	11.4345	4.34743	0.685615	0.999904	-0.113263	0.226377	0.999971	-0.338476	0.0248686	0.61857	-0.627694	expressed protein
LOC_Os01g27200	2.3113	0.652772	1.55268	1.56573	0.934637	0.85646	2.53401	1.19292	2.25978	0.888769	0.675362	0.818466	0.184885	0.999904	0.507075	0.426745	0.999971	0.303961	0.0248707	0.61857	0.857988	retrotransposon protein, putative, unclassified, expressed
LOC_Os08g06530	257.85	124.597	108.899	137.565	100.26	97.5407	103.606	71.1713	103.161	207.796	123.394	95.2988	0.48769	0.999904	0.119191	0.251718	0.999971	-0.196856	0.0249519	0.61857	-0.385085	rubredoxin family protein, putative, expressed
LOC_Os01g41930	3.14335	3.60874	2.92246	4.20426	2.6868	2.7046	2.82671	2.41012	2.03889	3.94778	2.85977	2.88276	0.963594	0.999904	0.00568856	0.878968	0.999971	-0.0189783	0.0249535	0.61857	-0.279434	leucine rich repeat protein, putative, expressed
LOC_Os12g01449	123.503	113.9	145.571	139.107	83.4032	140.315	113.022	92.7622	122.356	160.651	103.898	141.056	0.596229	0.999904	-0.0469447	0.172292	0.999971	-0.120932	0.0250144	0.61857	-0.198576	chloroplast unusual positioning protein, putative, expressed
LOC_Os04g51280	245.73	188.488	109.265	172.546	169.062	100.66	159.478	134.274	97.1062	201.175	178.387	96.2677	0.0857632	0.999904	0.126805	0.479901	0.999971	-0.0521382	0.0250435	0.61857	-0.16537	DAG protein, chloroplast precursor, putative, expressed
LOC_Os01g56660	0.179622	0.334184	0.0984379	0.0248165	0.134029	0.0805996	0	0.113445	0	0.12353	0.139825	0.115989	0.66362	0.999904	0.34364	0.471511	0.999971	-0.568906	0.0250445	0.61857	-1.77044	expressed protein
LOC_Os02g45880	14.9768	15.1298	10.296	13.2232	9.73372	15.9061	17.4692	17.015	19.0085	14.7895	11.3888	11.7884	0.734631	0.999904	0.0531848	0.937722	0.999971	0.0122592	0.0250892	0.61857	0.351461	expressed protein
LOC_Os03g05780	48.5358	66.9119	75.093	55.4117	75.8556	112.292	66.8421	80.051	107.42	53.5342	71.5623	97.037	0.0342075	0.999904	-0.140936	0.220044	0.999971	0.0816225	0.0251125	0.61857	0.149059	4-coumarate--CoA ligase-like 7, putative, expressed
LOC_Os08g33810	15.4874	13.2015	9.01973	12.6547	13.3335	10.954	14.245	14.9143	12.1552	11.1783	13.0507	9.37369	0.302871	0.999904	0.0991687	0.287494	0.999971	0.102378	0.0251321	0.61857	0.215545	lipoate protein ligase, putative, expressed
LOC_Os03g58764	6.00789	5.87512	7.51431	5.51579	5.19151	12.8531	6.66912	7.07887	13.4141	4.86481	6.03455	8.52558	0.892751	0.999904	0.0188358	0.350413	0.999971	0.130457	0.0251498	0.61857	0.312817	OsFBDUF18 - F-box and DUF domain containing protein, expressed
LOC_Os02g39790	206.825	346.769	544.569	224.602	367.391	824.845	222.194	401.075	809.658	204.661	328.496	626.492	0.754481	0.999904	-0.0255967	0.0477485	0.999971	0.162026	0.025157	0.61857	0.183256	CPuORF9 - conserved peptide uORF-containing transcript, expressed
LOC_Os09g33690	183.293	152.518	163.208	182.744	162.044	249.529	179.155	208.157	261.444	162.831	166.501	177.816	0.860075	0.999904	-0.0187857	0.175419	0.999971	0.1444	0.0251703	0.61857	0.238584	Os9bglu32 - beta-glucosidase homologue, similar to G. max hydroxyisourate hydrolase, expressed
LOC_Os04g58550	49.3581	58.965	52.0046	58.0503	63.9232	57.6239	68.0869	62.8462	60.6878	51.4532	59.9721	53.5746	0.665082	0.999904	-0.0298418	0.202792	0.999971	0.0877962	0.0251767	0.61857	0.15432	acyl-CoA-binding domain-containing protein 6, putative, expressed
LOC_Os07g19560	18.2788	17.7979	19.4743	17.7899	18.3469	20.2749	14.8171	16.3567	15.2326	20.2713	17.4799	19.6928	0.725996	0.999904	-0.0326056	0.866704	0.999971	-0.015616	0.0252246	0.61857	-0.208213	TATA-binding protein-associated factor 2N, putative, expressed
LOC_Os02g32250	43.6784	37.6852	13.9469	30.1682	29.8808	11.3052	31.2503	21.4576	11.0202	35.1777	28.6891	12.2462	0.00597129	0.999904	0.205944	0.406132	0.999971	-0.062226	0.0252787	0.61857	-0.167574	retrotransposon protein, putative, unclassified, expressed
LOC_Os12g13460	87.2404	69.0751	56.5715	76.1344	60.8841	51.538	65.5975	54.0958	44.6606	80.4617	63.7538	48.9159	0.127607	0.999904	0.101701	0.83012	0.999971	-0.0143211	0.0252857	0.61857	-0.149321	SET domain-containing protein, putative, expressed
LOC_Os01g57956	294.729	153.79	137.126	139.393	214.276	117.927	107.337	103.14	80.2174	205.914	138.009	116.215	0.278172	0.999904	0.210244	0.903481	0.999971	0.0235103	0.0252922	0.61857	-0.43368	chloroplast 50S ribosomal protein L14, putative, expressed
LOC_Os04g16740	161.757	51.8372	47.5323	129.334	53.1902	41.7836	99.7662	54.1212	38.1589	136.317	55.537	51.5159	0.941915	0.999904	0.00680261	0.28586	0.999971	-0.0996399	0.0252999	0.61857	-0.20883	ATP synthase subunit alpha, putative, expressed
LOC_Os09g38130	15.4757	31.797	33.2916	21.9984	28.721	48.9857	26.8569	39.7525	44.5779	23.6792	25.1505	30.8598	0.787258	0.999904	-0.0387177	0.220599	0.999971	0.175737	0.0253052	0.61857	0.320892	auxin efflux carrier component, putative, expressed
LOC_Os03g48540	13.6412	15.7123	11.4837	16.7971	15.0268	10.3895	17.8927	15.8696	12.3951	13.3487	16.3363	9.23291	0.433601	0.999904	0.0664758	0.288665	0.999971	0.0900773	0.0253054	0.61857	0.189883	expressed protein
LOC_Os05g10570	56.5594	33.4516	23.528	44.2476	35.3496	21.0618	41.4193	32.29	14.4872	44.8027	36.8224	23.4112	0.642445	0.999904	0.046879	0.614146	0.999971	-0.0509058	0.0253224	0.61857	-0.225816	expressed protein
LOC_Os01g50370	11.2688	8.5866	6.69172	6.64033	5.93196	10.2587	7.83645	13.1813	11.2814	5.98542	4.94563	8.11551	0.164019	0.999904	0.329402	0.459624	0.999971	0.175027	0.0253556	0.61857	0.529233	STE_MEKK_ste11_MAP3K.4 - STE kinases include homologs to sterile 7, sterile 11 and sterile 20 from yeast, expressed
LOC_Os12g11970	0.105406	0.305063	0	0	0	0	0	0.320533	0	0.236545	0.266924	0.317742	0.168565	0.999904	-1.57581	0.000613469	0.999971	-3.92066	0.0253638	0.61857	-2.55894	retrotransposon protein, putative, Ty1-copia subclass, expressed
LOC_Os11g03650	2.33581	2.9145	1.99295	2.30344	3.17273	2.04853	3.82675	3.14482	3.48925	2.59191	3.14475	2.08636	0.579186	0.999904	-0.0755393	0.767227	0.999971	-0.0403191	0.0254017	0.61857	0.304465	mla1, putative, expressed
LOC_Os02g14720	7.44495	5.7331	6.10291	8.06736	5.4283	5.46486	7.37123	6.91917	9.65122	6.78938	4.71073	6.85438	0.641072	0.999904	0.0569551	0.798193	0.999971	0.031237	0.0254045	0.61857	0.273071	expressed protein
LOC_Os02g55100	1.67954	4.20134	8.67837	2.38673	4.29677	6.54588	0	3.43483	0.839095	1.32006	3.39589	3.40856	0.438623	0.999904	0.448705	0.410415	0.999971	0.476885	0.0254568	0.61857	-1.29446	expressed protein
LOC_Os12g03650	0.18866	0.198692	0.186159	0.115663	0.385254	0.231129	0.199187	0	0	0.18935	0.160794	0.122413	0.813741	0.999904	0.197759	0.694794	0.999971	0.329336	0.0255024	0.61857	-1.87492	D-mannose binding lectin family protein, expressed
LOC_Os01g73380	0.280012	0	0.0321811	0.208137	0.0939508	0.0673514	0	0	0	0.0170879	0.161258	0.0427055	0.731721	0.999904	-0.339788	0.477141	0.999971	0.704588	0.0255039	0.61857	-2.21382	retrotransposon protein, putative, Ty1-copia subclass, expressed
LOC_Os02g41650	168.329	136.332	228.649	218.538	125.26	317.698	223.261	183.1	351.485	211.052	147.911	242.398	0.208734	0.999904	-0.122459	0.619036	0.999971	0.0484374	0.025525	0.61857	0.217568	phenylalanine ammonia-lyase, putative, expressed
LOC_Os03g10080	19.3722	14.2788	69.0005	19.5353	12.9524	43.6371	13.4776	15.1682	45.6309	22.6647	17.1129	57.0703	0.695653	0.999904	-0.049744	0.0709588	0.999971	-0.229617	0.0255306	0.61857	-0.283982	expressed protein
LOC_Os07g01070	2.30515	0.825631	0.746488	1.88192	0.797473	0.488971	1.78058	0.992644	1.0993	1.20099	0.370805	0.727348	0.0672157	0.999904	0.485052	0.30738	0.999971	0.270518	0.0255738	0.61857	0.591696	peptide transporter, putative, expressed
LOC_Os05g40000	3.24825	2.21664	2.20448	4.4874	1.88703	1.66062	2.17906	2.25622	1.10587	4.07377	2.04225	2.94691	0.513724	0.999904	-0.144608	0.411743	0.999971	-0.18176	0.0255909	0.61857	-0.494323	expressed protein
LOC_Os10g20090	29.9205	40.0755	33.8181	40.2358	38.9327	40.7202	46.6705	48.1553	40.7759	35.3423	43.9256	36.6248	0.121442	0.999904	-0.113075	0.580219	0.999971	0.0403795	0.0256619	0.61857	0.162908	CSLH1 - cellulose synthase-like family H, expressed
LOC_Os04g21100	0.133323	0.38909	0.121775	0.171918	0.132643	0	0.151042	0.0374238	0	0.163003	0.264177	0.21523	0.874415	0.999904	-0.116792	0.0928288	0.999971	-1.24191	0.0257271	0.61857	-1.64807	retrotransposon protein, putative, unclassified, expressed
LOC_Os07g36080	1204.48	497.129	213.691	507.565	342.434	208.783	397.996	235.766	243.976	881.37	423.553	275.486	0.745244	0.999904	0.0723995	0.121379	0.999971	-0.345157	0.0257409	0.61857	-0.49692	oxygen evolving enhancer protein 3 domain containing protein, expressed
LOC_Os07g16400	0.093766	0.0155238	0	0.0756487	0.0314593	0.0430956	0.0292446	0	0	0.0411278	0.033485	0.0593737	0.265128	0.999904	-0.905035	0.927438	0.999971	0.0739628	0.0257425	0.61857	-1.81118	retrotransposon protein, putative, Ty3-gypsy subclass, expressed
LOC_Os11g11210	56.9426	32.8575	39.3703	46.2418	32.163	31.2669	26.992	21.2437	30.6787	47.7876	35.4992	27.0831	0.268409	0.999904	0.15682	0.965859	0.999971	0.00606491	0.0257654	0.61857	-0.315943	OsClp12 - Putative Clp protease homologue, expressed
LOC_Os08g18720	0	1.13083	0.109139	0.0165193	0	0.263239	0	0.0777869	0	0.289765	0.637125	0.545781	0.31153	0.999904	-1.11923	0.0760245	0.999971	-1.96219	0.0258321	0.61857	-2.46483	retrotransposon protein, putative, unclassified
LOC_Os10g35080	0.963756	1.49701	1.41351	0.528937	0.680452	2.55365	0.901539	0.817861	2.65764	0.149321	0.371279	1.24313	0.0250506	0.999904	1.04386	0.0875003	0.999971	0.796067	0.0258651	0.61857	1.03809	expressed protein
LOC_Os01g73540	57.3468	28.9119	9.02752	22.2056	24.8128	7.23963	22.7607	19.2519	5.65316	35.08	23.9247	8.30091	0.0957159	0.999904	0.254161	0.22915	0.999971	-0.18346	0.0258678	0.61857	-0.33993	YGGT family protein, putative, expressed
LOC_Os08g37104	4.80082	5.48753	3.54451	5.7484	6.46792	5.67274	8.72482	8.05746	6.45147	5.93069	5.11497	5.76958	0.145881	0.999904	-0.209179	0.656044	0.999971	0.0640643	0.0258716	0.61857	0.320498	expressed protein
LOC_Os01g09300	54.6983	59.0737	57.7169	57.5159	67.3992	65.8125	65.3198	92.8013	58.845	55.9721	53.8467	59.8657	0.918666	0.999904	0.0105874	0.257134	0.999971	0.117491	0.0259043	0.61857	0.230966	oxidoreductase, putative, expressed
LOC_Os10g20470	36.8541	35.5631	46.9534	26.4853	42.0791	45.8294	36.4836	46.8673	46.4791	25.2882	32.6943	46.5497	0.15694	0.999904	0.155969	0.381876	0.999971	0.0963561	0.0259097	0.61857	0.245458	MATE efflux family protein, putative, expressed
LOC_Os02g54080	64.3383	55.2339	57.7922	66.925	61.2939	47.9575	55.8362	48.1688	39.1748	68.7195	51.3711	48.6771	0.409335	0.999904	0.0589707	0.509715	0.999971	0.0471215	0.0259492	0.61857	-0.159171	expressed protein
LOC_Os06g38294	19.6524	17.7538	10.2617	21.4828	16.1095	11.8636	32.8464	19.0198	12.5234	21.225	15.6935	12.2585	0.655293	0.999904	-0.0442042	0.968713	0.999971	0.00388371	0.0259625	0.61857	0.220493	peptide transporter PTR2, putative, expressed
LOC_Os10g37180	422.539	115.953	72.6472	110.294	85.2854	59.9672	82.0769	36.7448	62.5277	298.256	91.3777	62.06	0.448561	0.999904	0.247523	0.265205	0.999971	-0.363919	0.025986	0.61857	-0.727209	glycine cleavage system H protein, putative, expressed
LOC_Os01g08660	47.0233	62.5334	59.6885	45.3193	59.1892	67.4549	58.5948	57.4194	70.5542	45.335	57.0905	56.7535	0.423357	0.999904	0.058894	0.330886	0.999971	0.0715259	0.0260026	0.61857	0.16376	aquaporin protein, putative, expressed
LOC_Os03g15120	21.8806	16.7781	15.7862	23.812	15.5731	15.7264	23.9441	21.4426	21.2464	23.7236	18.1591	14.8899	0.673031	0.999904	-0.0342584	0.714645	0.999971	-0.0296823	0.0260166	0.61857	0.180709	imidazole glycerol phosphate synthase hisHF, chloroplast precursor, putative, expressed
LOC_Os06g11200	0.447382	0.395885	0.455037	0.736944	0.248317	0.349176	0.058071	0.321408	0	0.565454	0.488361	0.111635	0.669611	0.999904	0.292966	0.744093	0.999971	0.224137	0.0260413	0.61857	-1.52813	12-oxophytodienoate reductase, putative, expressed
LOC_Os10g36760	70.7661	66.6531	66.3884	68.0951	75.7748	77.4844	80.0204	79.3884	80.1565	69.1212	72.3985	65.9938	0.784962	0.999904	-0.0181644	0.323278	0.999971	0.0657548	0.0260584	0.61857	0.148143	OsProCP3 - Putative Lysosomal Pro-x Carboxypeptidase homologue, expressed
LOC_Os12g38270	1691.03	2029.03	2541.74	1075.79	1811.89	3385.94	1859.1	2631.49	3679.21	1519.8	1842.34	2713.24	0.727866	0.999904	0.0455622	0.731984	0.999971	-0.0448449	0.0260744	0.61857	0.291352	metallothionein, putative, expressed
LOC_Os02g04760	1.82321	2.18747	1.92433	1.34343	1.57205	1.93922	0.459005	1.36474	0.0787176	0.804948	1.835	4.09882	0.91205	0.999904	0.0736563	0.845934	0.999971	-0.129576	0.0260771	0.61857	-1.4838	cycloartenol synthase, putative, expressed
LOC_Os06g07030	57.037	37.5344	46.5431	57.9846	38.4374	59.0763	58.6277	57.5057	60.3661	52.0831	34.689	57.1175	0.906781	0.999904	-0.0121126	0.420942	0.999971	0.0832452	0.0260893	0.61857	0.230136	AP2 domain containing protein, expressed
LOC_Os01g09700	0.263633	0.13849	0.0866869	0.0582774	0.17311	0.0567824	0.80641	0.288607	0.522453	0.241741	0.268655	0.0170238	0.713829	0.999904	0.229356	0.658677	0.999971	-0.276277	0.0261303	0.61857	1.39112	aminotransferase, classes I and II, domain containing protein, expressed
LOC_Os04g44550	25.4167	24.9209	35.87	19.6548	28.6235	37.9174	20.7817	29.685	40.9026	18.9913	25.7693	25.0607	0.0619311	0.999904	0.204825	0.0894457	0.999971	0.186341	0.0261391	0.61857	0.244033	CHCH domain containing protein, expressed
LOC_Os06g01460	43.6992	33.064	29.8248	32.1098	38.4952	23.0415	27.4766	23.6103	23.9055	40.7765	31.2994	25.987	0.439064	0.999904	0.0868153	0.664223	0.999971	-0.0487036	0.0261682	0.61857	-0.249493	expressed protein
LOC_Os03g15550	0.335007	0.189786	0.107996	0.239589	0.270558	0.113184	0.133952	0.0331893	0	0.144559	0.167347	0.114526	0.639767	0.999904	0.290473	0.614345	0.999971	0.312726	0.0261754	0.61857	-1.38005	phosphatidylinositol-4-phosphate 5-kinase, putative, expressed
LOC_Os07g42000	0.967652	2.3341	0.801391	1.3122	1.33053	0.888789	3.28466	1.78614	1.41922	1.03697	1.35493	0.993776	0.747613	0.999904	0.0860734	0.890161	0.999971	0.0369399	0.0262337	0.618703	0.594548	expressed protein
LOC_Os01g55500	0.41341	0.100541	0.276907	1.34541	0.20565	0.346274	0.156118	0.27077	0	0.947703	0.286057	0.385602	0.388692	0.999904	-0.707892	0.977894	0.999971	-0.0227557	0.026258	0.618703	-1.82508	nucleobase-ascorbate transporter, putative, expressed
LOC_Os03g57070	25.2491	35.8325	35.0817	22.956	35.5006	25.0023	21.037	28.6615	21.0934	25.0448	30.6082	28.3168	0.107799	0.999904	0.126175	0.808311	0.999971	-0.0190347	0.0263121	0.618703	-0.174303	amine oxidase-related, putative, expressed
LOC_Os03g07190	282.519	309.2	312.818	292.895	291.079	363.068	341.635	348.313	355.948	265.086	297.923	341.698	0.956928	0.999904	0.00374639	0.490977	0.999971	0.0477763	0.0263228	0.618703	0.154091	expressed protein
LOC_Os11g23880	41.8048	27.8283	23.3484	37.6538	31.0354	19.4721	33.4936	26.2223	16.4252	38.7049	29.7397	21.8276	0.753946	0.999904	0.0255437	0.704078	0.999971	-0.0309535	0.026346	0.618703	-0.181006	expressed protein
LOC_Os08g44680	1377.32	612.357	429.403	800.851	439.398	439.143	594.138	348.268	474.162	1134.25	568.747	471.242	0.730298	0.999904	0.0579238	0.183505	0.999971	-0.223483	0.0263774	0.618703	-0.373123	photosystem I reaction center subunit II, chloroplast precursor, putative, expressed
LOC_Os02g29530	30.0636	30.42	28.0608	30.9648	30.2886	27.3959	31.0758	36.7122	33.7102	33.0448	26.8071	26.829	0.733806	0.999904	0.025148	0.704562	0.999971	0.0280396	0.0263802	0.618703	0.164211	glycosyl transferase 8 domain containing protein, putative, expressed
ChrSy.fgenesh.gene.82	42.01	19.8619	23.7575	42.0545	19.8393	44.2782	45.2249	18.3121	38.9446	58.3277	30.8894	45.3118	0.000605434	0.492178	-0.471934	0.0568651	0.999971	-0.262083	0.0264183	0.618703	-0.305525	expressed protein
LOC_Os02g13360	6.82076	7.62991	8.30496	6.65879	8.17546	6.59103	6.26852	6.88576	5.13135	7.20967	7.17554	8.43172	0.972088	0.999904	-0.00349721	0.52847	0.999971	-0.0630037	0.0264185	0.618703	-0.221893	expressed protein
LOC_Os05g35340	0.762188	1.33462	1.29107	1.53168	0.454978	0.54721	0.353243	0.641839	0.161546	1.01658	0.902233	1.20806	0.907716	0.999904	0.0553898	0.481463	0.999971	-0.336369	0.0264348	0.618703	-1.06067	expressed protein
LOC_Os02g03430	11.0436	7.89854	6.30792	5.58734	4.64249	10.4972	13.7448	12.5089	12.8739	8.8429	7.35293	7.6837	0.887735	0.999904	0.0316991	0.375483	0.999971	-0.199002	0.0264865	0.618703	0.498264	expressed protein
LOC_Os03g41320	2.40563	2.10618	2.6367	3.54517	3.35069	7.48416	0	4.72682	0	5.88231	2.72383	6.21363	0.441777	0.999904	-0.608328	0.965932	0.999971	-0.0337786	0.0265046	0.618703	-1.75472	expressed protein
LOC_Os09g33720	0.410336	0.487564	0.449751	0.323952	0.174961	0.336685	0.0498075	0.320862	0.0341672	0.376262	0.530986	0.208191	0.670488	0.999904	0.24583	0.668235	0.999971	-0.247617	0.0265108	0.618703	-1.28187	protein transport protein Sec61, putative, expressed
LOC_Os10g05200	1.78508	1.44265	1.24166	0.986502	2.00821	1.01049	1.22506	1.12741	0.760337	1.92015	2.13781	1.44087	0.425043	0.999904	-0.203539	0.164191	0.999971	-0.354952	0.0266294	0.619856	-0.565659	OsFBX367 - F-box domain containing protein, expressed
LOC_Os12g02530	44.7534	35.6552	50.534	53.9786	35.3073	47.8836	19.1771	28.1099	41.8741	56.8561	25.7626	77.2773	0.637237	0.999904	-0.113476	0.771913	0.999971	-0.0697541	0.0266313	0.619856	-0.533463	BTBN22 - Bric-a-Brac, Tramtrack, Broad Complex BTB domain with non-phototropic hypocotyl 3 NPH3 and coiled-coil domains, expressed
LOC_Os10g41780	100.947	51.1639	97.1996	73.9218	37.0044	92.2106	38.6326	36.7828	90.5844	125.243	45.8098	94.2183	0.90669	0.999904	-0.0250902	0.239079	0.999971	-0.252004	0.0266627	0.619856	-0.474434	chlorophyllide a oxygenase, chloroplast precursor, putative, expressed
LOC_Os03g55120	1.66428	1.45711	3.01926	2.60065	1.47307	1.19486	0.975239	1.44982	1.0035	2.57854	2.01438	2.22349	0.626943	0.999904	-0.149942	0.328062	0.999971	-0.301723	0.0266978	0.619856	-0.683612	plastocyanin-like domain containing protein, putative, expressed
LOC_Os03g11700	0.868214	1.27842	0.908355	0.828757	1.01298	0.481665	0.804764	1.42901	1.70217	0.578995	0.71495	0.509672	0.123052	0.999904	0.509191	0.516667	0.999971	0.214129	0.0267095	0.619856	0.731628	pentatricopeptide repeat domain containing protein, putative, expressed
LOC_Os06g43370	1.42146	0.248903	0.0346222	0.593527	0.565681	0.136071	0.322075	0.372404	0	0.695159	0.661676	0.122386	0.430305	0.999904	-0.423437	0.898	0.999971	-0.0688242	0.0267171	0.619856	-1.18957	cytochrome P450, putative, expressed
LOC_Os03g55540	23.343	46.3657	77.0743	24.3772	39.9434	72.2249	31.8332	47.429	70.4985	24.6039	38.094	68.5816	0.265253	0.999904	0.0864217	0.679863	0.999971	0.0320107	0.0267381	0.619856	0.17185	ZOS3-18 - C2H2 zinc finger protein, expressed
LOC_Os02g47150	0.894712	0.752315	0.582566	1.06723	0.518223	0.737755	0.797849	0.410288	0.330453	1.47025	0.581757	0.469064	0.964978	0.999904	-0.00853014	0.970176	0.999971	0.00726341	0.0267857	0.620369	-0.43025	DNA topoisomerase 2, putative, expressed
LOC_Os08g01380	476.163	182.751	329.298	223.332	178.988	274.737	93.4629	111.396	280.699	393.895	172.856	301.782	0.705209	0.999904	0.110424	0.478767	0.999971	-0.206748	0.0268518	0.620606	-0.646165	2Fe-2S iron-sulfur cluster binding domain containing protein, expressed
LOC_Os07g46240	6.81226	6.99197	11.7628	6.27837	7.40727	10.6846	4.27437	7.83709	9.28516	7.38057	8.38975	10.7334	0.610452	0.999904	-0.0572808	0.399294	0.999971	-0.0947747	0.0268565	0.620606	-0.2489	choline transporter-related, putative, expressed
LOC_Os01g40630	239.834	136.861	298.2	219.545	134.581	275.059	132.887	130.199	282.465	251.608	140.83	317.518	0.705173	0.999904	-0.0468573	0.390462	0.999971	-0.106358	0.0268864	0.620606	-0.274095	uncharacterized protein PA4923, putative, expressed
LOC_Os02g22380	38.2344	37.6454	37.1241	33.8676	37.8993	50.907	39.4134	51.5128	60.4839	34.4292	39.844	49.1002	0.399886	0.999904	-0.0775967	0.930297	0.999971	-0.00806281	0.0268977	0.620606	0.203987	glycosyltransferase protein, putative, expressed
ChrUn.fgenesh.gene.8	0.276056	0.102408	0.795109	0.333067	0.266427	0.324023	0.233892	0.19755	0.109556	0.598528	0.556356	0.563919	0.195206	0.999904	-0.679584	0.245515	0.999971	-0.609271	0.026948	0.620848	-1.16065	expressed protein
LOC_Os09g35880	82.324	64.1416	106.663	81.717	61.2701	96.454	64.0379	55.0644	87.8888	83.7373	58.168	101.528	0.532015	0.999904	0.0429162	0.932002	0.999971	-0.00585962	0.0269712	0.620848	-0.151901	B-box zinc finger family protein, putative, expressed
LOC_Os08g36680	0.118392	0.310963	0.778577	0.976298	1.37093	1.14748	0.301783	0.149546	0.966086	1.24194	0.96681	1.74919	0.0144195	0.999904	-1.34731	0.855219	0.999971	-0.100478	0.0269845	0.620848	-1.21795	bifunctional monodehydroascorbate reductase and carbonic anhydrasenectarin-3 precursor, putative, expressed
LOC_Os11g09010	31.9532	32.7992	34.3479	39.4376	30.3664	31.4819	42.299	35.2016	37.4743	36.6862	30.1273	32.1156	0.951558	0.999904	0.00424715	0.751426	0.999971	0.0221451	0.0270428	0.621603	0.154567	lipase, putative, expressed
LOC_Os02g05470	70.1573	27.1275	15.5612	41.9261	40.0537	15.5854	28.1652	22.0486	12.5084	60.6554	27.9925	16.0469	0.883943	0.999904	0.0273719	0.951721	0.999971	-0.0113532	0.0271301	0.622026	-0.414339	CCT motif family protein, expressed
LOC_Os01g01280	27.6707	13.7282	10.0614	17.1851	13.5288	9.86999	16.6444	10.4672	7.21933	20.4997	17.3314	8.22497	0.477821	0.999904	0.0889146	0.530883	0.999971	-0.0784986	0.0271497	0.622026	-0.276756	expressed protein
LOC_Os04g52730	109.23	121.328	135.941	99.3855	142.847	147.228	129.67	159.563	161.344	106.333	139.609	145.894	0.356517	0.999904	-0.0618047	0.883829	0.999971	-0.00979443	0.0272125	0.622026	0.148037	NAD dependent epimerase/dehydratase family domain containing protein, expressed
LOC_Os10g31950	72.5697	64.8149	85.2087	72.588	63.8574	108.465	75.5959	87.1401	126.546	77.6744	69.102	89.1767	0.485537	0.999904	-0.0596055	0.829212	0.999971	0.0184359	0.0272185	0.622026	0.188739	3-ketoacyl-CoA thiolase, peroxisomal precursor, putative, expressed
LOC_Os12g37360	26.7905	32.5536	39.7845	31.7342	24.1474	42.8742	33.6735	32.8179	51.1343	29.816	27.2886	39.064	0.745162	0.999904	0.028778	0.882423	0.999971	0.013095	0.0272394	0.622026	0.195504	miro, putative, expressed
LOC_Os05g49370	4.55962	5.0851	8.26982	6.05955	3.36986	2.26032	6.54924	2.74261	2.7842	10.3032	6.51488	5.64328	0.45381	0.999904	-0.226493	0.0213783	0.999971	-0.695809	0.0272668	0.622026	-0.66752	DUF1645 domain containing protein, putative, expressed
LOC_Os04g41250	0.049388	0.0288268	0.018044	0.145566	0.0196543	0.224567	0	0	0.230292	0.226434	0.149122	0.148828	0.0887048	0.999904	-1.56605	0.518897	0.999971	-0.593429	0.0272997	0.622026	-2.03058	armadillo/beta-catenin repeat family protein, putative, expressed
LOC_Os01g50860	24.6042	19.5181	17.826	22.4891	20.9416	16.4919	19.4882	16.5783	13.1661	22.1946	20.3333	15.7644	0.41991	0.999904	0.0612261	0.680139	0.999971	0.031295	0.0273095	0.622026	-0.167535	chloride transporter, chloride channel family, putative, expressed
LOC_Os09g19150	16.1676	15.4366	9.1647	11.5755	15.5331	10.5844	11.9834	10.8272	8.39464	14.7129	14.3701	10.1524	0.836699	0.999904	0.0207399	0.705477	0.999971	-0.0380286	0.0273129	0.622026	-0.222073	transposon protein, putative, unclassified, expressed
LOC_Os04g16844	46.1181	2.44826	0.0183604	11.696	12.459	9.10581	28.8378	26.7074	21.9676	24.5812	0.841856	0.0491721	0.733937	0.999904	0.449377	0.117275	0.999971	2.07084	0.0273418	0.622026	2.91737	cytochrome b6-f complex subunit 4, putative, expressed
LOC_Os10g21326	46.1181	2.44826	0.0183604	11.696	12.459	9.10581	28.8378	26.7074	21.9676	24.5812	0.841856	0.0491721	0.733937	0.999904	0.449377	0.117275	0.999971	2.07084	0.0273418	0.622026	2.91737	cytochrome b6-f complex subunit 4, putative, expressed
LOC_Os06g45240	1.49715	0.613109	0.846946	1.20103	0.706314	0.62412	1.43623	0.732048	1.80157	0.531417	0.697212	0.779651	0.249381	0.999904	0.325588	0.476367	0.999971	0.201302	0.0273731	0.622054	0.623602	inactive receptor kinase At2g26730 precursor, putative, expressed
LOC_Os06g01210	2134.73	879.902	838.403	932.403	693.072	786.797	576.75	465.662	825.891	1721.01	904.414	756.927	0.700835	0.999904	0.096294	0.267262	0.999971	-0.278057	0.0274206	0.622054	-0.55278	plastocyanin, chloroplast precursor, putative, expressed
LOC_Os07g18990	55.5063	73.8796	34.8856	53.7392	61.6959	40.0019	62.326	61.5336	55.2862	41.6197	63.6837	35.8879	0.269817	0.999904	0.135524	0.358536	0.999971	0.112764	0.0274349	0.622054	0.270841	LTPL40 - Protease inhibitor/seed storage/LTP family protein precursor, expressed
LOC_Os09g27500	2.13629	2.04235	0.322964	0.542801	1.56839	0.158663	0.959737	1.09592	0.68699	0.697997	0.417046	0.158562	0.00600489	0.999904	1.11765	0.382776	0.999971	0.355038	0.0274451	0.622054	0.897012	cytochrome P450, putative, expressed
LOC_Os08g43950	3.04667	2.22285	1.85518	1.96432	1.26297	0.972155	1.43816	1.42533	0.493277	2.09526	2.68307	2.07665	0.946681	0.999904	0.0238555	0.151636	0.999971	-0.51145	0.0274764	0.622185	-0.786443	carrier, putative, expressed
LOC_Os04g25400	136.828	147.268	143.827	129.833	146.298	133.434	115.289	109.847	122.987	131.773	132.476	140.762	0.416815	0.999904	0.0545771	0.854001	0.999971	0.0123689	0.0275323	0.622559	-0.148137	uncharacterized protein all1601, putative, expressed
LOC_Os12g44160	7.17909	4.31961	4.98621	9.92562	4.94124	3.16272	6.42083	4.66632	3.04453	7.93096	6.53332	5.52153	0.229547	0.999904	-0.204785	0.238411	0.999971	-0.20094	0.0275439	0.622559	-0.375596	oxidoreductase, putative, expressed
LOC_Os01g46810	25.9761	32.9205	31.0644	27.0319	33.8193	30.8191	32.4616	33.4594	31.6431	25.1493	28.9325	30.9133	0.403596	0.999904	0.0550096	0.241699	0.999971	0.0771089	0.0275719	0.622614	0.145117	viral A-type inclusion protein repeat containing protein, expressed
LOC_Os10g15300	81.9024	50.7081	32.3379	43.2289	37.2171	31.0152	43.1901	26.4519	32.3284	63.2301	45.365	34.0117	0.464995	0.999904	0.106066	0.127413	0.999971	-0.22129	0.0276421	0.623623	-0.319705	expressed protein
LOC_Os03g17634	23.4118	18.2058	16.937	23.2941	17.8642	15.312	18.4345	15.0781	13.8098	23.1478	18.3364	14.4105	0.425615	0.999904	0.0547981	0.81971	0.999971	0.0156762	0.027683	0.623778	-0.151436	PPR repeat domain containing protein, putative, expressed
LOC_Os11g31705	1.12976	0.579001	0.573835	0.639574	1.08561	1.31436	0.280955	0.440879	0.54607	1.03594	0.795597	0.836289	0.560306	0.999904	-0.199236	0.78148	0.999971	0.094896	0.0277064	0.623778	-0.75311	expressed protein
LOC_Os10g14194	3.32916	2.91355	2.63777	2.44174	3.77572	3.08826	3.35541	3.96657	2.40067	1.47192	1.40621	2.68555	0.0567114	0.999904	0.501797	0.0404279	0.999971	0.53967	0.0277427	0.623778	0.579581	POEI28 - Pollen Ole e I allergen and extensin family protein precursor, expressed
LOC_Os05g07560	1.96413	1.85298	2.35145	2.62332	1.91328	1.60364	2.07813	1.51511	1.23904	2.6283	1.99302	1.91815	0.703061	0.999904	-0.053807	0.611539	0.999971	-0.0716894	0.0277559	0.623778	-0.310642	expressed protein
LOC_Os02g57305	0.22464	0.826042	0.344704	0.446919	0.0536383	0.0645118	0.152697	0.151335	0	0.453169	0.305224	0.435176	0.972827	0.999904	0.0245873	0.142363	0.999971	-1.05896	0.0277843	0.623778	-1.58826	disease resistance protein, putative, expressed
LOC_Os07g43560	254.926	182.08	75.2852	246.75	167.946	42.3819	229.37	109.666	49.1661	243.972	186.612	68.7141	0.792923	0.999904	0.0364527	0.170418	0.999971	-0.190356	0.0278025	0.623778	-0.305497	TKL_IRAK_DUF26-lc.24 - DUF26 kinases have homology to DUF26 containing loci, expressed
LOC_Os01g55280	1.54915	0.319133	1.19856	1.15828	0.543968	0.817801	0.929136	0.383689	0.106229	1.12805	1.13498	0.970925	0.636429	0.999904	-0.235633	0.568698	0.999971	-0.284122	0.0278763	0.624665	-1.09618	expressed protein
LOC_Os01g53390	5.18094	10.223	6.6674	7.23628	10.8321	9.69697	5.78188	6.68539	6.03957	8.3433	9.64573	6.79093	0.251192	0.999904	-0.145733	0.378428	0.999971	0.111866	0.0278948	0.624665	-0.279254	glucosyltransferase, putative, expressed
LOC_Os12g14126	0.262065	0.39846	0.299346	0.238787	0.359879	0.196285	0.115937	0.469189	0.106042	0.500472	0.309534	0.397271	0.521619	0.999904	-0.223026	0.225005	0.999971	-0.422256	0.0279414	0.624665	-0.764974	retrotransposon protein, putative, Ty1-copia subclass, expressed
LOC_Os07g05390	13.8392	11.1359	10.9475	11.1792	11.5033	8.76816	10.038	9.89682	8.58503	12.3804	12.1953	10.0065	0.668704	0.999904	0.0363414	0.26121	0.999971	-0.0954155	0.0279636	0.624665	-0.186646	expressed protein
LOC_Os07g48130	14.9835	8.65696	6.42092	15.569	7.64664	7.49915	13.9631	9.65885	8.44955	13.4843	8.11062	5.79229	0.317438	0.999904	0.0907073	0.199825	0.999971	0.116322	0.0279915	0.624665	0.199373	potassium transporter, putative, expressed
LOC_Os05g34460	19.1416	15.8116	16.6474	18.4891	14.0345	15.9385	18.5624	19.6409	23.1871	17.6857	15.5838	18.1511	0.980874	0.999904	0.0019493	0.450653	0.999971	-0.0613362	0.028044	0.624665	0.178617	OsDegp7 - Putative Deg protease homologue, expressed
LOC_Os08g41630	2.94244	1.26232	0.161254	2.17672	1.37003	0.295753	1.92509	0.532734	0.171505	2.1315	1.17278	0.437011	0.476574	0.999904	-0.192854	0.803972	0.999971	-0.0672475	0.0280514	0.624665	-0.595115	ubiquitin carboxyl-terminal hydrolase family protein, expressed
LOC_Os07g10060	3.68472	2.49042	2.76174	3.38554	3.15775	2.33274	3.5639	1.92841	1.51334	4.10459	2.36741	2.9934	0.763476	0.999904	-0.0462718	0.749276	0.999971	-0.0491434	0.0280607	0.624665	-0.337742	retrotransposon protein, putative, unclassified, expressed
LOC_Os04g12060	0.387467	0.141348	0.495466	0.392569	0.0770979	0.115909	0.0548703	0.299096	0	0.444115	0.402159	0.312753	0.779992	0.999904	-0.224349	0.289928	0.999971	-0.849981	0.0281167	0.624665	-1.76349	retrotransposon protein, putative, unclassified, expressed
LOC_Os01g23850	0.586853	0.336216	0.701698	0.65861	0.398085	1.35179	0.951939	0.684248	1.39932	0.510412	0.453053	0.452931	0.777983	0.999904	0.0915247	0.215455	0.999971	0.402102	0.0281228	0.624665	0.712714	transposon protein, putative, CACTA, En/Spm sub-class, expressed
LOC_Os06g36090	37.4095	20.6976	19.7714	36.9547	17.3969	16.6511	31.7303	19.4202	15.023	37.407	20.6463	18.8933	0.817316	0.999904	0.0155556	0.133009	0.999971	-0.101169	0.0281602	0.624665	-0.147816	ABC-2 type transporter, putative, expressed
LOC_Os03g61040	0.725037	0.680126	1.73127	0.515162	0.556459	1.3943	0.880066	1.61361	3.3506	0.546111	0.689004	2.17371	0.962083	0.999904	0.0126556	0.379491	0.999971	-0.233955	0.0281693	0.624665	0.58431	GIL1, putative, expressed
LOC_Os11g13420	83.0037	50.6102	30.2944	56.4483	56.2586	33.3029	48.5397	34.444	30.1074	71.4154	56.6809	30.0235	0.910039	0.999904	0.0149229	0.737424	0.999971	-0.04428	0.0281933	0.624665	-0.289848	RNA binding protein, putative, expressed
LOC_Os05g31160	9.99811	7.96459	6.60423	6.865	8.88224	3.91358	5.15882	5.47126	3.95733	7.0573	6.92939	5.78033	0.137897	0.999904	0.206094	0.696759	0.999971	-0.0541326	0.0282006	0.624665	-0.304833	peptide chain release factor 2, putative, expressed
LOC_Os02g53850	0.476489	0	0.198956	0.777437	0.216712	0.130322	0	0.0191072	0.264504	1.37318	0.141302	0.65933	0.147716	0.999904	-1.63795	0.613385	0.999971	-0.571666	0.0282898	0.625865	-2.48156	OsSub21 - Putative Subtilisin homologue, expressed
LOC_Os04g54300	8.92347	7.72683	5.05152	6.28623	5.7365	4.70163	13.9976	7.50448	8.57337	5.2152	6.55082	7.1553	0.556547	0.999904	0.11693	0.549438	0.999971	-0.119042	0.0283061	0.625865	0.436119	wound induced protein, putative, expressed
LOC_Os08g05790	12.7987	10.4835	5.87481	7.46561	9.32182	7.07932	8.04927	5.87036	4.59357	10.5711	8.58173	6.06102	0.391106	0.999904	0.119474	0.80429	0.999971	-0.0345207	0.0283795	0.626539	-0.305367	caffeoyl-CoA O-methyltransferase, putative, expressed
LOC_Os12g41962	18.1054	21.6315	19.5206	18.7426	19.9337	20.3158	16.35	16.8215	11.7276	15.6396	21.1188	20.4558	0.71268	0.999904	0.0407396	0.712175	0.999971	0.0408146	0.0283879	0.626539	-0.242483	nucleolar protein NOP5, putative, expressed
LOC_Os07g10460	61.3228	69.693	65.182	73.2715	69.5663	77.2581	80.0176	73.7359	80.9125	67.5463	73.7739	61.3287	0.652897	0.999904	-0.0313019	0.213721	0.999971	0.08654	0.0284774	0.626827	0.152468	5-nucleotidase surE, putative, expressed
LOC_Os03g16874	59.6585	66.0996	50.3117	55.7405	53.2663	54.3399	73.8299	73.2369	61.3255	57.1564	61.6801	51.0879	0.736736	0.999904	0.0317869	0.714436	0.999971	-0.0345975	0.0284913	0.626827	0.207115	expressed protein
LOC_Os02g53160	7.06756	6.8551	8.65778	4.67163	8.35505	10.2975	7.06486	10.1527	13.166	5.20995	5.8449	9.93297	0.535775	0.999904	0.10793	0.579964	0.999971	0.0964652	0.0284914	0.626827	0.3818	tyrosine phosphatase family protein, putative, expressed
LOC_Os02g56310	2.60622	6.35393	8.13021	3.1908	5.79218	8.98141	3.61124	8.23856	9.95578	2.57363	5.40252	7.53438	0.602722	0.999904	0.0829482	0.33131	0.999971	0.15482	0.0285143	0.626827	0.349032	calcium-dependent protein kinase isoform AK1, putative, expressed
LOC_Os04g53195	74.5381	75.4175	76.0049	73.1134	68.5474	82.995	96.2682	71.7844	96.2611	75.1827	61.8184	83.8022	0.714767	0.999904	0.0304142	0.773441	0.999971	0.0239574	0.0285519	0.626827	0.182223	expressed protein
LOC_Os02g32440	0.87624	0.275817	0.157203	1.03042	0.353612	0.374923	0.365598	0.526078	0	0.891422	1.04987	0.555696	0.231644	0.999904	-0.80276	0.53362	0.999971	-0.41777	0.0285552	0.626827	-1.46948	expressed protein
LOC_Os04g46060	0.13669	0.199458	0.549338	0.352519	0.163191	0.392544	0.38714	0	0	0.250678	0.335336	0.382486	0.783784	0.999904	-0.227148	0.899921	0.999971	-0.104108	0.0286267	0.627195	-1.81177	WRKY36, expressed
LOC_Os02g37060	606.65	161.1	82.4298	196.002	142.027	79.822	128.071	74.6997	95.909	462.7	145.804	113.28	0.957365	0.999904	0.0171625	0.201964	0.999971	-0.409624	0.028628	0.627195	-0.702593	photosystem II 5 kDa protein, chloroplast precursor, putative, expressed
LOC_Os04g55940	20.8245	20.3814	27.0633	23.9873	23.4137	25.8379	26.1151	23.5031	26.3041	20.6369	20.4107	23.3567	0.507184	0.999904	0.0511815	0.0882621	0.999971	0.131547	0.0286491	0.627195	0.16887	sodium/calcium exchanger protein, putative, expressed
LOC_Os11g01270	10.4096	10.4636	10.5912	11.0253	10.4786	10.1422	8.87618	9.26988	7.48144	9.81109	9.99174	11.8572	0.975236	0.999904	-0.00294949	0.960371	0.999971	0.00472113	0.0286876	0.627473	-0.20787	mitochondrial substrate carrier family protein, putative, expressed
LOC_Os01g04580	7.60774	7.64192	5.05507	7.14615	8.81252	6.08087	10.9505	9.32842	8.59221	8.51744	8.04059	6.33212	0.233651	0.999904	-0.129922	0.718333	0.999971	-0.0393458	0.0287414	0.627533	0.238572	Ser/Thr protein kinase, putative, expressed
LOC_Os02g19450	0	0.063121	0.184381	0.0265617	0.286909	0.500353	0	0.0607115	0.252131	0.132217	0.244895	0.52762	0.0205953	0.999904	-1.61441	0.554274	0.999971	-0.412343	0.0287865	0.627533	-1.52451	ATPase, AAA family protein, expressed
LOC_Os10g17770	22.2647	27.2145	31.1855	23.1704	25.5456	32.8416	20.1462	24.6417	25.0782	24.8967	26.0446	32.694	0.625283	0.999904	-0.0387576	0.735259	0.999971	-0.0268346	0.0287865	0.627533	-0.173512	chromo domain-containing protein LHP1, putative, expressed
LOC_Os03g11160	5.56041	0.540917	0	1.36573	0.553202	0.443564	2.0998	0	0	2.54934	1.92375	1.59581	0.24261	0.999904	-0.964664	0.264881	0.999971	-0.920446	0.0287932	0.627533	-1.80494	cysteine proteinase inhibitor precursor, putative, expressed
LOC_Os04g33520	1.01958	0.923445	0.539491	1.01034	0.440729	0.832971	1.91186	0.68095	1.55742	0.934916	0.696648	0.340543	0.420289	0.999904	0.26807	0.612534	0.999971	0.168462	0.0288227	0.627614	0.727089	RCLEA6 - Root cap and Late embryogenesis related family protein precursor, expressed
LOC_Os09g29430	37.8915	22.4184	24.9754	31.9606	22.2174	23.5273	20.7018	22.9349	19.7791	35.7648	23.8239	23.516	0.870032	0.999904	0.0186167	0.607018	0.999971	-0.058522	0.0288528	0.62771	-0.248669	citrate transporter, putative, expressed
LOC_Os01g70790	16.3935	33.1037	45.9063	19.1697	38.9005	38.355	22.6674	41.758	47.1628	17.8955	39.18	38.3987	0.739075	0.999904	-0.0262726	0.778418	0.999971	0.0221948	0.0289384	0.629009	0.172295	SRC2 protein, putative, expressed
LOC_Os04g52770	1.43791	1.00247	0.846383	0.853502	1.27161	0.707344	0.814503	0.605431	0.0310409	1.3185	1.07033	0.687786	0.897983	0.999904	0.074742	0.89727	0.999971	-0.0752674	0.0290054	0.629745	-1.27286	helix-loop-helix DNA-binding domain containing protein, expressed
LOC_Os01g62410	12.8332	14.7826	17.1663	13.1534	17.1847	17.1059	17.8042	15.9307	17.0939	12.4244	12.0811	17.3468	0.443175	0.999904	0.0740959	0.166193	0.999971	0.133781	0.0290238	0.629745	0.210947	MYB family transcription factor, putative, expressed
LOC_Os10g38360	4.11629	1.61222	3.95258	1.83249	1.33283	3.17068	2.82327	3.0437	5.15429	2.30662	1.36349	2.74387	0.141084	0.999904	0.366653	0.893386	0.999971	-0.033388	0.0291375	0.630962	0.543494	glutathione S-transferase, putative, expressed
LOC_Os08g37030	3.89232	3.59713	3.27075	2.00764	2.27184	2.17348	1.46987	2.07589	2.72244	3.52945	3.40332	2.9044	0.677485	0.999904	0.089733	0.0548138	0.999971	-0.414329	0.0291492	0.630962	-0.470667	gibberellin receptor GID1L2, putative, expressed
LOC_Os06g47860	31.4272	35.8795	40.1281	34.2426	37.7213	37.8946	38.6183	41.0663	45.274	32.8175	37.4624	36.1034	0.93669	0.999904	0.00597593	0.645169	0.999971	0.034644	0.0291807	0.630962	0.164088	expressed protein
LOC_Os09g19870	1.5886	2.23245	0.943943	0.348779	1.38261	0.913421	0.283861	1.04835	0	0.856854	1.73109	0.458237	0.395615	0.999904	0.505439	0.824261	0.999971	-0.13213	0.0292225	0.630962	-1.29738	transposon protein, putative, unclassified, expressed
LOC_Os02g52170	2.0528	0.945932	2.72367	1.73154	1.38663	2.83126	2.29502	2.36554	4.91198	1.58513	1.43742	2.05813	0.878679	0.999904	0.040429	0.638266	0.999971	0.124517	0.0293113	0.630962	0.5772	expressed protein
LOC_Os11g48040	22.6218	24.8614	25.2787	18.6961	26.8859	34.3358	23.0885	28.4317	35.9927	16.0714	27.1716	27.2853	0.583229	0.999904	0.0583825	0.238282	0.999971	0.125484	0.0293218	0.630962	0.231874	mitochondrial carrier protein, putative, expressed
LOC_Os05g48010	3.18257	2.34058	3.30223	1.40704	1.51984	4.23471	2.0191	3.18032	4.64989	1.51751	1.96994	2.24692	0.0603713	0.999904	0.428693	0.656309	0.999971	0.10158	0.029326	0.630962	0.497401	MYB family transcription factor, putative, expressed
LOC_Os02g24642	32.0929	12.4489	14.9839	11.6557	13.8112	4.79618	14.6644	7.81813	2.75383	21.514	10.8538	10.2243	0.318032	0.999904	0.305121	0.223077	0.999971	-0.37231	0.029353	0.630962	-0.665762	photosystem II reaction center protein K precursor, putative, expressed
LOC_Os05g25850	242.121	250.425	247.66	199.54	218.051	305.279	234.747	286.009	296.716	202.745	231.989	255.812	0.352096	0.999904	0.073414	0.657199	0.999971	0.0350122	0.0293583	0.630962	0.171883	superoxide dismutase, mitochondrial precursor, putative, expressed
LOC_Os04g43610	0.138672	0.473577	0.220858	0.366448	0.239262	0.331833	0.459549	0.125982	0	0.376333	0.678328	0.905495	0.247422	0.999904	-0.847659	0.377708	0.999971	-0.646482	0.0293601	0.630962	-1.59664	transposon protein, putative, CACTA, En/Spm sub-class, expressed
LOC_Os04g58030	2.85894	0.988862	0.309486	1.91155	1.74874	0.304084	3.59877	2.49668	1.15206	1.58587	1.05905	0.752125	0.721155	0.999904	-0.114339	0.844019	0.999971	-0.0630314	0.0293645	0.630962	0.697909	expressed protein
LOC_Os11g05270	10.8966	2.12005	6.63516	4.01458	3.97503	1.73849	2.05746	2.03912	0	3.88569	4.45537	5.47273	0.806134	0.999904	0.163256	0.574013	0.999971	-0.373954	0.0294156	0.631086	-1.44877	hypothetical protein
LOC_Os03g60370	31.6719	21.3303	36.7499	19.8092	27.2432	42.2562	31.3584	33.5366	40.2951	20.9243	20.5253	37.4144	0.335692	0.999904	0.144526	0.429131	0.999971	0.1187	0.029422	0.631086	0.326938	histidine acid phosphatase, putative, expressed
LOC_Os02g16030	0.292364	0.146269	0.0457782	0.13849	0.423842	0.059972	0	0.211029	0	0.229789	0.236455	0.242731	0.509876	0.999904	-0.537936	0.652159	0.999971	-0.367939	0.0294611	0.631138	-1.7772	harpin-induced protein 1 domain containing protein, expressed
LOC_Os03g09250	43.9541	54.8674	82.1258	47.269	43.6485	75.9958	64.282	64.2022	75.4097	52.0629	44.9895	68.4941	0.498881	0.999904	0.0697869	0.956825	0.999971	-0.00558682	0.0294762	0.631138	0.224665	inositol-3-phosphate synthase, putative, expressed
LOC_Os04g56320	45.4102	30.0632	20.824	28.0212	31.3871	17.7237	25.6027	17.8079	16.6814	32.6513	26.736	19.0278	0.129578	0.999904	0.178605	0.871145	0.999971	-0.0191128	0.0295523	0.632057	-0.256406	AAA-type ATPase family protein, putative, expressed
LOC_Os01g37870	27.2107	27.0259	21.6748	23.741	26.4105	18.5483	21.9084	20.1696	15.7005	22.6846	25.4155	19.7646	0.13342	0.999904	0.1114	0.905088	0.999971	0.00885081	0.0295764	0.632057	-0.161502	PPR repeat domain containing protein, putative, expressed
LOC_Os11g04104	46.3509	39.6019	76.863	50.5936	51.3137	92.1082	51.676	58.591	90.0404	46.5108	40.8437	91.1031	0.337052	0.999904	-0.0685191	0.123945	0.999971	0.109803	0.0296004	0.632057	0.155266	major facilitator superfamily antiporter, putative, expressed
LOC_Os04g56990	3.65274	3.74596	3.10902	4.12226	3.2057	3.49931	4.09104	2.41167	1.68995	3.74527	4.19329	3.23812	0.722792	0.999904	-0.0598043	0.860754	0.999971	-0.0295734	0.0296228	0.632057	-0.366702	Myb-like DNA-binding domain containing protein, putative, expressed
LOC_Os04g49970	0.487475	0.312982	0.641159	0.538793	0.756579	0.373313	0.386582	0.465236	0.98499	0.208598	0.277201	0.146898	0.0832749	0.999904	0.775702	0.0397537	0.999971	0.920948	0.029841	0.634065	0.972854	U-box, putative, expressed
LOC_Os07g13534	15.5794	17.8431	17.6715	16.9191	15.7882	19.1188	10.6207	13.0431	16.0495	16.8604	17.7939	18.8921	0.734395	0.999904	-0.0480042	0.817779	0.999971	-0.0325989	0.0298842	0.634065	-0.307255	expressed protein
LOC_Os11g28360	8.85103	7.20044	8.16221	9.00683	9.30975	6.93062	7.07311	6.56664	4.88128	8.55289	7.99188	7.12408	0.851889	0.999904	0.021543	0.597543	0.999971	0.0609151	0.0298847	0.634065	-0.250568	ubiquitin carboxyl-terminal hydrolase 5, putative, expressed
LOC_Os07g37230	42.8474	25.0665	55.8674	67.1268	22.0378	34.9014	30.0603	15.6685	37.4995	51.0041	26.6498	42.6446	0.951011	0.999904	0.011093	0.839879	0.999971	-0.0364817	0.0298882	0.634065	-0.392096	inositol-1-monophosphatase, putative, expressed
LOC_Os03g63540	4.39336	5.40496	5.02292	3.8512	4.47644	6.47154	3.99037	7.3674	14.9229	3.54233	4.97448	6.5299	0.956019	0.999904	0.0114008	0.9682	0.999971	-0.00824137	0.0298935	0.634065	0.448902	lysine-rich arabinogalactan protein 19 precursor, putative, expressed
LOC_Os06g43640	91.1227	92.3364	140.772	95.2275	113.027	162.972	103.68	120.217	137.205	85.766	90.596	143.349	0.766663	0.999904	0.0200538	0.0231944	0.999971	0.153421	0.0299106	0.634065	0.146734	Ser/Thr protein phosphatase family protein, putative, expressed
LOC_Os01g24790	1.14606	2.05825	3.15646	2.33854	3.06979	2.59501	1.79774	1.60849	2.29517	2.20956	2.9114	3.70027	0.0462295	0.999904	-0.385181	0.681346	0.999971	-0.079349	0.0299186	0.634065	-0.419553	transferase family protein, putative, expressed
LOC_Os12g13270	6.26668	1.00497	0.918083	4.42329	1.2778	0.400914	2.68868	0.444118	0	4.35239	0.895731	0.520854	0.641779	0.999904	0.343761	0.957253	0.999971	0.0396072	0.0299249	0.634065	-1.60429	expressed protein
LOC_Os03g16050	177.268	103.934	139.294	181.872	71.1953	137.698	104.646	55.017	134.78	182.496	90.8948	123.266	0.608873	0.999904	0.0753022	0.767042	0.999971	-0.0435973	0.0301438	0.638148	-0.319085	fructose-1,6-bisphosphatase, putative, expressed
LOC_Os06g45940	1.36028	0.911596	1.086	0.753715	1.16287	0.590789	0.913224	0.452541	0.743919	1.60151	1.35957	0.780789	0.763868	0.999904	-0.0778257	0.131035	0.999971	-0.391203	0.0302527	0.639613	-0.561342	potassium transporter, putative, expressed
LOC_Os03g38490	27.6919	36.5758	31.347	28.5089	29.8433	34.9886	32.8216	35.2432	42.3132	26.7979	32.5697	33.1096	0.70879	0.999904	0.030921	0.885393	0.999971	0.0119332	0.0302677	0.639613	0.179373	DAG protein, chloroplast precursor, putative, expressed
LOC_Os03g55430	16.8685	20.1292	11.2987	12.4295	21.7052	18.794	24.525	29.8305	16.8238	13.2908	20.8683	15.3707	0.829323	0.999904	-0.0355011	0.716657	0.999971	0.059769	0.0302999	0.639613	0.356731	expressed protein
LOC_Os06g21560	39.8724	35.482	40.6795	40.6858	38.562	41.9494	42.1	43.2992	42.0394	39.0903	35.4609	35.3457	0.45108	0.999904	0.0532037	0.154982	0.999971	0.100401	0.0303377	0.639613	0.152891	CDK5RAP3, putative, expressed
LOC_Os04g37740	3.01685	7.36519	8.71169	3.23825	7.09958	10.2465	6.06329	8.20773	11.3959	3.9899	6.96317	8.65403	0.587926	0.999904	-0.0723821	0.972547	0.999971	-0.00459715	0.0303441	0.639613	0.289287	zinc finger, C3HC4 type domain containing protein, expressed
LOC_Os02g27360	42.256	47.2289	48.0406	34.2148	53.3843	53.465	44.0675	53.2851	60.0352	39.0746	41.0026	52.4388	0.592737	0.999904	0.0435678	0.521699	0.999971	0.0521901	0.0304304	0.64054	0.176303	aspartic proteinase-like protein 2 precursor, putative, expressed
LOC_Os05g48870	18.0531	16.1257	16.54	23.3759	16.4944	12.2168	15.5352	17.1216	11.7677	22.4658	17.8372	17.1176	0.320018	0.999904	-0.118304	0.300734	0.999971	-0.123115	0.0304424	0.64054	-0.25748	auxin response factor 15, putative, expressed
LOC_Os06g23274	4.1553	4.42972	4.98155	3.032	4.04448	4.58185	3.5787	3.40646	4.16711	3.64825	4.77816	5.4683	0.88821	0.999904	-0.0133689	0.0673145	0.999971	-0.174003	0.0304697	0.64054	-0.205802	zinc finger, C3HC4 type, domain containing protein, expressed
LOC_Os07g01300	4.04267	4.93658	2.3321	4.1155	3.23879	2.67328	3.61574	1.4334	0	4.78004	3.91489	3.29748	0.913006	0.999904	-0.0927211	0.833369	0.999971	-0.178556	0.030509	0.64054	-1.83614	expressed protein
LOC_Os05g28800	0.655635	0.470577	0.431167	0.144931	0.549422	0.188284	0	0	0.917151	0.961906	0.965065	0.592716	0.59552	0.999904	-0.434322	0.206848	0.999971	-1.03274	0.0305388	0.64054	-1.7697	LIPLESS1, putative, expressed
LOC_Os03g02690	29.933	8.99861	4.19671	8.19659	8.50817	3.80817	5.10991	4.72328	3.0832	17.5771	7.98702	3.83767	0.415752	0.999904	0.246268	0.44047	0.999971	-0.233433	0.0305457	0.64054	-0.654527	dihydrodipicolinate reductase, putative, expressed
LOC_Os05g24910	0.12083	0	0	0.25315	0.0802662	0	0.0345553	0	0	0.112976	0.0816479	0.116538	0.0766343	0.999904	-1.64846	0.492959	0.999971	-0.63833	0.0307107	0.640598	-2.01179	retrotransposon protein, putative, Ty1-copia subclass, expressed
LOC_Os11g04150	3.90741	3.63334	9.68013	3.95588	6.02793	3.64356	3.16767	3.77286	4.19208	4.68072	5.94711	10.6452	0.346544	0.999904	-0.255593	0.135225	0.999971	-0.405611	0.0307456	0.640598	-0.586595	major facilitator superfamily antiporter, putative, expressed
LOC_Os12g22090	20.1134	23.3251	21.6386	20.5779	24.7675	22.9579	21.4634	24.5341	25.9348	19.1224	20.4472	21.1597	0.391722	0.999904	0.0677289	0.137208	0.999971	0.117529	0.0307681	0.640598	0.17081	expressed protein
LOC_Os06g11330	6.41181	2.46214	2.58915	5.22186	2.82023	4.19954	3.0585	2.65233	2.49148	5.56994	4.33048	5.44784	0.175346	0.999904	-0.383855	0.385024	0.999971	-0.246045	0.0307701	0.640598	-0.61181	OsMADS55 - MADS-box family gene with MIKCc type-box, expressed
LOC_Os03g60560	14.4146	9.57398	21.179	13.6658	12.3135	32.5187	11.0863	13.8128	34.1864	11.6224	6.08529	23.3504	0.29154	0.999904	0.189197	0.0256095	0.999971	0.400383	0.0307704	0.640598	0.387459	ZOS3-21 - C2H2 zinc finger protein, expressed
LOC_Os03g13840	35.816	31.4523	32.1511	40.0641	29.474	41.8677	35.6188	36.9844	41.6573	34.2536	23.4116	36.8021	0.486753	0.999904	0.0677796	0.074258	0.999971	0.173963	0.0307739	0.640598	0.210506	senescence-associated protein, putative, expressed
LOC_Os04g52090	58.4896	134.451	103.605	77.2772	125.298	91.6133	87.9815	144.006	119.947	52.2999	132.765	105.798	0.76503	0.999904	0.0340608	0.569187	0.999971	0.0648721	0.0308341	0.640598	0.246065	AP2 domain containing protein, expressed
LOC_Os10g26470	0.421813	0.530878	0.231165	0.349664	0.424906	0.378549	0.179202	0.310808	0	0.459309	0.373131	0.272381	0.958522	0.999904	0.0341891	0.925356	0.999971	0.0615888	0.0308714	0.640598	-1.4191	sucrose transporter, putativ, expressed
LOC_Os08g20492	3.58353	3.17667	3.78045	5.00048	3.28879	3.37678	3.72992	1.77289	2.08871	5.50397	3.06851	3.00823	0.778646	0.999904	-0.0556322	0.873813	0.999971	0.0314332	0.0308781	0.640598	-0.427238	OsFBX285 - F-box domain containing protein, expressed
LOC_Os09g16790	0.208561	0.0348545	0.135535	0.156271	0.232541	0.241366	0.189306	0.051987	0	0.197456	0.223392	0.380163	0.272216	0.999904	-0.867566	0.794122	0.999971	-0.206199	0.0308915	0.640598	-1.70552	transposon protein, putative, CACTA, En/Spm sub-class, expressed
LOC_Os02g46980	41.0552	27.2436	32.7576	31.2468	18.0278	32.0732	18.856	19.6424	31.4656	44.9009	24.6768	31.8692	0.944162	0.999904	0.0118614	0.191435	0.999971	-0.221232	0.0308923	0.640598	-0.365538	pentatricopeptide, putative, expressed
LOC_Os03g61700	1.57646	0.864937	1.03673	1.57979	0.777931	0.347089	1.07158	0.38941	0.367544	1.50337	0.725892	0.746517	0.471924	0.999904	0.181347	0.406351	0.999971	-0.209326	0.0308926	0.640598	-0.544143	expressed protein
LOC_Os01g58020	82.2075	86.1694	174.537	53.492	125.674	138.97	45.3909	101.451	104.171	71.4652	149.981	141.332	0.698279	0.999904	-0.0681177	0.365645	0.999971	-0.158969	0.0309052	0.640598	-0.379259	ribulose bisphosphate carboxylase large chain precursor, putative, expressed
LOC_Os09g34140	95.0857	16.8809	5.69267	18.2946	16.9167	2.09077	13.2364	7.60902	4.52694	55.6554	16.0715	7.34655	0.788458	0.999904	0.1098	0.0611196	0.999971	-0.76632	0.0309275	0.640598	-0.883102	expressed protein
LOC_Os05g34680	59.4152	50.8839	69.4553	48.5933	60.2303	72.9031	64.5411	68.4259	85.3951	56.9341	56.1899	70.7378	0.753115	0.999904	-0.0253627	0.827789	0.999971	-0.0175414	0.0309499	0.640598	0.173989	expressed protein
LOC_Os06g17970	30.3691	25.1246	20.7244	28.0334	22.4808	19.4019	20.537	16.9929	18.5978	31.4966	21.3714	17.2348	0.242551	0.999904	0.102783	0.823949	0.999971	0.0195664	0.0309888	0.640598	-0.18973	NBS-LRR disease resistance protein, putative, expressed
LOC_Os01g73024	2.49967	1.19373	3.73605	1.63257	1.28867	3.09981	1.1585	1.43521	0.132452	1.97954	3.66654	3.00816	0.73942	0.999904	-0.218013	0.550929	0.999971	-0.390882	0.0310322	0.640598	-1.41355	expressed protein
LOC_Os04g35270	0.269414	0.10109	0.168739	0.425395	0.137849	0.442115	0.0654042	0.0324106	0.269198	0.247042	0.413998	0.82015	0.181598	0.999904	-0.906196	0.588163	0.999971	-0.367335	0.031036	0.640598	-1.46297	alpha-1,4-fucosyltransferase, putative, expressed
LOC_Os03g16030	13.1525	21.107	31.8347	6.05077	25.5824	38.2842	19.1946	31.4941	42.9487	12.1651	16.7064	26.9834	0.512404	0.999904	0.158419	0.906717	0.999971	0.028337	0.0310475	0.640598	0.521487	hsp20/alpha crystallin family protein, putative, expressed
LOC_Os12g38250	4.71434	7.97358	7.57461	4.50009	7.89885	5.69236	7.28302	7.21808	8.99287	5.15796	5.70187	5.46578	0.259243	0.999904	0.18948	0.640122	0.999971	0.0785221	0.0310955	0.640712	0.362078	expressed protein
LOC_Os03g56060	5.45774	3.05372	2.53541	2.91627	2.21151	3.03608	3.56243	4.12419	3.28646	2.55198	2.02578	2.73073	0.0571394	0.999904	0.364088	0.562814	0.999971	0.110757	0.0311102	0.640712	0.412592	CSLC9 - cellulose synthase-like family C, expressed
LOC_Os11g38440	0.77034	0.856636	0.549487	0.540594	0.642697	0.684745	0.872718	0.577286	0.898008	0.41746	0.595583	0.426587	0.0704396	0.999904	0.405479	0.230913	0.999971	0.268518	0.0311842	0.640712	0.48295	expressed protein
LOC_Os12g03240	5.06014	6.46155	14.5245	4.56922	4.40715	8.12645	11.2813	8.04928	13.8342	2.49101	5.63871	10.1779	0.238478	0.999904	0.391349	0.895674	0.999971	0.0435332	0.031192	0.640712	0.715309	MATE efflux family protein, putative, expressed
LOC_Os05g07450	0.0612318	0.196532	0.26861	0.0677363	0.26732	0.175863	0.380501	0.446933	0.284747	0.0373863	0.150102	0.144869	0.47979	0.999904	0.41942	0.485117	0.999971	0.414349	0.0312485	0.640712	1.27843	S-domain receptor-like protein kinase, putative, expressed
LOC_Os04g55720	310.075	242.676	226.573	323.115	216.047	278.947	324.196	325.974	319.755	276.872	251.533	274.742	0.665005	0.999904	-0.0388838	0.929848	0.999971	0.00790553	0.0312553	0.640712	0.193408	D-3-phosphoglycerate dehydrogenase, chloroplast precursor, putative, expressed
LOC_Os01g72320	28.099	21.8587	16.7139	25.1491	21.0064	16.2212	21.9496	17.0619	16.1137	26.9879	20.1112	17.8003	0.780526	0.999904	0.0197931	0.593583	0.999971	-0.0379086	0.0312563	0.640712	-0.152998	FYVE zinc finger domain containing protein, expressed
LOC_Os04g54960	1.49022	0.451632	0.43975	0.823547	0.410568	0.617247	0.2922	0.91705	0	1.31391	1.3304	0.518156	0.632435	0.999904	-0.359211	0.529474	0.999971	-0.472244	0.0312632	0.640712	-1.61746	expressed protein
LOC_Os08g02640	101.627	116.943	153.7	118.153	117.05	151.676	115.38	146.211	156.531	103.636	119.413	140.548	0.810932	0.999904	0.0158882	0.331646	0.999971	0.0644764	0.0313385	0.641248	0.142976	succinate dehydrogenase iron-sulfur subunit 2,mitochondrial precursor, putative, expressed
LOC_Os06g47200	106.924	112.68	136.116	108.053	137.099	173.339	117.005	175.549	209.433	113.902	145.642	167.475	0.0112513	0.999904	-0.176102	0.727691	0.999971	-0.0241907	0.0313621	0.641248	0.149539	LTPL85 - Protease inhibitor/seed storage/LTP family protein precursor, expressed
LOC_Os12g02540	2.8063	0.694387	0.620233	1.91098	0.639736	0.362502	1.52253	0.707368	0.282728	3.03362	0.785017	0.672201	0.711501	0.999904	-0.0932338	0.094665	0.999971	-0.421318	0.0313683	0.641248	-0.542595	BTBN23 - Bric-a-Brac, Tramtrack, Broad Complex BTB domain with non-phototropic hypocotyl 3 NPH3 and coiled-coil domains, expressed
LOC_Os07g23740	11.7493	8.27983	9.1217	10.9406	9.49444	6.36163	11.5102	6.29004	4.7221	10.7367	9.93809	8.47055	0.964898	0.999904	-0.00654115	0.491754	0.999971	-0.102191	0.0314735	0.642279	-0.319722	sterol 3-beta-glucosyltransferase, putative, expressed
LOC_Os06g32650	7.63361	3.81907	7.28024	4.82127	4.85268	4.69759	3.20093	5.42645	3.9293	8.18149	5.83705	6.46572	0.589398	0.999904	-0.12419	0.139884	0.999971	-0.339688	0.0314883	0.642279	-0.494923	expressed protein
LOC_Os02g30460	37.1363	41.4569	39.4477	39.7267	39.6631	43.7282	42.991	45.8234	48.3544	33.3522	40.7783	42.2584	0.822697	0.999904	0.0179368	0.435153	0.999971	0.0624694	0.0314977	0.642279	0.17216	uncharacterized protein MJ0304, putative, expressed
LOC_Os07g37550	881.828	333.772	416.801	706.033	205.543	400.506	408.773	198.007	469.385	944.772	331.69	422.708	0.892099	0.999904	-0.0260199	0.15539	0.999971	-0.272525	0.0315326	0.642343	-0.412464	chlorophyll A-B binding protein, putative, expressed
LOC_Os11g14990	22.1644	15.5615	18.0066	21.367	21.0085	19.0141	26.1128	24.3296	20.8022	19.22	17.88	18.1077	0.992828	0.999904	-0.00106406	0.365138	0.999971	0.107206	0.0315535	0.642343	0.254517	expressed protein
LOC_Os04g58720	2.27941	1.93094	1.56654	2.50575	1.34595	3.14915	2.57537	3.08156	3.46151	2.62113	1.49275	1.44803	0.79242	0.999904	0.0647552	0.391166	0.999971	0.210997	0.0316595	0.643412	0.528704	anthranilate phosphoribosyltransferase, putative, expressed
LOC_Os01g25484	281.269	44.3924	47.3925	48.0288	30.4979	27.1723	43.5141	27.1529	23.6675	243.542	39.9942	31.4153	0.552574	0.999904	0.219369	0.06652	0.999971	-0.677751	0.0316698	0.643412	-0.793603	ferredoxin--nitrite reductase, putative, expressed
LOC_Os08g38130	18.5828	24.9892	30.5294	18.1083	21.1592	36.6839	20.8581	23.9955	45.3356	16.1259	23.1081	33.7249	0.670935	0.999904	0.0396848	0.673737	0.999971	0.039326	0.0317269	0.643412	0.200619	cytokinin-O-glucosyltransferase 1, putative, expressed
LOC_Os04g52504	54.4274	25.0011	22.4729	41.2859	27.0155	41.1636	47.0059	48.4703	46.0647	39.4477	27.521	28.213	0.996256	0.999904	-0.000904711	0.477794	0.999971	0.136848	0.0317637	0.643412	0.413976	adhesive/proline-rich protein, putative, expressed
LOC_Os01g72080	66.9038	68.3707	74.063	65.4241	76.4157	60.6417	88.6214	94.2498	61.9361	61.3072	60.5876	67.5234	0.382108	0.999904	0.0997544	0.567631	0.999971	0.0652321	0.0317646	0.643412	0.245085	calmodulin-like protein 1, putative, expressed
LOC_Os06g43030	3.8406	4.54943	2.56761	3.70274	2.78076	3.49757	4.02502	6.40863	4.3569	2.69179	3.40008	3.64008	0.60418	0.999904	0.0984918	0.883257	0.999971	0.0278987	0.0317768	0.643412	0.407953	protein kinase domain containing protein, expressed
LOC_Os03g56540	35.7597	38.6483	55.7018	27.7982	29.6279	58.964	30.8884	34.0492	61.5779	24.4906	27.0072	53.321	0.00689494	0.999904	0.259497	0.258296	0.999971	0.10857	0.0317907	0.643412	0.206208	heat shock protein DnaJ, putative, expressed
LOC_Os05g50950	15.6381	11.148	3.40586	9.02557	12.6134	4.02606	9.43129	6.12193	3.11692	12.8685	9.49971	4.76907	0.974477	0.999904	0.00577715	0.665583	0.999971	-0.0780462	0.0318477	0.64403	-0.387564	pentatricopeptide repeat protein PPR986-12, putative, expressed
LOC_Os09g20180	3.86834	2.11676	1.13569	3.81748	1.56693	1.43823	2.6999	0.756213	0.0805258	2.21695	1.83805	2.31952	0.994445	0.999904	-0.00401301	0.961724	0.999971	-0.0276609	0.0319212	0.644667	-1.23657	expressed protein
LOC_Os04g41620	0.96487	1.94296	3.86006	2.18621	3.3694	5.50717	1.96758	1.21878	5.0615	3.27357	2.32156	8.31777	0.0045551	0.999904	-0.716106	0.565031	0.999971	-0.145241	0.031932	0.644667	-0.541515	CHIT2 - Chitinase family protein precursor, expressed
LOC_Os03g62500	14.866	11.8905	11.146	12.513	11.3604	11.1979	14.7961	13.806	13.3783	11.8641	13.3204	9.71402	0.365445	0.999904	0.0826649	0.87719	0.999971	0.0141148	0.0319659	0.644818	0.195906	CGMC_GSK.5 - CGMC includes CDA, MAPK, GSK3, and CLKC kinases, expressed
LOC_Os07g23340	5.16767	7.15725	5.28005	5.64715	5.42014	4.92586	5.01102	7.00697	9.52967	4.92595	5.45453	4.46814	0.31582	0.999904	0.161371	0.628693	0.999971	0.0777937	0.0320966	0.646335	0.344788	male sterility protein, putative, expressed
LOC_Os03g48050	14.0556	12.6988	4.58895	7.49221	13.7161	4.00786	6.43722	9.15002	2.49843	9.5521	9.65049	4.57032	0.170443	0.999904	0.220737	0.973755	0.999971	-0.0052977	0.0321322	0.646335	-0.345049	RNA methyltransferase, TrmH family protein, putative, expressed
LOC_Os12g08770	844.501	327.334	289.256	451.804	196.929	290.171	279.401	182.846	349.104	776.21	300.779	343.113	0.996428	0.999904	-0.00103829	0.105553	0.999971	-0.375348	0.0321551	0.646335	-0.496861	photosystem I reaction center subunit N, chloroplast precursor, putative, expressed
LOC_Os10g26520	20.709	19.8914	12.5062	20.7676	21.2646	10.8562	21.9632	14.9426	8.42825	21.5904	19.0685	13.6618	0.784532	0.999904	-0.0296802	0.637566	0.999971	-0.0511396	0.0321649	0.646335	-0.232558	protein kinase domain containing protein, expressed
LOC_Os03g41080	157.226	135.158	179.612	175.063	125.392	165.761	137.544	110.225	146.743	169.84	124.785	163.412	0.633888	0.999904	0.0319627	0.782572	0.999971	0.0185207	0.0322712	0.646335	-0.143688	seed maturation protein PM23, putative, expressed
LOC_Os04g39520	2.34476	0.386187	0	0.359232	0.30488	0.0500024	0.118354	0.195498	0	0.787644	0.381151	0.0899467	0.593966	0.999904	-0.392718	0.500524	0.999971	-0.496269	0.032304	0.646335	-1.57694	ZOS4-08 - C2H2 zinc finger protein, expressed
LOC_Os05g50570	3.08318	1.34411	3.5529	2.76633	2.58059	7.81043	2.31393	3.1425	8.87217	2.27219	1.62695	3.72088	0.926159	0.999904	0.0223754	0.0533778	0.999971	0.466407	0.0323299	0.646335	0.516735	OsSCP29 - Putative Serine Carboxypeptidase homologue, expressed
LOC_Os04g35280	12.6968	10.927	22.8815	17.8191	10.887	14.6732	12.6011	11.1352	16.2889	19.7904	12.7079	22.7307	0.16355	0.999904	-0.196375	0.102371	0.999971	-0.230235	0.0323864	0.646335	-0.301576	neutral/alkaline invertase, putative, expressed
LOC_Os03g61070	0.32014	0.308318	0.175445	0.389226	0.191103	0.068953	0.435224	0.404384	0.261237	0.0880666	0.0543728	0.144709	0.106114	0.999904	0.968785	0.310219	0.999971	0.60838	0.0323935	0.646335	1.28271	expressed protein
LOC_Os05g36110	33.5865	30.6989	34.2937	32.7905	32.1852	36.9451	40.0199	34.0434	41.3183	31.6728	32.2597	33.9873	0.942246	0.999904	0.00558066	0.597794	0.999971	0.0406397	0.0324225	0.646335	0.164782	protein of unknown function DUF502 domain containing protein, expressed
LOC_Os02g11780	33.6467	27.2227	26.6598	34.5502	27.444	24.9836	31.1217	23.4932	20.2137	32.6931	25.127	28.0694	0.782099	0.999904	0.0186753	0.870028	0.999971	0.0110479	0.0324554	0.646335	-0.144411	transcription factor S-II, central domain containing protein, expressed
LOC_Os05g32630	56.2058	62.4276	75.7429	54.5111	74.3284	93.1993	58.1542	77.9109	85.4672	54.6473	60.1614	77.5315	0.840425	0.999904	0.0134826	0.0469466	0.999971	0.133037	0.0324753	0.646335	0.143197	mitochondrial carrier protein, putative, expressed
LOC_Os10g38030	28.63	23.0567	26.8649	30.6032	27.6817	23.3645	23.8512	23.7872	20.9579	29.5443	24.8375	27.4177	0.596113	0.999904	-0.0424778	0.966249	0.999971	-0.00339131	0.032477	0.646335	-0.171394	per1-like family protein, putative, expressed
LOC_Os10g41550	36.301	11.2486	6.37528	65.6574	18.9782	8.31844	71.2153	29.6446	9.31305	48.3877	11.4262	10.5741	0.157237	0.999904	-0.269871	0.312054	0.999971	0.192883	0.0325112	0.646335	0.407942	beta-amylase, putative, expressed
LOC_Os01g47350	16.4466	4.36799	3.69578	7.0354	7.16806	2.79138	3.44971	2.28896	2.76754	11.6104	3.85686	3.79927	0.641471	0.999904	0.147672	0.847613	0.999971	-0.0609421	0.0325738	0.646335	-0.677813	enoyl-CoA hydratase/isomerase family protein, putative, expressed
LOC_Os12g08180	14.1888	17.081	19.193	16.414	18.3539	20.7442	17.1166	21.8013	22.172	17.0278	18.9205	16.316	0.570176	0.999904	-0.0411751	0.410377	0.999971	0.0596988	0.0325821	0.646335	0.154985	receptor-like protein kinase 2 precursor, putative, expressed
LOC_Os05g41640	546.521	145.096	148.871	190.871	121.037	117.855	111.179	83.7014	130.495	435.155	140.118	131.692	0.661963	0.999904	0.128029	0.220948	0.999971	-0.358433	0.0326021	0.646335	-0.625773	phosphoglycerate kinase protein, putative, expressed
LOC_Os12g26660	2.58808	2.05948	0.589116	1.72881	1.14213	0.65756	1.11769	0.813088	0.530171	2.57207	1.19644	1.14232	0.907307	0.999904	-0.0352643	0.283654	0.999971	-0.324714	0.0326107	0.646335	-0.647171	retrotransposon protein, putative, LINE subclass, expressed
LOC_Os05g35980	6.01875	11.4876	9.87668	6.44688	9.03298	7.56551	5.74808	8.78021	6.41049	7.14435	9.83504	8.19253	0.521035	0.999904	0.0564939	0.322848	0.999971	-0.0870295	0.0326185	0.646335	-0.1881	expressed protein
LOC_Os01g55880	18.3671	13.252	13.674	17.4361	11.1957	9.40641	14.7852	9.60917	11.5978	20.315	13.4563	11.7355	0.907952	0.999904	0.0117988	0.0717937	0.999971	-0.183726	0.0326347	0.646335	-0.218026	hemimethylated DNA binding domain containing protein, expressed
LOC_Os11g34305	4.29057	4.29019	4.7861	3.94902	5.12255	4.11518	3.17288	2.86571	2.00992	4.88802	4.42042	2.77754	0.487531	0.999904	0.127056	0.545218	0.999971	0.110713	0.0326365	0.646335	-0.391014	transposon protein, putative, Mutator sub-class, expressed
LOC_Os06g07878	14.2217	15.1224	14.9558	14.3389	12.0861	14.3413	14.7588	16.7387	16.5786	12.9909	13.8036	11.7072	0.181305	0.999904	0.141634	0.582453	0.999971	0.0582543	0.0326444	0.646335	0.226364	peptidase, T1 family, putative, expressed
LOC_Os10g35490	1.41514	1.36288	0.659206	3.48016	1.14041	0.761998	2.16434	0.7746	0.618627	2.17139	2.04297	1.30218	0.0572575	0.999904	-0.498871	0.42358	0.999971	-0.209962	0.0326507	0.646335	-0.560534	hydrolase, alpha/beta fold family domain containing protein, expressed
LOC_Os05g04000	168.149	110.989	113.224	184.476	99.2831	179.508	174.179	217.568	183.147	146.946	124.747	123.687	0.892166	0.999904	-0.0239073	0.475279	0.999971	0.125902	0.0326863	0.646516	0.376678	expressed protein
LOC_Os03g55740	0.806804	0.834805	1.84899	0.972805	1.00701	0.947851	0.872482	0.370587	0	1.14334	1.07962	1.61032	0.852716	0.999904	-0.150407	0.762529	0.999971	-0.244794	0.0328711	0.649043	-1.72856	SSA4 - 2S albumin seed storage family protein precursor, expressed
LOC_Os07g49460	73.8607	70.4561	71.2278	81.495	70.2064	60.0319	68.2496	53.672	58.4578	72.387	69.7233	65.6949	0.580851	0.999904	0.0367204	0.835513	0.999971	0.0138089	0.0328762	0.649043	-0.141895	response regulator receiver domain containing protein, expressed
LOC_Os03g23030	3.40202	2.42805	1.69827	2.544	2.48655	1.16884	2.78567	1.75862	0.674061	2.80036	2.25019	1.75455	0.672571	0.999904	0.0788659	0.479913	0.999971	-0.13183	0.0328939	0.649043	-0.398111	aberrant pollen transmission 1, putative, expressed
LOC_Os08g41440	7.0864	4.66166	4.31312	6.00116	3.46228	4.00919	5.08995	8.05439	5.78499	4.84125	3.66682	4.02184	0.224995	0.999904	0.229374	0.777691	0.999971	0.053372	0.0329666	0.649951	0.403129	UDP-glucuronate 4-epimerase, putative, expressed
LOC_Os06g38660	220.383	173.392	155.541	176.001	164.892	228.751	203.923	280.126	265.421	200.638	182.003	160.434	0.976805	0.999904	0.00437573	0.771505	0.999971	0.0437069	0.0331027	0.651647	0.320696	expressed protein
LOC_Os08g13890	14.912	11.4092	9.38937	10.6882	11.9316	8.71899	12.1674	8.69977	7.86139	13.8184	13.3427	9.92937	0.70594	0.999904	-0.0457888	0.176839	0.999971	-0.163896	0.0331383	0.651647	-0.258534	exonuclease, putative, expressed
LOC_Os03g62080	0.334906	0.366521	0.179132	0.185081	0.324867	0.0901668	0.0711404	0.123386	0	0.211128	0.177753	0.175713	0.568259	0.999904	0.386734	0.937152	0.999971	-0.0534402	0.0331673	0.651647	-1.44364	mRNA-decapping enzyme, putative, expressed
LOC_Os11g18980	0.187636	0.459981	0.0411318	0.331822	0.0672041	0.0269425	0.0637718	0.0632033	0	0.240877	0.446156	0.145396	0.612228	0.999904	-0.411237	0.265066	0.999971	-0.904176	0.0331929	0.651647	-1.72783	expressed protein
LOC_Os06g05710	0.792908	0.771341	1.0622	0.779004	0.788861	0.885525	1.64686	1.26123	1.64323	1.21178	0.548649	0.17067	0.293937	0.999904	0.523398	0.346984	0.999971	0.469006	0.0332664	0.651647	1.06166	pollen-specific protein, putative, expressed
LOC_Os02g58310	14.8277	6.86634	87.2694	34.7719	10.4848	78.0922	6.47275	6.07665	56.0491	28.7861	6.70349	79.7358	0.544028	0.999904	-0.183267	0.493664	0.999971	0.206754	0.0333221	0.651647	-0.642827	expressed protein
LOC_Os01g59930	63.4806	58.9474	61.9102	64.7935	59.0842	71.2839	70.2051	66.8094	78.297	65.007	58.6841	62.518	0.884106	0.999904	-0.0101156	0.498719	0.999971	0.0469467	0.0333347	0.651647	0.147676	NADH-cytochrome b5 reductase, putative, expressed
LOC_Os01g49820	15.4595	16.9512	26.3752	16.1848	20.5309	32.3773	20.2553	18.5341	29.2471	16.4793	16.3608	24.3703	0.84153	0.999904	0.0164356	0.0430224	0.999971	0.166339	0.0333842	0.651647	0.174883	lipid phosphatase protein, putative, expressed
LOC_Os04g55570	1.48119	1.0428	0.485367	1.654	0.710989	0.241188	1.531	0.797251	0.24921	1.82026	0.976877	0.739533	0.407263	0.999904	-0.186016	0.0252953	0.999971	-0.502091	0.0333872	0.651647	-0.47752	plant protein of unknown function DUF869 domain containing protein, expressed
LOC_Os08g39870	0.913223	0.436115	0.545968	1.89637	0.412982	0.576173	0.799456	0.652506	0.419376	1.97928	1.31602	0.643312	0.0318349	0.999904	-0.671374	0.171413	0.999971	-0.427782	0.0333943	0.651647	-0.665379	Os8bglu28 - beta-glucosidase homologue, similar to Os4bglu12 exoglucanase, expressed
LOC_Os02g50374	0.403347	2.41311	1.03154	0.594412	2.72876	0.482636	0	1.52846	0.548559	0.431496	2.51185	1.04183	0.949743	0.999904	-0.037841	0.846925	0.999971	-0.115898	0.0334338	0.651647	-1.27689	expressed protein
LOC_Os04g56470	3.5053	2.99319	0.808842	1.1555	2.82663	0.838873	5.18771	4.27906	1.36208	2.05823	1.77559	1.23993	0.483345	0.999904	0.208691	0.583837	0.999971	-0.163095	0.0334344	0.651647	0.633226	amino acid transporter, putative, expressed
LOC_Os12g33415	3.22082	3.06815	1.98529	0.912341	1.15562	1.80265	1.07746	1.02127	0.726151	2.14023	1.79389	2.58277	0.558615	0.999904	0.223703	0.161559	0.999971	-0.535393	0.0334368	0.651647	-0.813425	expressed protein
LOC_Os07g38570	4.60637	6.77235	8.09718	5.37948	7.73033	7.07711	3.24929	5.34281	6.18031	5.81777	7.57749	9.54088	0.421798	0.999904	-0.169367	0.580986	0.999971	-0.116371	0.0334421	0.651647	-0.448397	expressed protein
LOC_Os05g37225	0.838983	1.33947	0.324554	0.763663	1.11948	0.779505	0.335465	1.08054	0	1.26711	1.00584	0.541764	0.770449	0.999904	-0.203449	0.987655	0.999971	-0.0107885	0.0334534	0.651647	-1.48277	expressed protein
LOC_Os08g02210	57.8098	29.485	85.3967	85.8083	21.7513	66.0892	24.9735	18.7717	63.4712	76.083	26.8085	68.2844	0.952649	0.999904	0.0142625	0.873026	0.999971	-0.0383861	0.0335762	0.653516	-0.510431	expressed protein
LOC_Os03g27040	6.98993	5.63552	11.3542	7.83694	7.5346	11.3365	5.9819	4.82755	6.74145	7.33172	7.71523	9.44947	0.70289	0.999904	-0.0595627	0.6225	0.999971	0.0768789	0.0336434	0.653812	-0.331732	heavy metal-associated domain containing protein, expressed
LOC_Os05g42960	0.282911	0.182139	0.263405	0.271434	0.294539	0.127341	0.246905	0.141349	0.0293905	0.279504	0.294434	0.177016	0.952533	0.999904	-0.0237887	0.773386	0.999971	-0.115074	0.0336842	0.653812	-0.848755	retrotransposon protein, putative, unclassified, expressed
LOC_Os04g42784	18.2892	10.2412	10.3235	16.4976	10.4374	7.81192	13.5832	8.07518	9.17581	17.2844	10.6301	9.18996	0.573109	0.999904	0.0447268	0.353228	0.999971	-0.0736886	0.033706	0.653812	-0.168561	DNA mismatch repair protein, putative, expressed
LOC_Os10g38570	0.581284	1.32321	1.52909	0.770973	0.69398	1.25199	0.395122	0	0.67762	0.746221	0.98726	1.12607	0.857705	0.999904	0.113903	0.91905	0.999971	-0.0645635	0.0337138	0.653812	-1.349	retrotransposon protein, putative, unclassified
LOC_Os07g48080	0.306334	0.156451	0.223839	0.0282152	0.198101	0.329897	0.520569	0.365449	0.238068	0.070224	0.101166	0.131874	0.189771	0.999904	0.750948	0.652964	0.999971	0.257511	0.0337254	0.653812	1.21602	expressed protein
LOC_Os10g35370	186.153	106.837	94.246	143.074	78.3553	97.3636	79.4171	66.2909	93.5072	193.81	103.286	81.992	0.815012	0.999904	0.0438216	0.474612	0.999971	-0.133918	0.0337987	0.654713	-0.397537	oxidoreductase, short chain dehydrogenase/reductase family domain containing family, expressed
LOC_Os10g10170	153.82	92.3637	42.4667	89.1255	92.528	37.4238	85.5809	57.4582	35.9014	130.691	79.7472	38.7967	0.300336	0.999904	0.132955	0.493021	0.999971	-0.0879995	0.0338425	0.65498	-0.272395	PPR repeat domain containing protein, putative, expressed
LOC_Os01g74170	2.547	0.387817	0.445045	1.26477	0.727146	0.132508	1.50547	0.310844	0.0430306	1.82778	0.752321	0.357542	0.938573	0.999904	-0.0347971	0.332632	0.999971	-0.437465	0.0338662	0.65498	-0.958018	expressed protein
LOC_Os05g24010	21.7132	19.4821	21.1344	22.3398	24.9882	23.6016	26.5961	26.9344	20.4964	22.3569	20.9418	19.7669	0.872227	0.999904	-0.0119538	0.107146	0.999971	0.11975	0.0339379	0.655845	0.15763	receptor protein kinase-like, putative, expressed
LOC_Os05g28090	114.551	54.3736	28.1643	50.173	56.1075	31.5121	42.038	27.6979	23.524	76.1439	53.5143	25.3587	0.395165	0.999904	0.175915	0.81344	0.999971	-0.0488236	0.034048	0.657454	-0.438501	expressed protein
LOC_Os06g46940	6.34628	8.98179	8.34328	5.23107	6.65482	3.79632	4.98169	4.22411	3.41467	4.54243	9.13636	5.59014	0.190758	0.999904	0.238454	0.309479	0.999971	-0.185231	0.0341044	0.65802	-0.386173	Os6bglu25 - beta-glucosidase homologue, similar to Os3bglu6, expressed
LOC_Os07g27660	0.500565	0.4352	0.461432	0.189431	0.390522	0.434847	0	0.854666	0	0.663831	0.50463	0.325466	0.973782	0.999904	-0.0281048	0.659215	0.999971	-0.377113	0.0342027	0.658857	-1.8109	transposon protein, putative, Pong sub-class
LOC_Os01g44090	3.96511	1.14656	2.43215	3.09591	1.12917	3.52578	3.39996	3.21649	5.93683	3.86934	1.37983	2.34901	0.871982	0.999904	-0.0417365	0.989827	0.999971	-0.00330235	0.03421	0.658857	0.548468	X8 domain containing protein, expressed
LOC_Os02g17710	0.454841	0.398222	3.36938	0.537394	0.505573	1.77914	0.133265	0.383022	1.04216	0.661561	0.710351	1.21534	0.946171	0.999904	0.0245803	0.886299	0.999971	-0.052057	0.0342346	0.658857	-0.77083	receptor-like protein kinase 5 precursor, putative, expressed
LOC_Os07g47640	696.398	219.488	161.007	289.607	181.662	155.047	202.933	117.905	174.492	526.235	213.716	174.298	0.755028	0.999904	0.0754009	0.229854	0.999971	-0.290166	0.0342558	0.658857	-0.511599	ultraviolet-B-repressible protein, putative, expressed
LOC_Os06g39240	5.41855	12.5305	47.2037	5.5223	9.36754	65.7297	6.87703	15.2889	80.0645	7.80779	6.37031	41.6695	0.515099	0.999904	0.144592	0.452192	0.999971	0.166994	0.0343706	0.660119	0.469972	endothelial differentiation-related factor 1, putative, expressed
LOC_Os01g56930	37.7786	28.1755	40.5489	36.1058	38.43	44.4639	40.2188	41.2198	47.2743	36.2032	29.4059	45.0776	0.651075	0.999904	-0.0357629	0.278086	0.999971	0.0857663	0.0344012	0.660119	0.167269	eukaryotic aspartyl protease domain containing protein, expressed
LOC_Os04g07860	5.20206	4.02294	3.78673	3.87904	3.98037	2.9116	4.2335	2.63565	2.12385	5.09565	3.243	3.0972	0.224019	0.999904	0.145068	0.730201	0.999971	-0.0411444	0.0344123	0.660119	-0.252361	retrotransposon protein, putative, unclassified, expressed
LOC_Os06g06630	4.59096	2.58017	1.89735	7.66828	2.20474	0.205753	4.17149	1.28175	0.302595	7.18596	3.00623	2.17147	0.630236	0.999904	-0.242266	0.113619	0.999971	-0.796224	0.0344297	0.660119	-1.06439	expressed protein
LOC_Os07g46670	88.9674	52.3209	49.8498	76.7984	51.2413	60.2222	81.8332	78.5851	74.2849	77.2267	59.6602	54.0547	0.818304	0.999904	-0.0239992	0.889681	0.999971	-0.0144907	0.0344646	0.66027	0.220909	early response to dehydration 15, putative, expressed
LOC_Os06g05160	6.17517	8.29402	15.9028	9.77575	12.7649	21.1787	9.42769	15.7485	19.8868	8.04055	8.30834	20.8128	0.138475	0.999904	-0.178538	0.0731338	0.999971	0.215957	0.0345886	0.661767	0.254659	sulfate transporter, putative, expressed
LOC_Os11g03920	15.197	24.9026	18.804	15.9161	24.2714	25.2057	17.1262	24.1242	32.0535	13.9986	22.4436	18.6041	0.618536	0.999904	0.0650105	0.188264	0.999971	0.171785	0.034597	0.661767	0.275884	expressed protein
LOC_Os11g44280	28.2864	53.9011	27.356	33.1033	16.8852	37.0325	16.9654	63.053	17.457	70.184	61.23	61.2436	0.136986	0.999904	-0.603878	0.0412621	0.999971	-0.828752	0.0346782	0.662542	-0.857668	hypothetical protein
LOC_Os02g56200	40.0436	27.0726	40.0492	40.5103	26.9877	33.5808	26.4727	26.5329	33.0568	40.3138	27.0886	38.2787	0.89335	0.999904	0.0121987	0.650608	0.999971	-0.0412112	0.0347296	0.662542	-0.192126	ELMO/CED-12 family protein, putative, expressed
LOC_Os04g38310	3.42944	3.02022	1.53678	3.92517	2.07372	2.57431	3.18596	2.62076	1.16748	4.0167	3.95731	2.26232	0.182494	0.999904	-0.270272	0.38269	0.999971	-0.17698	0.0347813	0.662542	-0.427957	expressed protein
LOC_Os08g05920	0.0813612	0.350326	0	0.262921	0.396215	0.168922	0.0611561	0	0.0375917	0.419983	0.23539	0.109039	0.196196	0.999904	-1.17875	0.866631	0.999971	0.153163	0.0347884	0.662542	-1.92509	retrotransposon protein, putative, unclassified, expressed
LOC_Os04g32920	99.5831	139.197	87.237	163.523	109.515	101.944	168.393	149.326	112.164	119.976	133.757	71.1517	0.897153	0.999904	0.0186925	0.273136	0.999971	0.158477	0.0348006	0.662542	0.30523	potassium transporter, putative, expressed
LOC_Os10g21388	3.26437	2.07856	0	0	4.0744	0.213059	0	1.49941	0	1.36059	3.52815	1.9163	0.357672	0.999904	-1.33828	0.172008	0.999971	-1.98714	0.0348802	0.662542	-3.06958	expressed protein
LOC_Os10g17520	3.963	2.32761	1.10736	2.21073	1.78406	1.16595	1.78032	1.05097	0.969917	3.70321	2.06238	1.53506	0.876361	0.999904	-0.0448859	0.288744	0.999971	-0.306063	0.0348833	0.662542	-0.608649	expressed protein
LOC_Os07g07440	2.45902	3.02755	5.13776	1.61375	1.55962	2.97919	3.00347	4.07677	3.76235	1.47973	1.56616	3.42388	0.0610645	0.999904	0.516257	0.950935	0.999971	-0.01696	0.0348888	0.662542	0.581476	versicolorin reductase, putative, expressed
LOC_Os06g42630	0.229439	0.0803513	0.251477	0.304311	0.356097	0.32945	0.467876	0.463705	0.909376	0.336618	0.0779362	0.0888945	0.763926	0.999904	0.192586	0.209083	0.999971	0.805467	0.0349015	0.662542	1.35272	B3 DNA binding domain containing protein, expressed
LOC_Os06g40850	1.15492	1.00902	0.695987	1.13708	1.03599	0.690385	1.00446	1.24958	1.48806	0.883543	0.657551	0.737857	0.365841	0.999904	0.210223	0.35821	0.999971	0.213592	0.0349333	0.662542	0.490316	IQ calmodulin-binding motif family protein, putative, expressed
LOC_Os06g47210	5.7812	4.60852	3.89187	4.5557	5.30434	3.65099	4.03281	4.38753	2.08004	4.90846	4.64678	3.62945	0.554222	0.999904	0.0745056	0.853615	0.999971	0.0232429	0.0349364	0.662542	-0.265687	oligopeptidase, putative, expressed
LOC_Os05g11810	18.6418	20.0157	27.4553	15.2635	25.5332	24.4152	21.402	24.8086	28.2872	15.1755	20.8345	26.581	0.483657	0.999904	0.0655281	0.642571	0.999971	0.043419	0.0349802	0.662791	0.197266	gibberellin 2-beta-dioxygenase 1, putative, expressed
LOC_Os11g07020	1270.23	325.5	1272.96	1246.94	241.715	1011.4	469.214	257.497	1083.02	1444.29	332.764	1157.13	0.933996	0.999904	-0.0187953	0.382131	0.999971	-0.198344	0.0350039	0.662791	-0.47847	fructose-bisphospate aldolase isozyme, putative, expressed
LOC_Os11g01869	9.03189	8.68262	8.26866	6.76425	7.28283	8.37374	9.54734	11.5932	8.90252	6.93174	8.20432	8.55781	0.401055	0.999904	0.0950686	0.639802	0.999971	-0.0529806	0.0350432	0.66302	0.238635	double-stranded RNA binding motif containing protein, expressed
LOC_Os12g24050	0.125729	0.101611	0.0742031	0.0748272	0.0635057	0.0694359	0.180787	0.00814433	0	0.10642	0.136884	0.0686975	0.980381	0.999904	-0.0184222	0.639327	0.999971	-0.351083	0.035095	0.663274	-1.57866	retrotransposon protein, putative, unclassified, expressed
LOC_Os01g04380	0.797697	0.897163	2.60192	0.249424	0.49038	3.15214	1.25493	1.86456	5.19046	0.275928	0.80439	2.39996	0.413071	0.999904	0.392067	0.842176	0.999971	-0.0953755	0.0351925	0.663274	1.00885	hsp20/alpha crystallin family protein, putative, expressed
LOC_Os03g37260	11.4237	8.54309	7.16478	7.0146	8.42931	7.05109	5.79689	5.74521	7.21333	9.25297	9.24294	6.95665	0.70626	0.999904	0.0533579	0.411037	0.999971	-0.116386	0.0351953	0.663274	-0.298175	pentatricopeptide, putative, expressed
LOC_Os01g57420	16.9959	12.671	20.6908	14.7416	14.9935	19.7399	9.99094	13.9634	16.0161	15.7534	13.0169	23.822	0.798849	0.999904	-0.0310694	0.77026	0.999971	-0.0356044	0.0351957	0.663274	-0.256773	diacylglycerol kinase, putative, expressed
LOC_Os05g43780	18.5198	17.4627	21.3673	17.9986	18.801	19.0403	16.9944	14.2981	13.7752	17.5075	16.6036	20.8468	0.63808	0.999904	0.043308	0.807191	0.999971	0.0224696	0.0352287	0.663274	-0.193872	ESP1, putative, expressed
LOC_Os05g19470	9.74213	12.0481	11.5629	7.54937	10.943	10.5916	13.3758	13.0305	13.513	9.26797	10.5664	10.3223	0.4714	0.999904	0.0975522	0.734675	0.999971	-0.0459062	0.0352641	0.663274	0.285167	expressed protein
LOC_Os03g08560	0.265296	0.554665	0.482279	0.419309	0.294966	0.251665	0.106387	0.162766	0.210838	0.223789	0.51542	0.311857	0.526458	0.999904	0.222296	0.895775	0.999971	-0.0459737	0.0352928	0.663274	-0.738732	plasma membrane ATPase, putative, expressed
LOC_Os04g33060	61.7457	40.0754	91.4648	89.0466	28.8245	85.1829	41.9082	28.3332	77.7544	79.8082	39.4988	82.2501	0.777256	0.999904	-0.0457283	0.734914	0.999971	-0.0547317	0.0352967	0.663274	-0.340248	NAD dependent epimerase/dehydratase family protein, putative, expressed
LOC_Os05g33760	2.17003	2.6852	3.13958	3.35786	2.27985	2.43043	1.52422	2.26595	2.19238	2.81229	3.0959	2.87728	0.574907	0.999904	-0.104671	0.604791	0.999971	-0.0965871	0.0353409	0.663274	-0.392758	PPR repeat domain containing protein, putative, expressed
LOC_Os12g02680	3.51815	4.29029	6.19727	6.94377	8.32545	6.76565	7.25969	7.30077	9.66713	4.95422	3.3433	7.05882	0.750975	0.999904	-0.0741105	0.0865137	0.999971	0.400283	0.0353436	0.663274	0.491432	expressed protein
LOC_Os11g13890	1141	243.047	323.621	589.796	143.607	324.089	270.716	131.143	398.104	1184.69	238.052	363.357	0.886232	0.999904	-0.0446372	0.161303	0.999971	-0.437003	0.0353625	0.663274	-0.65648	chlorophyll A-B binding protein, putative, expressed
LOC_Os01g11150	1.34887	0.659948	1.78281	1.31547	2.22611	1.73745	0.26967	1.637	0.138742	0.945832	1.50483	3.17664	0.598331	0.999904	-0.344892	0.951393	0.999971	0.0399081	0.035383	0.663274	-1.37743	gibberellin 2-beta-dioxygenase, putative, expressed
LOC_Os08g03310	107.998	16.5278	2.59461	76.6887	14.9582	2.4943	70.7403	9.76704	3.98099	106.572	17.5275	5.94054	0.183847	0.999904	-0.291135	0.0403494	0.999971	-0.449112	0.0354306	0.663657	-0.460777	zinc finger family protein, putative, expressed
LOC_Os09g20820	11.1127	11.7995	8.17769	9.95964	10.1307	9.88334	13.7057	11.6367	12.495	10.3345	11.4077	8.92324	0.953985	0.999904	0.00594503	0.878446	0.999971	-0.0157572	0.0355586	0.665544	0.21656	enolase, putative, expressed
LOC_Os01g68490	1.4304	1.55479	0.888949	1.09427	1.18756	1.05519	0.895851	0.784137	0.966965	1.36138	1.2254	1.32088	0.843536	0.999904	-0.0363179	0.39841	0.999971	-0.155388	0.0356794	0.666153	-0.386519	tetratricopeptide-like helical, putative, expressed
LOC_Os08g25720	52.1215	53.2969	34.8528	39.1161	51.5733	51.1291	58.9521	60.3528	49.6302	43.3382	49.5544	39.895	0.729525	0.999904	0.0403063	0.583678	0.999971	0.0638849	0.0356988	0.666153	0.244845	pyrophosphate--fructose 6-phosphate 1-phosphotransferase subunit alpha, putative, expressed
LOC_Os05g45770	16.5774	17.502	22.1038	18.4765	12.7342	22.08	13.1441	12.3042	22.4984	18.2823	20.9897	21.7204	0.498489	0.999904	-0.0877402	0.230573	0.999971	-0.155407	0.0357191	0.666153	-0.27223	Divergent PAP2 family domain containing protein, expressed
LOC_Os12g08740	14.9556	14.2032	16.3065	15.5517	15.3887	13.6804	12.6224	12.1376	14.2086	15.8443	14.2987	16.4708	0.762929	0.999904	-0.0252383	0.619663	0.999971	-0.0415283	0.0357214	0.666153	-0.175717	exonuclease, putative, expressed
LOC_Os06g02144	397.461	316.781	302.089	400.241	295.728	345.594	432.025	407.966	389.456	388.731	329.857	332.511	0.618968	0.999904	-0.0384957	0.879215	0.999971	-0.0117632	0.0357277	0.666153	0.162556	6-phosphogluconate dehydrogenase, decarboxylating, putative, expressed
LOC_Os03g03600	0.61393	0.198029	0.708316	0.714273	0.462919	0.904736	0.164729	0.57141	0.150669	0.592578	0.621964	0.938932	0.355609	0.999904	-0.446907	0.92569	0.999971	-0.0451226	0.0358524	0.667481	-1.01528	fasciclin-like arabinogalactan protein, putative, expressed
LOC_Os12g03610	2.02984	3.00786	2.22482	2.7421	2.78134	1.4675	0	0.388084	1.84042	1.86129	2.29834	1.31075	0.677289	0.999904	0.279882	0.741566	0.999971	0.221786	0.0358537	0.667481	-1.41135	expressed protein
LOC_Os10g25130	156.632	146.545	154.199	143.793	161.49	243.255	169.335	227.087	219.697	144.19	152.945	192.988	0.576289	0.999904	-0.0618856	0.383996	0.999971	0.0964093	0.0358954	0.667534	0.232354	aminotransferase, classes I and II, domain containing protein, expressed
LOC_Os05g41450	7.72081	6.47623	5.52266	8.94037	5.78363	7.32456	9.4926	3.6331	4.17104	9.28694	6.34031	6.58885	0.465091	0.999904	-0.113562	0.969424	0.999971	-0.00595881	0.0359727	0.667534	-0.326036	histone-like transcription factor and archaeal histone, putative, expressed
LOC_Os08g15590	7.4458	7.16011	7.91149	6.35994	7.13662	5.3737	4.37202	5.98797	3.02508	5.98307	6.81397	5.01687	0.105654	0.999904	0.240259	0.683275	0.999971	0.0605827	0.035992	0.667534	-0.311381	Leucine rich repeat N-terminal domain containing protein, putative, expressed
LOC_Os09g34000	44.1499	40.026	17.9784	29.9333	38.9464	18.8748	29.0842	28.5909	13.2412	34.283	37.1062	16.2519	0.146395	0.999904	0.142698	0.816511	0.999971	0.0227976	0.0360028	0.667534	-0.206022	expressed protein
LOC_Os01g04620	0.818948	0.919645	1.07929	1.88485	0.45041	0.893701	1.55868	1.35169	1.30098	1.71343	0.315914	0.40273	0.28301	0.999904	0.424159	0.303419	0.999971	0.406597	0.0360347	0.667534	0.828315	transposon protein, putative, unclassified, expressed
LOC_Os06g25010	15.6701	7.55534	7.01579	11.0444	8.95324	8.34856	11.3576	13.7056	12.6478	11.3576	7.39373	7.67722	0.639051	0.999904	0.0839253	0.637821	0.999971	0.0842334	0.0360438	0.667534	0.375126	glycosyl hydrolase, putative, expressed
LOC_Os05g42120	5.50854	9.91867	11.107	8.61572	7.63123	9.514	8.47783	8.75234	13.5093	5.67059	7.73763	9.02692	0.342611	0.999904	0.14146	0.301905	0.999971	0.153883	0.0360481	0.667534	0.312486	heat shock protein, putative, expressed
LOC_Os11g17380	0.359328	0.419465	0.446356	0.185339	0.457592	0.395567	0.284958	0.181554	0	0.395388	0.501791	0.433126	0.920151	0.999904	-0.0799995	0.706726	0.999971	-0.300272	0.036112	0.668208	-1.67245	protein kinase domain containing protein, expressed
LOC_Os02g07930	4.80771	25.5031	21.8917	4.61053	16.523	28.3495	10.0323	22.5649	31.6489	4.63539	19.4931	25.2243	0.768779	0.999904	0.0540081	0.931118	0.999971	-0.0158803	0.0361642	0.668667	0.384904	B-box zinc finger family protein, putative, expressed
LOC_Os12g18190	0.394569	0.340637	0.0786741	0.0635415	0.348228	0.148398	0.135096	0.123967	0	0.251917	0.291412	0.115876	0.910262	0.999904	0.0765829	0.664453	0.999971	-0.29474	0.036252	0.668971	-1.42289	retrotransposon protein, putative, unclassified, expressed
LOC_Os01g18000	0.0210637	0.0726914	0.153004	0.10192	0	0.10644	0	0.0400028	0	0.11627	0.109714	0.0784857	0.697026	0.999904	-0.429863	0.37071	0.999971	-0.988318	0.0362851	0.668971	-2.31165	retrotransposon protein, putative, Ty3-gypsy subclass, expressed
LOC_Os04g36720	34.3677	16.3859	74.9326	46.8984	9.00701	51.9776	19.2382	10.6157	59.5411	60.5899	14.7721	64.7587	0.666829	0.999904	-0.106224	0.192735	0.999971	-0.321391	0.0363066	0.668971	-0.516552	ferric-chelate reductase, putative, expressed
LOC_Os01g45060	1.56075	0.877152	0.693422	1.1763	0.720548	0.600309	0.893805	0.442168	0	1.13716	1.06293	0.583498	0.893836	0.999904	0.0967178	0.885266	0.999971	-0.104578	0.0363086	0.668971	-1.51721	polygalacturonase, putative, expressed
LOC_Os03g44300	64.0939	43.9214	38.9661	48.4725	42.8222	41.1083	50.3734	44.5084	33.2327	57.158	49.3284	42.2437	0.702063	0.999904	-0.0278681	0.134257	0.999971	-0.109096	0.0363185	0.668971	-0.152502	transketolase, putative, expressed
LOC_Os11g11660	0.894542	1.37554	1.02432	1.35809	0.624262	0.183819	1.28012	0	0.0979077	1.02974	1.1296	0.79327	0.913417	0.999904	0.101787	0.546527	0.999971	-0.564471	0.0363782	0.668971	-1.95905	expressed protein
LOC_Os06g36740	25.7297	37.3248	36.0675	29.8662	38.4939	42.1236	33.8447	44.18	38.1512	26.4559	35.4513	38.0028	0.896688	0.999904	-0.00996087	0.174445	0.999971	0.10418	0.036391	0.668971	0.160524	pollen-specific protein SF21, putative, expressed
LOC_Os03g56470	19.537	16.6165	13.194	15.2514	15.538	12.5262	10.3495	11.7736	11.7553	16.4953	13.9837	11.5941	0.1088	0.999904	0.156468	0.706107	0.999971	0.0367936	0.0364216	0.668971	-0.20414	protein kinase family protein, putative, expressed
LOC_Os07g02780	4.88963	2.92013	5.05762	3.38221	3.54702	4.34744	3.71438	2.37237	3.81257	4.36483	3.67566	4.69432	0.909594	0.999904	-0.0143663	0.342053	0.999971	-0.120207	0.0364275	0.668971	-0.264692	STE_MEKK_ste11_MAP3K.20 - STE kinases include homologs to sterile 7, sterile 11 and sterile 20 from yeast, expressed
LOC_Os10g37100	0.235637	0.559971	0.295167	0.334856	0.522453	0.169175	0.228817	0.311819	0	0.463007	0.514554	0.15216	0.974776	0.999904	0.0179351	0.909007	0.999971	-0.0648294	0.0365089	0.669876	-1.1862	cytochrome P450, putative, expressed
LOC_Os05g07810	4.82917	5.85421	6.16552	3.9885	7.44437	6.40078	4.86977	6.07763	8.78451	3.2603	3.66533	7.36761	0.193211	0.999904	0.225848	0.138463	0.999971	0.257162	0.0365386	0.669876	0.36293	universal stress protein domain containing protein, putative, expressed
LOC_Os03g16350	30.4135	36.0354	12.152	19.1787	30.1223	25.897	33.6167	51.4462	23.6802	21.1336	26.6334	18.1681	0.694194	0.999904	0.0876463	0.563435	0.999971	0.128793	0.0365592	0.669876	0.466053	DNA binding protein, putative, expressed
LOC_Os03g45280	880.345	419.841	412.412	840.69	357.499	414.491	517.254	352.488	445.727	790.207	463.608	479.364	0.693994	0.999904	-0.0476228	0.353079	0.999971	-0.112404	0.0365984	0.670048	-0.253004	dehydrin, putative, expressed
LOC_Os01g47490	101.321	99.6366	149.446	91.1528	104.989	180.469	106.569	116.772	182.518	89.0921	111.428	151.51	0.99309	0.999904	0.000585108	0.476211	0.999971	0.0481279	0.0366235	0.670048	0.141189	Lg106, putative, expressed
LOC_Os08g44400	149.134	135.632	199.295	185.088	138.051	175.479	138.072	127.817	140.912	161.337	130.869	192.447	0.967906	0.999904	-0.00307931	0.648674	0.999971	0.0348686	0.0367721	0.671708	-0.159822	glutathione S-transferase, N-terminal domain containing protein, expressed
LOC_Os01g12160	5.35518	3.11354	0.528905	3.9592	2.03547	0.949344	8.54202	2.63033	1.0826	4.38979	2.69616	0.31285	0.341083	0.999904	0.284628	0.426163	0.999971	0.237913	0.0368445	0.671708	0.624097	OsGH3.3 - Probable indole-3-acetic acid-amido synthetase, expressed
LOC_Os02g21340	12.5041	9.04941	10.193	19.1256	11.2736	10.1815	17.5414	7.05045	11.3496	20.6185	11.1783	13.7362	0.00848673	0.999904	-0.336853	0.348689	0.999971	-0.119935	0.0368582	0.671708	-0.267137	ABC-2 type transporter family protein, expressed
LOC_Os07g06590	208.861	197.869	190.259	183.667	206.574	250.644	219.889	230.294	263.334	189.183	212.16	213.618	0.685625	0.999904	-0.0292906	0.613259	0.999971	0.0365717	0.0368632	0.671708	0.151031	ML domain protein, putative, expressed
LOC_Os01g58000	26.2497	11.827	12.6737	13.6266	10.7112	11.0102	12.5945	11.9986	6.47478	18.9347	12.5673	13.9067	0.765358	0.999904	0.0572113	0.21503	0.999971	-0.237671	0.0368651	0.671708	-0.400113	ATP synthase epsilon chain, putative, expressed
LOC_Os02g34970	0.146771	0.471171	1.60869	0.432592	2.36555	1.54548	0.166277	0.370788	0.0570318	0.314028	0.526253	2.71691	0.537629	0.999904	-0.438217	0.566799	0.999971	0.407198	0.0368795	0.671708	-1.48377	no apical meristem protein, putative, expressed
LOC_Os03g16480	17.8748	32.1281	32.192	22.9719	28.5793	31.2777	28.2315	32.4069	36.4856	21.6291	30.2596	30.3725	0.771326	0.999904	-0.0245846	0.879126	0.999971	0.0128638	0.0369158	0.671867	0.176508	zinc finger family protein, putative, expressed
LOC_Os12g34054	1.89845	2.80856	4.36525	1.78995	2.38847	3.50454	1.24067	2.42671	2.28217	1.56204	2.85601	5.22896	0.994091	0.999904	-0.00142825	0.451326	0.999971	-0.145252	0.0371214	0.675105	-0.401971	mitochondrial ribosomal protein S3, putative, expressed
LOC_Os07g24090	5.09816	6.59828	3.705	4.77738	5.24305	5.43064	6.40351	7.5597	7.97794	4.85266	6.8078	5.09915	0.453806	0.999904	-0.100584	0.60692	0.999971	-0.0690817	0.0371633	0.675364	0.279827	mTERF domain containing protein, expressed
LOC_Os02g54920	2.35224	1.81715	1.21326	0.305867	1.15635	0.397361	0.470268	0.815633	0	1.6494	1.64503	0.536094	0.542908	0.999904	0.398808	0.277998	0.999971	-0.711085	0.0371916	0.675375	-1.3658	expressed protein
LOC_Os12g02080	49.4337	46.6281	45.1331	39.9505	39.5903	39.8929	55.5573	49.4844	58.2842	37.9961	52.1813	47.3752	0.700244	0.999904	0.0335998	0.134754	0.999971	-0.130528	0.0372475	0.675594	0.181795	peroxidase precursor, putative, expressed
LOC_Os01g12260	6.27378	5.11041	1.52325	5.04707	5.11982	2.02406	9.24433	5.78471	3.5179	5.57076	5.30524	2.12817	0.634987	0.999904	-0.0837458	0.737376	0.999971	-0.0591561	0.0372748	0.675594	0.367419	vacuolar ATP synthase subunit E, putative, expressed
LOC_Os01g47550	19.9983	26.3985	12.7831	18.5018	20.2511	17.7563	23.4916	25.1309	20.7534	16.419	24.5079	14.1541	0.651959	0.999904	0.0560825	0.665361	0.999971	0.0537798	0.0372868	0.675594	0.258951	kinase, pfkB family, putative, expressed
LOC_Os01g22010	243.807	222.035	286.216	231.346	209.398	335.213	268.287	260.5	366.739	253.13	238.62	272.176	0.781973	0.999904	-0.020185	0.977606	0.999971	-0.00204735	0.0373425	0.675681	0.151853	S-adenosylmethionine synthetase, putative, expressed
LOC_Os01g70460	39.8785	38.9906	19.8944	21.0349	36.1391	18.7624	21.8894	28.4875	10.5294	35.0231	29.8897	16.9667	0.24129	0.999904	0.184423	0.651738	0.999971	-0.071037	0.0373581	0.675681	-0.327655	expressed protein
LOC_Os04g47020	44.4167	30.3442	14.5685	19.8439	25.5263	12.6267	18.3297	13.9023	11.4311	33.2043	23.1846	11.6076	0.140266	0.999904	0.261804	0.53782	0.999971	-0.109371	0.0373747	0.675681	-0.36953	genetic modifier, putative, expressed
LOC_Os05g51570	0.495689	1.00359	4.2785	0.787565	1.51646	5.02678	0.421174	0.678307	2.92531	0.994278	1.2979	3.50093	0.351293	0.999904	-0.245938	0.712866	0.999971	0.0971025	0.0374211	0.67602	-0.549125	vacuolar-processing enzyme precursor, putative, expressed
LOC_Os04g16680	394.594	224.626	285.066	326.843	179.198	280.792	216.41	136.23	265.267	368.422	206.614	230.282	0.340865	0.999904	0.121437	0.880211	0.999971	-0.0192143	0.0375244	0.677029	-0.265199	fructose-1,6-bisphosphatase, putative, expressed
LOC_Os08g06280	71.1011	19.8175	18.9282	41.8871	15.5964	17.9642	24.9475	9.82758	22.4751	71.5918	19.586	18.5012	0.97154	0.999904	0.00878535	0.286973	0.999971	-0.262201	0.0375396	0.677029	-0.512156	LSD1 zinc finger domain containing protein, expressed
LOC_Os07g42420	9.6889	4.01262	1.82868	8.10942	2.71184	1.11125	6.18286	3.36856	1.17164	7.50192	4.33585	1.89512	0.746927	0.999904	0.0471448	0.036904	0.999971	-0.304881	0.0375603	0.677029	-0.303828	3-oxoacyl-synthase, putative, expressed
LOC_Os02g29300	11.5056	13.2555	10.3682	15.4038	14.1242	11.0427	13.4574	9.95236	9.79273	14.9645	12.8776	12.3878	0.143625	0.999904	-0.137607	0.964541	0.999971	0.00418305	0.0376161	0.677085	-0.195625	expressed protein
LOC_Os07g37200	0	0	0	0	0.0433995	0.0831283	0	0.0325508	0	0.0820618	0.11506	0.071452	0.00630046	0.999904	-3.28226	0.267989	0.999971	-1.33095	0.0376571	0.677085	-2.49748	transposon protein, putative, unclassified, expressed
LOC_Os09g38090	10.2844	7.64948	26.3477	9.50137	5.52337	22.05	5.07307	5.97549	21.9371	11.5085	6.13209	25.5044	0.767799	0.999904	0.0465701	0.357614	0.999971	-0.145098	0.0376913	0.677085	-0.32779	expressed protein
LOC_Os03g44710	7.70131	3.80946	4.21484	7.62786	4.57792	7.36584	3.90917	4.37966	4.76245	6.69495	5.26145	7.04128	0.188302	0.999904	-0.231407	0.9357	0.999971	0.0141901	0.0377027	0.677085	-0.365516	YABBY domain containing protein, putative, expressed
LOC_Os03g19970	58.411	54.0268	48.5872	54.2092	61.4524	49.1198	62.6071	65.1147	55.5728	55.1143	55.1316	49.6355	0.9398	0.999904	0.00506774	0.663173	0.999971	0.029226	0.0377224	0.677085	0.139432	CAS1 domain-containing protein 1 precursor, putative, expressed
LOC_Os01g41770	0.551183	0.704295	0.489833	0.592743	0.453517	0.39572	0.632874	0.978482	0.937748	0.382475	0.733728	0.413637	0.529835	0.999904	0.16163	0.916314	0.999971	-0.0270329	0.0377561	0.677085	0.53447	leucine rich repeat protein, putative, expressed
LOC_Os05g10620	6.10901	3.55619	9.18281	5.55604	6.68016	10.1701	6.06235	5.71794	8.93325	4.62685	3.92498	7.16036	0.31296	0.999904	0.14194	0.0113028	0.999971	0.356344	0.0377578	0.677085	0.292238	no apical meristem protein, putative, expressed
LOC_Os12g31780	70.0899	106.542	102.426	76.0417	87.5147	103.958	92.5188	108.065	114.68	73.7051	96.8481	105.385	0.941397	0.999904	0.00510721	0.709707	0.999971	-0.0258611	0.0378263	0.677378	0.144276	nitrilase-associated protein, putative, expressed
LOC_Os02g36360	8.95071	9.15104	10.6901	8.77133	10.6289	15.4759	10.7413	12.7682	16.3779	9.44092	9.77165	12.822	0.336592	0.999904	-0.100579	0.514622	0.999971	0.0682083	0.0378296	0.677378	0.217366	ZOS2-11 - C2H2 zinc finger protein, expressed
LOC_Os06g09450	205.74	194.323	143.96	207.557	165.856	167.303	269.715	235.143	156.445	200.529	194.022	154.271	0.861305	0.999904	-0.0144223	0.887107	0.999971	-0.011719	0.037902	0.677699	0.171363	sucrose synthase, putative, expressed
LOC_Os11g10770	7.46923	8.5866	8.7206	7.71713	9.07241	12.87	8.22276	10.9935	9.84281	7.41478	6.67385	8.53491	0.4432	0.999904	0.0930052	0.0360823	0.999971	0.254224	0.0379138	0.677699	0.251772	disease resistance protein RGA3, putative, expressed
LOC_Os07g12650	96.1173	85.1296	91.6782	101.001	80.5721	108.531	109.397	100.319	131.126	103.78	87.5899	105.8	0.2111	0.999904	-0.0832456	0.692368	0.999971	-0.0263369	0.0379565	0.677699	0.138149	ribosomal protein L7Ae, putative, expressed
LOC_Os05g32390	31.1406	18.2886	13.2303	22.6108	20.8712	11.5218	17.9977	16.6818	10.7467	27.438	19.3579	11.448	0.477155	0.999904	0.0710223	0.724505	0.999971	-0.0352116	0.0379673	0.677699	-0.207327	FZL, putative, expressed
LOC_Os12g06780	3.69192	3.8954	3.47588	4.81299	3.19275	2.41273	1.44781	2.7901	3.42095	4.34018	3.56394	5.1348	0.578162	0.999904	-0.154009	0.366099	0.999971	-0.250316	0.0379865	0.677699	-0.574689	expressed protein
LOC_Os03g10478	14.5318	20.0463	22.8944	12.9799	22.4975	25.0902	16.5434	25.1112	29.8863	13.7801	17.7114	29.7076	0.748527	0.999904	-0.0282883	0.950058	0.999971	0.00552681	0.0380782	0.678075	0.183012	glycosyl hydrolase family 10 protein, putative, expressed
LOC_Os03g24940	2.49048	1.07988	1.08247	2.05274	1.50031	1.89755	1.02156	1.02011	1.18107	2.9956	1.65304	1.11262	0.372792	0.999904	-0.211736	0.928927	0.999971	0.0211902	0.0380927	0.678075	-0.492688	proline-rich family protein, putative, expressed
LOC_Os09g32600	8.76722	7.08993	4.14449	6.65737	5.613	5.47757	6.19826	5.88939	2.45753	7.21073	6.70633	5.79098	0.87639	0.999904	-0.0280716	0.571238	0.999971	-0.102187	0.0380982	0.678075	-0.374258	OsFBX334 - F-box domain containing protein, expressed
LOC_Os01g02750	7.77178	5.01464	6.35678	4.48802	5.183	4.77775	4.53067	3.30302	0.900928	5.78782	5.10848	3.90021	0.456233	0.999904	0.253683	0.97596	0.999971	-0.0102603	0.0381188	0.678075	-0.706021	protein kinase domain containing protein, expressed
LOC_Os04g33050	1.67931	1.27849	1.02434	1.27506	1.3947	0.891135	1.29038	0.811596	0.663888	1.17833	1.27314	1.57473	0.900908	0.999904	-0.0241019	0.500909	0.999971	-0.130283	0.0381939	0.678692	-0.401223	HIRAN domain containing protein, putative, expressed
LOC_Os01g43460	43.2305	17.6052	10.905	11.9935	19.7015	24.9794	32.7938	25.4847	19.8401	15.0459	8.46982	12.5536	0.146792	0.999904	0.548066	0.247366	0.999971	0.436944	0.0382141	0.678692	0.782859	C4-dicarboxylate transporter/malic acid transport protein, expressed
LOC_Os06g11380	45.7342	27.2356	40.2496	36.3802	30.0765	36.4157	26.6568	23.274	33.9039	46.6427	26.3556	34.3091	0.603322	0.999904	0.0571694	0.877939	0.999971	-0.0168971	0.0382369	0.678692	-0.227994	geminivirus Rep-interacting motor protein, putative, expressed
LOC_Os11g26790	3.17723	0.117538	0.24524	0.741909	0.267127	3.27704	1.29277	1.24356	2.66047	0.205168	0.177341	0.606828	0.559999	0.999904	0.476815	0.184076	0.999971	1.08667	0.038306	0.679423	1.69472	dehydrin, putative, expressed
LOC_Os09g06890	0.561739	0.442633	0.615697	0.372525	0.570049	0.887258	0.286378	0.567649	0	0.772639	1.26356	0.443079	0.652812	0.999904	-0.335939	0.72251	0.999971	-0.265181	0.0384378	0.680586	-1.54592	BTB/POZ domain containing protein, expressed
LOC_Os05g04700	4048.71	3017.14	3314.38	3748.29	3187.95	4272.74	4648.59	3578.41	4179.59	3617.48	3026.57	4137.94	0.592411	0.999904	-0.0379064	0.554095	0.999971	0.0418921	0.0384382	0.680586	0.146582	OsRCI2-6 - Hydrophobic protein LTI6B, expressed
LOC_Os03g06710	3.55142	2.32864	1.87045	1.46136	3.23962	1.55633	1.64594	2.01966	0.985713	3.04505	2.91579	1.48915	0.815942	0.999904	0.0516625	0.386539	0.999971	-0.192189	0.0384553	0.680586	-0.459428	PPR repeat domain containing protein, putative, expressed
LOC_Os04g47912	2.46913	2.43201	2.20902	2.67475	2.59585	1.79034	2.71378	2.14132	0.875288	3.31233	2.58176	1.9355	0.692778	0.999904	-0.0741021	0.619299	0.999971	-0.0931873	0.0385317	0.681138	-0.388087	expressed protein
LOC_Os02g36020	0	0	0.7352	0	0.201811	0.567299	0	0	0.158974	0.18517	0.0444355	0.439113	0.10208	0.999904	-1.89231	0.551024	0.999971	-0.690121	0.0385423	0.681138	-2.39488	transposon protein, putative, CACTA, En/Spm sub-class, expressed
LOC_Os10g22520	10.1415	7.13941	5.17597	8.84179	8.65713	9.65248	12.454	9.40937	9.92706	7.45367	7.45076	8.24842	0.658208	0.999904	-0.0671895	0.288592	0.999971	0.161176	0.0386382	0.682338	0.314088	cellulase, putative, expressed
LOC_Os12g33300	6.65582	5.24807	6.19441	7.20862	6.21465	5.98518	4.98839	12.7294	10.9357	5.35423	5.6827	5.38952	0.695294	0.999904	0.0917223	0.479749	0.999971	0.165494	0.0387801	0.684347	0.483928	integral membrane protein DUF6 containing protein, expressed
LOC_Os08g41520	3.50351	2.79352	3.90861	2.9734	3.39848	5.34508	2.97684	4.74156	5.10518	2.2947	2.2314	3.63592	0.277266	0.999904	0.237223	0.10502	0.999971	0.353927	0.0388307	0.684746	0.451086	zinc finger, C3HC4 type domain containing protein, expressed
LOC_Os07g12690	0.351157	0.420654	0.249994	0.310392	0.675427	0.237248	0.329172	0.206158	0.1352	0.286349	0.527303	0.492358	0.48371	0.999904	-0.230295	0.694444	0.999971	-0.129175	0.0389136	0.685615	-0.679065	retrotransposon protein, putative, unclassified, expressed
LOC_Os02g01230	27.7678	25.7438	23.8767	28.1907	25.2632	28.4125	26.6867	31.423	31.8541	25.6073	27.0573	24.8234	0.96737	0.999904	-0.00298234	0.440682	0.999971	0.0562128	0.0389524	0.685615	0.150526	ribosomal protein, putative, expressed
LOC_Os02g20210	0.747512	0.122712	0.0256035	0.309827	0.278886	0.0838553	0.0793928	0.354082	0	0.599759	0.238047	0.165927	0.343749	0.999904	-0.665634	0.597703	0.999971	-0.371003	0.0389643	0.685615	-1.45149	disease resistance protein RGA1, putative, expressed
LOC_Os04g28980	0.3357	2.24421	1.47128	3.24942	2.36606	0.825237	0.424376	0	0.693091	3.30674	0.66941	1.85209	0.660978	0.999904	-0.415942	0.880239	0.999971	0.142895	0.0390081	0.685889	-1.95764	expressed protein
LOC_Os04g20590	12.1896	15.277	19.9389	15.1826	17.8402	19.4132	13.6694	14.2249	26.1835	12.1419	12.9612	15.1832	0.237713	0.999904	0.146243	0.0327323	0.999971	0.264483	0.0390713	0.685956	0.255575	YL1 nuclear protein C-terminal domain containing protein, expressed
LOC_Os01g59610	9.72418	8.89821	11.8272	6.93411	9.69951	15.3141	11.5141	9.56233	17.8447	8.05379	7.35213	13.5308	0.580765	0.999904	0.0808357	0.558757	0.999971	0.085581	0.0390798	0.685956	0.302013	KAZ1 - Kazal-type serine protease inhibitor precursor, expressed
LOC_Os07g36544	7.37495	3.48415	4.38679	4.06647	6.35931	7.21361	6.32902	6.39896	8.29192	4.93545	3.42382	4.77117	0.631967	0.999904	0.111145	0.225456	0.999971	0.281284	0.0390962	0.685956	0.478768	serine/threonine-protein kinase receptor precursor, putative, expressed
LOC_Os02g10660	4.53941	4.39879	3.76781	5.84539	4.47239	3.93935	7.00257	4.37934	5.36879	6.44576	3.49311	3.21586	0.927558	0.999904	0.0122123	0.375115	0.999971	0.119136	0.0391843	0.687006	0.277008	glycosyl hydrolases family 17, putative, expressed
LOC_Os03g48300	20.4531	18.6477	24.6045	28.6901	16.312	12.7755	18.2714	10.9315	12.7575	23.3321	16.472	19.4895	0.664946	0.999904	0.0746797	0.671887	0.999971	-0.0730356	0.0392729	0.688066	-0.355438	histidine acid phosphatase, putative, expressed
LOC_Os04g37790	12.505	13.4927	13.5389	12.2149	15.1179	15.7699	13.0514	18.1476	18.4062	14.3614	12.067	14.4387	0.736936	0.999904	-0.0307783	0.566006	0.999971	0.0525879	0.0393672	0.689223	0.188779	expressed protein
LOC_Os04g27260	0.265339	0.100863	0.0415466	0.167584	0.203645	0.217714	0	0.223442	0.0441877	0.347579	0.300437	0.195817	0.254161	0.999904	-0.846666	0.672765	0.999971	-0.313596	0.0394223	0.689693	-1.52935	retrotransposon protein, putative, Ty1-copia subclass
LOC_Os04g41630	25.8278	13.9395	5.50729	16.9471	14.4518	5.24718	7.92814	8.86589	3.5943	16.0863	12.9565	4.06836	0.145874	0.999904	0.28115	0.470477	0.999971	0.139526	0.0397358	0.694679	-0.397577	expressed protein
LOC_Os03g42830	9.02153	5.75049	15.1543	10.7904	6.46845	19.5594	7.9911	10.4163	22.0463	7.52249	6.14916	16.2884	0.925182	0.999904	0.0137146	0.17095	0.999971	0.199954	0.0398189	0.695034	0.300206	MATE efflux family protein, putative, expressed
LOC_Os07g07760	12.7529	13.8534	5.95356	9.91904	6.34392	7.12128	3.61195	10.3415	3.85427	13.2098	8.42323	10.2176	0.9381	0.999904	-0.0254538	0.352698	0.999971	-0.304617	0.0399498	0.695034	-0.673323	expressed protein
LOC_Os03g07180	4.81265	0.85335	1.44756	1.13393	1.43664	5.18756	1.06248	2.86061	8.11136	0.566417	0.649412	1.4733	0.199746	0.999904	0.790628	0.140321	0.999971	0.90921	0.0399725	0.695034	1.26648	embryonic protein DC-8, putative, expressed
LOC_Os12g08260	240.298	254.383	148.561	315.111	234.81	187.126	366.214	274.162	184.871	248.38	234.769	182.427	0.564304	0.999904	-0.0531599	0.329603	0.999971	0.0899044	0.040011	0.695034	0.189382	dehydrogenase E1 component domain containing protein, expressed
LOC_Os01g42430	122.266	143.637	160.248	127.429	144.641	172.577	142.633	159.271	178.91	125.265	134.546	161.927	0.882775	0.999904	0.00980626	0.424602	0.999971	0.0531014	0.0400214	0.695034	0.136569	vacuolar ATP synthase, putative, expressed
LOC_Os01g69120	216.962	184.167	99.5829	156.311	167.557	82.3424	151.431	122.173	85.9165	192.731	172.78	81.4919	0.134531	0.999904	0.127134	0.38033	0.999971	-0.0745311	0.0400308	0.695034	-0.174452	uncharacterized RNA methyltransferase pc1998, putative, expressed
LOC_Os06g12990	16.8298	18.29	19.7869	19.5748	15.9164	22.4446	20.5352	21.4233	29.5995	18.4379	18.5019	20.2504	0.685692	0.999904	-0.0423613	0.953405	0.999971	0.00611608	0.0400418	0.695034	0.214923	tRNA methyltransferase, putative, expressed
LOC_Os03g22370	435.093	167.208	66.6519	141.638	129.185	65.6358	83.9996	67.9014	86.331	350.271	146.744	85.4697	0.926722	0.999904	0.0324968	0.22346	0.999971	-0.430153	0.0400561	0.695034	-0.725473	ultraviolet-B-repressible protein, putative, expressed
LOC_Os10g26620	24.5908	37.5374	41.7473	34.0965	42.6604	53.4228	39.0776	44.3298	49.2933	30.7402	35.2768	50.1257	0.125993	0.999904	-0.115057	0.107178	0.999971	0.121141	0.0401244	0.695034	0.154337	dof zinc finger domain containing protein, putative, expressed
LOC_Os07g06860	0.134449	0.147141	0	1.00307	0.50161	0.0482636	1.02814	0.0566098	0	0.585601	0.456699	0.238752	0.00898817	0.999904	-1.76324	0.705369	0.999971	-0.255177	0.0401691	0.695034	-1.38495	gibberellin receptor GID1L2, putative, expressed
LOC_Os08g10260	4.9382	4.16757	5.1641	3.90117	3.4697	7.27672	6.30069	5.37192	7.11555	4.58752	4.67478	4.67341	0.894592	0.999904	0.0190954	0.979749	0.999971	-0.00365827	0.0402106	0.695034	0.295676	NBS-LRR disease resistance protein, putative, expressed
LOC_Os12g39880	0.366629	0.166288	0.377828	0.188328	0.318353	0.229889	0.0329288	0.29885	0	0.140364	0.391899	0.243912	0.832242	0.999904	0.173826	0.991649	0.999971	0.00858929	0.0402291	0.695034	-1.68337	expressed protein
LOC_Os01g02910	1.06215	0.831008	0.891712	1.0241	0.593569	0.632771	1.19051	1.865	1.63335	0.953231	0.754854	1.07989	0.988069	0.999904	0.00373947	0.359267	0.999971	-0.229248	0.0402394	0.695034	0.512948	glycosyltransferase, putative, expressed
LOC_Os03g19260	3.21833	2.59408	1.06384	1.86326	2.53102	1.35701	1.73621	1.97884	0.178652	2.71687	2.42935	1.02261	0.807875	0.999904	0.0901685	0.964814	0.999971	-0.0163575	0.0402497	0.695034	-0.760592	expressed protein
LOC_Os08g33200	12.0808	12.485	21.8403	11.8982	12.9109	13.2374	10.4814	12.3824	12.597	13.1664	13.1014	20.2646	0.867978	0.999904	-0.0202136	0.142147	0.999971	-0.178493	0.0402567	0.695034	-0.24942	1-phosphatidylinositol-4-phosphate 5-kinase/ zinc ion binding protein, putative, expressed
LOC_Os04g09350	20.2204	15.5155	12.4751	13.4262	18.4542	12.3279	13.8008	13.1579	7.97392	15.5198	15.1296	13.964	0.654532	0.999904	0.0585297	0.8692	0.999971	-0.0215395	0.0402893	0.695034	-0.268241	expressed protein
LOC_Os07g23520	56.9804	39.002	39.4472	50.0274	34.1487	32.909	38.4971	32.5204	33.3919	49.4627	39.4265	34.2721	0.226415	0.999904	0.0899674	0.454932	0.999971	-0.0555743	0.0402943	0.695034	-0.152522	expressed protein
LOC_Os08g30910	3.97144	1.47024	1.08823	2.20831	1.43413	0.897625	1.27062	0.670934	1.42889	3.04595	1.37401	1.66218	0.913966	0.999904	-0.0302718	0.292166	0.999971	-0.295156	0.0403059	0.695034	-0.574575	YDG/SRA domain containing protein, expressed
LOC_Os04g48810	5.99216	5.24625	0.69134	3.83435	2.07086	2.03781	10.1828	2.39021	2.57351	2.89188	1.96401	0.203651	0.137392	0.999904	0.84186	0.201498	0.999971	0.72383	0.0403218	0.695034	1.16196	expressed protein
LOC_Os11g32369	5.09252	4.73726	4.53511	2.8534	4.81319	4.53211	3.69597	2.71004	2.22619	3.74544	3.98423	5.12676	0.549442	0.999904	0.118584	0.73694	0.999971	-0.066545	0.040346	0.695034	-0.406151	expressed protein
LOC_Os07g33860	7.89133	4.71379	5.85083	4.5119	5.78663	3.67221	3.98072	3.57888	6.72574	8.43553	6.14736	9.20764	0.310983	0.999904	-0.260251	0.039698	0.999971	-0.52835	0.0403673	0.695034	-0.526576	60S ribosomal protein L44, putative, expressed
LOC_Os03g12730	0.245684	0.301142	0.107713	0.448055	0.168657	0.185208	0.104376	0.186202	0.0716004	0.484358	0.2295	0.16658	0.49879	0.999904	-0.273939	0.825529	0.999971	-0.0892778	0.0403831	0.695034	-0.83017	receptor protein kinase CLAVATA1 precursor, putative, expressed
LOC_Os08g13795	34.4941	22.5403	16.585	28.059	22.2603	15.3944	20.3516	21.5592	16.8033	34.5889	23.9943	18.1064	0.651778	0.999904	-0.0513578	0.197753	0.999971	-0.146574	0.0404214	0.695202	-0.233226	expressed protein
LOC_Os01g15270	995.208	452.33	334.554	619.744	475.816	520.382	711.816	606.785	615.654	555.753	403.552	389.495	0.322266	0.999904	0.181121	0.299504	0.999971	0.189847	0.0404959	0.695676	0.374873	expressed protein
LOC_Os05g50190	64.9021	48.6633	23.3932	52.7817	40.625	25.1074	74.8833	41.447	30.0992	45.2348	42.1793	24.9095	0.189758	0.999904	0.146604	0.696588	0.999971	0.0435947	0.040506	0.695676	0.22903	protein kinase domain containing protein, expressed
LOC_Os04g51150	50.1232	57.9824	95.2103	47.2124	62.9507	121.759	54.1182	71.9394	136.912	50.4455	60.6119	116.193	0.217419	0.999904	-0.0837273	0.903941	0.999971	0.00819232	0.0405471	0.695891	0.139032	transposon protein, putative, unclassified, expressed
LOC_Os11g22350	8.77345	9.44611	9.91358	9.05439	8.53069	7.74603	8.43169	7.99745	5.12126	8.30557	9.64865	9.86222	0.925119	0.999904	0.0124857	0.494877	0.999971	-0.090675	0.040654	0.696915	-0.271935	white-brown complex homolog protein, putative, expressed
LOC_Os08g07570	0.623638	0.893081	0.776548	0.849662	1.2325	0.832254	1.86596	1.05325	0.913926	0.881348	0.573113	0.198933	0.309407	0.999904	0.463916	0.127786	0.999971	0.695048	0.0406639	0.696915	0.934225	retrotransposon protein, putative, unclassified, expressed
LOC_Os05g02130	21.7082	24.0589	24.3667	22.8179	30.5069	31.5337	28.0007	31.3484	33.7818	25.0218	29.5547	26.3467	0.0427833	0.999904	-0.142364	0.552153	0.999971	0.041781	0.0407561	0.697946	0.143782	ankyrin repeat domain-containing protein 28, putative, expressed
LOC_Os10g41660	1.88362	3.15363	1.77479	2.08191	2.72223	3.108	2.86399	3.4785	4.35305	1.6363	3.00803	2.60336	0.744253	0.999904	-0.0650604	0.590463	0.999971	0.107328	0.0408068	0.697946	0.407938	zinc finger, C3HC4 type domain containing protein, expressed
LOC_Os02g46030	2.72944	0.628864	1.1809	2.91093	1.67218	1.94241	3.90592	1.63312	1.84209	2.37107	0.786174	1.82435	0.398575	0.999904	-0.170935	0.0930169	0.999971	0.340119	0.0408099	0.697946	0.414182	MYB family transcription factor, putative, expressed
LOC_Os02g40800	3.647	4.78954	5.36482	1.90939	3.38013	4.75438	0.652372	2.82868	2.57323	2.64012	2.49938	4.83397	0.237503	0.999904	0.354327	0.972668	0.999971	-0.0102773	0.0408474	0.698098	-0.613439	expressed protein
LOC_Os02g36280	0.32614	0.395366	1.15489	0.194101	0.359419	1.62105	0.29843	0.422527	1.63775	0.0690133	0.482904	0.421202	0.0758825	0.999904	0.743852	0.11415	0.999971	0.662019	0.0409675	0.698887	0.856478	cytochrome P450, putative, expressed
LOC_Os01g41250	1.20666	1.70897	2.25613	2.00053	1.8643	2.62443	1.99022	1.22533	0.703318	2.40817	2.10967	2.1313	0.34391	0.999904	-0.27939	0.915532	0.999971	-0.031309	0.0410008	0.698887	-0.603232	OsFBX17 - F-box domain containing protein, expressed
LOC_Os02g09430	8.73052	11.5156	10.8513	9.27119	11.3258	11.2661	10.6181	12.7578	11.2417	7.42998	11.549	9.39605	0.34214	0.999904	0.100219	0.219071	0.999971	0.12966	0.0410715	0.698887	0.215516	exostosin family domain containing protein, expressed
LOC_Os03g26220	6.98167	8.66394	8.58387	7.44825	6.01587	7.80202	7.94393	8.74221	10.3327	4.62051	8.42072	6.86051	0.175271	0.999904	0.2204	0.573639	0.999971	0.0914958	0.0410794	0.698887	0.33215	expressed protein
LOC_Os02g37950	9.23531	10.4339	8.49006	9.75185	8.19135	7.52997	9.0184	8.71258	5.86816	9.70308	9.9838	8.07183	0.862236	0.999904	0.0146289	0.311277	0.999971	-0.0853604	0.0411509	0.698887	-0.172147	transposon protein, putative, unclassified, expressed
LOC_Os07g36180	47.2523	37.6403	34.7257	34.0647	33.7822	36.0684	34.8502	28.2652	26.6393	40.3174	31.571	34.3188	0.157213	0.999904	0.114957	0.853791	0.999971	-0.0149768	0.041151	0.698887	-0.165955	pentatricopeptide, putative, expressed
LOC_Os01g67420	5.59488	4.6848	5.76933	4.007	3.8392	6.97001	5.39064	4.49129	6.98944	4.39511	3.54244	5.33484	0.0914081	0.999904	0.198948	0.460126	0.999971	0.0870553	0.0411598	0.698887	0.240658	lipase, putative, expressed
LOC_Os11g07950	27.8891	30.7873	44.2306	23.9096	32.4275	43.2147	26.2106	39.4556	57.7851	26.4183	30.2326	44.8818	0.82549	0.999904	0.0187991	0.810484	0.999971	-0.0204457	0.0411663	0.698887	0.17409	expressed protein
LOC_Os05g02435	0.155193	0.134726	0.0904348	0.0795598	0.0434203	0.0827912	0	0.142116	0	0.131696	0.104541	0.039748	0.657497	0.999904	0.388206	0.813739	0.999971	-0.206291	0.041168	0.698887	-1.78779	expressed protein
LOC_Os11g12810	24.0182	15.4379	18.1355	23.3364	15.4053	16.2987	16.2442	14.4602	17.4749	24.5027	16.8426	17.1986	0.833176	0.999904	-0.018431	0.479791	0.999971	-0.0618339	0.0411801	0.698887	-0.178659	sucrose-phosphate synthase, putative, expressed
LOC_Os11g09850	21.1029	15.2578	13.4119	18.488	18.3018	9.9801	15.1828	14.4304	11.14	20.1844	16.6743	13.4315	0.873906	0.999904	-0.0156592	0.335415	0.999971	-0.0950473	0.0412236	0.699001	-0.201417	expressed protein
LOC_Os09g29210	0.150906	0.247605	1.35176	0.920817	0.792589	1.6842	0.0453841	0.59575	0.552606	1.14846	0.621292	1.18336	0.142015	0.999904	-0.90799	0.838929	0.999971	0.125694	0.0412441	0.699001	-1.26216	purine permease, putative, expressed
LOC_Os02g56080	4.22307	3.89049	4.63352	4.24644	3.7467	3.21036	4.13208	2.05676	1.67998	5.08765	3.33954	3.78208	0.817757	0.999904	0.0555332	0.759043	0.999971	-0.0739233	0.0413362	0.699926	-0.49167	retrotransposon protein, putative, Ty3-gypsy subclass, expressed
LOC_Os04g23130	2.30927	2.29138	1.68739	1.19111	2.57318	0.331586	0.523234	1.68535	0	1.12934	1.65599	1.88883	0.65277	0.999904	0.296391	0.57592	0.999971	-0.368484	0.0413561	0.699926	-1.34385	expressed protein
LOC_Os08g10580	17.2634	14.9593	14.7045	18.2694	16.8177	13.7391	15.3135	14.6654	10.5344	16.7815	15.3767	16.133	0.731373	0.999904	-0.0310508	0.941088	0.999971	0.00668433	0.0414821	0.701054	-0.184394	expressed protein
LOC_Os01g08400	25.1771	26.7684	28.8182	27.1943	27.7724	29.5491	34.0228	29.86	30.6502	24.9941	28.4732	27.317	0.992424	0.999904	-0.000748916	0.542602	0.999971	0.048024	0.0415029	0.701054	0.160779	syntaxin, putative, expressed
LOC_Os01g64100	1.35531	1.33873	3.50425	2.91917	1.70105	3.11873	1.063	0.877932	3.92957	2.16688	2.10514	3.63536	0.190218	0.999904	-0.317109	0.932302	0.999971	-0.0205645	0.0415104	0.701054	-0.493455	glycosyl hydrolase, putative, expressed
LOC_Os04g31020	28.8227	39.7342	27.549	31.7704	38.6956	29.8855	30.3685	27.1515	21.3115	27.6753	36.9631	33.3366	0.804659	0.999904	-0.0263339	0.800765	0.999971	0.02687	0.0415532	0.701054	-0.216995	expressed protein
LOC_Os05g47780	10.1395	9.49492	6.80674	6.88009	9.35794	5.17804	6.98214	7.29113	4.11128	9.47541	7.66712	5.51127	0.115992	0.999904	0.163618	0.571318	0.999971	-0.0589289	0.0415665	0.701054	-0.212127	E3 ubiquitin ligase, putative, expressed
LOC_Os05g37650	2.12271	1.21671	1.35719	2.27674	0.809466	0.504614	1.80362	0	0.370866	1.8076	2.0491	1.01853	0.971232	0.999904	-0.0246635	0.533449	0.999971	-0.425904	0.0416493	0.701965	-1.39313	expressed protein
LOC_Os01g62020	57.7081	75.814	67.5946	58.0003	81.3522	65.3699	68.0782	89.9964	76.2946	60.2403	76.3484	68.5112	0.745402	0.999904	-0.021575	0.939263	0.999971	-0.00506279	0.0417678	0.703033	0.135269	NAD dependent epimerase/dehydratase family domain containing protein, expressed
LOC_Os04g37690	142.725	119.593	107.359	115.705	114.714	114.099	130.42	131.377	110.542	104.643	113.38	107.735	0.071015	0.999904	0.119627	0.37675	0.999971	0.0585685	0.0417704	0.703033	0.134895	RNA recognition motif containing protein, putative, expressed
LOC_Os10g33810	2.71967	1.42868	0.170337	0.858851	0.649389	1.19944	2.44288	2.09393	2.17399	0.855027	0.527899	0.602124	0.60819	0.999904	0.307723	0.622418	0.999971	0.295578	0.0418004	0.703053	1.22181	myb-related protein Myb4, putative, expressed
LOC_Os09g26144	1.18507	1.51036	3.07461	1.52537	2.3461	3.6079	2.1668	3.4865	4.26682	1.82944	2.48832	2.79944	0.0690141	0.999904	-0.279164	0.966108	0.999971	0.00652345	0.0418538	0.703304	0.312425	glutamate receptor, putative, expressed
LOC_Os12g02500	0.303003	3.62518	8.0582	0.251951	9.34023	9.98366	0.412615	2.94222	2.77871	3.59535	4.13993	11.3736	0.127258	0.999904	-0.96157	0.317333	0.999971	-0.630508	0.041873	0.703304	-1.283	esterase, putative, expressed
LOC_Os04g19740	23.411	14.0092	15.0743	18.1697	13.3154	19.3106	28.1949	18.7199	22.117	21.0827	17.8372	16.3475	0.494892	0.999904	-0.0730195	0.403381	0.999971	-0.0893928	0.04205	0.70537	0.217494	transketolase, chloroplast precursor, putative, expressed
LOC_Os03g01920	79.7899	41.7837	47.5284	62.8942	33.7448	42.7922	50.5378	34.3475	44.3521	73.507	39.9517	42.9138	0.336234	0.999904	0.0758678	0.174584	0.999971	-0.107109	0.0420538	0.70537	-0.160392	expressed protein
LOC_Os06g03800	7.59133	44.0484	97.1394	18.0048	93.6847	56.019	17.738	18.2847	19.4814	25.3504	43.515	122.609	0.341989	0.999904	-0.475579	0.814466	0.999971	-0.117447	0.0421358	0.705565	-1.01707	pollen ankyrin, putative, expressed
LOC_Os09g03939	3.78439	4.82634	3.83083	4.90296	4.51083	3.22561	2.67086	3.71382	2.43525	5.40444	4.18333	2.66463	0.738742	0.999904	0.0492356	0.693468	0.999971	0.0581867	0.0421576	0.705565	-0.299967	white-brown complex homolog protein 11, putative, expressed
LOC_Os07g12340	6.49543	14.6106	14.4813	6.17331	9.67597	8.49042	8.06066	13.684	12.0794	7.06069	11.3926	6.53118	0.0383284	0.999904	0.319558	0.949825	0.999971	-0.00970816	0.0422039	0.705565	0.313415	NAC domain-containing protein 67, putative, expressed
LOC_Os01g43020	85.9846	76.3617	46.3705	77.0683	74.5592	42.6221	78.0517	56.3592	39.546	82.7419	68.6164	46.4046	0.470536	0.999904	0.0477806	0.736545	0.999971	-0.0222766	0.0422131	0.705565	-0.134508	CTP synthase, putative, expressed
LOC_Os05g34550	18.4426	23.0229	18.4125	17.3983	17.3868	15.0661	18.3895	15.204	12.6657	18.2143	19.4486	16.7685	0.272181	0.999904	0.0910826	0.298625	0.999971	-0.0862161	0.0422452	0.705565	-0.168478	MLO domain containing protein, putative, expressed
LOC_Os06g15550	2.38616	1.3258	2.71596	1.82587	1.17786	2.33909	1.71555	1.58433	1.4978	2.94541	2.15624	3.08168	0.282939	0.999904	-0.272045	0.0782719	0.999971	-0.44612	0.0422779	0.705565	-0.51452	ubiquitin carboxyl-terminal hydrolase, family 1, putative, expressed
LOC_Os12g40570	62.2314	74.1984	53.422	63.1016	78.9462	59.4328	74.6964	82.3197	62.2312	62.9105	67.1083	61.2786	0.805256	0.999904	-0.0163058	0.477148	0.999971	0.0470156	0.0422955	0.705565	0.134295	WRKY94, expressed
LOC_Os10g35980	5.17099	1.69774	0.961483	2.90871	1.76386	1.78995	3.13833	1.47742	0.645855	3.34452	2.50928	1.93788	0.4286	0.999904	-0.21493	0.491626	0.999971	-0.186729	0.0423109	0.705565	-0.5513	tetraspanin family protein, putative, expressed
LOC_Os11g41875	158.101	190.406	177.501	129.686	157.975	211.428	167.339	228.194	253.052	162.776	183.85	200.477	0.626158	0.999904	-0.0390346	0.183801	0.999971	-0.106504	0.0423489	0.705565	0.16267	membrane protein, putative, expressed
LOC_Os04g27250	68.9541	65.7311	43.4307	40.8901	64.3455	38.9171	38.818	48.9435	34.5148	52.1156	54.6756	43.3861	0.130397	0.999904	0.154589	0.552312	0.999971	-0.0607405	0.0423548	0.705565	-0.207478	expressed protein
LOC_Os02g50080	0.849085	0.278772	0.11633	0.117309	0.190069	0.457199	0.541085	0	0	0.681256	0.480699	0.685359	0.5016	0.999904	-0.591658	0.315131	0.999971	-0.884452	0.0424766	0.707113	-1.78633	EF hand family protein, putative, expressed
LOC_Os01g33710	4.95368	5.00036	3.19383	4.31572	4.48774	3.72385	1.28747	2.94459	2.44574	4.38202	3.06841	3.01062	0.351615	0.999904	0.221444	0.416522	0.999971	0.193155	0.0426108	0.708352	-0.482016	expressed protein
LOC_Os01g47820	0.547128	0.69192	0.866207	0.64952	0.508046	0.989296	0.654277	1.17744	1.60632	0.464532	0.619499	0.82437	0.695661	0.999904	0.105831	0.692309	0.999971	0.107059	0.0426297	0.708352	0.548469	S-locus-like receptor protein kinase, putative, expressed
LOC_Os04g42500	15.7488	18.725	20.7778	17.944	17.4674	20.0312	12.7206	14.8175	10.6527	13.7279	19.0428	18.8954	0.625166	0.999904	0.0711998	0.574743	0.999971	0.0817715	0.0426983	0.708352	-0.295362	trafficking protein particle complex subunit, putative, expressed
LOC_Os11g31810	0.76292	0.500964	0.313576	0.94864	0.398489	0.547736	0.324117	0.722762	0	0.787014	0.809845	0.800551	0.485859	0.999904	-0.447529	0.665929	0.999971	-0.277247	0.0427094	0.708352	-1.30136	expressed protein
LOC_Os02g57200	11.1803	13.593	15.2372	10.4772	13.8648	15.765	10.5376	12.6574	11.1764	11.0885	13.4033	16.7857	0.760311	0.999904	-0.0252517	0.749191	0.999971	-0.0264629	0.0427271	0.708352	-0.167728	expressed protein
LOC_Os04g30140	3.99671	3.99909	4.38061	0.315532	2.21537	1.84463	0.485129	1.68281	0.332792	2.87951	2.58593	3.13386	0.587066	0.999904	0.352547	0.188912	0.999971	-0.85285	0.0428137	0.708352	-1.31486	expressed protein
LOC_Os09g02320	0.550111	0.597659	0.448493	0.684637	0.802249	1.81615	0.296808	0.598589	0	0.774487	0.66578	1.18166	0.556006	0.999904	-0.453111	0.832727	0.999971	0.162537	0.0428355	0.708352	-1.55862	retrotransposon protein, putative, unclassified
LOC_Os02g32840	4.95864	7.70247	9.11668	3.6243	4.53548	15.1589	7.74692	7.34111	20.3248	4.32687	7.15401	9.60596	0.81748	0.999904	0.0517913	0.803511	0.999971	-0.0558347	0.0428451	0.708352	0.454481	zinc finger A20 and AN1 domain-containing stress-associated protein, putative, expressed
LOC_Os04g12730	0.656042	1.5716	1.50763	1.28001	0.925567	1.12246	0.393601	1.2678	0	0.902636	1.8923	1.6804	0.821175	0.999904	-0.199884	0.777349	0.999971	-0.250061	0.0428717	0.708352	-1.79069	expressed protein
LOC_Os03g62690	7.8378	5.9441	1.964	2.77006	5.33525	2.00309	2.97558	2.60355	1.39372	4.17859	4.73962	1.99641	0.186914	0.999904	0.279015	0.65572	0.999971	-0.0942541	0.0428989	0.708352	-0.428046	pentatricopeptide, putative, expressed
LOC_Os02g49820	50.148	54.7508	40.9305	39.4859	51.311	34.2458	40.9912	38.1666	34.12	46.6	50.6729	35.0676	0.149914	0.999904	0.101331	0.418921	0.999971	-0.0568854	0.0429027	0.708352	-0.142489	RNA recognition motif family protein, expressed
LOC_Os08g10550	11.7941	12.4085	14.1976	13.4402	12.4761	14.845	14.0392	15.9644	13.6667	10.918	12.6777	13.9343	0.754872	0.999904	0.0243657	0.264685	0.999971	0.0870442	0.0429826	0.708352	0.157943	potassium transporter, putative, expressed
LOC_Os06g22870	60.4034	62.8307	46.8769	72.466	54.7615	53.6017	81.1331	63.3086	56.1322	63.2174	56.623	53.341	0.730948	0.999904	-0.023986	0.585541	0.999971	0.0380375	0.0429941	0.708352	0.141166	OsIAA21 - Auxin-responsive Aux/IAA gene family member, expressed
LOC_Os07g26410	3.48621	6.40422	12.3448	1.34747	8.50705	14.2048	2.01867	6.54474	5.72054	4.08275	7.49347	15.8104	0.534751	0.999904	-0.186075	0.242751	0.999971	-0.350148	0.0430219	0.708352	-0.606541	retrotransposon protein, putative, Ty3-gypsy subclass, expressed
LOC_Os10g42190	24.15	27.4135	24.8112	23.6954	28.5692	25.52	28.9282	31.6613	25.4093	20.5945	28.1851	25.7557	0.679092	0.999904	0.0309315	0.501719	0.999971	0.0502278	0.043031	0.708352	0.151285	leucine rich repeat containing protein, expressed
LOC_Os02g03830	16.7795	12.1928	7.96706	14.1159	10.6246	9.5594	21.7032	12.6999	13.7002	13.4551	10.6917	11.4493	0.978112	0.999904	-0.0037941	0.750008	0.999971	-0.0440629	0.0430362	0.708352	0.279809	expressed protein
LOC_Os03g25500	52.9745	54.601	68.4239	60.3745	69.7588	43.2254	41.7229	42.0455	53.6187	50.3208	71.0083	70.7096	0.610991	0.999904	-0.0818015	0.505244	0.999971	-0.107147	0.0430524	0.708352	-0.325366	cytochrome P450 72A1, putative, expressed
LOC_Os01g57880	6.23733	2.13688	3.26961	5.89483	2.96784	8.76145	6.14459	6.77491	11.4861	7.37718	2.20059	4.8449	0.51013	0.999904	-0.195414	0.45406	0.999971	0.222125	0.0430992	0.708352	0.60014	plastocyanin-like domain containing protein, putative, expressed
LOC_Os01g51870	88.7731	43.8956	35.4774	70.0544	60.836	41.2537	100.539	60.4395	54.1793	66.6608	52.8639	45.2419	0.693031	0.999904	-0.0479164	0.775262	0.999971	0.0346555	0.0431537	0.708352	0.245468	methyltransferase, putative, expressed
LOC_Os05g38530	14.2063	18.6003	100.994	9.11575	16.8293	96.4127	13.6416	22.8751	106.447	12.4418	18.1872	87.1283	0.252992	0.999904	0.100446	0.286527	0.999971	-0.0936503	0.0432057	0.708352	0.17765	DnaK family protein, putative, expressed
LOC_Os01g42880	82.5118	63.652	62.8313	69.2467	61.1818	75.2911	83.4549	79.0872	92.4681	75.0254	69.8821	75.6467	0.397547	0.999904	-0.0617154	0.333538	0.999971	-0.0705424	0.0432169	0.708352	0.147474	transferase family protein, putative, expressed
LOC_Os06g10810	36.8506	37.5513	35.0816	37.4728	39.2961	35.0452	45.6154	50.9335	38.9443	36.68	45.7388	35.1568	0.367368	0.999904	-0.0653266	0.557817	0.999971	-0.0424745	0.0433478	0.708352	0.146417	phosphate carrier protein, mitochondrial precursor, putative, expressed
LOC_Os11g36880	0.0933354	0.0583693	0.146144	0.0589492	0.175105	0.217265	0.135951	0.125093	0.233151	0	0.0830352	0.154981	0.215775	0.999904	0.808699	0.0803934	0.999971	1.14226	0.0433635	0.708352	1.31982	retrotransposon protein, putative, unclassified, expressed
LOC_Os04g38940	17.1143	16.411	13.3217	21.2569	16.7625	8.91776	18.5708	13.1729	6.13407	19.3976	16.2113	14.9724	0.679939	0.999904	-0.0769436	0.489899	0.999971	-0.128779	0.043448	0.708352	-0.376632	integral membrane protein, putative, expressed
LOC_Os12g27060	3.37414	3.89294	2.09985	2.65479	3.25166	2.61748	3.30425	4.27408	2.98333	2.66132	3.80426	1.89261	0.359223	0.999904	0.120697	0.666241	0.999971	0.0567797	0.0434519	0.708352	0.265834	PPR repeat domain containing protein, putative, expressed
LOC_Os02g38580	18.3936	32.816	28.4183	15.0084	22.0316	19.7392	19.3395	20.3196	18.9403	10.1447	22.1563	14.7625	5.20504e-05	0.084627	0.546769	0.0924846	0.999971	0.227349	0.0434604	0.708352	0.272864	protein phosphatase 2C, putative, expressed
LOC_Os04g02310	0.293901	0.28384	0.874993	0.0884228	1.08576	0.360455	0.051966	0.228816	0.187273	0.409822	0.255012	0.850334	0.910944	0.999904	-0.0642965	0.614589	0.999971	-0.28946	0.0434866	0.708352	-1.16064	retrotransposon protein, putative, Ty1-copia subclass, expressed
LOC_Os01g12770	15.324	6.35676	4.42136	11.322	5.88761	4.6096	6.87144	5.38372	4.15042	10.5077	6.52366	5.28279	0.680793	0.999904	0.0574089	0.706476	0.999971	-0.0525541	0.0435693	0.708352	-0.281645	cytochrome P450, putative, expressed
LOC_Os02g10630	1.1409	1.24072	0.434381	1.49994	0.939128	0.344887	1.04083	0.616905	0.181998	0.93604	1.12184	0.426525	0.629335	0.999904	0.104631	0.891046	0.999971	0.0296944	0.0435879	0.708352	-0.437466	GRAM and C2 domains containing protein, putative, expressed
LOC_Os01g02830	3.92383	6.69711	3.31342	4.61855	6.8211	3.34785	5.55796	4.98764	1.92078	4.89286	7.96129	4.10415	0.258419	0.999904	-0.20257	0.446906	0.999971	-0.13633	0.0436285	0.708352	-0.361649	receptor-like kinase ARK1AS, putative, expressed
LOC_Os06g23190	5.51089	6.17202	4.09566	3.3145	5.91388	3.52818	3.97543	4.03254	1.73875	4.31903	5.31542	3.26458	0.201316	0.999904	0.20588	0.878258	0.999971	-0.0246799	0.0436395	0.708352	-0.325063	receptor-like protein kinase 5 precursor, putative, expressed
LOC_Os12g11220	2.97162	0.800527	0.167029	0.421083	0.909677	0.273521	0.647414	0.0830007	0	0.908286	0.441584	0.344416	0.595029	0.999904	0.362756	0.905048	0.999971	-0.0814054	0.0436816	0.708352	-1.37656	expressed protein
LOC_Os06g27820	4.75448	4.48803	2.14578	4.19517	3.34976	1.29081	3.66634	2.59066	1.3041	3.55206	4.75004	2.61472	0.953272	0.999904	0.0120987	0.157779	0.999971	-0.291651	0.0437373	0.708352	-0.416361	expressed protein
LOC_Os01g74520	31.5559	37.9546	37.6284	34.4561	30.1985	42.8849	35.1725	36.3486	46.0717	31.9628	31.4021	36.9239	0.409235	0.999904	0.0647371	0.41517	0.999971	0.0639203	0.0437374	0.708352	0.158195	methyltransferase domain containing protein, putative, expressed
LOC_Os03g13740	1.04615	0.996746	1.24781	0.782193	0.789793	1.4138	1.30719	1.06234	2.15211	0.874639	0.627105	1.05305	0.32468	0.999904	0.266112	0.609751	0.999971	0.137916	0.0437507	0.708352	0.544843	immediate-early fungal elicitor protein CMPG1, putative, expressed
LOC_Os02g05410	3.23062	2.60614	3.60966	3.35132	3.41644	3.06817	2.57511	2.47007	2.81003	3.74046	2.84799	3.82438	0.465083	0.999904	-0.0979576	0.724408	0.999971	-0.0472787	0.0438091	0.708352	-0.270326	splicing factor 3B subunit 1, putative, expressed
LOC_Os05g44020	51.9174	37.0446	20.8093	36.9193	32.7821	16.7214	35.8541	27.391	19.3118	47.1735	30.9983	22.0422	0.403153	0.999904	0.0716914	0.0744468	0.999971	-0.152975	0.0438458	0.708352	-0.172844	acetyltransferase, GNAT family, putative, expressed
LOC_Os01g57560	13.207	8.16766	3.58463	16.8492	8.16114	2.5405	11.5102	5.5232	2.95833	15.6336	7.12287	3.76214	0.835185	0.999904	-0.0271261	0.65513	0.999971	-0.0582331	0.0438467	0.708352	-0.262784	serine/threonine-protein kinase receptor precursor, putative, expressed
LOC_Os03g39610	1201.65	303.121	320.816	573.426	184.77	314.818	320.725	174.266	361.746	1213.62	269.551	338.501	0.950052	0.999904	0.0175013	0.154388	0.999971	-0.397907	0.0438939	0.708352	-0.562998	chlorophyll A-B binding protein, putative, expressed
LOC_Os02g31922	2.85105	1.16446	2.79009	2.25085	2.55285	2.26621	2.5955	1.37193	1.54308	5.60207	2.24819	3.81357	0.123991	0.999904	-0.538903	0.222709	0.999971	-0.427187	0.0439076	0.708352	-0.705922	expressed protein
LOC_Os01g22370	43.6733	43.5907	20.314	41.9293	28.1432	32.8185	53.818	66.4979	38.5003	39.9428	43.1765	28.0152	0.670402	0.999904	-0.074572	0.682585	0.999971	-0.0716532	0.043939	0.708352	0.353006	peroxidase precursor, putative, expressed
LOC_Os02g46710	43.2356	45.8927	51.3946	39.215	44.4872	42.6252	39.3873	44.0658	33.2543	51.3346	46.8853	43.2887	0.936905	0.999904	-0.00757883	0.249425	0.999971	-0.110269	0.0439562	0.708352	-0.19287	expressed protein
LOC_Os08g35750	6.73422	0.914888	0.699929	2.7591	0.831705	1.4171	3.94614	2.93322	2.97769	2.82134	0.821657	1.38704	0.795955	0.999904	0.100547	0.988503	0.999971	0.00560312	0.0440598	0.708352	0.782928	Cupin domain containing protein, expressed
LOC_Os10g27180	6.02047	5.53861	5.62737	4.76269	5.91068	5.74854	3.94694	4.42646	3.24193	5.77274	5.25968	4.63755	0.521939	0.999904	0.0950364	0.744826	0.999971	0.0483032	0.0440779	0.708352	-0.298803	expressed protein
LOC_Os04g40050	7.36255	4.66435	6.12034	12.3782	4.21285	4.30639	7.7505	4.14974	2.36231	10.2018	5.06464	5.32778	0.668373	0.999904	-0.0902518	0.755637	0.999971	-0.065567	0.0441035	0.708352	-0.424123	ribonuclease H2 subunit B, putative, expressed
LOC_Os08g44200	25.1976	24.9343	28.4772	28.6563	25.8272	31.8875	31.5414	29.8016	33.7094	26.4322	25.2687	31.2588	0.464821	0.999904	-0.051869	0.545548	0.999971	0.0428931	0.0441085	0.708352	0.142852	ECT5, putative, expressed
LOC_Os08g40860	10.0814	11.9723	9.70287	10.7018	9.95014	9.19089	13.0565	12.2393	9.98156	8.88343	10.5795	9.33233	0.341912	0.999904	0.0958433	0.702283	0.999971	0.0385474	0.0441229	0.708352	0.202995	RNA pseudouridine synthase, putative, expressed
LOC_Os03g01830	133.785	89.9885	49.7101	97.3784	92.2459	44.2348	94.1796	67.3891	45.2695	116.058	85.8511	46.7886	0.289875	0.999904	0.0828187	0.512916	0.999971	-0.0511988	0.0441421	0.708352	-0.157495	DEAD-box ATP-dependent RNA helicase, putative, expressed
LOC_Os11g47310	1.88841	4.03369	2.8639	1.67273	4.77289	3.17126	2.18491	4.29702	3.04261	1.36318	3.95795	2.32576	0.183247	0.999904	0.183328	0.0874235	0.999971	0.235444	0.0441673	0.708352	0.277233	receptor kinase-like protein, identical, putative, expressed
LOC_Os03g18130	3.07122	14.5971	2.06097	1.75501	4.01206	5.65498	24.3914	24.9477	2.45989	3.00778	6.04593	1.64492	0.563646	0.999904	0.374863	0.881115	0.999971	0.0970897	0.044187	0.708352	1.30636	asparagine synthetase, putative, expressed
LOC_Os02g47400	4.13062	3.83802	3.48915	3.47053	3.83022	4.00657	2.86396	2.90494	3.44901	3.6516	4.36807	4.43052	0.577443	0.999904	-0.0818757	0.531354	0.999971	-0.0919892	0.0441884	0.708352	-0.295731	pectinacetylesterase domain containing protein, expressed
LOC_Os02g08180	234.063	186.983	250.931	244.13	187.728	285.016	264.675	253.229	321.837	229.896	223.79	269.256	0.301084	0.999904	-0.0778038	0.815834	0.999971	-0.0175233	0.0442082	0.708352	0.151386	protein transport protein SEC61 subunit gamma, putative, expressed
LOC_Os01g42870	53.8977	47.6815	53.4519	60.1594	49.3714	66.836	57.7295	58.7163	86.314	55.9046	53.4296	61.6894	0.210359	0.999904	-0.0983112	0.732038	0.999971	0.0268752	0.0442231	0.708352	0.157913	transferase family protein, putative, expressed
LOC_Os01g49110	0.81981	1.30918	0.968895	0.962362	0.615745	0.665859	0.360664	0.3628	0.912063	0.728177	1.31275	0.840662	0.784503	0.999904	0.0845928	0.452021	0.999971	-0.232644	0.0442237	0.708352	-0.622395	prenyltransferase, putative, expressed
LOC_Os12g18560	1.6436	1.1592	2.30188	1.16062	2.50732	1.63891	1.31894	2.11456	3.67232	0.795422	1.26652	1.94578	0.333013	0.999904	0.263608	0.280642	0.999971	0.293783	0.0442343	0.708352	0.547839	invertase/pectin methylesterase inhibitor family protein, putative, expressed
LOC_Os10g08790	2.37409	2.12174	0.371733	2.06173	3.74541	0.973982	1.44086	1.57082	0	1.55496	3.16814	0.876023	0.650064	0.999904	-0.246239	0.741024	0.999971	0.179384	0.0442404	0.708352	-1.09194	expressed protein
LOC_Os01g72350	11.5821	6.88764	9.19706	10.8295	8.89593	9.97099	10.3978	10.2127	11.951	10.8792	7.11629	9.28045	0.945713	0.999904	0.00654135	0.304021	0.999971	0.0987431	0.044244	0.708352	0.193267	amidohydrolase, putative, expressed
LOC_Os11g04030	0.395344	0.463446	1.01535	0.30125	0.272745	0.513669	0.138599	0.166649	0.444752	1.04932	0.331115	0.633685	0.908304	0.999904	-0.056023	0.271509	0.999971	-0.534846	0.0442462	0.708352	-0.978523	major facilitator superfamily antiporter, putative, expressed
LOC_Os10g36510	1.34986	1.87122	1.35622	2.61093	0.805779	1.61827	0.955783	0.568357	0.131131	1.65035	0.834427	1.67067	0.807558	0.999904	0.126073	0.801745	0.999971	0.129961	0.0442897	0.708352	-1.04104	expressed protein
LOC_Os01g13710	0.207296	0.0725968	0.0227208	0.114559	0.0371228	0	0.0704538	0	0	0.133058	0.0938864	0.0803155	0.746997	0.999904	-0.281032	0.219566	0.999971	-1.06949	0.0442955	0.708352	-1.75212	transposon protein, putative, unclassified, expressed
LOC_Os04g16775	172.653	113.914	105.547	94.6803	158.772	101.206	90.3186	106.006	83.1784	131.92	130.898	126.093	0.921264	0.999904	-0.0162466	0.476425	0.999971	-0.117043	0.0444361	0.708352	-0.330379	conserved hypothetical protein
LOC_Os07g25022	172.653	113.914	105.547	94.6803	158.772	101.206	90.3186	106.006	83.1784	131.92	130.898	126.093	0.921264	0.999904	-0.0162466	0.476425	0.999971	-0.117043	0.0444361	0.708352	-0.330379	conserved hypothetical protein
LOC_Os08g15264	172.653	113.914	105.547	94.6803	158.772	101.206	90.3186	106.006	83.1784	131.92	130.898	126.093	0.921264	0.999904	-0.0162466	0.476425	0.999971	-0.117043	0.0444361	0.708352	-0.330379	conserved hypothetical protein
LOC_Os09g24408	172.653	113.914	105.547	94.6803	158.772	101.206	90.3186	106.006	83.1784	131.92	130.898	126.093	0.921264	0.999904	-0.0162466	0.476425	0.999971	-0.117043	0.0444361	0.708352	-0.330379	conserved hypothetical protein
LOC_Os12g31490	18.2723	21.5763	23.6856	19.1153	21.1306	23.8167	24.2336	23.0807	23.8551	16.6313	22.846	20.8988	0.542379	0.999904	0.0535558	0.453155	0.999971	0.0659461	0.044439	0.708352	0.17669	expressed protein
LOC_Os03g63999	24.1908	10.5898	10.5659	18.7966	12.3836	8.42269	15.1453	8.19438	6.4669	25.1007	10.3487	8.22154	0.624823	0.999904	0.0781902	0.868176	0.999971	-0.0265379	0.0445025	0.708756	-0.321271	expressed protein
LOC_Os02g32980	11.8116	12.9373	4.26211	9.61667	8.3855	4.11791	15.116	12.7709	3.62644	9.44907	7.7602	3.86068	0.0685285	0.999904	0.276598	0.717016	0.999971	0.0550382	0.0445225	0.708756	0.305088	Cupin domain containing protein, expressed
LOC_Os10g28970	0.885549	0.290744	0.454973	0.4588	0.198231	0.205253	0.282161	0.256342	0	0.355256	0.56401	0.428875	0.892524	0.999904	0.102153	0.519824	0.999971	-0.486615	0.0446572	0.708808	-1.51808	BTB6 - Bric-a-Brac, Tramtrack, Broad Complex BTB domain, expressed
LOC_Os05g25560	0.874745	0.433985	0.127836	0.499798	0.522168	0.272142	0.743249	0.0491082	0	0.481264	0.346658	0.169457	0.783453	0.999904	0.180919	0.653452	0.999971	0.295563	0.0446812	0.708808	-1.32166	glycosyl hydrolase family 10 protein, putative, expressed
LOC_Os10g13550	24.5124	28.0073	33.83	31.8773	25.2375	29.9817	29.6214	28.3154	35.6928	24.4441	27.7849	24.9936	0.278902	0.999904	0.104012	0.215049	0.999971	0.119094	0.0446858	0.708808	0.192848	endonuclease/exonuclease/phosphatase family domain containing protein, expressed
LOC_Os08g32170	16.6043	17.1513	11.8913	15.9024	14.09	14.7407	19.0313	15.718	17.8149	15.5464	15.7185	11.8232	0.612132	0.999904	0.052445	0.652398	0.999971	0.0465907	0.0446873	0.708808	0.207655	oxidoreductase, 2OG-FeII oxygenase domain containing protein, putative, expressed
LOC_Os01g20820	169.36	92.7359	54.0121	102.046	100.421	56.5259	63.5283	72.5016	51.503	125.172	85.9402	64.0081	0.692076	0.999904	0.06911	0.750936	0.999971	-0.0553882	0.0447422	0.708808	-0.35024	expressed protein
LOC_Os03g11310	25.3819	14.1753	10.4874	15.1861	13.2944	8.00317	11.6943	10.7962	8.62652	17.8716	14.3429	8.81137	0.152386	0.999904	0.170512	0.358024	0.999971	-0.109508	0.044759	0.708808	-0.239109	PPR repeat domain containing protein, putative, expressed
LOC_Os03g55720	480.488	174.829	72.1912	169.318	162.969	71.1327	139.815	81.6477	70.1064	327.573	148.874	77.2806	0.535892	0.999904	0.158112	0.399125	0.999971	-0.215363	0.0447847	0.708808	-0.512534	cytochrome b6f complex subunit, putative, expressed
LOC_Os03g03370	13.6176	13.9639	20.1353	24.9542	15.1354	20.7287	28.8407	19.7025	23.2644	16.0578	16.7413	21.047	0.360802	0.999904	-0.130451	0.440072	0.999971	0.110214	0.044786	0.708808	0.286452	fatty acid hydroxylase, putative, expressed
LOC_Os09g21390	1.10027	0.551243	0.703911	0.991774	0.789328	0.755185	0.492013	0.672049	0.157847	0.779071	0.690187	0.710455	0.909379	0.999904	0.0366298	0.649527	0.999971	0.14624	0.0447873	0.708808	-0.645774	retrotransposon protein, putative, unclassified, expressed
LOC_Os06g36840	70.8002	56.7295	37.5478	57.9268	50.5125	38.9011	47.1403	38.4736	34.7241	72.3052	55.7103	30.6252	0.544662	0.999904	0.0664984	0.821419	0.999971	-0.0247781	0.0448318	0.709052	-0.220231	cysteine synthase, putative, expressed
LOC_Os03g07010	0.535258	0.213013	0	0.107565	0.232375	0	0.24807	0	0	0.267715	0.330577	0.219951	0.409389	0.999904	-0.721352	0.176984	0.999971	-1.18052	0.0448858	0.709445	-1.7538	retrotransposon protein, putative, unclassified
LOC_Os04g57280	0.556885	2.55971	3.20447	0.307755	1.41281	1.99907	0	1.28962	1.46065	0.765962	2.36455	2.15761	0.922703	0.999904	0.0571734	0.437724	0.999971	-0.457274	0.045006	0.710453	-1.18119	expressed protein
LOC_Os02g53040	10.1175	8.08891	10.0477	10.6189	14.2534	7.47749	12.8186	10.6374	12.0332	9.89047	8.86497	7.0746	0.567805	0.999904	0.0932291	0.215891	0.999971	0.201954	0.0450078	0.710453	0.32713	STE_MEKK_ste11_MAP3K.11 - STE kinases include homologs to sterile 7, sterile 11 and sterile 20 from yeast, expressed
LOC_Os05g39230	54.811	32.8396	8.06976	29.8451	31.6924	6.96611	33.9404	17.9181	7.02406	46.066	26.3747	8.98158	0.537969	0.999904	0.0949025	0.28128	0.999971	-0.166025	0.0451615	0.711349	-0.308666	low photochemical bleaching 1 protein, putative, expressed
LOC_Os06g48210	2.14579	2.12109	3.59107	2.6777	2.54803	2.35225	3.0191	2.97275	3.4159	1.39636	1.86793	3.57579	0.351167	0.999904	0.185487	0.360836	0.999971	0.181796	0.0451627	0.711349	0.398525	DEAD-box ATP-dependent RNA helicase, putative, expressed
LOC_Os02g36850	49.1407	19.3932	1.90417	9.66951	17.7411	1.51456	11.4928	7.94188	1.2296	25.0903	17.0364	1.68276	0.315048	0.999904	0.307161	0.27143	0.999971	-0.336232	0.0451687	0.711349	-0.612398	oxygen evolving enhancer protein 3, identical, putative, expressed
LOC_Os03g13590	31.1268	36.6582	34.0572	32.5245	33.8902	32.0213	39.4641	36.8276	37.4872	32.7877	33.5341	33.122	0.758357	0.999904	0.0212067	0.903269	0.999971	-0.00837776	0.0451812	0.711349	0.138072	potyvirus VPg interacting protein, putative, expressed
LOC_Os01g70400	297.133	131.907	43.2577	160.402	124.592	35.5897	155.134	81.8534	39.4894	214.208	126.861	41.8275	0.322538	0.999904	0.132841	0.250869	0.999971	-0.15419	0.0452195	0.711493	-0.268917	expressed protein
LOC_Os02g51080	310.191	89.8542	119.096	176.89	62.1304	122.555	80.0999	62.2163	141.585	322.327	88.9765	142.011	0.812925	0.999904	-0.0686079	0.205846	0.999971	-0.366754	0.0452595	0.711571	-0.580464	FAD binding domain containing protein, expressed
LOC_Os06g43180	5.65732	3.00488	0.826763	1.66743	2.61159	0.893563	1.34593	1.42921	0.527592	4.4267	2.09251	0.657566	0.347808	0.999904	0.275502	0.614077	0.999971	-0.147974	0.0453103	0.711571	-0.587411	cyclase family protein, putative, expressed
LOC_Os02g50130	24.6318	28.3992	43.9964	27.8411	32.9168	41.4818	20.7568	30.3028	38.0491	28.5816	31.3619	45.9171	0.270767	0.999904	-0.0972527	0.78216	0.999971	-0.0244175	0.0453134	0.711571	-0.176768	hydrolase, NUDIX family, domain containing protein, expressed
LOC_Os01g68260	0.406783	0.118715	0.346777	0.349693	0.188863	0.194699	0.691266	0.266429	0.790331	0.331559	0.0511766	0.145931	0.370588	0.999904	0.550586	0.451616	0.999971	0.462868	0.0453882	0.711571	1.23049	lysine ketoglutarate reductase trans-splicing related 1, putative, expressed
LOC_Os01g37090	8.02964	8.47749	7.76552	9.65802	7.54222	10.0885	12.8425	8.94939	13.9029	6.60492	7.88843	9.45508	0.907644	0.999904	0.0228389	0.494491	0.999971	0.134498	0.0454149	0.711571	0.393895	expressed protein
LOC_Os06g04280	127.84	119.032	142.026	120.447	96.9949	193.08	132.577	143.066	203.975	128.29	109.995	147.051	0.901192	0.999904	0.0131245	0.777466	0.999971	0.0298761	0.0454531	0.711571	0.211467	3-phosphoshikimate 1-carboxyvinyltransferase, chloroplast precursor, putative, expressed
LOC_Os02g53210	26.5607	27.8168	29.6648	31.144	33.7483	23.9295	26.5191	23.9867	21.291	29.5804	27.1922	30.6767	0.683811	0.999904	-0.0399268	0.93152	0.999971	0.00842445	0.0454924	0.711571	-0.196078	expressed protein
LOC_Os01g46800	2.0176	1.07248	3.47505	3.98213	1.93561	1.96586	0.734701	2.24513	1.34398	4.88943	2.85559	2.41956	0.266296	0.999904	-0.493348	0.555002	0.999971	-0.261969	0.0455	0.711571	-0.88761	WRKY15, expressed
LOC_Os06g12250	1.39467	1.56994	3.1883	2.20213	1.73642	3.14694	0.812584	2.31535	2.27613	2.15579	2.03034	4.21992	0.178105	0.999904	-0.321969	0.558505	0.999971	-0.139886	0.0455296	0.711571	-0.478127	sphingolipid C4-hydroxylase SUR2, putative, expressed
LOC_Os07g43890	49.7955	59.5126	66.2251	50.8926	56.7756	69.4069	60.1015	57.9866	87.8615	54.8309	57.1784	63.3007	0.955427	0.999904	-0.00414693	0.940407	0.999971	0.00554655	0.0455702	0.711571	0.148339	emp24/gp25L/p24 family protein, putative, expressed
LOC_Os06g43880	0.825875	0.764401	1.17433	1.82059	1.0019	0.782156	0.349026	0.390109	1.1675	0.958369	1.33678	1.17217	0.524203	0.999904	-0.232985	0.968623	0.999971	-0.0143899	0.0456269	0.711571	-0.731217	prenyltransferase, putative, expressed
LOC_Os02g26800	17.0715	19.7293	14.6482	14.3186	18.7274	13.8532	16.4447	17.4975	16.1025	14.3837	14.812	13.4678	0.0276249	0.999904	0.180136	0.281478	0.999971	0.088082	0.0456276	0.711571	0.163472	expressed protein
LOC_Os07g01214	8.98906	10.0024	8.8171	11.991	8.33521	5.56351	7.80082	6.10298	6.40085	10.5841	9.21709	7.3296	0.808762	0.999904	0.0339323	0.560191	0.999971	-0.0816762	0.0456319	0.711571	-0.280235	transposon protein, putative, unclassified, expressed
LOC_Os03g40650	12.3307	12.4342	14.4219	12.3443	12.7342	11.1721	11.2805	10.4667	8.93228	13.8716	11.0289	11.9309	0.478354	0.999904	0.0634527	0.903895	0.999971	-0.0108067	0.0456476	0.711571	-0.178882	bromodomain associated family protein, expressed
LOC_Os04g43420	179.581	145.277	84.5708	158.349	124.352	80.5917	130.53	96.3526	73.7261	153.157	121.157	75.3152	0.0224931	0.999904	0.15176	0.504294	0.999971	0.0444086	0.0456621	0.711571	-0.13291	PTAC5, putative, expressed
LOC_Os03g43840	38.8448	33.9768	35.9976	37.7836	39.5885	38.7548	54.2278	37.3259	42.9358	34.7987	39.1499	37.2402	0.807691	0.999904	-0.0223116	0.612219	0.999971	0.0464653	0.045694	0.711613	0.183164	LSD1 zinc finger domain containing protein, expressed
LOC_Os05g03770	0.328725	0.170801	0.135121	0.229352	0.12449	0.125146	0.222322	0.315529	0	0.399633	0.374787	0.462046	0.348001	0.999904	-0.706763	0.211147	0.999971	-0.941689	0.0457832	0.712547	-1.50423	expressed protein
LOC_Os07g20360	0.663348	0.427939	0.727065	0.424473	0.796166	0.426117	0.355977	0.235202	0	0.783058	0.395311	0.315626	0.738504	0.999904	0.240115	0.860639	0.999971	0.126274	0.0458315	0.712734	-1.43633	retrotransposon protein, putative, unclassified, expressed
LOC_Os04g08764	9.75027	15.2122	18.0086	12.1564	18.5283	16.1319	10.9505	16.3362	14.9058	11.8796	18.1453	22.897	0.0420456	0.999904	-0.204892	0.321223	0.999971	-0.0999684	0.0458537	0.712734	-0.201231	avr9/Cf-9 rapidly elicited protein 137, putative, expressed
LOC_Os05g51530	122.743	126.826	135.506	117.567	127.54	158.534	149.046	156.174	148.542	122.508	132.522	144.66	0.58605	0.999904	-0.0362261	0.927144	0.999971	0.00608273	0.0459949	0.713522	0.132742	vacuolar ATP synthase subunit C, putative, expressed
LOC_Os02g58630	14.4338	3.51029	6.1523	5.31775	6.2227	4.60563	0	8.77838	0	5.14702	5.90163	5.69582	0.823683	0.999904	0.1928	0.965494	0.999971	-0.0374332	0.0460228	0.713522	-1.72645	expressed protein
LOC_Os03g59200	2.03801	3.97418	3.88422	2.86702	3.19342	2.56272	4.01425	6.66956	3.80706	1.59303	4.57551	3.73877	0.831855	0.999904	0.0470398	0.828236	0.999971	-0.0480679	0.046049	0.713522	0.441975	expressed protein
LOC_Os02g58480	2.70973	1.21399	1.30905	2.18569	1.08978	2.42547	2.51445	2.06667	1.75317	2.23347	0.857867	1.33967	0.420739	0.999904	0.17123	0.202021	0.999971	0.271329	0.0460529	0.713522	0.424259	sucrose synthase, putative, expressed
LOC_Os11g04560	3.77865	6.20987	14.7357	3.36397	9.20818	14.5987	6.24317	7.54128	14.4319	3.74446	6.16243	11.6363	0.592757	0.999904	0.0837058	0.262136	0.999971	0.175498	0.0460924	0.713522	0.312156	calmodulin-like protein 1, putative, expressed
LOC_Os05g25370	1.493	0.931693	2.40239	2.29971	0.777453	1.14031	0.755741	1.11013	1.01834	2.15548	1.03407	2.57432	0.567859	0.999904	-0.17983	0.278672	0.999971	-0.341051	0.0461463	0.713522	-0.627775	TKL_IRAK_CrRLK1L-1.2 - The CrRLK1L-1 subfamily has homology to the CrRLK1L homolog, expressed
LOC_Os03g62040	8.40372	7.20645	5.36253	6.76485	7.14679	4.54573	6.35793	4.86327	4.29434	6.94937	7.29942	5.32749	0.60265	0.999904	0.0607511	0.567309	0.999971	-0.0667523	0.0461562	0.713522	-0.232687	retrotransposon protein, putative, unclassified, expressed
LOC_Os12g22210	1.59755	0.8298	0.197148	0.783991	0.710072	0.166199	1.19536	0.320581	0	1.18562	0.789765	0.237502	0.94248	0.999904	0.0545674	0.705876	0.999971	-0.285417	0.0461962	0.713522	-1.5077	retrotransposon protein, putative, unclassified, expressed
LOC_Os01g44390	23.5376	7.75198	10.0451	18.81	9.72101	5.40029	11.7052	5.79206	6.45561	17.5578	8.37958	8.22942	0.412395	0.999904	0.137575	0.695941	0.999971	-0.0655922	0.0462619	0.713522	-0.334501	MYB family transcription factor, putative, expressed
LOC_Os05g25640	204.167	196.645	283.408	208.758	162.133	397.248	231.55	256.284	457.186	221.564	191.482	347.615	0.403177	0.999904	-0.0868868	0.78201	0.999971	-0.0287593	0.0464027	0.713522	0.207012	cytochrome P450, putative, expressed
LOC_Os06g07770	0.822799	1.37672	1.19242	1.10141	1.13512	0.958289	0.823399	0.954633	0.52221	1.04788	1.01962	1.08034	0.760691	0.999904	0.0518525	0.932497	0.999971	0.0144205	0.0464243	0.713522	-0.339047	expressed protein
LOC_Os01g01060	66.6856	69.2703	72.1361	62.1168	56.2436	87.07	75.7202	85.7044	106.565	70.3518	73.8281	85.2482	0.213783	0.999904	-0.0951495	0.107952	0.999971	-0.123026	0.0464386	0.713522	0.152409	40S ribosomal protein S5, putative, expressed
LOC_Os01g02790	0.509192	1.39603	2.5906	0.475364	0.653334	1.02325	0.198732	1.29439	0.207839	0.490458	1.81586	1.12126	0.668356	0.999904	0.201391	0.42657	0.999971	-0.373761	0.0464496	0.713522	-0.936093	protein kinase domain containing protein, expressed
LOC_Os04g38880	10.5814	9.56871	13.7758	13.7819	11.3281	15.2295	12.0721	12.0482	22.0062	9.83941	10.7998	14.6922	0.755623	0.999904	-0.037941	0.24411	0.999971	0.141992	0.0464539	0.713522	0.242743	dynein light chain type 1 domain containing protein, expressed
LOC_Os03g61560	29.1861	27.1665	23.4402	29.9848	22.4877	19.3848	29.6783	28.3129	29.4766	26.6642	25.2217	23.5374	0.490092	0.999904	0.0530502	0.42184	0.999971	-0.0617415	0.0465222	0.713522	0.153012	expressed protein
LOC_Os02g54280	0.372463	0.457926	0.295322	0.122626	0.274407	0.386889	0.255872	0.607282	0.646668	0.218	0.376865	0.245631	0.262027	0.999904	0.300898	0.600399	0.999971	-0.140529	0.0465475	0.713522	0.533969	retrotransposon protein, putative, unclassified, expressed
LOC_Os03g22259	4.93064	0.53961	0.295545	1.83076	1.08074	0.359525	1.50558	0.55145	0	3.17897	0.545199	0.845725	0.800472	0.999904	-0.196418	0.763422	0.999971	-0.233919	0.0465992	0.713522	-1.5465	expressed protein
LOC_Os09g10201	6.40471	3.08062	2.12869	4.30457	4.86172	0.629707	2.87452	3.05992	0	4.94046	4.5754	2.19471	0.950425	0.999904	-0.0552594	0.628938	0.999971	-0.429483	0.0466037	0.713522	-1.76859	expressed protein
LOC_Os03g12160	8.73456	9.64496	7.37906	9.91439	8.82209	5.99102	9.24341	7.6173	5.51007	9.80691	9.65607	6.51175	0.976205	0.999904	0.0022573	0.49047	0.999971	-0.0521864	0.046641	0.713522	-0.15057	leucine-rich repeat family protein, putative, expressed
LOC_Os05g33120	2.30841	2.40695	3.26009	1.84837	3.33478	3.28018	1.92545	2.36641	1.87316	2.33295	2.79403	4.05696	0.499625	0.999904	-0.126228	0.641232	0.999971	-0.0871294	0.0466743	0.713522	-0.371954	retrotransposon protein, putative, unclassified, expressed
LOC_Os05g08620	11.2277	9.22646	8.31204	10.6679	10.2297	16.9703	10.7114	12.1917	17.2216	7.49573	9.5346	11.4476	0.923064	0.999904	0.0164897	0.109506	0.999971	0.273265	0.0467537	0.713522	0.339532	expressed protein
LOC_Os01g09030	4.3134	3.2748	3.03551	4.74989	3.52495	2.70826	4.59814	2.49303	3.00582	4.93308	3.98285	3.81313	0.145985	0.999904	-0.186092	0.197436	0.999971	-0.164976	0.0467558	0.713522	-0.254526	2-aminoethanethiol dioxygenase, putative, expressed
LOC_Os02g11770	2.55993	1.85484	0.483762	7.31746	1.21195	0.507004	0.900044	0.14867	0.926125	5.01848	0.949521	1.25403	0.612965	0.999904	-0.307392	0.892725	0.999971	-0.0819497	0.0467813	0.713522	-1.20823	expressed protein
LOC_Os01g59510	76.8849	57.0896	42.3991	55.5621	53.3324	40.2752	48.4642	50.4666	39.3706	66.5873	57.7508	40.0914	0.41823	0.999904	0.062305	0.279261	0.999971	-0.0832775	0.0467876	0.713522	-0.153028	chloroplast ribonuclease III domain protein, putative, expressed
LOC_Os10g12090	0.966844	9.4807	2.54331	3.74955	12.5646	2.55877	0	5.11002	1.80333	9.2202	7.73289	3.39655	0.338909	0.999904	-0.683213	0.769761	0.999971	-0.209101	0.046799	0.713522	-1.42034	expressed protein
LOC_Os10g42900	4.64367	3.55913	2.93044	7.32723	2.99597	4.63604	4.29052	3.12045	3.51771	9.21863	3.82393	3.7861	0.0501706	0.999904	-0.337848	0.609137	0.999971	-0.0882016	0.0468217	0.713522	-0.34292	peptide transporter PTR2, putative, expressed
LOC_Os07g40690	1.74128	0.2511	0.798883	0.180277	1.1258	0.436901	0.276219	0.242101	0.0942958	0.935794	0.570907	0.732809	0.963974	0.999904	-0.0294516	0.473199	0.999971	-0.46771	0.0469276	0.713522	-1.2956	NAD dependent epimerase/dehydratase family protein, putative, expressed
LOC_Os12g02340	112.081	130.967	127.504	188.167	107.6	99.6259	101.828	95.6649	125.018	201.083	136.372	131.991	0.223395	0.999904	-0.220219	0.286494	0.999971	-0.19278	0.047067	0.713522	-0.359154	LTPL14 - Protease inhibitor/seed storage/LTP family protein precursor, expressed
LOC_Os04g51260	0.103601	0.163268	0.113552	0.297718	0.061843	0.133883	0.316897	0	0	0.208995	0.0938433	0.133798	0.900631	0.999904	-0.099428	0.991921	0.999971	-0.0080629	0.0470785	0.713522	-1.5811	expressed protein
LOC_Os02g57800	2.35676	2.60958	1.63345	2.60486	2.80333	1.21925	2.20862	1.76573	0.929248	2.38352	2.36437	1.79041	0.991333	0.999904	-0.00183693	0.816453	0.999971	-0.0392529	0.0471138	0.713522	-0.335738	PPR repeat containing protein, expressed
LOC_Os03g19390	46.2511	44.6983	44.8661	44.3588	38.3591	49.4598	45.1762	55.365	62.7801	42.6725	49.2617	43.8208	0.983756	0.999904	0.00186157	0.75904	0.999971	-0.0280465	0.0471169	0.713522	0.181519	TENA/THI-4 family protein, putative, expressed
LOC_Os01g71190	20.498	5.82617	14.7128	11.4221	5.52245	8.90049	4.83267	4.38187	9.30429	16.5226	5.30735	10.1518	0.367477	0.999904	0.225686	0.545686	0.999971	-0.151317	0.0471237	0.713522	-0.497142	photosystem II reaction center PSB28 protein, chloroplast precursor, putative, expressed
LOC_Os02g06540	1.37192	2.19519	0.67407	0.993465	2.11797	0.509464	2.13039	1.65326	2.12319	1.06279	1.20521	0.885899	0.542325	0.999904	0.192633	0.961949	0.999971	-0.0150832	0.0471318	0.713522	0.627602	transporter family protein, putative, expressed
LOC_Os06g49500	53.1559	30.4016	18.3823	43.2942	28.7644	16.6474	42.2076	24.2646	16.282	52.7737	26.2006	18.9531	0.576216	0.999904	0.0413369	0.303889	0.999971	-0.0760389	0.0471397	0.713522	-0.146811	integral membrane protein, putative, expressed
LOC_Os01g70090	70.7474	79.325	70.8556	68.9958	86.4004	89.28	79.8302	80.0094	94.4773	66.7806	80.3051	76.2469	0.884945	0.999904	-0.00973448	0.181437	0.999971	0.0898981	0.0471525	0.713522	0.133529	enoyl-CoA hydratase/isomerase family protein, putative, expressed
LOC_Os11g08660	11.6647	9.42281	8.04925	12.1754	10.3076	6.93151	11.1619	9.03647	6.10705	11.8136	10.9944	8.19665	0.489856	0.999904	-0.0620829	0.468217	0.999971	-0.0652157	0.0472209	0.713522	-0.1784	TOPBP1A - Similar to DNA replication protein TOPBP1 from, expressed
LOC_Os09g21250	29.1214	23.0002	12.667	16.1498	21.0306	13.2683	16.9573	16.0772	10.9202	22.7351	20.9831	12.6571	0.333634	0.999904	0.112841	0.413859	0.999971	-0.0953694	0.0472498	0.713522	-0.231567	expressed protein
LOC_Os11g10760	9.15339	8.67174	11.2258	7.9648	10.3972	11.5582	10.1093	10.1096	10.7776	7.73252	8.60207	9.84126	0.252	0.999904	0.102286	0.149788	0.999971	0.128607	0.0472512	0.713522	0.177161	NBS-LRR disease resistance protein, putative, expressed
LOC_Os12g32760	1.57527	4.59726	10.7158	3.86911	3.32849	18.221	2.29451	5.22191	17.693	2.29279	1.84026	9.91377	0.453957	0.999904	0.205071	0.0357084	0.999971	0.575156	0.0472545	0.713522	0.543328	transporter family protein, putative, expressed
LOC_Os07g29200	7.98496	5.43744	7.77951	3.92247	10.0626	2.22941	3.76923	3.36207	0	8.13543	5.52515	2.86455	0.643014	0.999904	0.307527	0.861587	0.999971	-0.115685	0.0472574	0.713522	-1.31638	mycolic acid methyl transferase, putative, expressed
LOC_Os07g03540	1.20109	1.08846	1.17846	1.45747	1.88287	1.14976	0	1.01144	0.77786	0.856609	1.51107	1.5634	0.888512	0.999904	-0.0887955	0.821689	0.999971	0.142752	0.047282	0.713522	-1.25653	expressed protein
LOC_Os02g20844	16.9654	15.917	18.4648	13.5307	13.4475	14.4881	15.6477	20.1398	19.1702	12.8541	16.4833	16.5543	0.210529	0.999904	0.116739	0.318143	0.999971	-0.0930731	0.0472954	0.713522	0.184942	expressed protein
LOC_Os01g64250	2.39969	1.93063	0.853034	2.97489	1.39375	1.07096	4.35345	3.24963	1.4365	2.8546	1.65229	1.21453	0.565649	0.999904	-0.12261	0.701271	0.999971	-0.081873	0.0473389	0.713522	0.423287	hemerythrin family protein, expressed
LOC_Os03g02070	75.0669	93.6844	146.24	68.9274	78.7201	181.881	84.9929	99.6116	195.688	67.4533	97.0844	157.021	0.996208	0.999904	-0.00039008	0.887324	0.999971	-0.0116282	0.0473616	0.713522	0.162744	heavy-metal-associated domain-containing protein, putative, expressed
LOC_Os01g41710	1838.52	286.214	140.15	309.603	149.107	124.229	209.283	149.036	143.193	1549.46	253.768	161.787	0.91252	0.999904	0.0488388	0.0719313	0.999971	-0.799996	0.0473658	0.713522	-0.881554	chlorophyll A-B binding protein, putative, expressed
LOC_Os12g05690	34.0107	29.7245	23.9313	35.0055	30.4713	33.5046	30.478	43.592	36.9901	27.9413	31.446	28.0819	0.952728	0.999904	-0.00697525	0.286408	0.999971	0.125432	0.0473725	0.713522	0.233319	expressed protein
LOC_Os01g74152	12.8362	8.77224	5.24836	9.78446	9.92027	4.53562	16.0693	11.3176	5.67581	10.442	9.659	4.78101	0.604116	0.999904	0.0672132	0.827729	0.999971	-0.0282099	0.0473881	0.713522	0.257037	haloacid dehalogenase-like hydrolase family protein, putative, expressed
LOC_Os01g08830	36.6035	33.4526	31.2003	37.2258	39.2781	35.6451	43.1396	33.602	37.1136	30.6796	35.6884	31.809	0.685273	0.999904	0.0303979	0.0690428	0.999971	0.136369	0.0473893	0.713522	0.14872	OsFBDUF1 - F-box and DUF domain containing protein, expressed
LOC_Os05g22724	607.155	260.685	313.975	293.284	400.544	264.751	238.228	233.621	209.123	429.675	319.085	285.585	0.695598	0.999904	0.079018	0.711526	0.999971	-0.0746836	0.047394	0.713522	-0.400425	chloroplast 50S ribosomal protein L16, putative, expressed
LOC_Os12g19381	3504.57	1261.38	940.08	927.112	1168.75	1001.08	710.423	538.933	906.941	2600.88	1153.13	913.602	0.688618	0.999904	0.138403	0.374337	0.999971	-0.306825	0.0474171	0.713522	-0.684728	ribulose bisphosphate carboxylase small chain, chloroplast precursor, putative, expressed
LOC_Os11g02760	12.2284	13.1075	11.1389	13.1665	9.83441	9.93432	14.033	10.2258	5.11575	15.0836	12.8805	11.1126	0.721922	0.999904	-0.0636094	0.341339	0.999971	-0.170068	0.047446	0.713522	-0.354301	histidine triad family protein, putative, expressed
LOC_Os03g31870	1.81236	2.99721	3.97289	2.22573	2.64456	0.144575	0.342204	1.18704	0.234747	1.66186	2.2801	1.56042	0.496806	0.999904	0.415488	0.405612	0.999971	-0.508498	0.0475258	0.713522	-1.21162	hypothetical protein
LOC_Os09g28860	20.0247	6.08254	2.68753	5.87195	11.2216	3.81422	4.16681	6.1945	0	11.6167	9.71719	1.58335	0.76227	0.999904	0.188352	0.87355	0.999971	0.0990949	0.0475427	0.713522	-1.23373	late embryogenesis abundant protein D-34, putative, expressed
LOC_Os01g44310	22.1519	20.3231	20.3565	21.8763	21.8675	21.7283	24.2091	23.0257	22.7633	22.169	19.7818	19.567	0.751039	0.999904	0.0214878	0.330229	0.999971	0.065943	0.0475444	0.713522	0.134196	dnaJ domain containing protein, expressed
LOC_Os05g07300	15	6.88896	6.52498	12.5629	6.54624	5.03681	8.36139	5.63944	5.36505	12.4292	5.81155	6.60266	0.272255	0.999904	0.114902	0.668024	0.999971	-0.0448837	0.0475476	0.713522	-0.207368	serine/threonine-protein kinase receptor precursor, putative, expressed
LOC_Os10g21230	43.3909	16.3222	19.2386	26.0279	20.1746	18.9419	17.6004	19.9223	17.2843	32.0901	23.6393	25.696	0.538536	0.999904	-0.119452	0.253428	0.999971	-0.221813	0.0475494	0.713522	-0.384826	ATP synthase C chain, putative, expressed
LOC_Os01g16900	78.3758	84.476	97.847	78.3677	87.8819	107.399	82.1565	96.7367	112.548	74.9407	84.2282	96.3419	0.757413	0.999904	0.0206488	0.31395	0.999971	0.0673165	0.0475944	0.713522	0.132429	dehydrogenase, putative, expressed
LOC_Os11g12230	0.0820139	0.109087	0.269675	0.231641	0.172957	0.147204	0.209056	0.0690639	0	0.576776	0.185724	0.242656	0.339143	0.999904	-0.717719	0.539626	0.999971	-0.460564	0.0476411	0.713522	-1.48713	retrotransposon protein, putative, unclassified, expressed
LOC_Os11g03660	12.8719	6.76733	8.56842	11.1358	8.28465	11.3765	17.135	10.298	17.297	10.6658	10.4785	10.3225	0.380667	0.999904	-0.14488	0.859147	0.999971	-0.0293274	0.047718	0.713522	0.327198	VQ domain containing protein, putative, expressed
LOC_Os05g33960	5.77853	3.65495	4.64784	4.58979	5.24626	6.71991	6.3847	10.4538	4.99452	2.7803	3.81875	6.02986	0.611965	0.999904	0.141631	0.266298	0.999971	0.310368	0.0477402	0.713522	0.552728	peptide transporter PTR2, putative, expressed
LOC_Os02g35180	17.6692	8.31564	14.8718	7.43178	7.05559	10.8671	4.35533	5.71301	11.0369	17.142	7.52799	10.9229	0.593985	0.999904	0.14553	0.272676	0.999971	-0.299463	0.0477491	0.713522	-0.540437	OsRR2 type-A response regulator, expressed
LOC_Os04g30720	0.54324	0.147606	0.102659	0.144931	0.0670925	0.0806933	0.159165	0.126197	0	0.240476	0.169682	0.19354	0.97418	0.999904	0.021172	0.271	0.999971	-0.720037	0.0477646	0.713522	-1.29481	kinesin motor domain containing protein, putative, expressed
LOC_Os02g10390	1964.22	954.318	1106.29	1353.45	553.138	1143.56	823.961	544.226	1287.43	1907.94	907.537	1145.08	0.943759	0.999904	0.0145233	0.17708	0.999971	-0.277886	0.047801	0.713522	-0.407448	chlorophyll A-B binding protein, putative, expressed
LOC_Os01g53710	16.008	13.5898	18.185	21.7405	14.0242	18.3096	11.5091	12.6344	18.8499	19.225	14.5297	20.109	0.323894	0.999904	-0.117191	0.999944	0.999985	-8.41021e-06	0.0478037	0.713522	-0.23511	dual specificity protein phosphatase, putative, expressed
LOC_Os12g25700	18.596	18.048	20.5746	16.9076	17.154	22.1979	22.4094	23.5646	19.801	17.9181	18.7745	19.1809	0.789972	0.999904	0.022159	0.987432	0.999971	0.00131048	0.0478061	0.713522	0.164652	UDP-glucose 6-dehydrogenase, putative, expressed
LOC_Os07g18550	4.37405	2.37114	6.25537	18.2838	3.71698	6.11942	1.88689	1.20573	0	2.82645	6.53866	8.18876	0.741526	0.999904	-0.256182	0.682787	0.999971	0.31741	0.0478576	0.713671	-1.53681	hypothetical protein
LOC_Os02g01490	14.8837	13.5126	16.7001	14.5003	15.0059	14.6351	16.0327	16.4317	19.3588	15.6939	13.6206	15.8038	0.973512	0.999904	-0.00236793	0.804703	0.999971	-0.0176337	0.0478939	0.713671	0.141083	expressed protein
LOC_Os03g45980	0.131509	0.259063	0.0720706	0.181692	0.294385	0.259646	0.11174	0.110744	0.0766521	0.21103	0.502552	0.764285	0.117617	0.999904	-1.08904	0.417654	0.999971	-0.564053	0.0479039	0.713671	-1.37671	expressed protein
LOC_Os12g34900	2.34514	2.66193	1.95771	2.87878	1.40608	1.45534	2.62189	1.34765	1.19249	2.45563	2.75612	2.28305	0.716844	0.999904	-0.0781943	0.141158	0.999971	-0.317255	0.0479955	0.714526	-0.426331	expressed protein
[truncated: 54,348 more rows]
